# Supplementary material
Source: publisher site journal article supplement (https://www.dovepress.com/article/103330)

## Additional file 4

### Selecting the preferred model for the four health domains in the single-item strategy based

#### on

- Profile plots (from Latent GOLD): The Profile Plot is constructed from the conditional probabilities for the nominal variables and means for the other indicators as displayed in the columns of the Profile table ('profile in numbers'). The quantities associated with the clusters are plotted and connected to form a line graph.
  - For the scale types ordinal and continuous, prior to plotting the class-specific means, they are re-scaled to always lie within the 0-1 range. Scaling of these "0-1 Means" is accomplished by subtracting the lowest observed value from the class-specific means and dividing the results by the range, which is simply the difference between the highest and the lowest observed value. The advantage of such scaling is that these numbers can be depicted on the same scale as the class-specific probabilities for nominal variables
  - For nominal variables containing more than 2 categories, all categories are displayed simultaneously.
  - For dichotomous variables specified as nominal, by default only the last category is displayed.
  - A separate line is displayed for each cluster
  - Lowest cluster size is noted and consistency of BIC (Bayesian Information Criterion) for selected models
  - Brief description of subgroups are included for selected models
  - Used synonyms for subgroup: domain profile (DP), cluster, class
- Profiles in numbers (conditional probabilities from Latent GOLD)
- Loadings (from Latent GOLD)
- Selected profile plots in colours

Note: 'STarT' was the original abbreviation for the STart Back Tool in this project but was later changed to SBT

## Psychological domain – single-item strategy

**Profile-plots:** Results (models) with 3 to 9 domain profiles based on the following variables:

|         |                                                                                                                                                               |
|---------|---------------------------------------------------------------------------------------------------------------------------------------------------------------|
| Okon0   | On an average day, what are your possibilities of handling or controlling your pain? (0=no possibility, 10=complete control)                                  |
| Okom0   | How big is the chance of you being recovered within 3 months? (0=high chance, 1=Little or no chance)                                                          |
| Oens0   | To what extent do you feel socially isolated? (0=not at all isolated, 1=little to quite isolated)                                                             |
| Obeh0   | How well do you agree: Treatment is crucial to reduce my pain? (0=fully agree, 10=fully disagree)                                                             |
| Start50 | It's not really safe for a person with a condition like mine to be physically active (0=disagree, 1=agree)                                                    |
| Start60 | Worrying thoughts have been going through my mind a lot of the time (0=disagree, 1=agree)                                                                     |
| Start70 | I feel that my back pain is terrible and it's never going to get any better (0=disagree, 1=agree)                                                             |
| Start80 | In general I have not enjoyed all the things I used to enjoy(0=disagree, 1=agree)                                                                             |
| Rm150   | I sleep less well because of my back problem. (0=disagree, 1=agree)                                                                                           |
| Rm170   | Because of my back problem, I am more irritable and bad tempered with people than usual (0=no, 1=yes)                                                         |
| Rm210   | I keep rubbing or holding areas of my body that hurt or are uncomfortable (0=no, 1=yes)                                                                       |
| Rm230   | I often express concern to other people over what might be happening to my health (0=no, 1=yes)                                                               |
| Fabq30  | Physical activity might harm my back (0=disagree, 3=don't know, 6=agree)                                                                                      |
| Fabq40  | I should not do physical activities which (might) make my pain worse (0=disagree, 3=don't know, 6=agree)                                                      |
| Fabq110 | My work might harm my back (0=disagree, 3=don't know, 6=agree)                                                                                                |
| Fabq120 | I should not do my normal work with my present pain (0=disagree, 3=don't know, 6=agree)                                                                       |
| Fabq140 | I cannot do my normal work till my pain is treated (0=disagree, 3=don't know, 6=agree)                                                                        |
| Mdi1    | Have you felt low in spirits or sad? (0=at no time, 1=some of the time, 2=slightly-all the time)                                                              |
| mdi2    | Have you lost interest in your daily activities?(0=at no time, 1=some of the time, 2=slightly-all the time)                                                   |
| Mdi3    | Have you felt lacking in energy and strength? (0=at no time, 5=all the time)                                                                                  |
| Mdi4    | Have you felt less self-confident? (0=at no time, 1=some of the time, 2=slightly-all the time)                                                                |
| Mdi5    | Have you had a bad conscience or feelings of guilt? (0=at no time, 1=some of the time, 2=slightly-all the time)                                               |
| Mdi7    | Have you had difficulty in concentrating, e.g. when reading the newspaper or watching television? (0=at no time, 1=some of the time, 2=slightly-all the time) |
| Mdi8    | Have you felt very restless/subdued or slowed down? (0=at no time, 1=some of the time, 2=slightly-all the time)                                               |
| Mdi9    | Have you had trouble sleeping at night? (0=at no time, 5=all the time)                                                                                        |
| Mdi10   | Have you suffered from reduced/increasd appetite? (0=at no time, 1=some of the time, 2=slightly-all the time)                                                 |

### Psychology domain, single-item strategy, 3-domain profiles

Cluster 1: not lonely, treatment might help, no worrying thoughts, have enjoyed usual things, usual temper, not depressed though a little restless

Cluster 2: Might recover, a little lonely, treatment might help, do have worrying thoughts, have not enjoyed things as usual, bad temper/more irritable, moderately depressed

Cluster 3: As cluster 1, apart from: treatment is crucial, sleep is more disturbed and more work-related considerations

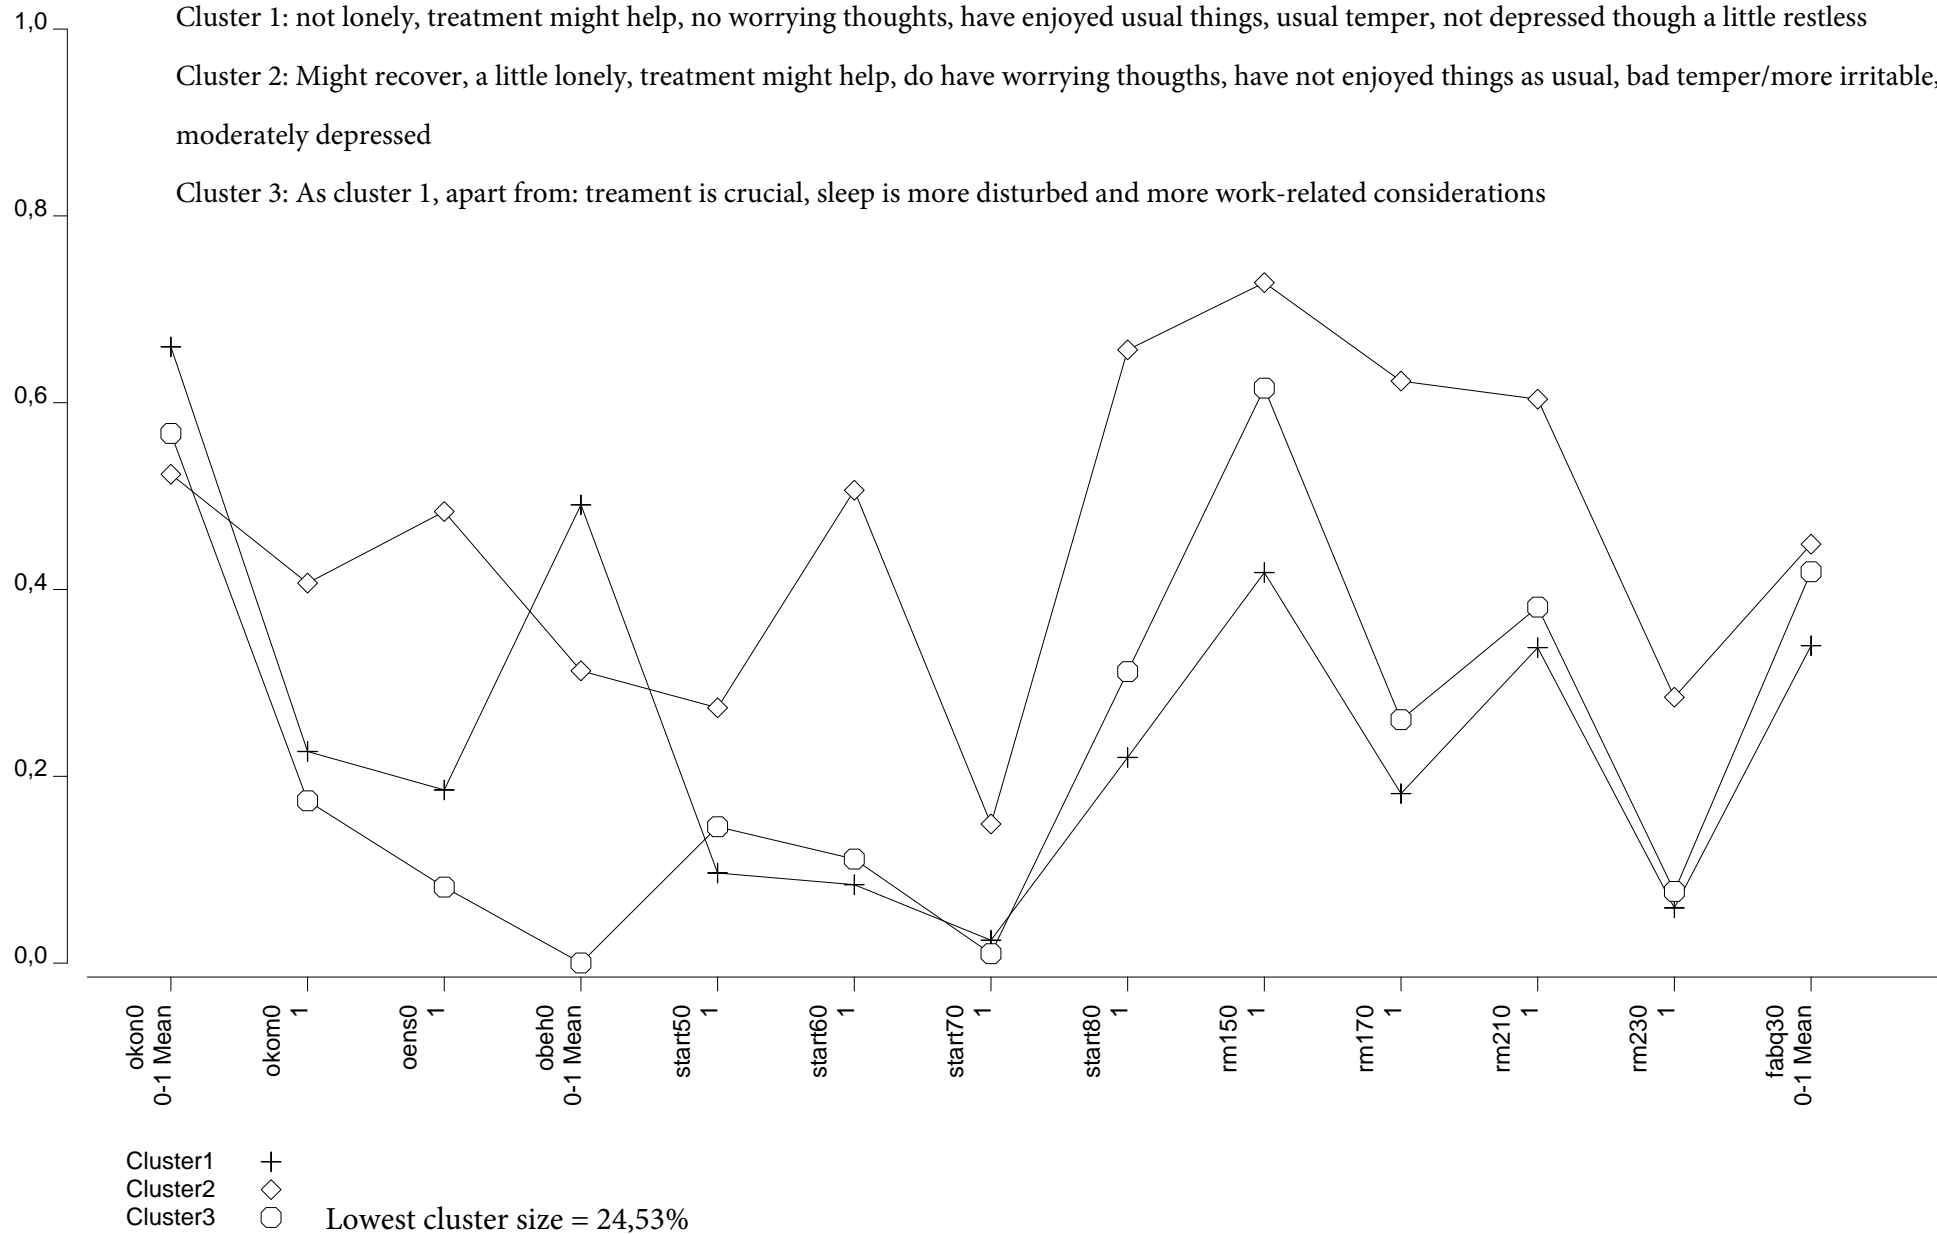

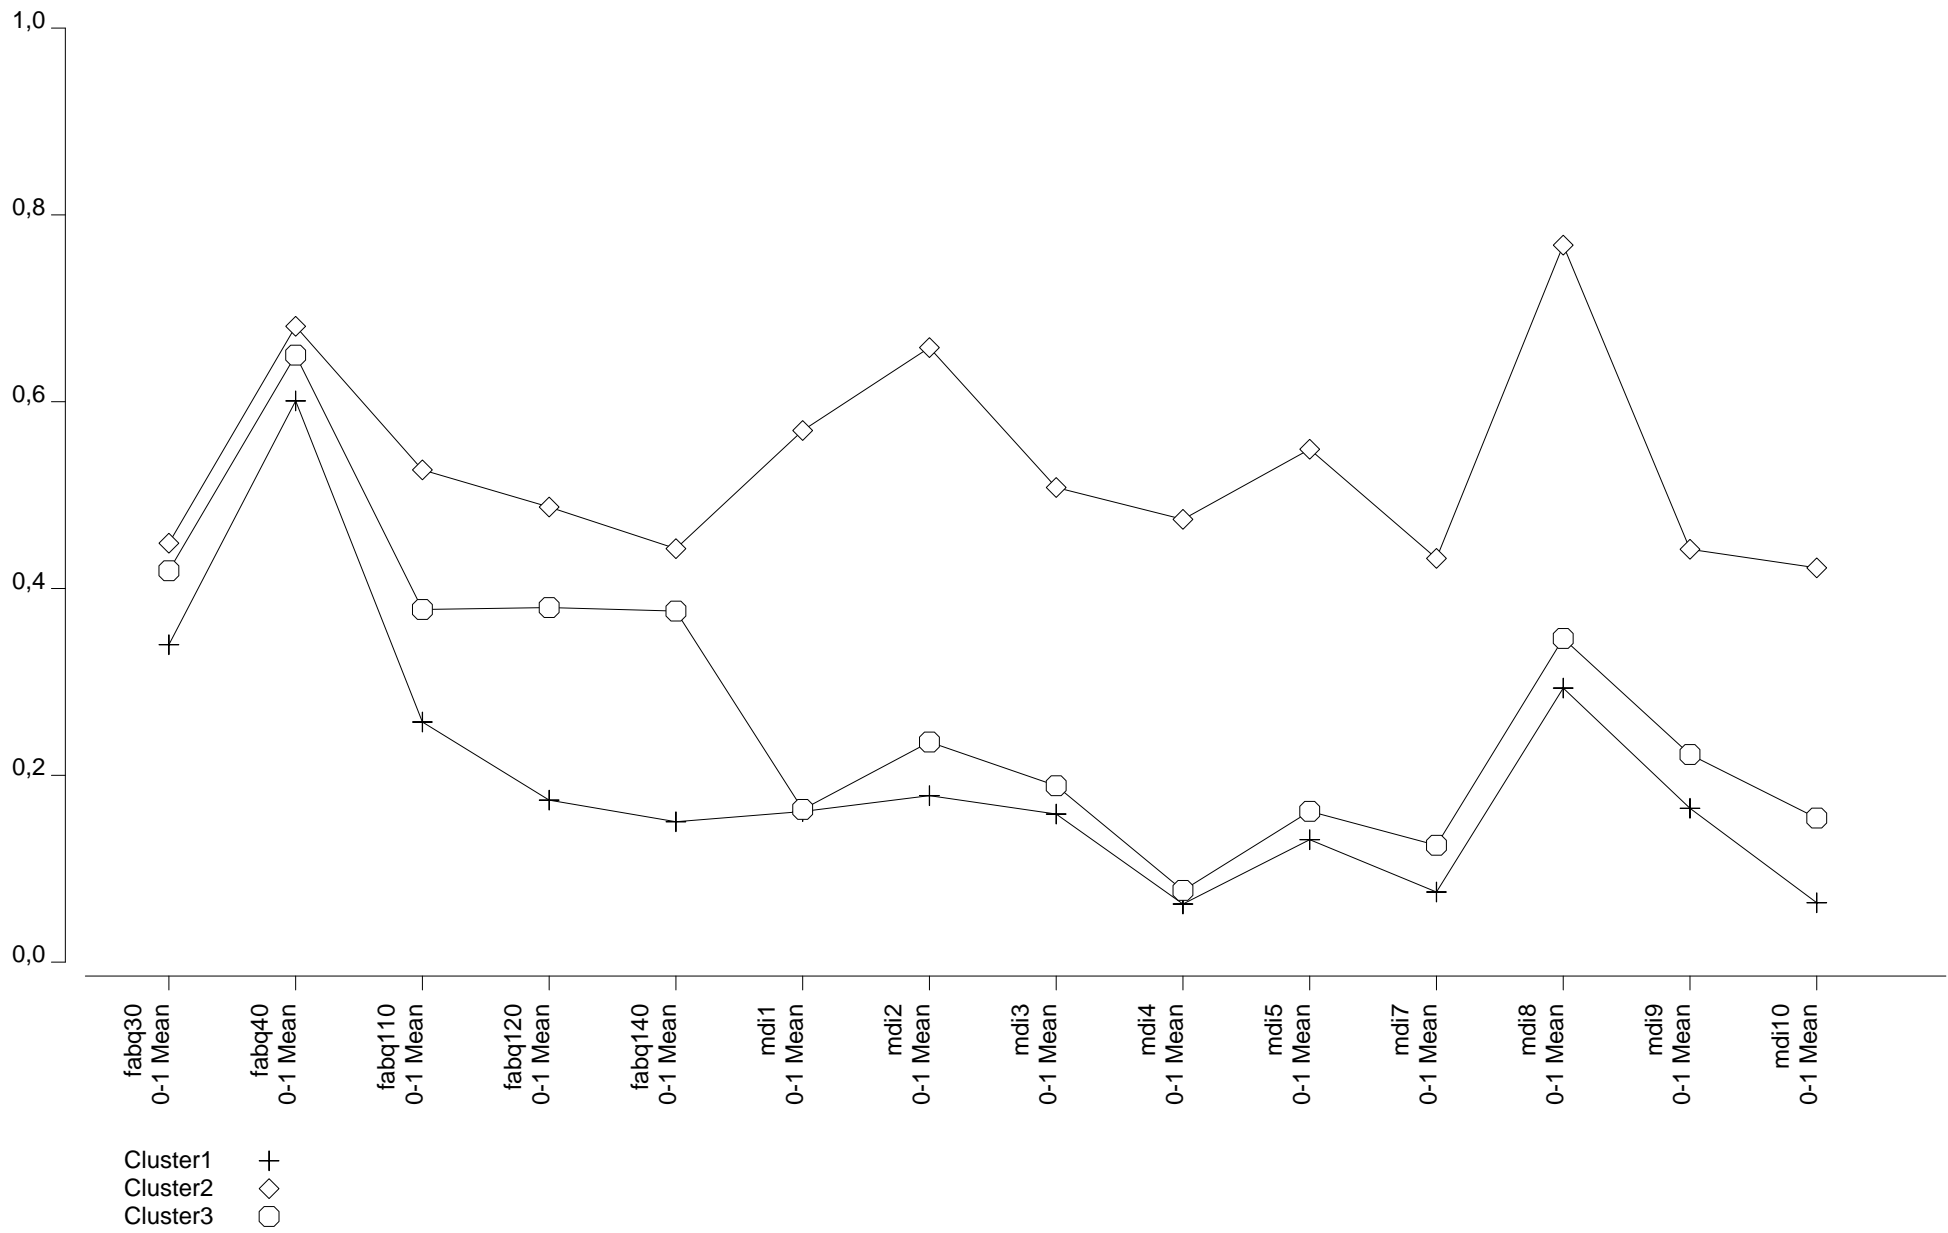

Psychology domain, single-item strategy, 4-domain profiles

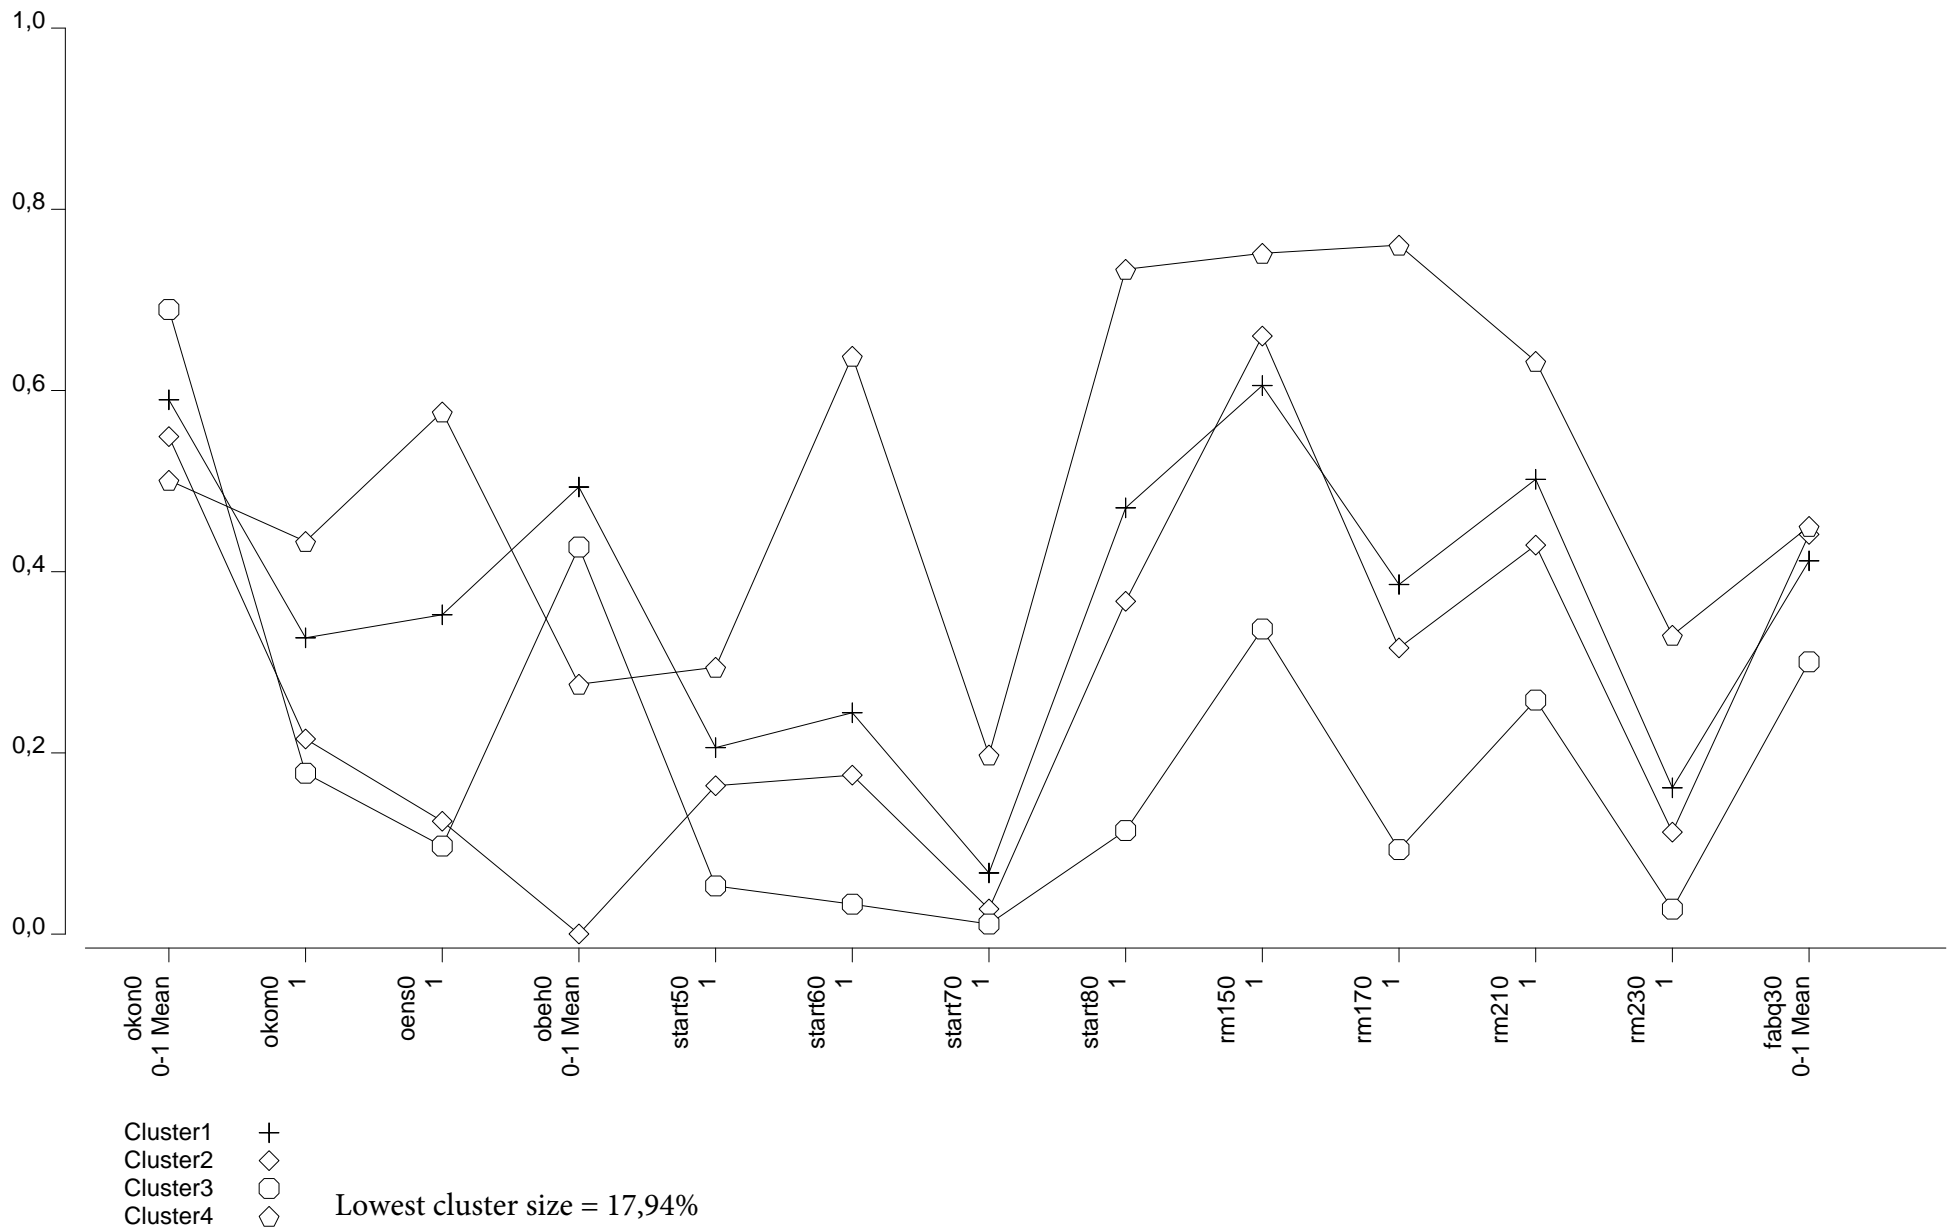

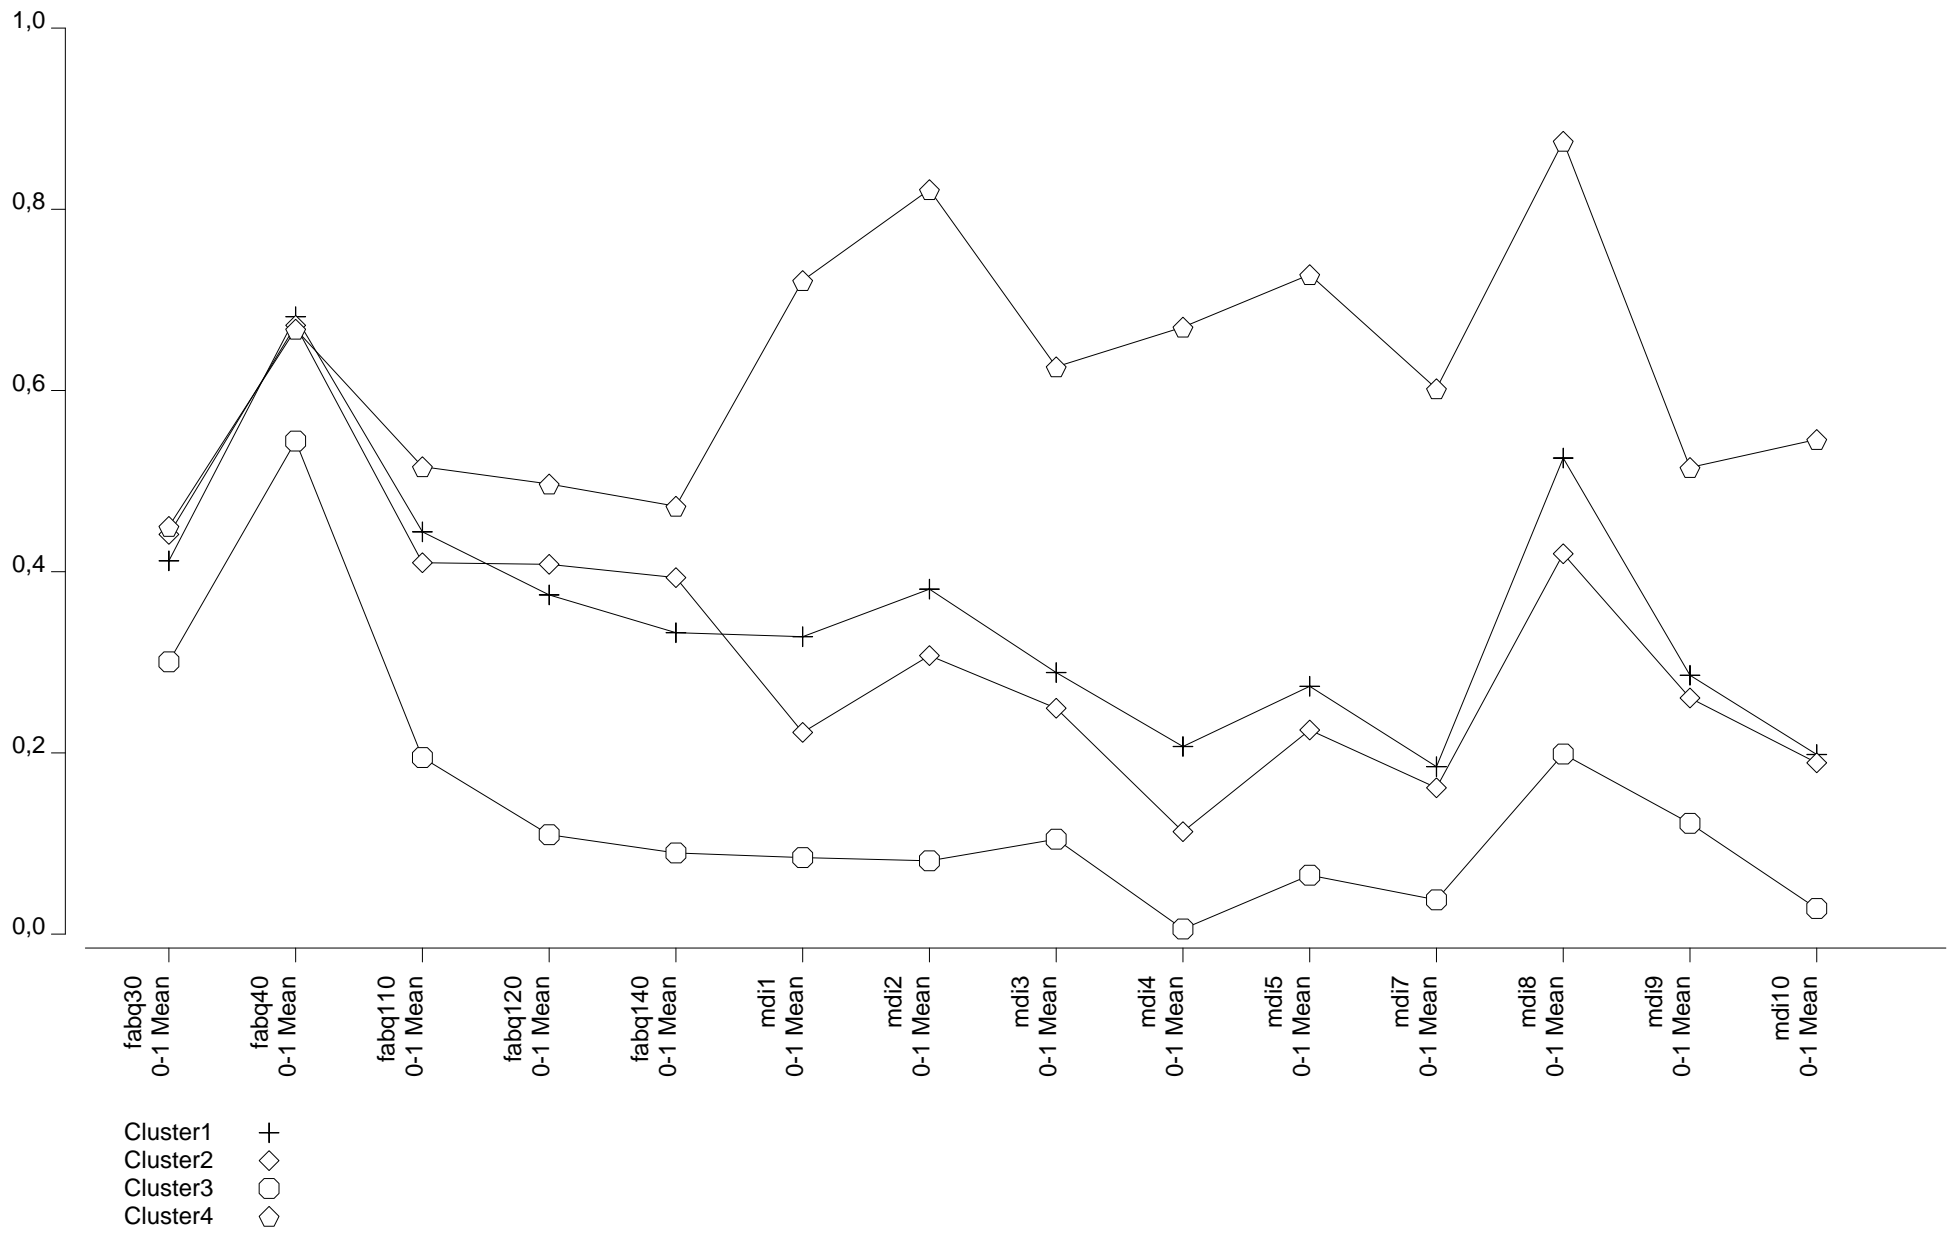

Psychology domain, single-item strategy, 5-domain profiles

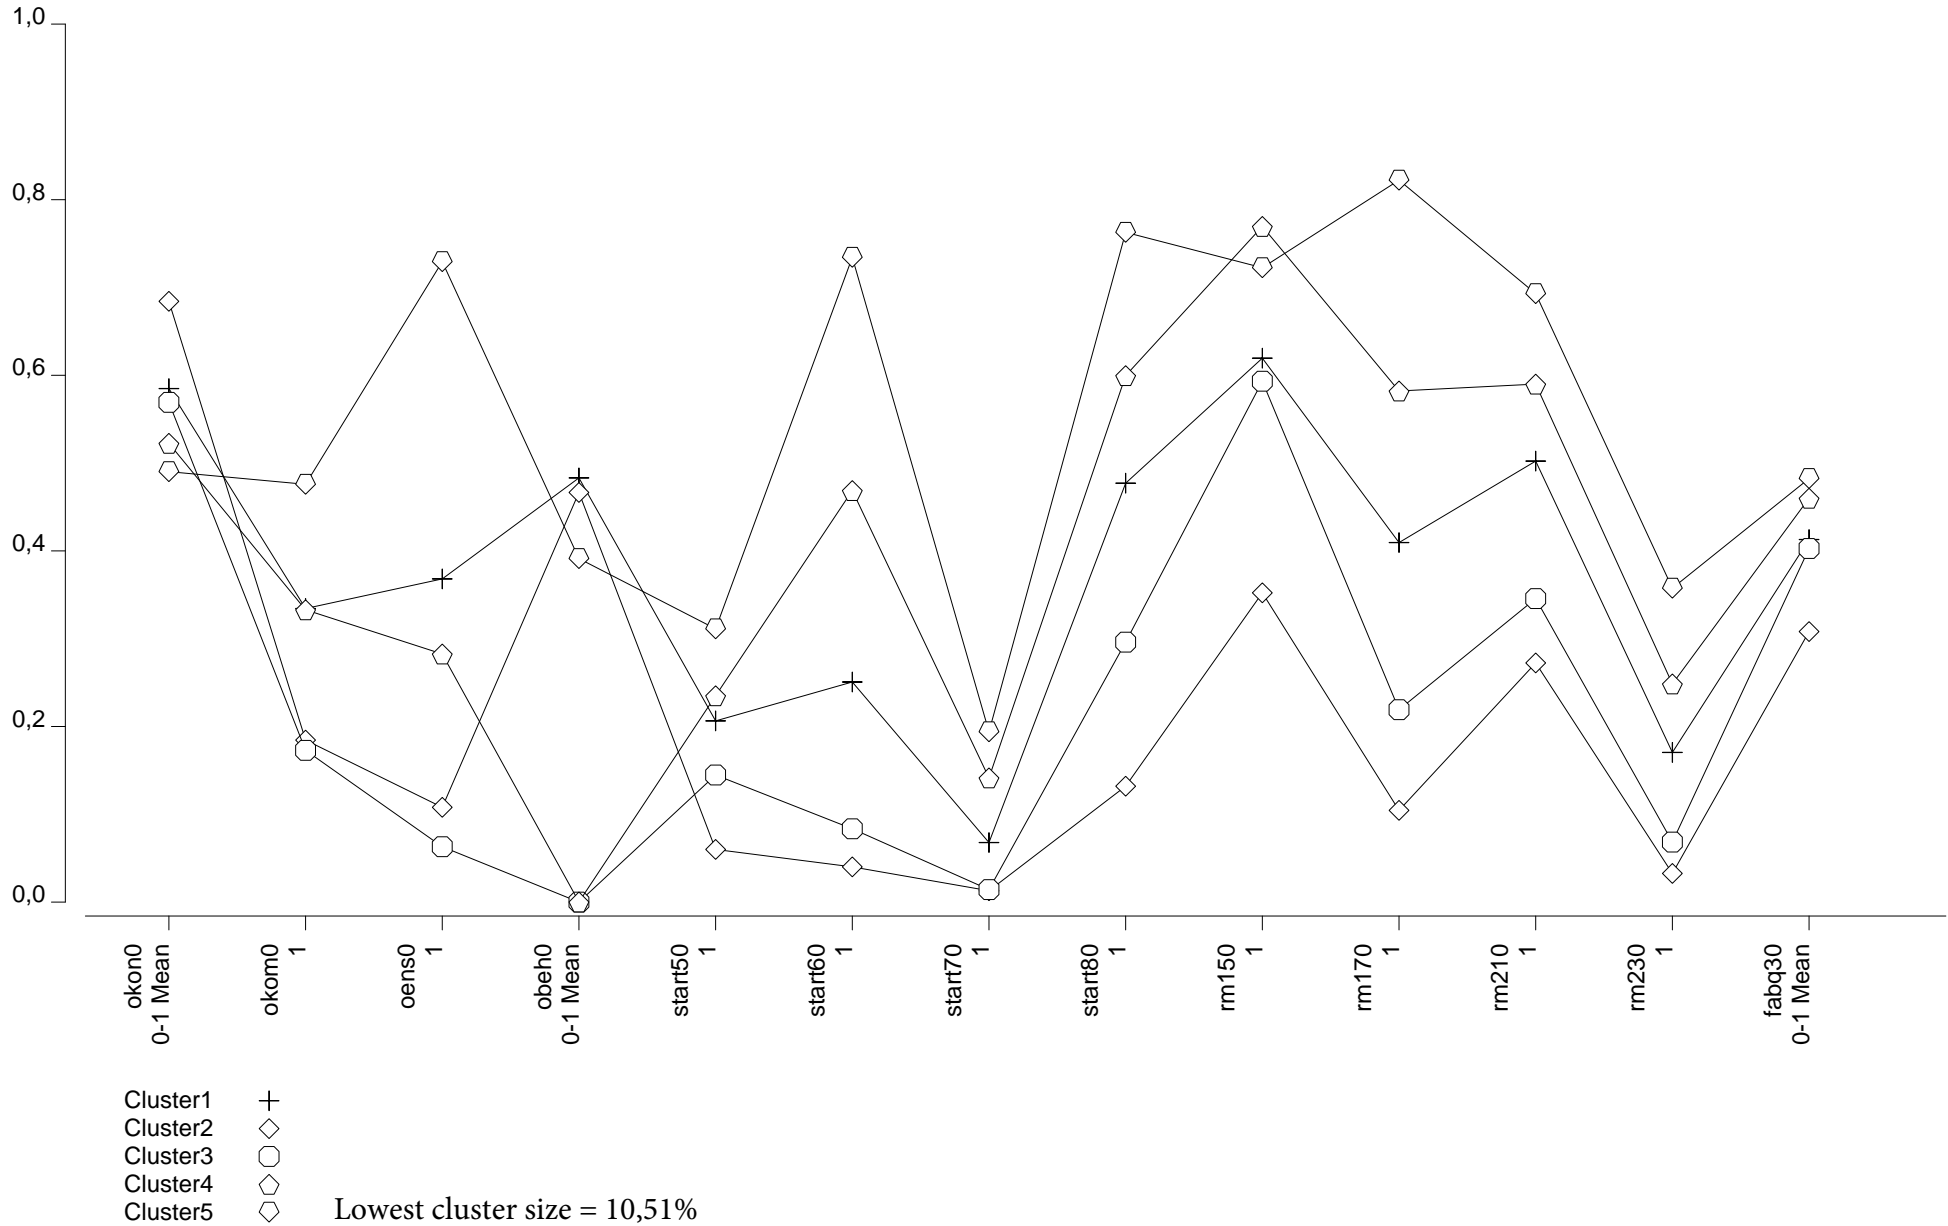

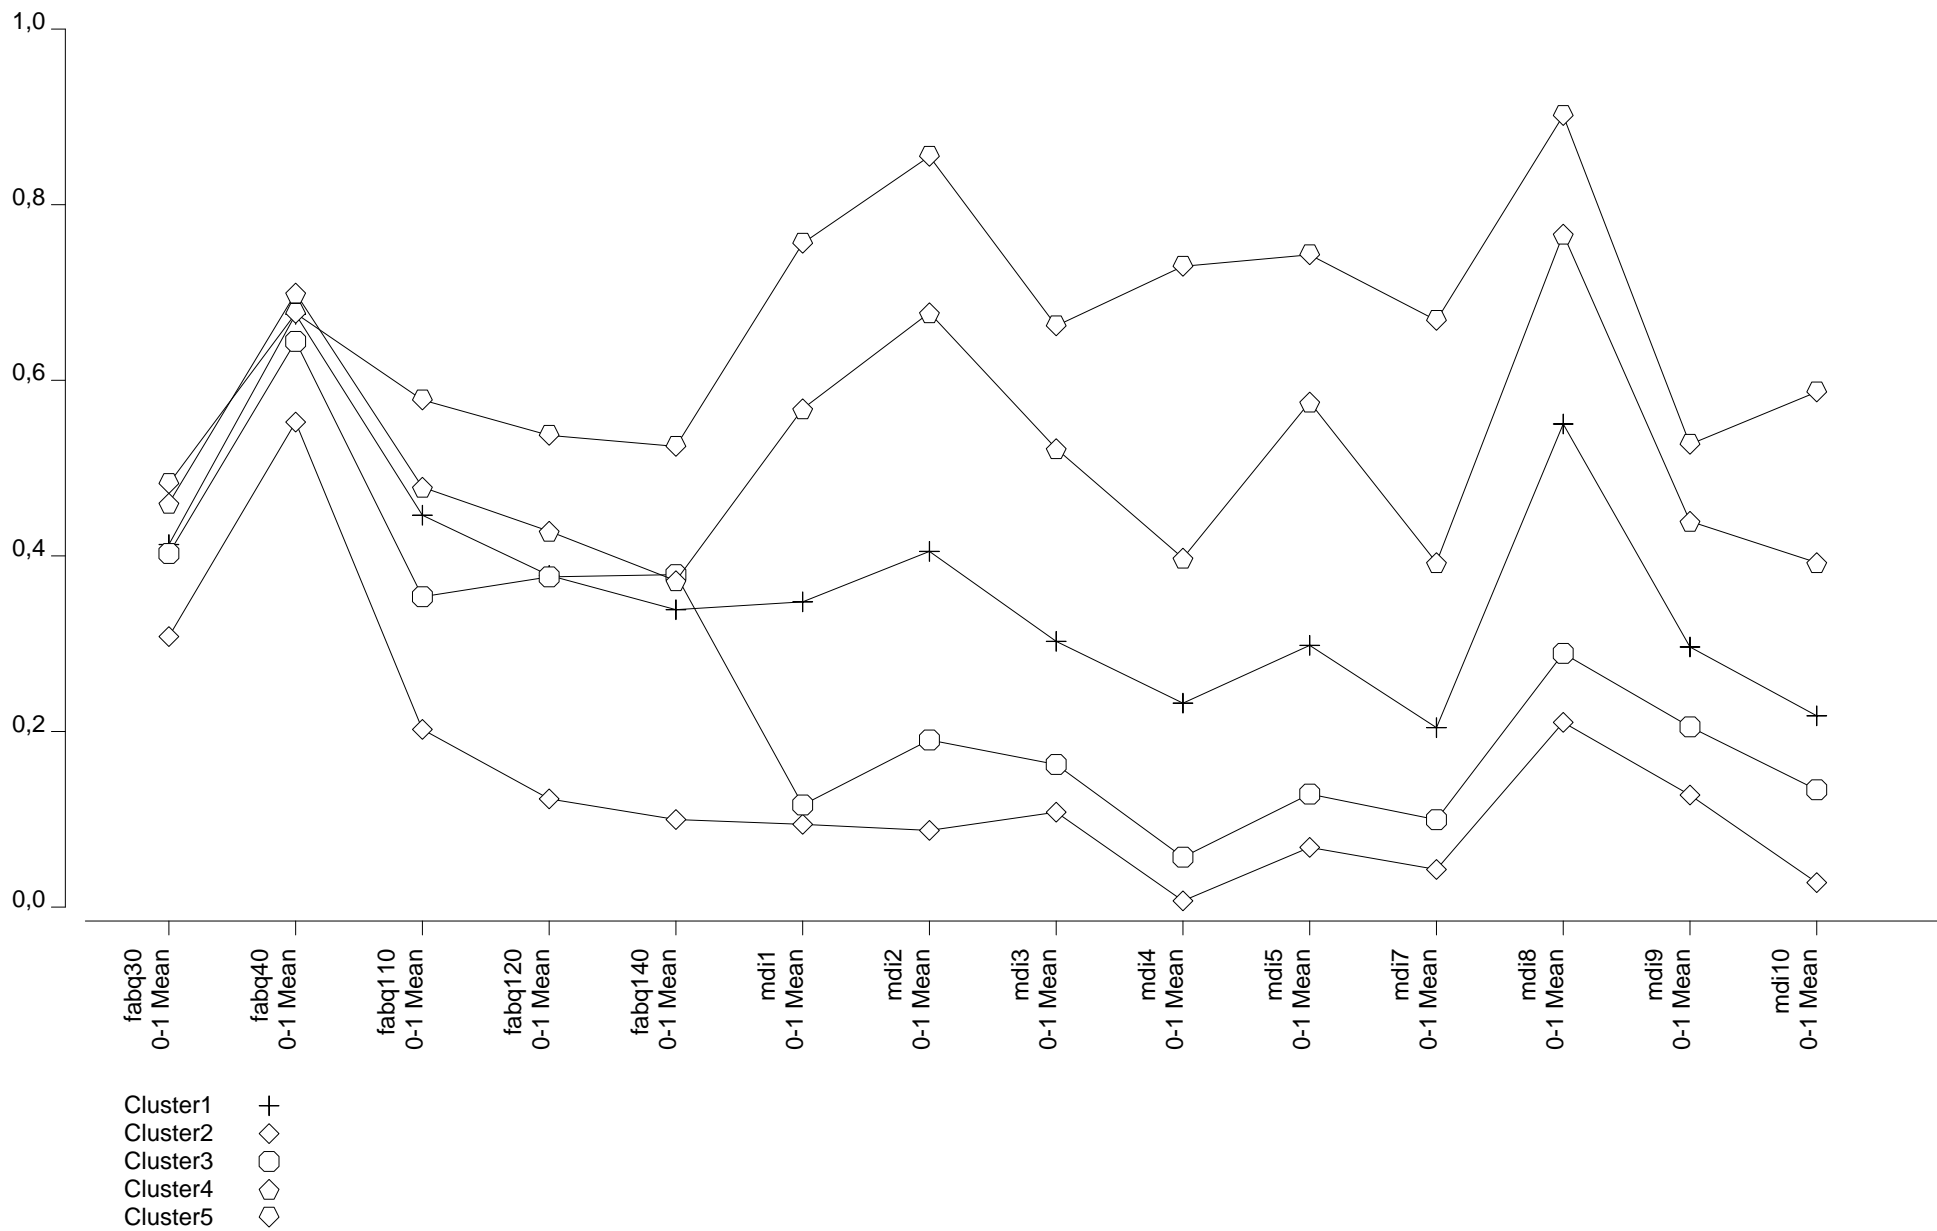



Psychology domain, single-item strategy, 6-domain profiles

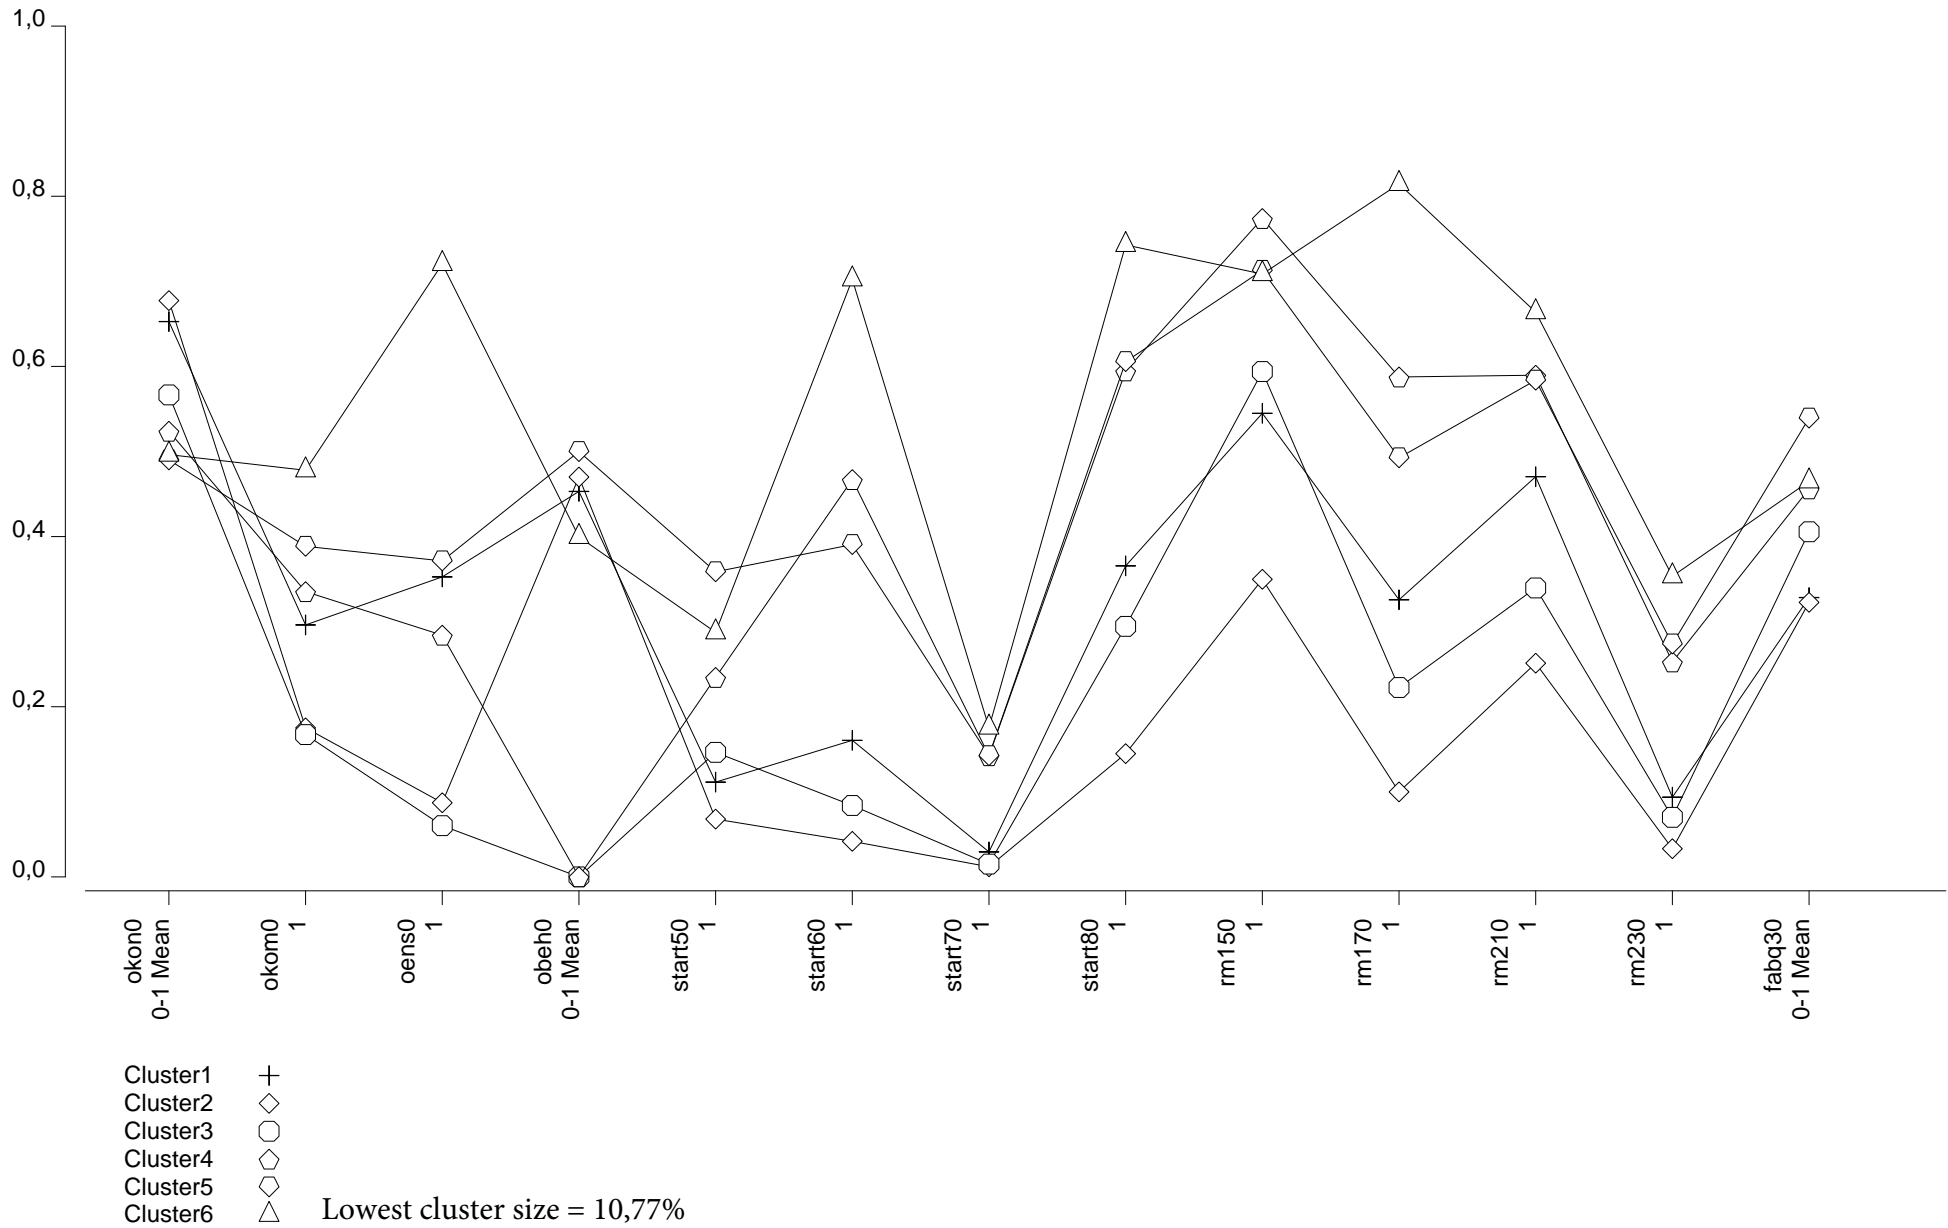

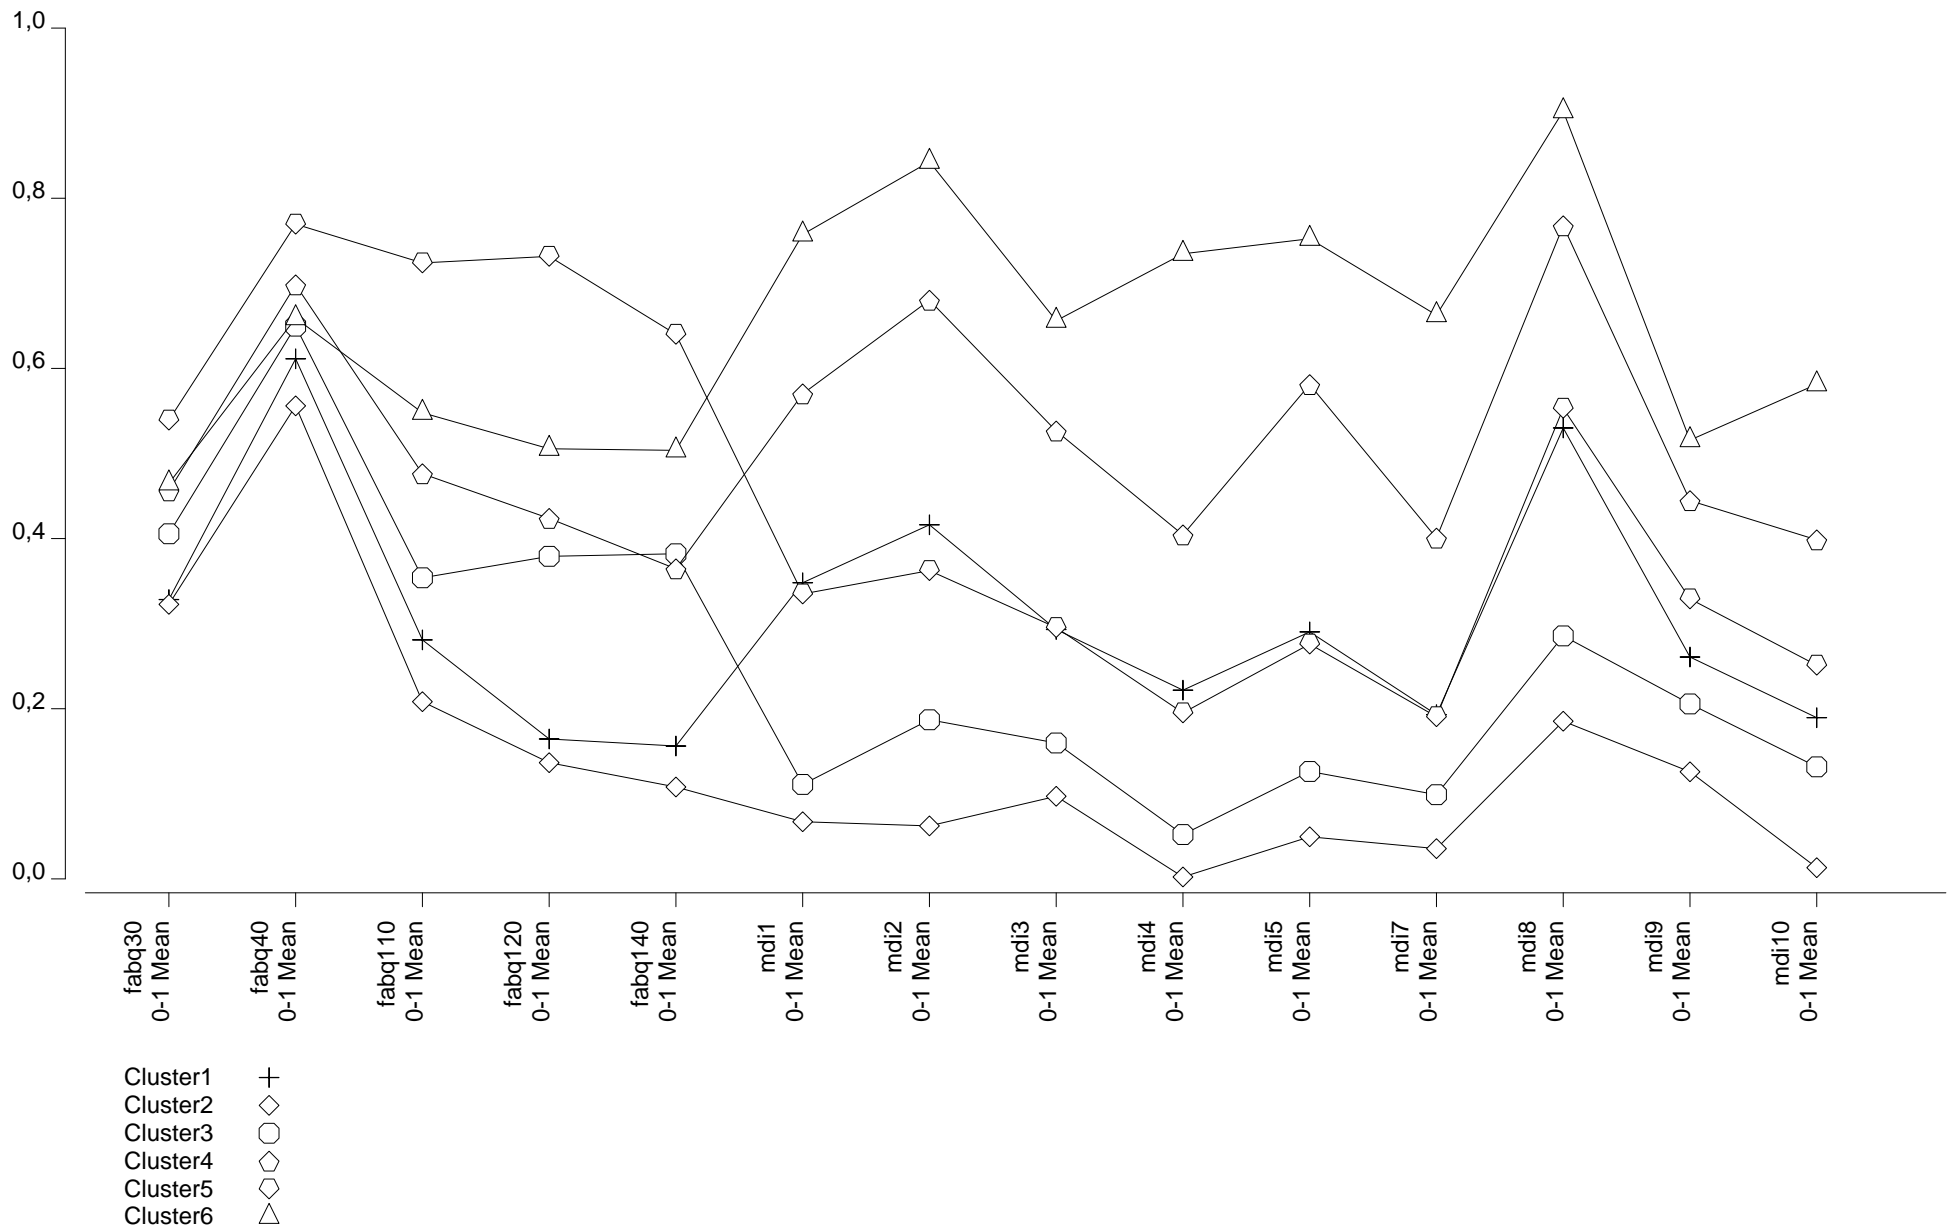

Psychology domain, single-item strategy, 7-domain profiles

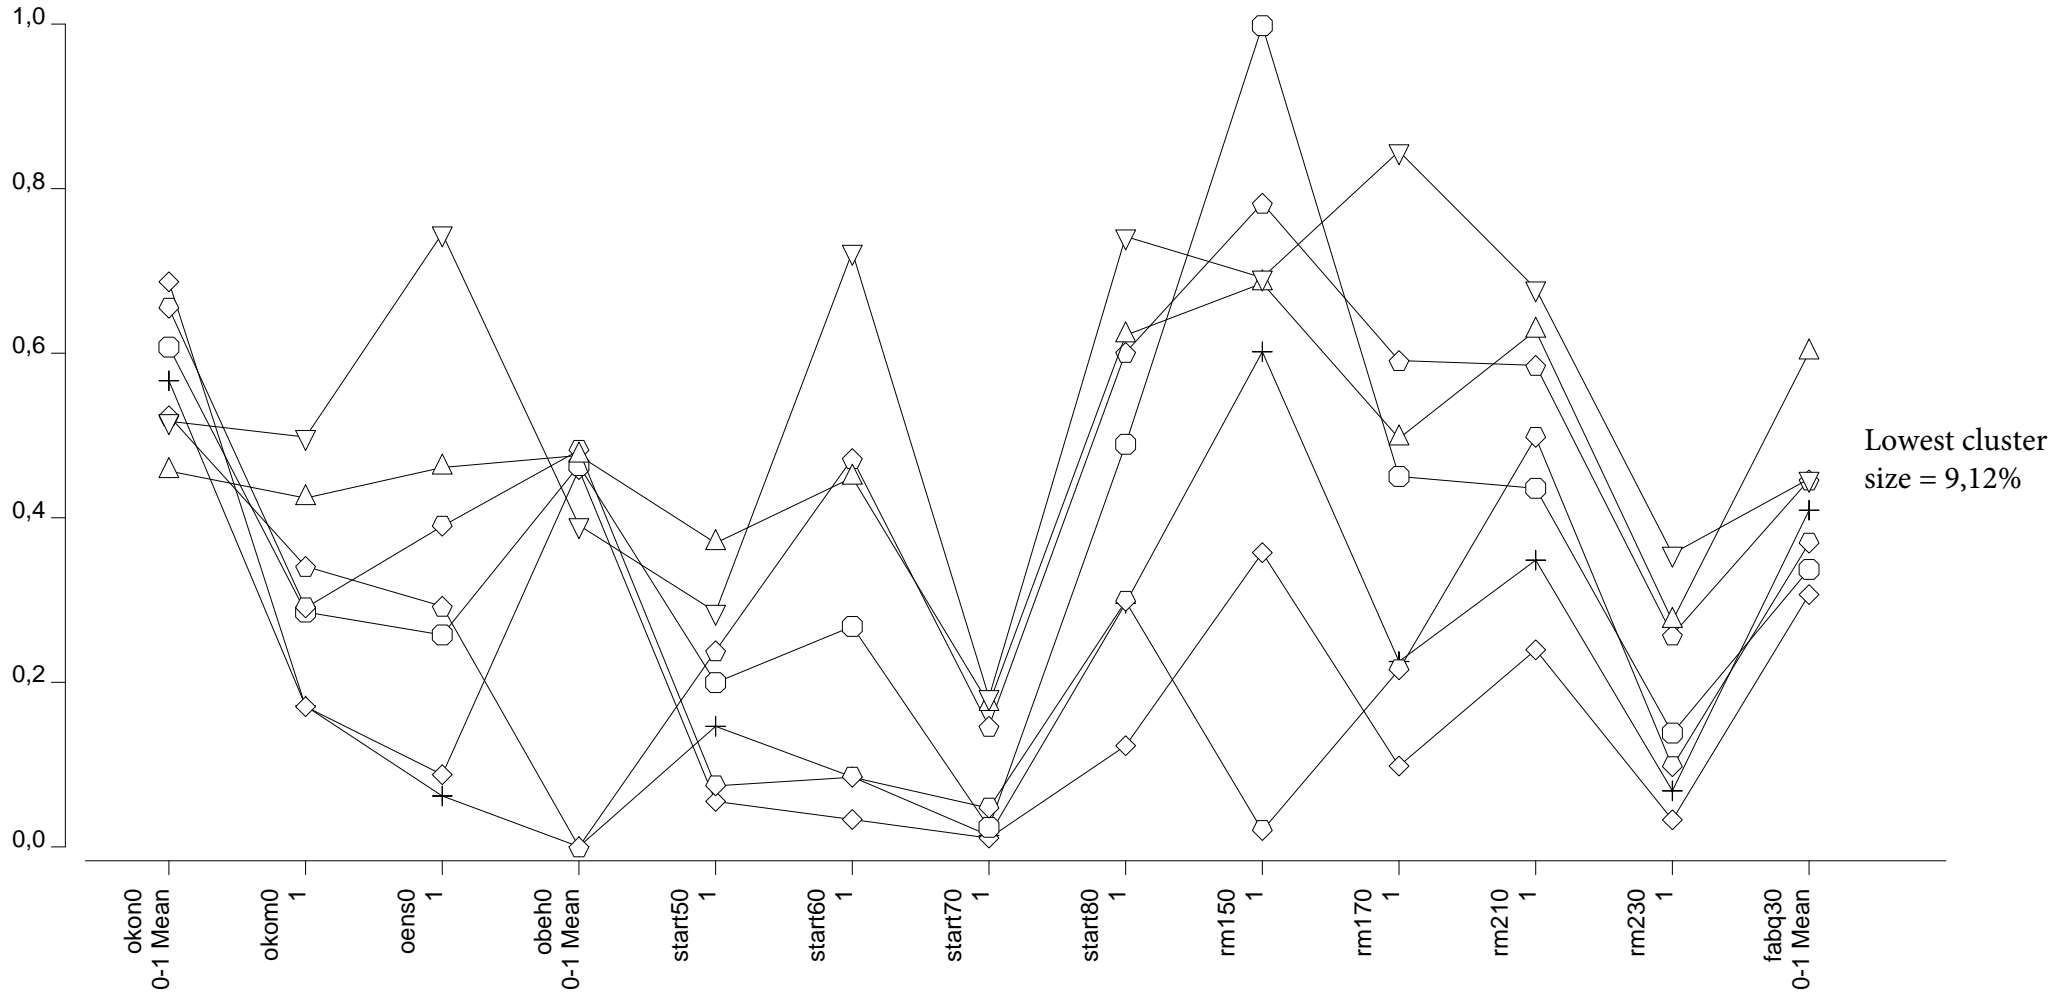

- Cluster1 + Cluster 1: Treatment is very crucial, sometimes sleep less well, don't know if work is good or bad, very seldom depressed
- Cluster2 ◇ Cluster 2: Seldom sleep less well, very seldom cannot work, depressed or worried
- Cluster3 ○ Cluster 3: Very often sleep less well, seldom cannot work or depressed
- Cluster4 ◇ Cluster 4: Treatment is very crucial, often sleep less well, don't know if work is good or bad, sometimes depressed
- Cluster5 ◇ Cluster 5: Sleep very well, seldom cannot work or depressed
- Cluster6 △ Cluster 6: Often sleep less well, very often cannot do physical activity/work, seldom depressed
- Cluster7 ▽ Cluster 7: Often lonely, worried and depressed, often sleep less well, don't know if work is good or bad

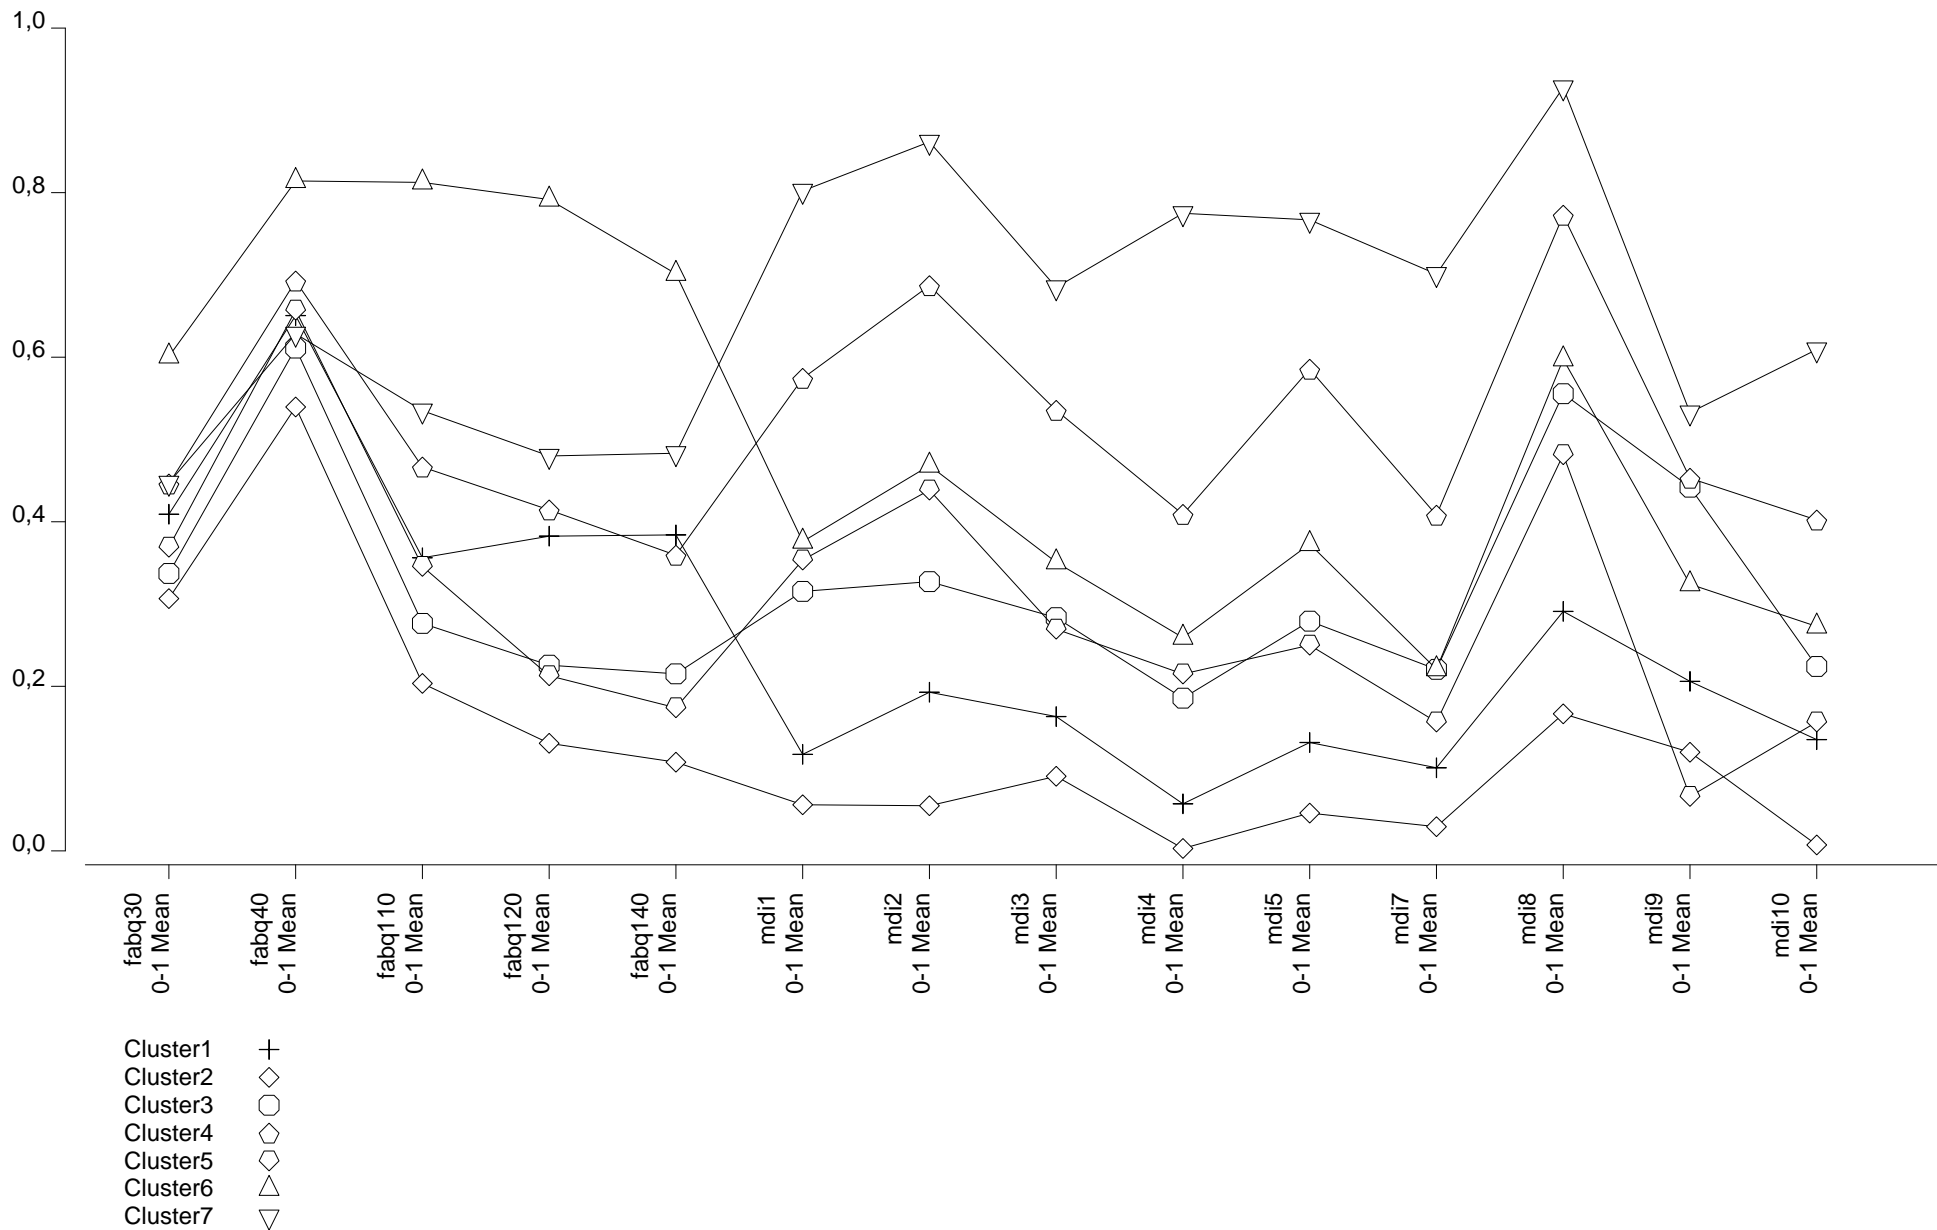

Psychology domain, single-item strategy, 8-domain profiles -

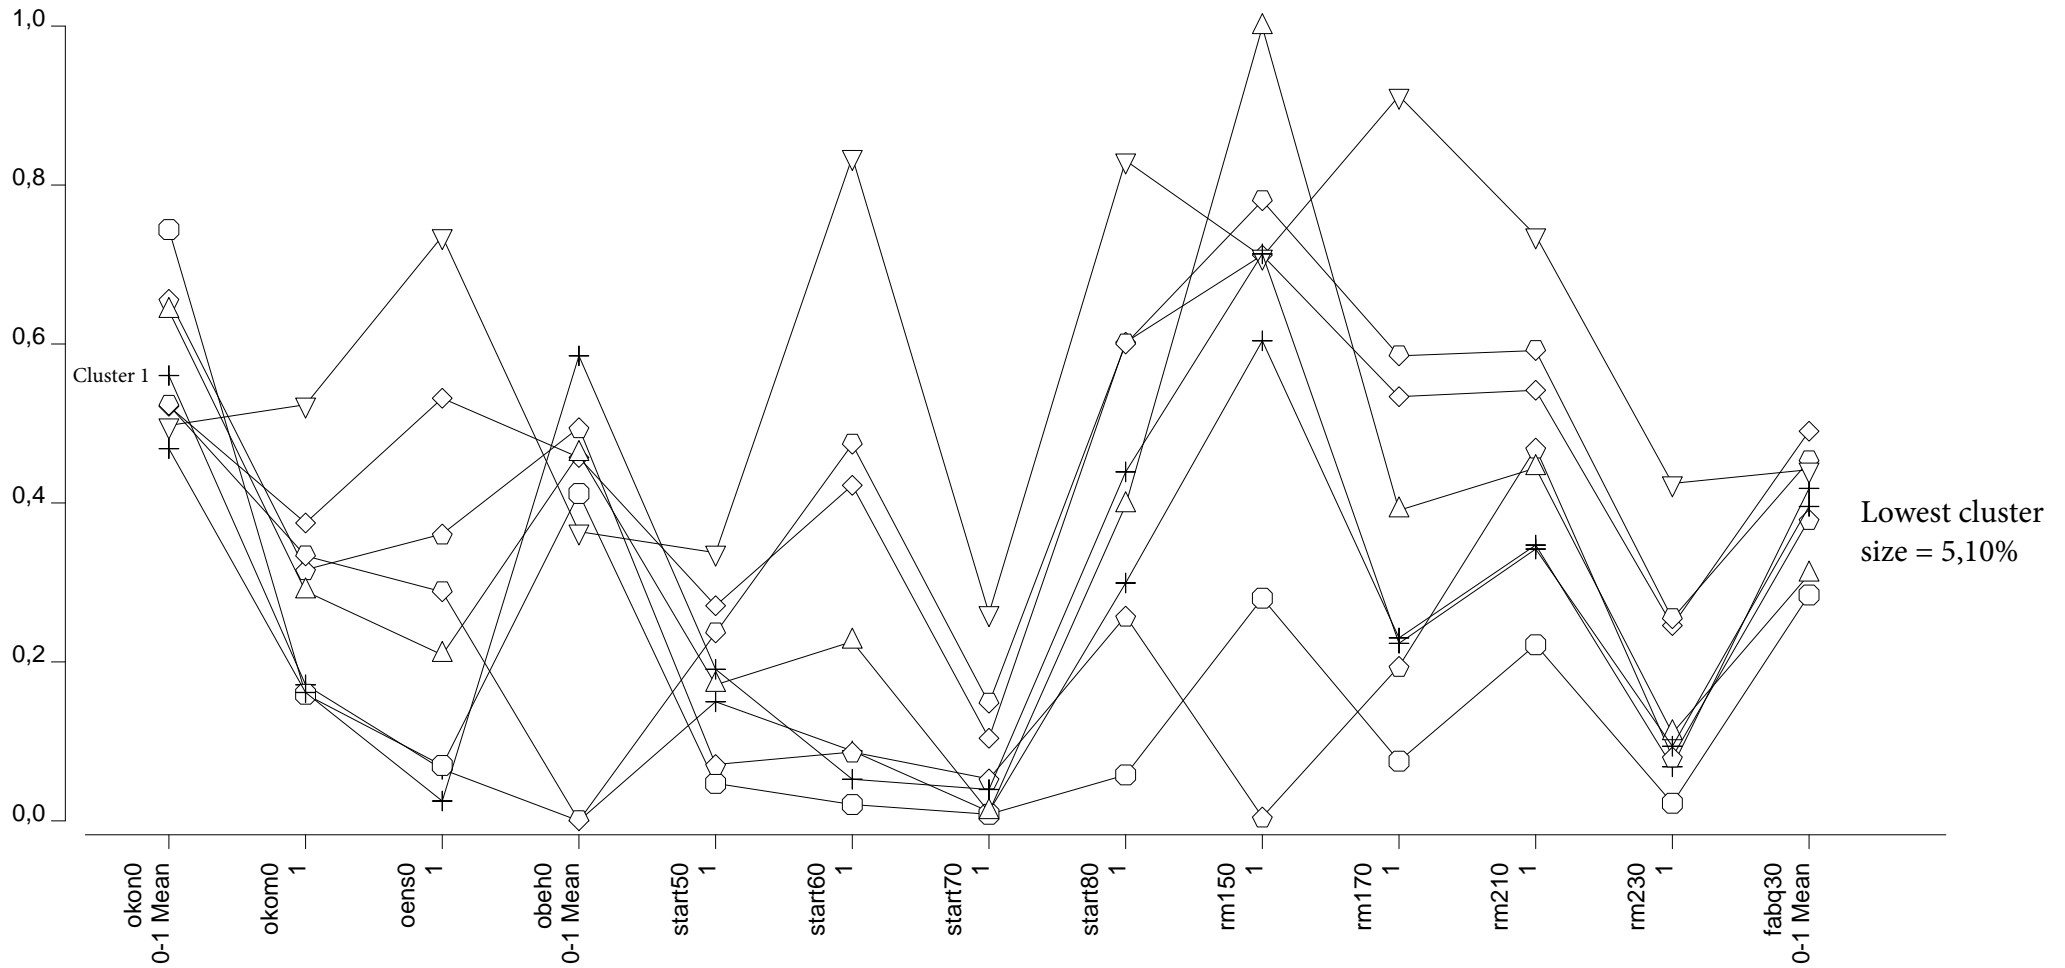

- Cluster1 + Cluster 1: Treatment is very crucial, sometimes sleep less well, don't know if work is good or bad, very seldom depressed
- Cluster2 ◇ Cluster 2: Often sleep less well, often cannot do physical activity/work, sometimes depressed
- Cluster3 ○ Cluster 3: Seldom sleep less well, very seldom cannot work, depressed or worried
- Cluster4 ◊ Cluster 4: Sleep very well, seldom cannot work or depressed
- Cluster5 ◈ Cluster 5: Treatment is very crucial, often sleep less well, don't know if work is good or bad, sometimes depressed
- Cluster6 ▲ Cluster 6: Very often sleep less well, very seldom cannot work, seldom depressed
- Cluster7 ▼ Cluster 7: Often lonely, very often worried and depressed, often sleep less well, don't know if work is good or bad
- Cluster8 + Cluster 8: Treatment is seldom crucial to reduce pain, often sleep less well and cannot work, very seldom depressed or worried

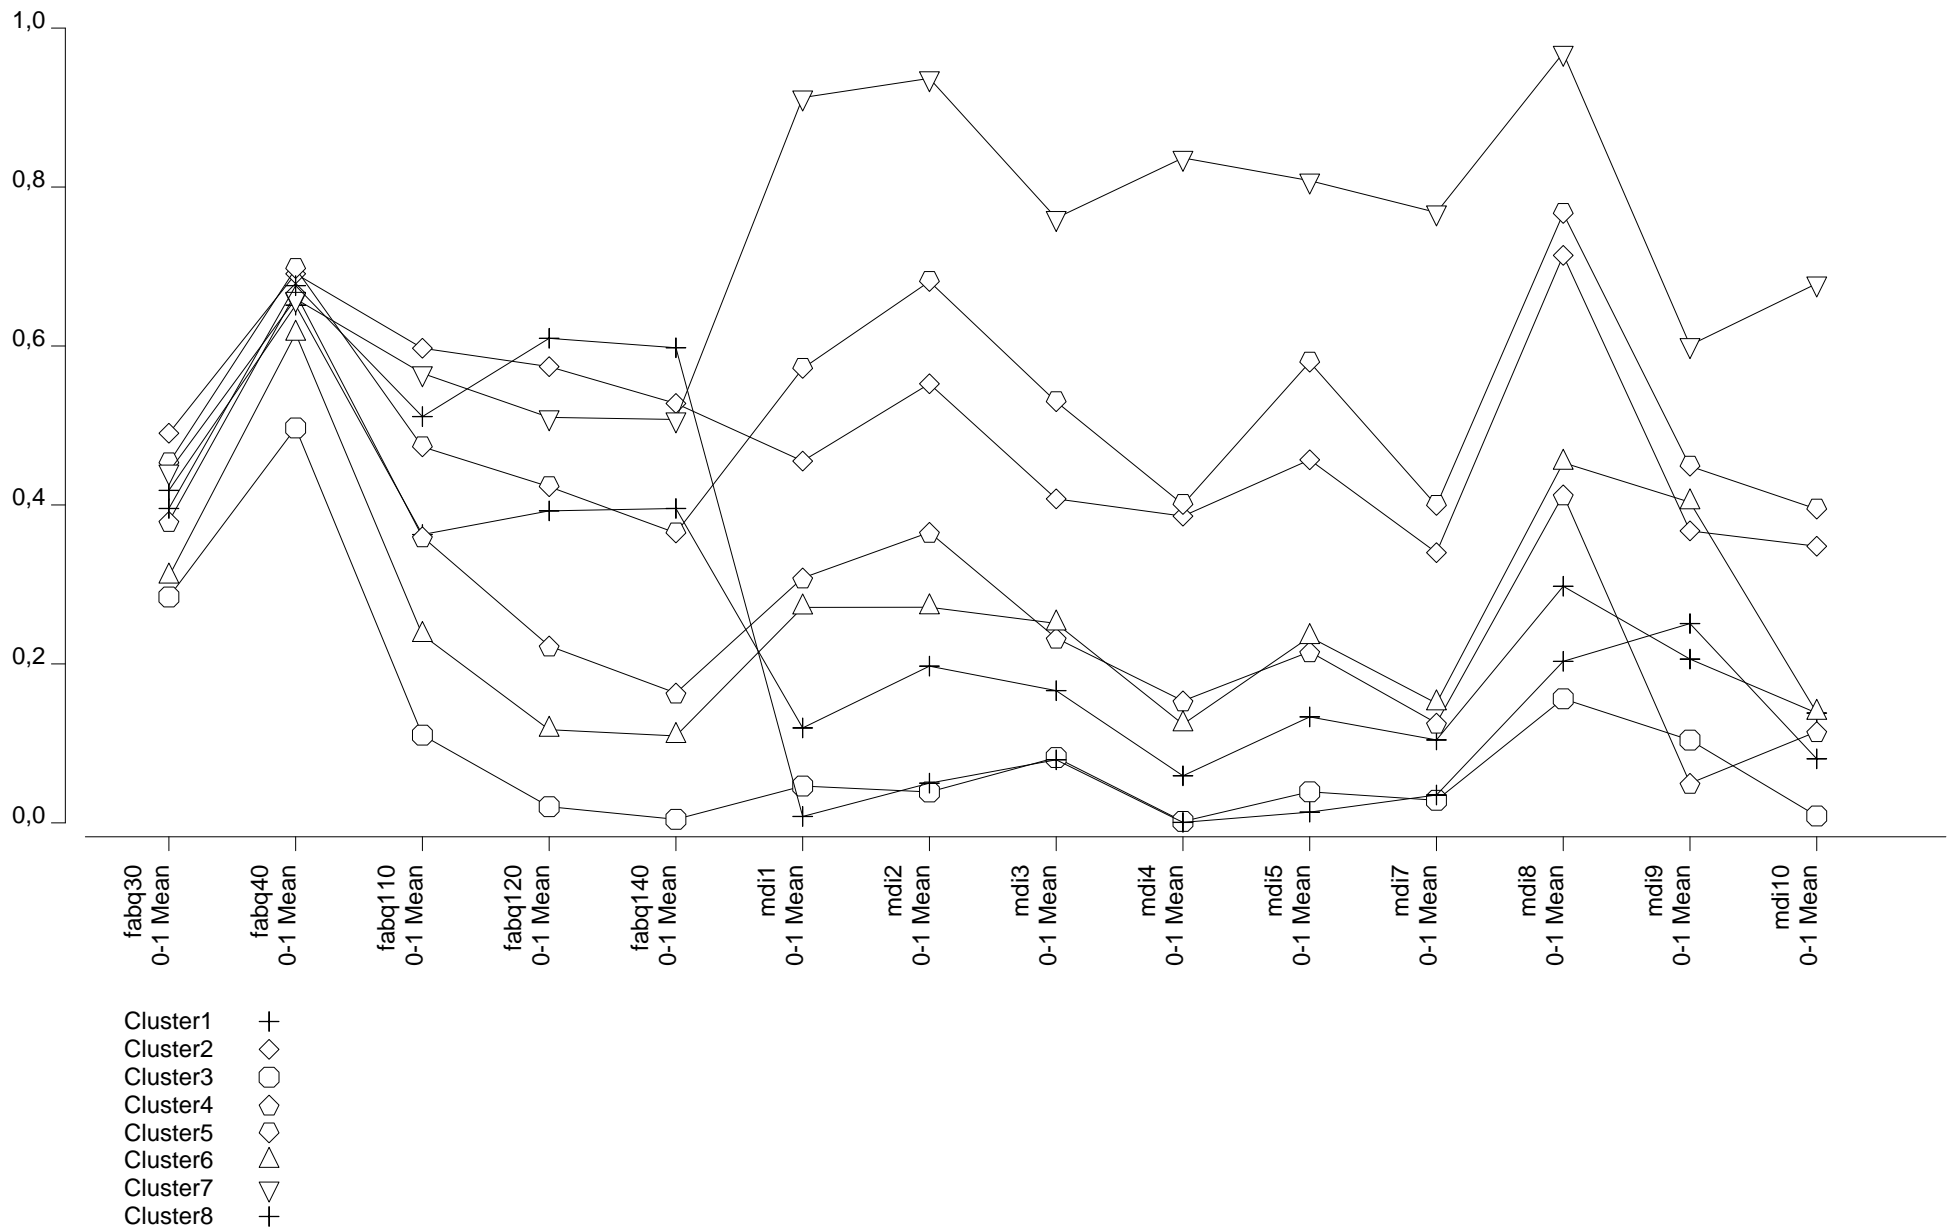

Psychology domain, single-item strategy, 9-domain profiles

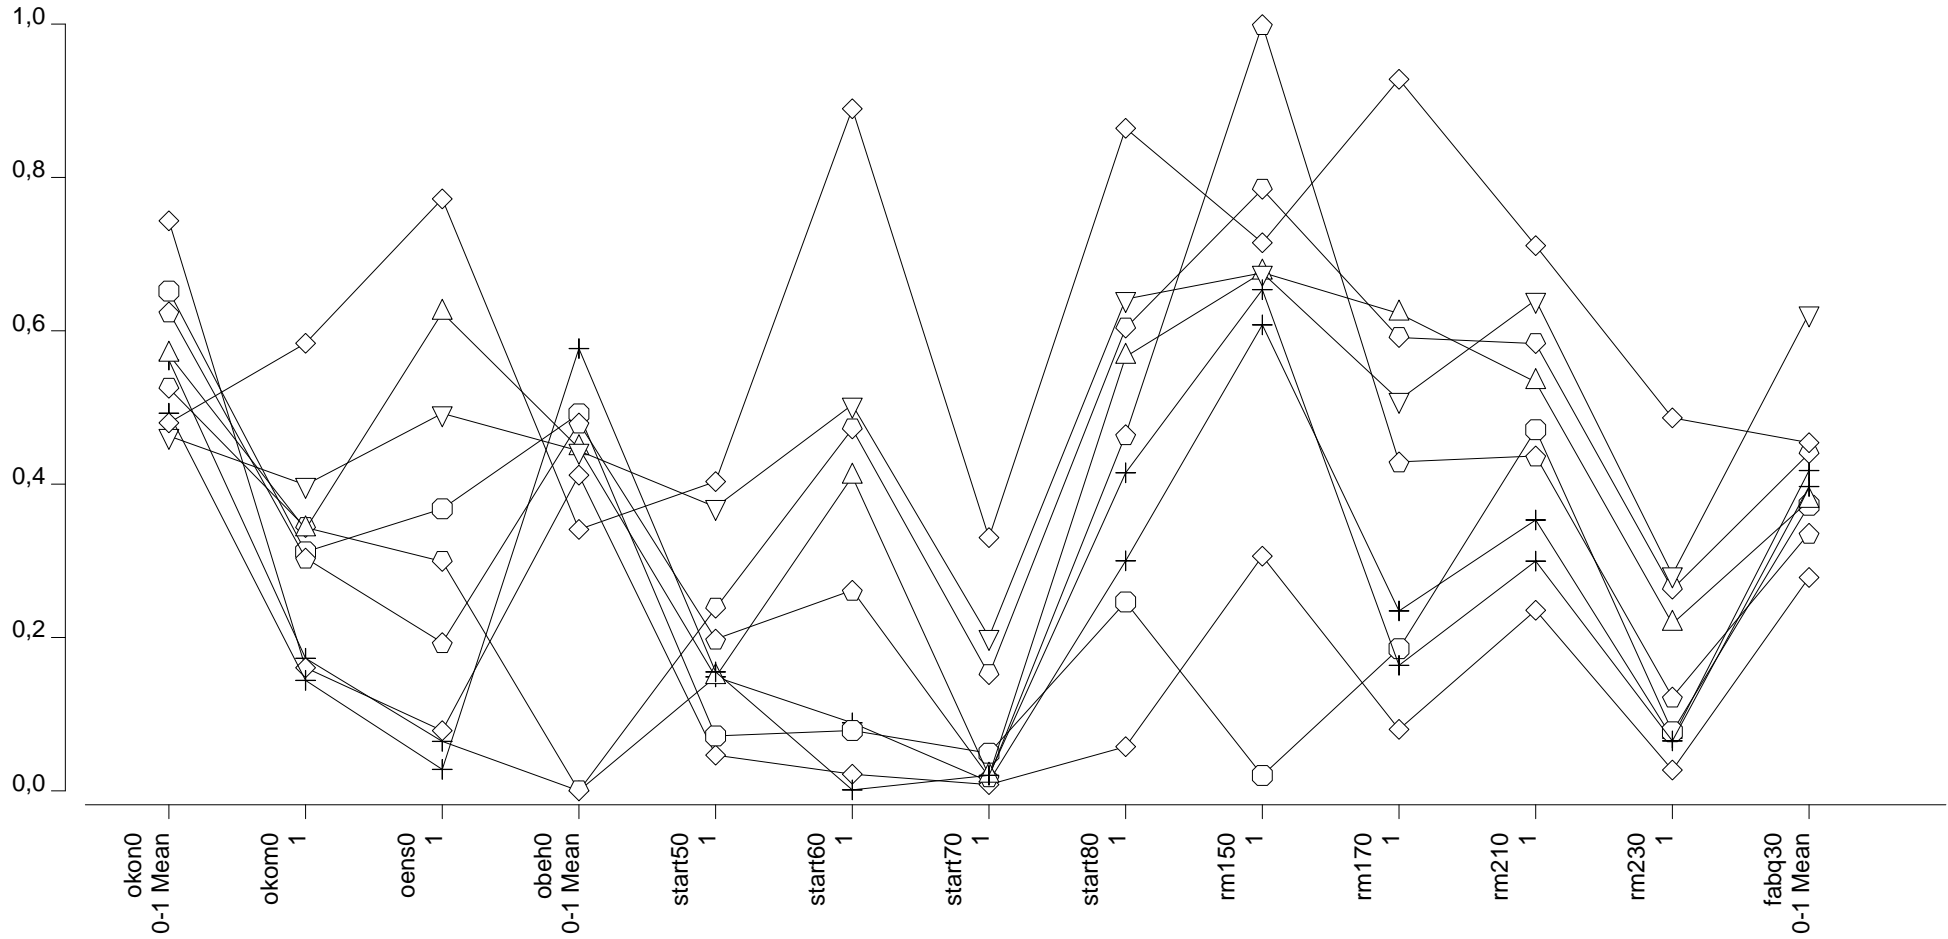

- Cluster1 +
  - Cluster2 ◇
  - Cluster3 ○
  - Cluster4 ◇
  - Cluster5 ◇
  - Cluster6 △
  - Cluster7 ▽
  - Cluster8 +
  - Cluster9 ◇
- Lowest cluster size = 4,60%

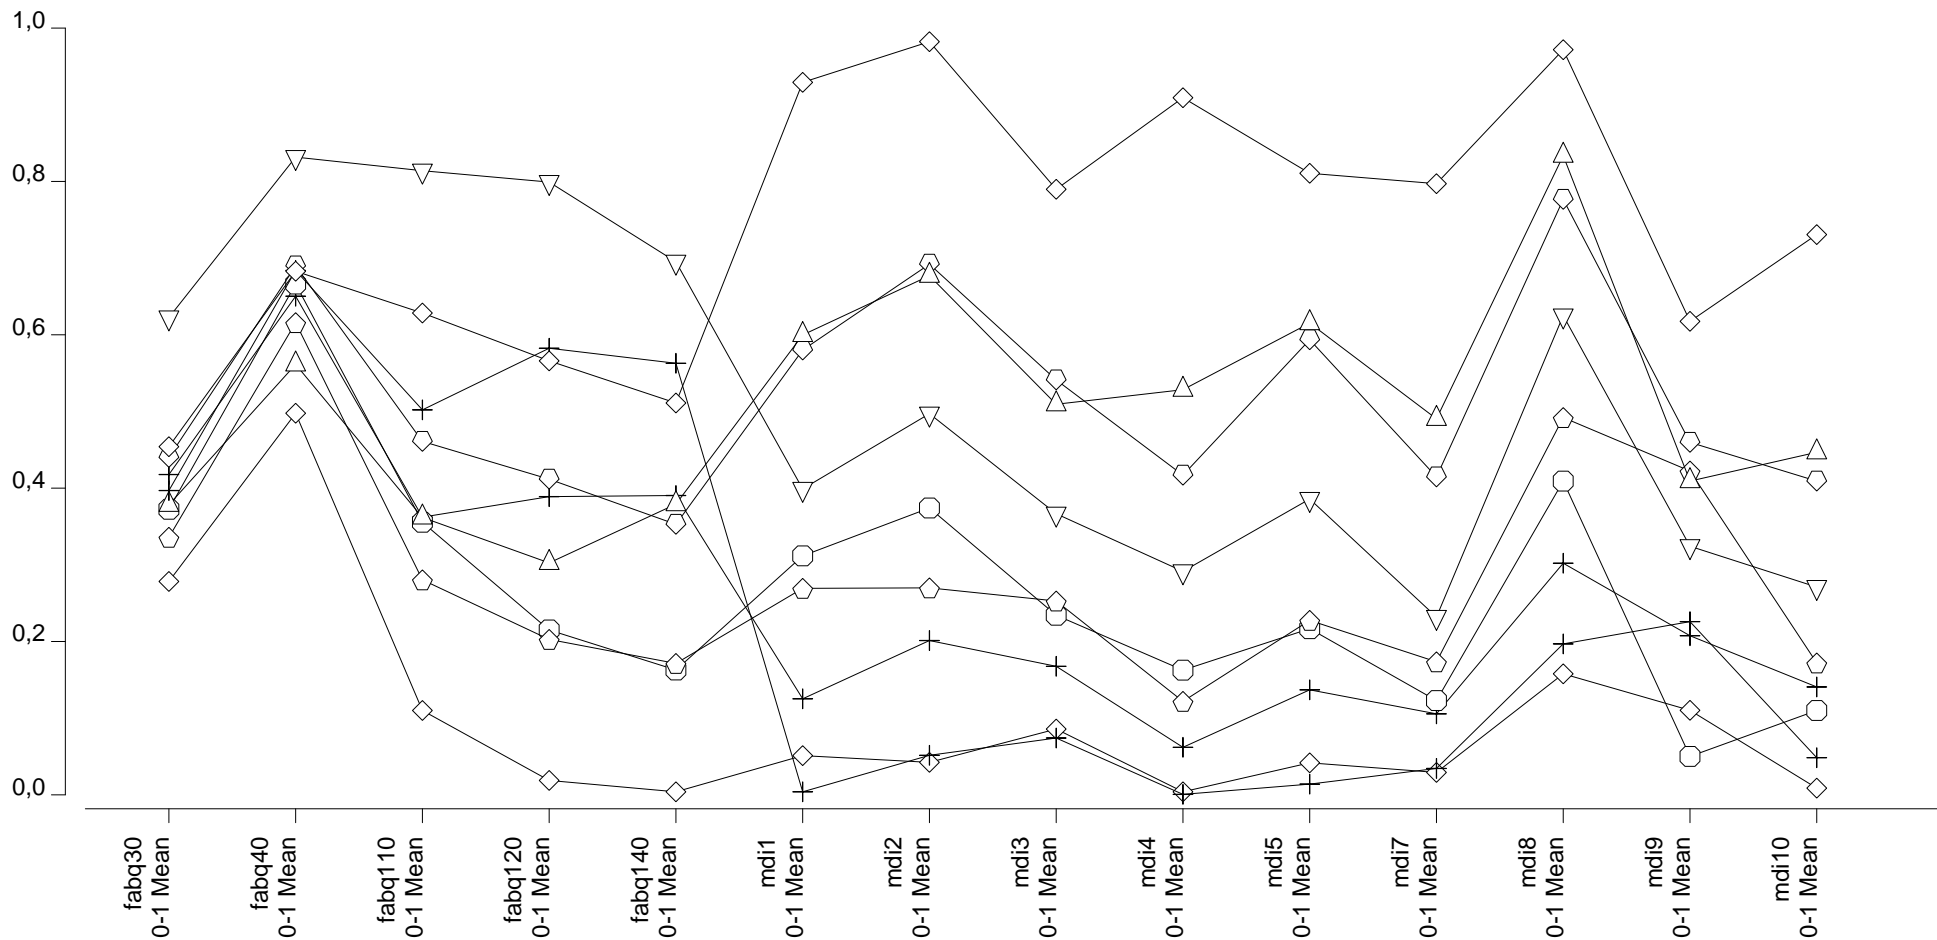

- Cluster1 +
- Cluster2 ◇
- Cluster3 ○
- Cluster4 ◊
- Cluster5 ◈
- Cluster6 △
- Cluster7 ▽
- Cluster8 +
- Cluster9 ◇



Psychology domain, single-item strategy, 10-domain profiles

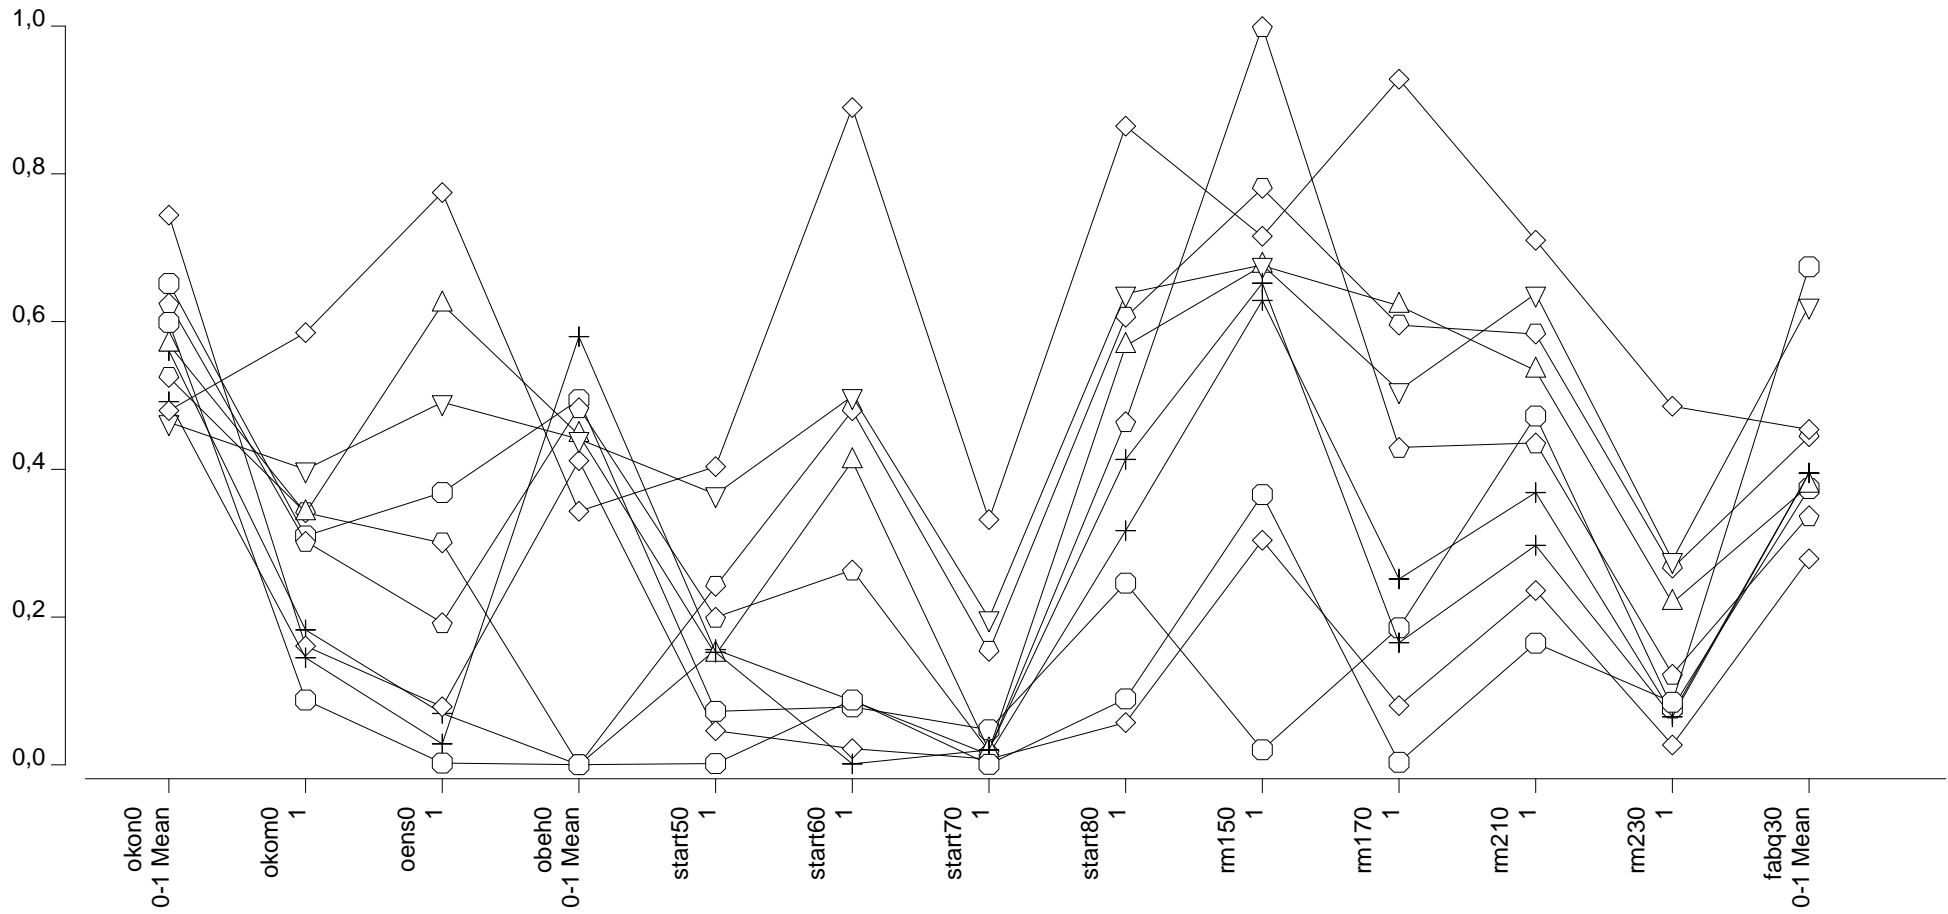

Cluster1 +  
 Cluster2 ◇  
 Cluster3 ○  
 Cluster4 ◇  
 Cluster5 ◇  
 Cluster6 △  
 Cluster7 ▽  
 Cluster8 +  
 Cluster9 ◇  
 Cluster10 ○  
 Lowest cluster size = 1.3%  
 BIC differs each round

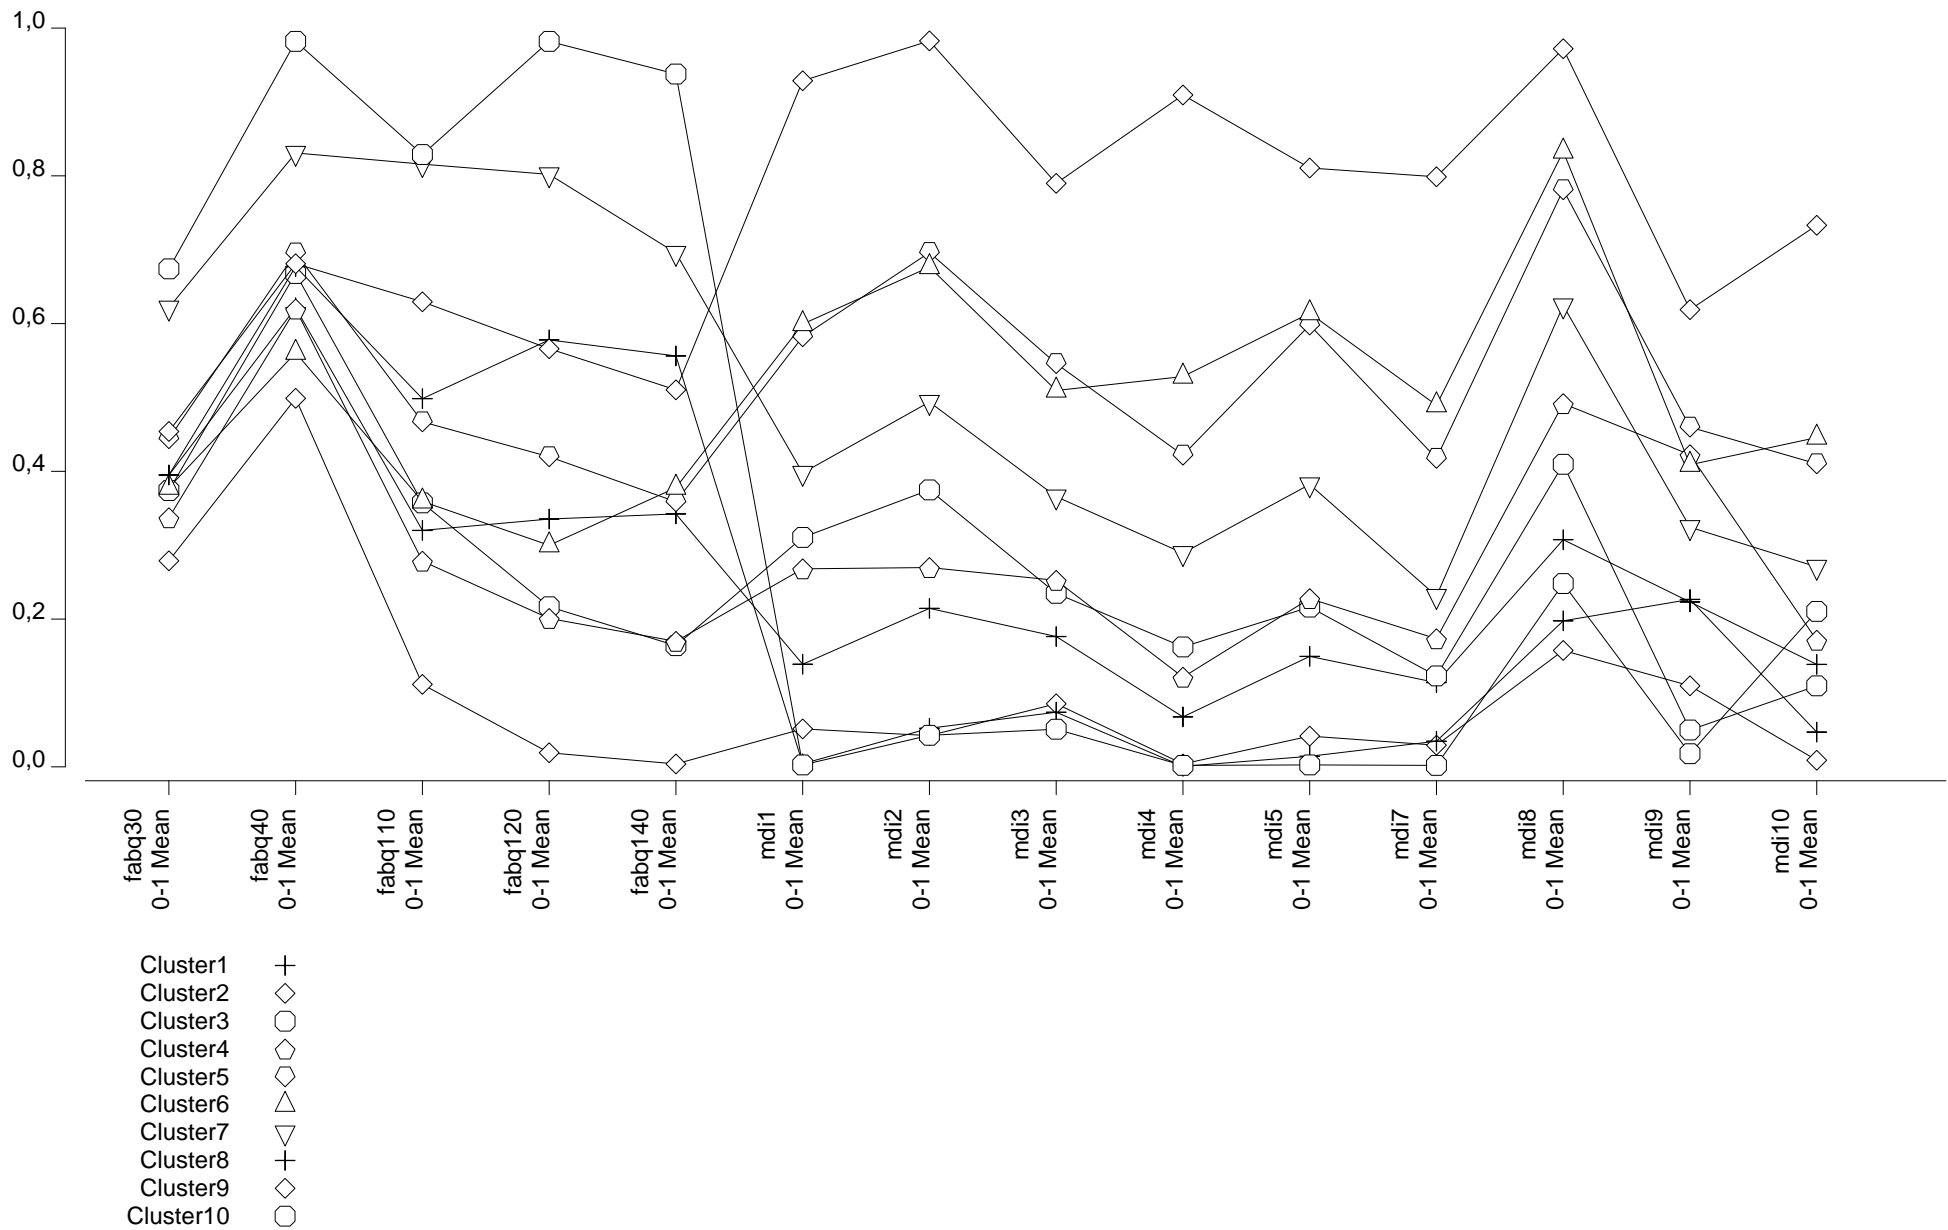

**Profiles in numbers – psychology domain, single-item strategy, 7-domain profiles**

The first row of numbers shows how large each cluster is. The body of the table contains (marginal) conditional probabilities that show how the clusters are related to the Nominal or Ordinal indicator variables. These probabilities sum to 1 within each cluster (column).

For indicators specified as Continuous, the body of the table contains means instead of probabilities. For indicators specified as Ordinal, means are displayed in addition to the conditional probabilities.

| <b>psych, single-item, 7-DP</b> | Cluster1 | s.e.   | Cluster2 | s.e.   | Cluster3 | s.e.   | Cluster4 | s.e.   | Cluster5 | s.e.   | Cluster6 | s.e.   | Cluster7 | s.e.   |
|---------------------------------|----------|--------|----------|--------|----------|--------|----------|--------|----------|--------|----------|--------|----------|--------|
| Cluster Size                    | 20,66%   | 0,0153 | 20,35%   | 0,0164 | 15,16%   | 0,0161 | 12,65%   | 0,0132 | 12,48%   | 0,0136 | 9,57%    | 0,0151 | 9,12%    | 0,0117 |
| Indicators                      |          |        |          |        |          |        |          |        |          |        |          |        |          |        |
| okon0                           |          |        |          |        |          |        |          |        |          |        |          |        |          |        |
| Mean                            | 5,6649   | 0,2063 | 6,867    | 0,1873 | 6,0739   | 0,2054 | 5,2386   | 0,266  | 6,5464   | 0,2151 | 4,5669   | 0,2797 | 5,172    | 0,2409 |
| okom0                           |          |        |          |        |          |        |          |        |          |        |          |        |          |        |
| 0                               | 0,829    | 0,0293 | 0,8296   | 0,0302 | 0,7147   | 0,0432 | 0,6593   | 0,0475 | 0,7096   | 0,047  | 0,5762   | 0,0623 | 0,5021   | 0,0591 |
| 1                               | 0,171    | 0,0293 | 0,1704   | 0,0302 | 0,2853   | 0,0432 | 0,3407   | 0,0475 | 0,2904   | 0,047  | 0,4238   | 0,0623 | 0,4979   | 0,0591 |
| oens0                           |          |        |          |        |          |        |          |        |          |        |          |        |          |        |
| 0                               | 0,9382   | 0,0191 | 0,9124   | 0,0229 | 0,7425   | 0,0457 | 0,7077   | 0,0465 | 0,6105   | 0,0531 | 0,5391   | 0,0643 | 0,2546   | 0,0538 |
| 1                               | 0,0618   | 0,0191 | 0,0876   | 0,0229 | 0,2575   | 0,0457 | 0,2923   | 0,0465 | 0,3895   | 0,0531 | 0,4609   | 0,0643 | 0,7454   | 0,0538 |
| obeh0                           |          |        |          |        |          |        |          |        |          |        |          |        |          |        |
| Mean                            | 0        | 0,0066 | 4,5856   | 0,254  | 4,633    | 0,2729 | 0        | 0,0107 | 4,8175   | 0,3355 | 4,7552   | 0,4158 | 3,9084   | 0,3678 |
| start50                         |          |        |          |        |          |        |          |        |          |        |          |        |          |        |
| 0                               | 0,8535   | 0,0269 | 0,9448   | 0,0202 | 0,8005   | 0,0388 | 0,7619   | 0,0429 | 0,9259   | 0,0279 | 0,6308   | 0,0628 | 0,7145   | 0,0535 |
| 1                               | 0,1465   | 0,0269 | 0,0552   | 0,0202 | 0,1995   | 0,0388 | 0,2381   | 0,0429 | 0,0741   | 0,0279 | 0,3692   | 0,0628 | 0,2855   | 0,0535 |
| start60                         |          |        |          |        |          |        |          |        |          |        |          |        |          |        |
| 0                               | 0,9151   | 0,0221 | 0,9668   | 0,0152 | 0,7323   | 0,0427 | 0,5281   | 0,0522 | 0,9154   | 0,0319 | 0,5512   | 0,0656 | 0,2769   | 0,0572 |
| 1                               | 0,0849   | 0,0221 | 0,0332   | 0,0152 | 0,2677   | 0,0427 | 0,4719   | 0,0522 | 0,0846   | 0,0319 | 0,4488   | 0,0656 | 0,7231   | 0,0572 |
| start70                         |          |        |          |        |          |        |          |        |          |        |          |        |          |        |
| 0                               | 0,9862   | 0,0093 | 0,9894   | 0,0084 | 0,9764   | 0,0144 | 0,8537   | 0,0356 | 0,9531   | 0,0232 | 0,8263   | 0,0466 | 0,8182   | 0,0455 |
| 1                               | 0,0138   | 0,0093 | 0,0106   | 0,0084 | 0,0236   | 0,0144 | 0,1463   | 0,0356 | 0,0469   | 0,0232 | 0,1737   | 0,0466 | 0,1818   | 0,0455 |
| start80                         |          |        |          |        |          |        |          |        |          |        |          |        |          |        |
| 0                               | 0,704    | 0,0353 | 0,8771   | 0,0289 | 0,5107   | 0,0497 | 0,3991   | 0,0516 | 0,7017   | 0,0492 | 0,3783   | 0,0634 | 0,2583   | 0,0545 |
| 1                               | 0,296    | 0,0353 | 0,1229   | 0,0289 | 0,4893   | 0,0497 | 0,6009   | 0,0516 | 0,2983   | 0,0492 | 0,6217   | 0,0634 | 0,7417   | 0,0545 |
| rm150                           |          |        |          |        |          |        |          |        |          |        |          |        |          |        |
| 0                               | 0,3984   | 0,0387 | 0,6425   | 0,0404 | 0,002    | 0,0081 | 0,2177   | 0,0425 | 0,9803   | 0,037  | 0,315    | 0,0629 | 0,3083   | 0,0551 |
| 1                               | 0,6016   | 0,0387 | 0,3575   | 0,0404 | 0,998    | 0,0081 | 0,7823   | 0,0425 | 0,0197   | 0,037  | 0,685    | 0,0629 | 0,6917   | 0,0551 |
| rm170                           |          |        |          |        |          |        |          |        |          |        |          |        |          |        |
| 0                               | 0,7748   | 0,0338 | 0,9018   | 0,0247 | 0,5499   | 0,0491 | 0,409    | 0,0499 | 0,785    | 0,0444 | 0,5036   | 0,0635 | 0,1548   | 0,0462 |
| 1                               | 0,2252   | 0,0338 | 0,0982   | 0,0247 | 0,4501   | 0,0491 | 0,591    | 0,0499 | 0,215    | 0,0444 | 0,4964   | 0,0635 | 0,8452   | 0,0462 |
| rm210                           |          |        |          |        |          |        |          |        |          |        |          |        |          |        |

|         |      |        |        |        |        |        |        |        |        |        |        |        |        |        |        |
|---------|------|--------|--------|--------|--------|--------|--------|--------|--------|--------|--------|--------|--------|--------|--------|
|         | 0    | 0,6516 | 0,0383 | 0,7605 | 0,0345 | 0,5643 | 0,0474 | 0,4148 | 0,0497 | 0,5024 | 0,0531 | 0,3726 | 0,0655 | 0,3216 | 0,0577 |
|         | 1    | 0,3484 | 0,0383 | 0,2395 | 0,0345 | 0,4357 | 0,0474 | 0,5852 | 0,0497 | 0,4976 | 0,0531 | 0,6274 | 0,0655 | 0,6784 | 0,0577 |
| rm230   |      |        |        |        |        |        |        |        |        |        |        |        |        |        |        |
|         | 0    | 0,9319 | 0,0195 | 0,9673 | 0,0144 | 0,8617 | 0,0344 | 0,7425 | 0,0448 | 0,9026 | 0,034  | 0,7253 | 0,0561 | 0,6439 | 0,0571 |
|         | 1    | 0,0681 | 0,0195 | 0,0327 | 0,0144 | 0,1383 | 0,0344 | 0,2575 | 0,0448 | 0,0974 | 0,034  | 0,2747 | 0,0561 | 0,3561 | 0,0571 |
| fabq30  |      |        |        |        |        |        |        |        |        |        |        |        |        |        |        |
|         | 0    | 0,2314 | 0,0269 | 0,3502 | 0,0323 | 0,3118 | 0,0357 | 0,1957 | 0,0313 | 0,2745 | 0,0375 | 0,0814 | 0,0243 | 0,1945 | 0,0351 |
|         | 1    | 0,1088 | 0,0121 | 0,1357 | 0,0136 | 0,1283 | 0,0137 | 0,0983 | 0,013  | 0,12   | 0,0139 | 0,054  | 0,0123 | 0,0979 | 0,0139 |
|         | 2    | 0,0819 | 0,0094 | 0,0842 | 0,0095 | 0,0846 | 0,0096 | 0,079  | 0,0094 | 0,084  | 0,0095 | 0,0574 | 0,0096 | 0,0788 | 0,0095 |
|         | 3    | 0,3513 | 0,0183 | 0,2975 | 0,0206 | 0,3173 | 0,0217 | 0,3614 | 0,0182 | 0,3345 | 0,0217 | 0,347  | 0,0223 | 0,3617 | 0,0185 |
|         | 4    | 0,0772 | 0,0103 | 0,0539 | 0,0083 | 0,0611 | 0,0096 | 0,0848 | 0,0117 | 0,0684 | 0,0106 | 0,1077 | 0,0132 | 0,0851 | 0,0122 |
|         | 5    | 0,0766 | 0,0119 | 0,0441 | 0,0083 | 0,053  | 0,0104 | 0,0898 | 0,0153 | 0,063  | 0,0125 | 0,1507 | 0,0233 | 0,0903 | 0,0166 |
|         | 6    | 0,0727 | 0,0136 | 0,0345 | 0,0081 | 0,044  | 0,0109 | 0,091  | 0,0196 | 0,0556 | 0,0139 | 0,2019 | 0,0399 | 0,0917 | 0,0217 |
|         | Mean | 2,4548 | 0,1474 | 1,8393 | 0,1412 | 2,0226 | 0,1696 | 2,6751 | 0,1947 | 2,2137 | 0,1923 | 3,6052 | 0,2489 | 2,6826 | 0,2205 |
| fabq40  |      |        |        |        |        |        |        |        |        |        |        |        |        |        |        |
|         | 0    | 0,0853 | 0,0155 | 0,1559 | 0,0226 | 0,1081 | 0,0206 | 0,0639 | 0,0162 | 0,0817 | 0,0194 | 0,0189 | 0,0109 | 0,0978 | 0,0237 |
|         | 1    | 0,055  | 0,0095 | 0,0848 | 0,013  | 0,0654 | 0,0116 | 0,0442 | 0,0097 | 0,0532 | 0,011  | 0,0171 | 0,008  | 0,0608 | 0,0127 |
|         | 2    | 0,0616 | 0,0091 | 0,0804 | 0,011  | 0,0689 | 0,0102 | 0,0533 | 0,0093 | 0,0603 | 0,01   | 0,0269 | 0,0095 | 0,0658 | 0,0109 |
|         | 3    | 0,2332 | 0,0163 | 0,257  | 0,016  | 0,245  | 0,0167 | 0,2166 | 0,0189 | 0,2309 | 0,0182 | 0,143  | 0,0312 | 0,2403 | 0,0183 |
|         | 4    | 0,0873 | 0,0096 | 0,0812 | 0,0092 | 0,0861 | 0,0095 | 0,0871 | 0,0096 | 0,0873 | 0,0096 | 0,0752 | 0,0109 | 0,0867 | 0,0096 |
|         | 5    | 0,19   | 0,0154 | 0,1495 | 0,0145 | 0,1761 | 0,0162 | 0,2037 | 0,0169 | 0,1923 | 0,0172 | 0,23   | 0,0164 | 0,1823 | 0,0182 |
|         | 6    | 0,2876 | 0,0272 | 0,1912 | 0,0233 | 0,2505 | 0,03   | 0,3313 | 0,0367 | 0,2942 | 0,0357 | 0,4891 | 0,062  | 0,2663 | 0,0378 |
|         | Mean | 3,9026 | 0,1513 | 3,2361 | 0,1664 | 3,6659 | 0,1863 | 4,1553 | 0,1906 | 3,9426 | 0,2031 | 4,8847 | 0,2387 | 3,7693 | 0,2312 |
| fabq110 |      |        |        |        |        |        |        |        |        |        |        |        |        |        |        |
|         | 0    | 0,3583 | 0,034  | 0,555  | 0,037  | 0,4548 | 0,0507 | 0,2432 | 0,038  | 0,3702 | 0,0457 | 0,0192 | 0,011  | 0,1817 | 0,0399 |
|         | 1    | 0,1023 | 0,0119 | 0,1215 | 0,0132 | 0,1145 | 0,0134 | 0,0813 | 0,0116 | 0,1041 | 0,0128 | 0,0122 | 0,0056 | 0,0669 | 0,0121 |
|         | 2    | 0,0713 | 0,0097 | 0,065  | 0,0091 | 0,0703 | 0,0096 | 0,0663 | 0,0094 | 0,0714 | 0,0097 | 0,0188 | 0,0066 | 0,0601 | 0,0094 |
|         | 3    | 0,2056 | 0,0168 | 0,1437 | 0,0165 | 0,1788 | 0,0197 | 0,2236 | 0,017  | 0,2027 | 0,0183 | 0,12   | 0,0262 | 0,2235 | 0,017  |
|         | 4    | 0,1101 | 0,0137 | 0,059  | 0,0103 | 0,0844 | 0,0154 | 0,1401 | 0,0166 | 0,1069 | 0,0158 | 0,1423 | 0,0192 | 0,1543 | 0,0176 |
|         | 5    | 0,0804 | 0,0127 | 0,0331 | 0,0076 | 0,0544 | 0,0137 | 0,1198 | 0,0185 | 0,0769 | 0,0152 | 0,2303 | 0,0251 | 0,1454 | 0,0225 |
|         | 6    | 0,0721 | 0,0141 | 0,0227 | 0,0065 | 0,0429 | 0,0139 | 0,1257 | 0,0246 | 0,0678 | 0,0171 | 0,4572 | 0,0586 | 0,168  | 0,0338 |
|         | Mean | 2,1364 | 0,1697 | 1,2203 | 0,1456 | 1,6584 | 0,2341 | 2,7984 | 0,2303 | 2,0741 | 0,2303 | 4,8739 | 0,2107 | 3,2101 | 0,2754 |
| fabq120 |      |        |        |        |        |        |        |        |        |        |        |        |        |        |        |
|         | 0    | 0,3446 | 0,0333 | 0,6737 | 0,037  | 0,532  | 0,0529 | 0,3115 | 0,0424 | 0,5498 | 0,0507 | 0,0348 | 0,0165 | 0,2481 | 0,046  |
|         | 1    | 0,1006 | 0,0115 | 0,1232 | 0,0129 | 0,122  | 0,0131 | 0,0949 | 0,0122 | 0,1229 | 0,013  | 0,0191 | 0,0073 | 0,0822 | 0,0128 |
|         | 2    | 0,0642 | 0,0093 | 0,0493 | 0,008  | 0,0612 | 0,0092 | 0,0632 | 0,0093 | 0,0601 | 0,0092 | 0,0228 | 0,0069 | 0,0596 | 0,0092 |
|         | 3    | 0,1997 | 0,0172 | 0,096  | 0,0158 | 0,1493 | 0,0205 | 0,2049 | 0,0176 | 0,1432 | 0,0203 | 0,1329 | 0,0242 | 0,2105 | 0,0174 |
|         | 4    | 0,0901 | 0,0126 | 0,0271 | 0,0068 | 0,0529 | 0,012  | 0,0964 | 0,0141 | 0,0495 | 0,0112 | 0,1124 | 0,016  | 0,1078 | 0,0155 |
|         | 5    | 0,0992 | 0,0147 | 0,0187 | 0,0059 | 0,0458 | 0,0134 | 0,1108 | 0,0186 | 0,0418 | 0,012  | 0,2322 | 0,0264 | 0,1349 | 0,0226 |
|         | 6    | 0,1016 | 0,0177 | 0,012  | 0,0047 | 0,0368 | 0,0137 | 0,1184 | 0,0248 | 0,0328 | 0,0117 | 0,4458 | 0,0559 | 0,1568 | 0,0332 |

|         |        |        |        |        |        |        |        |        |        |        |        |        |        |        |
|---------|--------|--------|--------|--------|--------|--------|--------|--------|--------|--------|--------|--------|--------|--------|
| Mean    | 2,2943 | 0,1759 | 0,7837 | 0,1293 | 1,3539 | 0,2335 | 2,4856 | 0,2427 | 1,2759 | 0,2147 | 4,7487 | 0,229  | 2,8796 | 0,291  |
| fabq140 |        |        |        |        |        |        |        |        |        |        |        |        |        |        |
| 0       | 0,3843 | 0,0338 | 0,7235 | 0,0344 | 0,5725 | 0,0488 | 0,4095 | 0,0449 | 0,6262 | 0,0462 | 0,1167 | 0,0337 | 0,2899 | 0,0484 |
| 1       | 0,1002 | 0,0112 | 0,117  | 0,0123 | 0,1191 | 0,0126 | 0,1038 | 0,0122 | 0,1206 | 0,0125 | 0,0437 | 0,0104 | 0,0842 | 0,0124 |
| 2       | 0,0761 | 0,0101 | 0,0551 | 0,0087 | 0,0721 | 0,0099 | 0,0766 | 0,0101 | 0,0676 | 0,0099 | 0,0477 | 0,0093 | 0,0713 | 0,01   |
| 3       | 0,1076 | 0,0127 | 0,0483 | 0,0095 | 0,0813 | 0,0125 | 0,1052 | 0,0128 | 0,0706 | 0,0122 | 0,0969 | 0,0133 | 0,1124 | 0,013  |
| 4       | 0,085  | 0,0122 | 0,0237 | 0,0064 | 0,0512 | 0,011  | 0,0808 | 0,0127 | 0,0412 | 0,0098 | 0,11   | 0,0147 | 0,0989 | 0,0144 |
| 5       | 0,0925 | 0,014  | 0,016  | 0,0054 | 0,0445 | 0,012  | 0,0855 | 0,0156 | 0,0331 | 0,0098 | 0,1721 | 0,0229 | 0,12   | 0,02   |
| 6       | 0,1544 | 0,023  | 0,0165 | 0,0068 | 0,0592 | 0,0192 | 0,1387 | 0,0283 | 0,0408 | 0,0145 | 0,4128 | 0,052  | 0,2233 | 0,041  |
| Mean    | 2,304  | 0,1894 | 0,6457 | 0,1237 | 1,2902 | 0,2299 | 2,1549 | 0,2532 | 1,0425 | 0,1987 | 4,2073 | 0,2879 | 2,8992 | 0,3134 |
| mdi1    |        |        |        |        |        |        |        |        |        |        |        |        |        |        |
| 0       | 0,7692 | 0,0392 | 0,8888 | 0,0274 | 0,408  | 0,0479 | 0,0937 | 0,0239 | 0,3466 | 0,0513 | 0,3125 | 0,0542 | 0,0116 | 0,0057 |
| 1       | 0,2274 | 0,0378 | 0,1105 | 0,027  | 0,5533 | 0,0398 | 0,6641 | 0,031  | 0,5999 | 0,0402 | 0,6235 | 0,0402 | 0,3728 | 0,0584 |
| 2       | 0,0035 | 0,0016 | 0,0007 | 0,0004 | 0,0386 | 0,0124 | 0,2423 | 0,0419 | 0,0534 | 0,0169 | 0,064  | 0,0208 | 0,6155 | 0,0633 |
| Mean    | 0,2343 | 0,0405 | 0,112  | 0,0278 | 0,6306 | 0,0576 | 1,1486 | 0,0607 | 0,7068 | 0,0649 | 0,7515 | 0,0716 | 1,6039 | 0,0683 |
| mdi2    |        |        |        |        |        |        |        |        |        |        |        |        |        |        |
| 0       | 0,6452 | 0,0386 | 0,8927 | 0,0273 | 0,4396 | 0,0449 | 0,0856 | 0,023  | 0,2987 | 0,0477 | 0,2657 | 0,0534 | 0,0155 | 0,0079 |
| 1       | 0,3239 | 0,0316 | 0,105  | 0,0261 | 0,4665 | 0,0303 | 0,4551 | 0,0343 | 0,5258 | 0,0267 | 0,5321 | 0,025  | 0,2458 | 0,0488 |
| 2       | 0,0308 | 0,0089 | 0,0023 | 0,0013 | 0,0939 | 0,0216 | 0,4593 | 0,0517 | 0,1755 | 0,0352 | 0,2022 | 0,0466 | 0,7387 | 0,0561 |
| Mean    | 0,3856 | 0,0462 | 0,1096 | 0,0286 | 0,6543 | 0,0637 | 1,3737 | 0,0723 | 0,8768 | 0,0795 | 0,9365 | 0,0971 | 1,7232 | 0,0636 |
| mdi3    |        |        |        |        |        |        |        |        |        |        |        |        |        |        |
| 0       | 0,3131 | 0,0331 | 0,5702 | 0,0398 | 0,1291 | 0,0218 | 0,0249 | 0,0073 | 0,1415 | 0,0257 | 0,0847 | 0,0197 | 0,0056 | 0,0026 |
| 1       | 0,5908 | 0,0237 | 0,4093 | 0,0347 | 0,5558 | 0,0279 | 0,244  | 0,0393 | 0,5699 | 0,0283 | 0,4763 | 0,0428 | 0,0897 | 0,0269 |
| 2       | 0,0689 | 0,0122 | 0,0182 | 0,0053 | 0,1479 | 0,0163 | 0,1481 | 0,0166 | 0,142  | 0,0169 | 0,1656 | 0,017  | 0,0883 | 0,0167 |
| 3       | 0,0221 | 0,0072 | 0,0022 | 0,0011 | 0,1082 | 0,0182 | 0,2471 | 0,0248 | 0,0973 | 0,0193 | 0,1583 | 0,0258 | 0,2391 | 0,0245 |
| 4       | 0,0049 | 0,0024 | 0,0002 | 0,0001 | 0,0546 | 0,0145 | 0,2845 | 0,0383 | 0,046  | 0,0144 | 0,1044 | 0,028  | 0,4465 | 0,0443 |
| 5       | 0,0002 | 0,0001 | 0      | 0      | 0,0043 | 0,0019 | 0,0514 | 0,0153 | 0,0034 | 0,0017 | 0,0108 | 0,0049 | 0,1307 | 0,0314 |
| Mean    | 0,8155 | 0,0601 | 0,453  | 0,0465 | 1,4164 | 0,1027 | 2,6766 | 0,1571 | 1,3465 | 0,1126 | 1,7537 | 0,1612 | 3,4234 | 0,1464 |
| mdi4    |        |        |        |        |        |        |        |        |        |        |        |        |        |        |
| 0       | 0,8908 | 0,0263 | 0,9943 | 0,0068 | 0,6755 | 0,0439 | 0,3782 | 0,0476 | 0,6313 | 0,0532 | 0,5678 | 0,0581 | 0,0666 | 0,0238 |
| 1       | 0,1042 | 0,0239 | 0,0057 | 0,0068 | 0,2779 | 0,0324 | 0,4261 | 0,0284 | 0,3076 | 0,0369 | 0,3462 | 0,0371 | 0,3173 | 0,039  |
| 2       | 0,005  | 0,0027 | 0      | 0      | 0,0466 | 0,0147 | 0,1957 | 0,0373 | 0,0611 | 0,0202 | 0,086  | 0,0265 | 0,6161 | 0,059  |
| Mean    | 0,1141 | 0,0288 | 0,0057 | 0,0068 | 0,3712 | 0,0568 | 0,8176 | 0,0807 | 0,4299 | 0,0715 | 0,5182 | 0,0824 | 1,5495 | 0,081  |
| mdi5    |        |        |        |        |        |        |        |        |        |        |        |        |        |        |
| 0       | 0,7683 | 0,0329 | 0,9128 | 0,023  | 0,5578 | 0,0453 | 0,2238 | 0,0398 | 0,5963 | 0,0512 | 0,442  | 0,0603 | 0,0855 | 0,0263 |
| 1       | 0,2001 | 0,0247 | 0,0827 | 0,0206 | 0,3265 | 0,0264 | 0,3817 | 0,0233 | 0,3075 | 0,03   | 0,3702 | 0,0265 | 0,2955 | 0,0327 |
| 2       | 0,0316 | 0,0097 | 0,0045 | 0,0025 | 0,1158 | 0,0254 | 0,3945 | 0,0484 | 0,0961 | 0,0258 | 0,1879 | 0,0439 | 0,6191 | 0,0553 |
| Mean    | 0,2633 | 0,0418 | 0,0917 | 0,0253 | 0,558  | 0,0686 | 1,1706 | 0,0855 | 0,4998 | 0,0752 | 0,7459 | 0,1021 | 1,5336 | 0,0803 |
| mdi7    |        |        |        |        |        |        |        |        |        |        |        |        |        |        |
| 0       | 0,8143 | 0,0302 | 0,9428 | 0,0199 | 0,6267 | 0,0453 | 0,3854 | 0,0467 | 0,7232 | 0,0436 | 0,6264 | 0,0572 | 0,1166 | 0,0329 |

|       |        |        |        |        |        |        |        |        |        |        |        |        |        |        |
|-------|--------|--------|--------|--------|--------|--------|--------|--------|--------|--------|--------|--------|--------|--------|
| 1     | 0,1697 | 0,0252 | 0,0557 | 0,0189 | 0,3057 | 0,0311 | 0,4134 | 0,0271 | 0,2405 | 0,033  | 0,3058 | 0,0377 | 0,365  | 0,0327 |
| 2     | 0,016  | 0,0059 | 0,0015 | 0,0011 | 0,0676 | 0,0186 | 0,2012 | 0,036  | 0,0363 | 0,0126 | 0,0677 | 0,0231 | 0,5184 | 0,0583 |
| Mean  | 0,2018 | 0,0355 | 0,0587 | 0,0209 | 0,4409 | 0,0618 | 0,8157 | 0,0789 | 0,3131 | 0,055  | 0,4413 | 0,0787 | 1,4019 | 0,0888 |
| mdi8  |        |        |        |        |        |        |        |        |        |        |        |        |        |        |
| 0     | 0,4693 | 0,0394 | 0,6812 | 0,0382 | 0,1456 | 0,0302 | 0,0288 | 0,0097 | 0,2154 | 0,0376 | 0,1135 | 0,0303 | 0,0024 | 0,0018 |
| 1     | 0,4795 | 0,0308 | 0,3046 | 0,0343 | 0,5979 | 0,0241 | 0,3975 | 0,0436 | 0,6063 | 0,0229 | 0,5784 | 0,0311 | 0,1399 | 0,0473 |
| 2     | 0,0512 | 0,0125 | 0,0142 | 0,0047 | 0,2565 | 0,0401 | 0,5737 | 0,0518 | 0,1784 | 0,0336 | 0,3082 | 0,0534 | 0,8577 | 0,0491 |
| Mean  | 0,5819 | 0,0497 | 0,3331 | 0,0423 | 1,1109 | 0,0667 | 1,5449 | 0,0605 | 0,963  | 0,0675 | 1,1947 | 0,081  | 1,8553 | 0,0508 |
| mdi9  |        |        |        |        |        |        |        |        |        |        |        |        |        |        |
| 0     | 0,3406 | 0,0298 | 0,5194 | 0,0372 | 0,1188 | 0,0197 | 0,1127 | 0,0209 | 0,6994 | 0,0469 | 0,2032 | 0,0346 | 0,0739 | 0,0175 |
| 1     | 0,4438 | 0,0206 | 0,3965 | 0,0236 | 0,3053 | 0,0269 | 0,2964 | 0,0294 | 0,2757 | 0,0377 | 0,3938 | 0,0289 | 0,2307 | 0,0327 |
| 2     | 0,1093 | 0,0126 | 0,0573 | 0,0109 | 0,1483 | 0,0145 | 0,1475 | 0,0145 | 0,0206 | 0,0075 | 0,1444 | 0,0149 | 0,1362 | 0,0148 |
| 3     | 0,0643 | 0,0111 | 0,0197 | 0,0064 | 0,1718 | 0,0188 | 0,175  | 0,0193 | 0,0037 | 0,0022 | 0,1262 | 0,0203 | 0,1918 | 0,0197 |
| 4     | 0,0353 | 0,0088 | 0,0064 | 0,003  | 0,1862 | 0,0259 | 0,1942 | 0,0285 | 0,0006 | 0,0005 | 0,1033 | 0,0255 | 0,2527 | 0,0341 |
| 5     | 0,0067 | 0,0024 | 0,0007 | 0,0004 | 0,0696 | 0,0159 | 0,0743 | 0,0181 | 0      | 0      | 0,0291 | 0,0109 | 0,1147 | 0,0261 |
| Mean  | 1,03   | 0,0838 | 0,5991 | 0,0667 | 2,21   | 0,1462 | 2,2646 | 0,165  | 0,3304 | 0,0595 | 1,6199 | 0,1809 | 2,6627 | 0,1871 |
| mdi10 |        |        |        |        |        |        |        |        |        |        |        |        |        |        |
| 0     | 0,7776 | 0,0312 | 0,9859 | 0,0133 | 0,6571 | 0,043  | 0,4465 | 0,0464 | 0,7473 | 0,0425 | 0,5959 | 0,0565 | 0,2403 | 0,0452 |
| 1     | 0,1746 | 0,0206 | 0,0139 | 0,0129 | 0,2379 | 0,0237 | 0,303  | 0,0218 | 0,1924 | 0,0259 | 0,2628 | 0,0262 | 0,3008 | 0,0221 |
| 2     | 0,0478 | 0,013  | 0,0002 | 0,0005 | 0,105  | 0,0245 | 0,2505 | 0,0389 | 0,0604 | 0,019  | 0,1412 | 0,0364 | 0,4588 | 0,0542 |
| Mean  | 0,2702 | 0,0432 | 0,0144 | 0,0138 | 0,4479 | 0,0659 | 0,8039 | 0,0828 | 0,3131 | 0,0605 | 0,5453 | 0,0914 | 1,2185 | 0,0973 |

| Loadings, psych, single-item, 7-DP | Clusters | R <sup>2</sup> |
|------------------------------------|----------|----------------|
| okon0                              | 0,3012   | 0,0907         |
| okom0                              | 0,2412   | 0,0582         |
| oens0                              | 0,4614   | 0,2129         |
| obeh0                              | 0,6651   | 0,4424         |
| start50                            | 0,2603   | 0,0677         |
| start60                            | 0,5156   | 0,2658         |
| start70                            | 0,2745   | 0,0753         |
| start80                            | 0,4122   | 0,1699         |
| rm150                              | 0,5842   | 0,3413         |
| rm170                              | 0,4727   | 0,2235         |
| rm210                              | 0,2952   | 0,0871         |
| rm230                              | 0,3024   | 0,0915         |

|         |        |        |
|---------|--------|--------|
| fabq30  | 0,2669 | 0,0712 |
| fabq40  | 0,2278 | 0,0519 |
| fabq110 | 0,479  | 0,2295 |
| fabq120 | 0,5209 | 0,2714 |
| fabq140 | 0,4699 | 0,2208 |
| mdi1    | 0,6834 | 0,4671 |
| mdi2    | 0,6647 | 0,4419 |
| mdi3    | 0,6895 | 0,4754 |
| mdi4    | 0,6494 | 0,4217 |
| mdi5    | 0,5939 | 0,3527 |
| mdi7    | 0,5746 | 0,3301 |
| mdi8    | 0,6518 | 0,4248 |
| mdi9    | 0,5603 | 0,3139 |
| mdi10   | 0,4924 | 0,2424 |

## Profiles in numbers, 8-DP

The first row of numbers shows how large each cluster is. The body of the table contains (marginal) conditional probabilities that show how the clusters are related to the Nominal or Ordinal indicator variables. These probabilities sum to 1 within each cluster (column).

For indicators specified as Continuous, the body of the table contains means instead of probabilities. For indicators specified as Ordinal, means are displayed in addition to the conditional probabilities.

| 8-DP,<br>psych.doma<br>in | Cluster1 | s.e.   | Cluster2 | s.e.   | Cluster3 | s.e.   | Cluster4 | s.e.   | Cluster5 | s.e.   | Cluster6 | s.e.   | Cluster7 | s.e.   | Cluster8 | s.e.   |
|---------------------------|----------|--------|----------|--------|----------|--------|----------|--------|----------|--------|----------|--------|----------|--------|----------|--------|
| Cluster Size              | 20,28%   | 0,0155 | 16,81%   | 0,0172 | 13,93%   | 0,0145 | 13,17%   | 0,0133 | 12,94%   | 0,0132 | 11,69%   | 0,0144 | 6,08%    | 0,0091 | 5,10%    | 0,0093 |
| <b>Indicators</b>         |          |        |          |        |          |        |          |        |          |        |          |        |          |        |          |        |
| okon0                     |          |        |          |        |          |        |          |        |          |        |          |        |          |        |          |        |
| Mean                      | 5,6021   | 0,2075 | 5,2146   | 0,194  | 7,4385   | 0,2067 | 6,5619   | 0,1964 | 5,2271   | 0,2606 | 6,4157   | 0,235  | 4,9744   | 0,2868 | 4,6809   | 0,4403 |
| okom0                     |          |        |          |        |          |        |          |        |          |        |          |        |          |        |          |        |
| 0                         | 0,8289   | 0,0298 | 0,6252   | 0,0435 | 0,8408   | 0,0383 | 0,6842   | 0,0473 | 0,6667   | 0,046  | 0,7113   | 0,054  | 0,4765   | 0,0716 | 0,8386   | 0,0599 |
| 1                         | 0,1711   | 0,0298 | 0,3748   | 0,0435 | 0,1592   | 0,0383 | 0,3158   | 0,0473 | 0,3333   | 0,046  | 0,2887   | 0,054  | 0,5235   | 0,0716 | 0,1614   | 0,0599 |
| oens0                     |          |        |          |        |          |        |          |        |          |        |          |        |          |        |          |        |
| 0                         | 0,9352   | 0,0196 | 0,4683   | 0,0469 | 0,9303   | 0,0281 | 0,6392   | 0,0481 | 0,7119   | 0,0448 | 0,7913   | 0,0482 | 0,2646   | 0,0659 | 0,9752   | 0,0266 |
| 1                         | 0,0648   | 0,0196 | 0,5317   | 0,0469 | 0,0697   | 0,0281 | 0,3608   | 0,0481 | 0,2881   | 0,0448 | 0,2087   | 0,0482 | 0,7354   | 0,0659 | 0,0248   | 0,0266 |
| obeh0                     |          |        |          |        |          |        |          |        |          |        |          |        |          |        |          |        |
| Mean                      | -0,0000  | 0,0063 | 4,5706   | 0,2678 | 4,1179   | 0,2867 | 4,9454   | 0,326  | 0,0000   | 0,0098 | 4,6153   | 0,3132 | 3,6379   | 0,4348 | 5,849    | 0,5705 |
| start50                   |          |        |          |        |          |        |          |        |          |        |          |        |          |        |          |        |
| 0                         | 0,8502   | 0,0274 | 0,7293   | 0,0398 | 0,953    | 0,0203 | 0,9292   | 0,0257 | 0,7636   | 0,0421 | 0,829    | 0,0414 | 0,6627   | 0,0675 | 0,8093   | 0,0627 |
| 1                         | 0,1498   | 0,0274 | 0,2707   | 0,0398 | 0,047    | 0,0203 | 0,0708   | 0,0257 | 0,2364   | 0,0421 | 0,171    | 0,0414 | 0,3373   | 0,0675 | 0,1907   | 0,0627 |
| start60                   |          |        |          |        |          |        |          |        |          |        |          |        |          |        |          |        |
| 0                         | 0,9122   | 0,023  | 0,5779   | 0,0466 | 0,9795   | 0,0148 | 0,9135   | 0,0301 | 0,5263   | 0,0512 | 0,7745   | 0,0471 | 0,1648   | 0,056  | 0,9478   | 0,0384 |
| 1                         | 0,0878   | 0,023  | 0,4221   | 0,0466 | 0,0205   | 0,0148 | 0,0865   | 0,0301 | 0,4737   | 0,0512 | 0,2255   | 0,0471 | 0,8352   | 0,056  | 0,0522   | 0,0384 |
| start70                   |          |        |          |        |          |        |          |        |          |        |          |        |          |        |          |        |
| 0                         | 0,9884   | 0,0095 | 0,8962   | 0,0269 | 0,9918   | 0,0088 | 0,9473   | 0,0238 | 0,852    | 0,0348 | 0,9891   | 0,0129 | 0,7388   | 0,0626 | 0,9605   | 0,0307 |
| 1                         | 0,0116   | 0,0095 | 0,1038   | 0,0269 | 0,0082   | 0,0088 | 0,0527   | 0,0238 | 0,148    | 0,0348 | 0,0109   | 0,0129 | 0,2612   | 0,0626 | 0,0395   | 0,0307 |
| start80                   |          |        |          |        |          |        |          |        |          |        |          |        |          |        |          |        |
| 0                         | 0,7008   | 0,0358 | 0,3979   | 0,0441 | 0,9423   | 0,0253 | 0,7425   | 0,0447 | 0,4      | 0,0507 | 0,603    | 0,0605 | 0,1694   | 0,054  | 0,5611   | 0,0836 |
| 1                         | 0,2992   | 0,0358 | 0,6021   | 0,0441 | 0,0577   | 0,0253 | 0,2575   | 0,0447 | 0,6      | 0,0507 | 0,397    | 0,0605 | 0,8306   | 0,054  | 0,4389   | 0,0836 |
| rm150                     |          |        |          |        |          |        |          |        |          |        |          |        |          |        |          |        |
| 0                         | 0,396    | 0,0387 | 0,2883   | 0,0439 | 0,7199   | 0,0524 | 0,9953   | 0,0156 | 0,2199   | 0,0416 | 0,0012   | 0,0053 | 0,2904   | 0,0658 | 0,2866   | 0,0869 |
| 1                         | 0,604    | 0,0387 | 0,7117   | 0,0439 | 0,2801   | 0,0524 | 0,0047   | 0,0156 | 0,7801   | 0,0416 | 0,9988   | 0,0053 | 0,7096   | 0,0658 | 0,7134   | 0,0869 |
| rm170                     |          |        |          |        |          |        |          |        |          |        |          |        |          |        |          |        |

|         |        |        |        |        |        |        |        |        |        |        |        |        |        |        |        |        |
|---------|--------|--------|--------|--------|--------|--------|--------|--------|--------|--------|--------|--------|--------|--------|--------|--------|
| 0       | 0,7698 | 0,034  | 0,4663 | 0,0446 | 0,9249 | 0,0269 | 0,8057 | 0,0402 | 0,4151 | 0,049  | 0,6093 | 0,0607 | 0,0878 | 0,0433 | 0,7768 | 0,0721 |
| 1       | 0,2302 | 0,034  | 0,5337 | 0,0446 | 0,0751 | 0,0269 | 0,1943 | 0,0402 | 0,5849 | 0,049  | 0,3907 | 0,0607 | 0,9122 | 0,0433 | 0,2232 | 0,0721 |
| rm210   |        |        |        |        |        |        |        |        |        |        |        |        |        |        |        |        |
| 0       | 0,653  | 0,0387 | 0,4583 | 0,0445 | 0,7786 | 0,0426 | 0,531  | 0,0513 | 0,4083 | 0,0482 | 0,5562 | 0,0567 | 0,2636 | 0,064  | 0,6581 | 0,0798 |
| 1       | 0,347  | 0,0387 | 0,5417 | 0,0445 | 0,2214 | 0,0426 | 0,469  | 0,0513 | 0,5917 | 0,0482 | 0,4438 | 0,0567 | 0,7364 | 0,064  | 0,3419 | 0,0798 |
| rm230   |        |        |        |        |        |        |        |        |        |        |        |        |        |        |        |        |
| 0       | 0,9321 | 0,0199 | 0,7543 | 0,0384 | 0,9779 | 0,0165 | 0,9198 | 0,0291 | 0,7458 | 0,0433 | 0,8896 | 0,0375 | 0,5756 | 0,0703 | 0,9062 | 0,0511 |
| 1       | 0,0679 | 0,0199 | 0,2457 | 0,0384 | 0,0221 | 0,0165 | 0,0802 | 0,0291 | 0,2542 | 0,0433 | 0,1104 | 0,0375 | 0,4244 | 0,0703 | 0,0938 | 0,0511 |
| fabq30  |        |        |        |        |        |        |        |        |        |        |        |        |        |        |        |        |
| 0       | 0,2248 | 0,0265 | 0,1597 | 0,0256 | 0,3818 | 0,0403 | 0,2655 | 0,0356 | 0,1919 | 0,0299 | 0,3479 | 0,0436 | 0,202  | 0,042  | 0,248  | 0,0551 |
| 1       | 0,1065 | 0,0119 | 0,0858 | 0,0115 | 0,1405 | 0,0143 | 0,1173 | 0,0136 | 0,0966 | 0,0126 | 0,1349 | 0,0145 | 0,0997 | 0,0155 | 0,1129 | 0,0175 |
| 2       | 0,0808 | 0,0093 | 0,0737 | 0,0089 | 0,0827 | 0,0094 | 0,083  | 0,0095 | 0,0778 | 0,0093 | 0,0837 | 0,0095 | 0,0788 | 0,0097 | 0,0822 | 0,0097 |
| 3       | 0,3499 | 0,0178 | 0,3622 | 0,0171 | 0,2784 | 0,0244 | 0,3354 | 0,0205 | 0,3582 | 0,0177 | 0,2967 | 0,0254 | 0,3561 | 0,0191 | 0,3421 | 0,0253 |
| 4       | 0,0783 | 0,0103 | 0,0919 | 0,0118 | 0,0484 | 0,0087 | 0,07   | 0,0105 | 0,0852 | 0,0115 | 0,0543 | 0,0098 | 0,0831 | 0,0128 | 0,0736 | 0,0139 |
| 5       | 0,0801 | 0,0122 | 0,1065 | 0,0159 | 0,0384 | 0,0088 | 0,0668 | 0,0126 | 0,0925 | 0,0152 | 0,0455 | 0,0107 | 0,0885 | 0,0185 | 0,0722 | 0,0191 |
| 6       | 0,0796 | 0,0144 | 0,1201 | 0,0211 | 0,0297 | 0,0086 | 0,0619 | 0,0145 | 0,0977 | 0,0197 | 0,037  | 0,011  | 0,0918 | 0,0251 | 0,069  | 0,024  |
| Mean    | 2,509  | 0,149  | 2,941  | 0,1753 | 1,7049 | 0,1725 | 2,2751 | 0,1871 | 2,7166 | 0,1882 | 1,8589 | 0,1982 | 2,6512 | 0,2629 | 2,3731 | 0,3089 |
| fabq40  |        |        |        |        |        |        |        |        |        |        |        |        |        |        |        |        |
| 0       | 0,0861 | 0,0157 | 0,0659 | 0,0145 | 0,1899 | 0,0296 | 0,0782 | 0,0185 | 0,0627 | 0,0156 | 0,1068 | 0,0237 | 0,082  | 0,0253 | 0,0733 | 0,0277 |
| 1       | 0,0551 | 0,0096 | 0,0451 | 0,0089 | 0,0967 | 0,0153 | 0,0513 | 0,0106 | 0,0434 | 0,0094 | 0,0646 | 0,0127 | 0,0531 | 0,0135 | 0,0489 | 0,0148 |
| 2       | 0,0614 | 0,0091 | 0,0536 | 0,0087 | 0,0857 | 0,0117 | 0,0585 | 0,0097 | 0,0523 | 0,0091 | 0,068  | 0,0107 | 0,0599 | 0,0115 | 0,0566 | 0,0127 |
| 3       | 0,2308 | 0,0162 | 0,2156 | 0,0172 | 0,2562 | 0,0157 | 0,2255 | 0,018  | 0,2126 | 0,0185 | 0,2416 | 0,0173 | 0,2282 | 0,0212 | 0,2218 | 0,0247 |
| 4       | 0,0862 | 0,0095 | 0,086  | 0,0095 | 0,0761 | 0,0091 | 0,0863 | 0,0095 | 0,0859 | 0,0095 | 0,0852 | 0,0095 | 0,0863 | 0,0095 | 0,0863 | 0,0095 |
| 5       | 0,1889 | 0,0153 | 0,2016 | 0,016  | 0,1327 | 0,0157 | 0,1938 | 0,0169 | 0,2036 | 0,0166 | 0,1765 | 0,0175 | 0,1915 | 0,0198 | 0,1969 | 0,0214 |
| 6       | 0,2914 | 0,0276 | 0,3322 | 0,0319 | 0,1627 | 0,0254 | 0,3063 | 0,0353 | 0,3395 | 0,0359 | 0,2572 | 0,0351 | 0,299  | 0,0473 | 0,3162 | 0,0566 |
| Mean    | 3,9081 | 0,1536 | 4,1441 | 0,1646 | 2,9809 | 0,2054 | 3,9972 | 0,1966 | 4,1842 | 0,1845 | 3,692  | 0,2204 | 3,9543 | 0,2734 | 4,0547 | 0,3179 |
| fabq110 |        |        |        |        |        |        |        |        |        |        |        |        |        |        |        |        |
| 0       | 0,3529 | 0,034  | 0,1373 | 0,0288 | 0,7044 | 0,0424 | 0,356  | 0,0428 | 0,2406 | 0,0363 | 0,5082 | 0,0572 | 0,1614 | 0,0421 | 0,2064 | 0,0519 |
| 1       | 0,104  | 0,0122 | 0,0561 | 0,01   | 0,1218 | 0,0135 | 0,1045 | 0,0129 | 0,0826 | 0,0117 | 0,122  | 0,0138 | 0,063  | 0,0132 | 0,0746 | 0,0147 |
| 2       | 0,0719 | 0,0098 | 0,0538 | 0,0085 | 0,0494 | 0,0087 | 0,0719 | 0,0098 | 0,0665 | 0,0094 | 0,0687 | 0,0098 | 0,0577 | 0,0098 | 0,0633 | 0,0101 |
| 3       | 0,2018 | 0,0162 | 0,2096 | 0,0165 | 0,0814 | 0,0178 | 0,2011 | 0,0172 | 0,2177 | 0,0163 | 0,1571 | 0,022  | 0,2144 | 0,0171 | 0,2182 | 0,0163 |
| 4       | 0,1066 | 0,0131 | 0,1536 | 0,016  | 0,0252 | 0,008  | 0,1058 | 0,0146 | 0,134  | 0,0155 | 0,0676 | 0,0151 | 0,15   | 0,0166 | 0,1415 | 0,0177 |
| 5       | 0,0808 | 0,0126 | 0,1615 | 0,0209 | 0,0112 | 0,0046 | 0,0798 | 0,0147 | 0,1183 | 0,0177 | 0,0417 | 0,0127 | 0,1506 | 0,0238 | 0,1316 | 0,0244 |
| 6       | 0,0822 | 0,0153 | 0,228  | 0,033  | 0,0067 | 0,0034 | 0,0809 | 0,0184 | 0,1403 | 0,0253 | 0,0346 | 0,0132 | 0,2029 | 0,0424 | 0,1644 | 0,0407 |
| Mean    | 2,1761 | 0,1733 | 3,5826 | 0,2209 | 0,6617 | 0,1376 | 2,1592 | 0,2218 | 2,8377 | 0,2244 | 1,4175 | 0,2486 | 3,3923 | 0,3151 | 3,0661 | 0,3509 |
| fabq120 |        |        |        |        |        |        |        |        |        |        |        |        |        |        |        |        |
| 0       | 0,3173 | 0,0329 | 0,1574 | 0,0311 | 0,9074 | 0,0297 | 0,5177 | 0,046  | 0,2871 | 0,0391 | 0,6806 | 0,0682 | 0,2081 | 0,0475 | 0,1317 | 0,046  |
| 1       | 0,112  | 0,0131 | 0,0708 | 0,0118 | 0,0737 | 0,018  | 0,1395 | 0,0152 | 0,1056 | 0,0138 | 0,139  | 0,0156 | 0,0859 | 0,0156 | 0,0623 | 0,0169 |



|         |        |        |        |        |        |        |        |        |        |        |        |        |        |        |        |        |
|---------|--------|--------|--------|--------|--------|--------|--------|--------|--------|--------|--------|--------|--------|--------|--------|--------|
| 2       | 0,0712 | 0,0104 | 0,0573 | 0,0093 | 0,0108 | 0,0058 | 0,0677 | 0,0102 | 0,0699 | 0,0103 | 0,0511 | 0,0116 | 0,0638 | 0,0105 | 0,053  | 0,0112 |
| 3       | 0,2074 | 0,0175 | 0,2125 | 0,0175 | 0,0072 | 0,0059 | 0,1506 | 0,0193 | 0,2122 | 0,0177 | 0,0861 | 0,0287 | 0,2171 | 0,0176 | 0,2067 | 0,0206 |
| 4       | 0,0885 | 0,0123 | 0,1155 | 0,015  | 0,0007 | 0,0008 | 0,0491 | 0,0103 | 0,0943 | 0,0135 | 0,0213 | 0,0105 | 0,1083 | 0,0154 | 0,1181 | 0,0154 |
| 5       | 0,097  | 0,0145 | 0,1611 | 0,0217 | 0,0002 | 0,0002 | 0,041  | 0,0108 | 0,1076 | 0,0176 | 0,0135 | 0,0086 | 0,1387 | 0,0244 | 0,1732 | 0,0285 |
| 6       | 0,1066 | 0,0183 | 0,2255 | 0,0337 | 0      | 0,0001 | 0,0344 | 0,0113 | 0,1233 | 0,0244 | 0,0086 | 0,0068 | 0,1781 | 0,0405 | 0,255  | 0,0578 |
| Mean    | 2,3552 | 0,1774 | 3,443  | 0,2321 | 0,121  | 0,0502 | 1,3346 | 0,1955 | 2,537  | 0,23   | 0,7032 | 0,2295 | 3,0603 | 0,3305 | 3,6569 | 0,3884 |
| fabq140 |        |        |        |        |        |        |        |        |        |        |        |        |        |        |        |        |
| 0       | 0,3462 | 0,0334 | 0,229  | 0,0345 | 0,9759 | 0,0168 | 0,6133 | 0,0433 | 0,3764 | 0,0424 | 0,6971 | 0,0659 | 0,2456 | 0,0518 | 0,1745 | 0,0557 |
| 1       | 0,1178 | 0,0135 | 0,0905 | 0,0126 | 0,0228 | 0,015  | 0,1458 | 0,0154 | 0,1235 | 0,0147 | 0,1414 | 0,016  | 0,0949 | 0,0163 | 0,0747 | 0,0185 |
| 2       | 0,0868 | 0,0115 | 0,0774 | 0,0108 | 0,0012 | 0,0016 | 0,0751 | 0,011  | 0,0877 | 0,0116 | 0,0621 | 0,0139 | 0,0793 | 0,0118 | 0,0693 | 0,013  |
| 3       | 0,1158 | 0,0135 | 0,1199 | 0,0138 | 0,0001 | 0,0002 | 0,07   | 0,0122 | 0,1128 | 0,0136 | 0,0494 | 0,0173 | 0,1202 | 0,0138 | 0,1163 | 0,0144 |
| 4       | 0,0871 | 0,0125 | 0,1048 | 0,0144 | 0      | 0      | 0,0368 | 0,009  | 0,0818 | 0,0128 | 0,0222 | 0,0111 | 0,1027 | 0,015  | 0,1101 | 0,0152 |
| 5       | 0,0923 | 0,014  | 0,1288 | 0,0185 | 0      | 0      | 0,0272 | 0,0084 | 0,0835 | 0,0151 | 0,014  | 0,0091 | 0,1234 | 0,0218 | 0,1468 | 0,0253 |
| 6       | 0,154  | 0,0233 | 0,2497 | 0,0345 | 0      | 0      | 0,0318 | 0,0117 | 0,1344 | 0,0272 | 0,0139 | 0,0111 | 0,2339 | 0,0487 | 0,3084 | 0,0662 |
| Mean    | 2,3729 | 0,1907 | 3,166  | 0,2385 | 0,0255 | 0,0188 | 0,9798 | 0,175  | 2,188  | 0,2426 | 0,6558 | 0,232  | 3,0451 | 0,3628 | 3,5866 | 0,4411 |
| mdi1    |        |        |        |        |        |        |        |        |        |        |        |        |        |        |        |        |
| 0       | 0,7645 | 0,0403 | 0,1982 | 0,0339 | 0,9078 | 0,0323 | 0,4165 | 0,05   | 0,0889 | 0,0222 | 0,4809 | 0,0642 | 0,0016 | 0,0013 | 0,9841 | 0,0303 |
| 1       | 0,2323 | 0,039  | 0,6932 | 0,0265 | 0,0918 | 0,032  | 0,5508 | 0,0427 | 0,6788 | 0,0293 | 0,4962 | 0,0565 | 0,1717 | 0,0584 | 0,0159 | 0,0303 |
| 2       | 0,0032 | 0,0015 | 0,1086 | 0,0242 | 0,0004 | 0,0003 | 0,0326 | 0,0105 | 0,2323 | 0,0394 | 0,0229 | 0,0094 | 0,8267 | 0,0596 | 0      | 0      |
| Mean    | 0,2386 | 0,0416 | 0,9103 | 0,0526 | 0,0926 | 0,0326 | 0,6161 | 0,0582 | 1,1434 | 0,0569 | 0,542  | 0,0723 | 1,8251 | 0,0608 | 0,0159 | 0,0304 |
| mdi2    |        |        |        |        |        |        |        |        |        |        |        |        |        |        |        |        |
| 0       | 0,6365 | 0,039  | 0,1796 | 0,0309 | 0,9236 | 0,029  | 0,3844 | 0,0488 | 0,086  | 0,0222 | 0,5182 | 0,0599 | 0,003  | 0,0032 | 0,902  | 0,0592 |
| 1       | 0,3326 | 0,0321 | 0,5362 | 0,0245 | 0,0753 | 0,0281 | 0,5001 | 0,031  | 0,4658 | 0,0333 | 0,4211 | 0,0429 | 0,1208 | 0,0593 | 0,0961 | 0,0569 |
| 2       | 0,0309 | 0,0089 | 0,2842 | 0,0373 | 0,0011 | 0,0009 | 0,1155 | 0,0263 | 0,4482 | 0,0496 | 0,0608 | 0,0201 | 0,8763 | 0,0624 | 0,0018 | 0,0023 |
| Mean    | 0,3944 | 0,0466 | 1,1046 | 0,064  | 0,0775 | 0,0298 | 0,7311 | 0,0721 | 1,3623 | 0,0693 | 0,5426 | 0,0784 | 1,8733 | 0,0656 | 0,0998 | 0,0615 |
| mdi3    |        |        |        |        |        |        |        |        |        |        |        |        |        |        |        |        |
| 0       | 0,2986 | 0,0324 | 0,0547 | 0,0112 | 0,6066 | 0,05   | 0,1744 | 0,0284 | 0,0231 | 0,0067 | 0,1523 | 0,0295 | 0,0012 | 0,0009 | 0,6191 | 0,0826 |
| 1       | 0,6035 | 0,0233 | 0,4042 | 0,0338 | 0,3783 | 0,0449 | 0,6092 | 0,0236 | 0,2469 | 0,0386 | 0,5952 | 0,0289 | 0,0318 | 0,0163 | 0,367  | 0,0747 |
| 2       | 0,0708 | 0,0124 | 0,1731 | 0,0172 | 0,0137 | 0,005  | 0,1235 | 0,0164 | 0,1528 | 0,0168 | 0,1349 | 0,0185 | 0,0481 | 0,0157 | 0,0126 | 0,0072 |
| 3       | 0,0224 | 0,0072 | 0,1999 | 0,0224 | 0,0013 | 0,0008 | 0,0674 | 0,0156 | 0,2548 | 0,0257 | 0,0824 | 0,0209 | 0,1961 | 0,0302 | 0,0012 | 0,0011 |
| 4       | 0,0047 | 0,0023 | 0,1519 | 0,0254 | 0,0001 | 0,0001 | 0,0242 | 0,0088 | 0,2798 | 0,0374 | 0,0332 | 0,0133 | 0,5264 | 0,0463 | 0,0001 | 0,0001 |
| 5       | 0,0001 | 0,0001 | 0,0161 | 0,0057 | 0      | 0      | 0,0012 | 0,0007 | 0,0427 | 0,0134 | 0,0019 | 0,0011 | 0,1963 | 0,0455 | 0      | 0      |
| Mean    | 0,8313 | 0,059  | 2,0382 | 0,1188 | 0,41   | 0,0561 | 1,1615 | 0,0915 | 2,6492 | 0,1487 | 1,2544 | 0,1207 | 3,8037 | 0,138  | 0,3961 | 0,0919 |
| mdi4    |        |        |        |        |        |        |        |        |        |        |        |        |        |        |        |        |
| 0       | 0,887  | 0,0273 | 0,4039 | 0,044  | 0,9967 | 0,0101 | 0,7256 | 0,0441 | 0,3867 | 0,0455 | 0,7738 | 0,0517 | 0,0364 | 0,0178 | 0,9988 | 0,0052 |
| 1       | 0,1078 | 0,0247 | 0,4207 | 0,0286 | 0,0033 | 0,01   | 0,2421 | 0,0342 | 0,4257 | 0,0281 | 0,2045 | 0,0417 | 0,254  | 0,0478 | 0,0012 | 0,0052 |
| 2       | 0,0052 | 0,0028 | 0,1754 | 0,031  | 0      | 0      | 0,0323 | 0,0118 | 0,1876 | 0,0345 | 0,0216 | 0,0109 | 0,7096 | 0,0641 | 0      | 0      |
| Mean    | 0,1182 | 0,0299 | 0,7715 | 0,0706 | 0,0033 | 0,0101 | 0,3068 | 0,0548 | 0,8009 | 0,0758 | 0,2478 | 0,0621 | 1,6732 | 0,081  | 0,0012 | 0,0052 |

### Loadings , 8-DP

The quantities reported under Clusters are simply correlations, representing the square root of the corresponding 'R<sup>2</sup>' or communality of the associated indicator.

Correlations: These are standardised values for the loadings reported in the Loadings output. They represent correlations between the indicators and factors.

| Loadings | Clusters | R <sup>2</sup> |
|----------|----------|----------------|
| okon0    | 0,3459   | 0,1196         |
| okom0    | 0,232    | 0,0538         |
| oens0    | 0,4708   | 0,2217         |
| obeh0    | 0,674    | 0,4543         |
| start50  | 0,2288   | 0,0524         |
| start60  | 0,5231   | 0,2736         |
| start70  | 0,2817   | 0,0793         |
| start80  | 0,4302   | 0,1851         |
| rm150    | 0,5966   | 0,356          |
| rm170    | 0,4636   | 0,2149         |
| rm210    | 0,2777   | 0,0771         |
| rm230    | 0,3127   | 0,0978         |
| fabq30   | 0,223    | 0,0497         |
| fabq40   | 0,1938   | 0,0375         |
| fabq110  | 0,4398   | 0,1935         |
| fabq120  | 0,5408   | 0,2925         |
| fabq140  | 0,5152   | 0,2654         |
| mdi1     | 0,7091   | 0,5028         |
| mdi2     | 0,6758   | 0,4567         |
| mdi3     | 0,7058   | 0,4982         |
| mdi4     | 0,6495   | 0,4218         |
| mdi5     | 0,5978   | 0,3574         |
| mdi7     | 0,5728   | 0,3281         |
| mdi8     | 0,661    | 0,437          |
| mdi9     | 0,5563   | 0,3095         |
| mdi10    | 0,4992   | 0,2492         |

**Profiles in numbers – psychology domain, single-item strategy, 9-domain profiles**

The first row of numbers shows how large each cluster is. The body of the table contains (marginal) conditional probabilities that show how the clusters are related to the Nominal or Ordinal indicator variables. These probabilities sum to 1 within each cluster (column).

For indicators specified as Continuous, the body of the table contains means instead of probabilities. For indicators specified as Ordinal, means are displayed in addition to the conditional probabilities.

| 9-DP         | Cluster 1 | s.e.   | Cluster 2 | s.e.   | Cluster 3 | s.e.   | Cluster4 | s.e.   | Cluster 5 | s.e.   | Cluster 6 | s.e.   | Cluster 7 | s.e.   | Cluster 8 | s.e.   | Cluster 9 | s.e.   |
|--------------|-----------|--------|-----------|--------|-----------|--------|----------|--------|-----------|--------|-----------|--------|-----------|--------|-----------|--------|-----------|--------|
| Cluster Size | 20,65%    | 0,0151 | 14,43%    | 0,0137 | 12,95%    | 0,0131 | 12,81%   | 0,0138 | 12,36%    | 0,013  | 8,75%     | 0,012  | 8,57%     | 0,0124 | 4,87%     | 0,0088 | 4,60%     | 0,0076 |
| Indicators   |           |        |           |        |           |        |          |        |           |        |           |        |           |        |           |        |           |        |
| okon0        |           |        |           |        |           |        |          |        |           |        |           |        |           |        |           |        |           |        |
| Mean         | 5,617     | 0,2044 | 7,4341    | 0,2014 | 6,5164    | 0,1973 | 6,2463   | 0,2097 | 5,2503    | 0,2671 | 5,6882    | 0,2746 | 4,6265    | 0,2801 | 4,9242    | 0,4546 | 4,7979    | 0,3217 |
| okom0        |           |        |           |        |           |        |          |        |           |        |           |        |           |        |           |        |           |        |
| 0            | 0,8273    | 0,0294 | 0,8397    | 0,0373 | 0,6885    | 0,0473 | 0,6965   | 0,0472 | 0,6566    | 0,0476 | 0,6591    | 0,0625 | 0,6012    | 0,0642 | 0,856     | 0,0608 | 0,4164    | 0,0801 |
| 1            | 0,1727    | 0,0294 | 0,1603    | 0,0373 | 0,3115    | 0,0473 | 0,3035   | 0,0472 | 0,3434    | 0,0476 | 0,3409    | 0,0625 | 0,3988    | 0,0642 | 0,144     | 0,0608 | 0,5836    | 0,0801 |
| oens0        |           |        |           |        |           |        |          |        |           |        |           |        |           |        |           |        |           |        |
| 0            | 0,9357    | 0,0193 | 0,9216    | 0,0266 | 0,6323    | 0,049  | 0,8068   | 0,0447 | 0,701     | 0,0462 | 0,3765    | 0,0637 | 0,5078    | 0,0666 | 0,9722    | 0,0291 | 0,2281    | 0,0742 |
| 1            | 0,0643    | 0,0193 | 0,0784    | 0,0266 | 0,3677    | 0,049  | 0,1932   | 0,0447 | 0,299     | 0,0462 | 0,6235    | 0,0637 | 0,4922    | 0,0666 | 0,0278    | 0,0291 | 0,7719    | 0,0742 |
| obeh0        |           |        |           |        |           |        |          |        |           |        |           |        |           |        |           |        |           |        |
| Mean         | 0         | 0,0058 | 4,1149    | 0,2778 | 4,9163    | 0,3211 | 4,7962   | 0,2916 | 0         | 0,0096 | 4,4688    | 0,3622 | 4,4328    | 0,4214 | 5,7662    | 0,5975 | 3,4074    | 0,4696 |
| start50      |           |        |           |        |           |        |          |        |           |        |           |        |           |        |           |        |           |        |
| 0            | 0,8515    | 0,027  | 0,9536    | 0,0202 | 0,9285    | 0,0263 | 0,8021   | 0,042  | 0,762     | 0,043  | 0,8517    | 0,0477 | 0,6299    | 0,0645 | 0,845     | 0,064  | 0,5968    | 0,0794 |
| 1            | 0,1485    | 0,027  | 0,0464    | 0,0202 | 0,0715    | 0,0263 | 0,1979   | 0,042  | 0,238     | 0,043  | 0,1483    | 0,0477 | 0,3701    | 0,0645 | 0,155     | 0,064  | 0,4032    | 0,0794 |
| start60      |           |        |           |        |           |        |          |        |           |        |           |        |           |        |           |        |           |        |
| 0            | 0,9115    | 0,0225 | 0,9784    | 0,0144 | 0,9214    | 0,0285 | 0,7385   | 0,0458 | 0,528     | 0,0516 | 0,5904    | 0,0649 | 0,4965    | 0,0676 | 0,9988    | 0,0075 | 0,1106    | 0,056  |
| 1            | 0,0885    | 0,0225 | 0,0216    | 0,0144 | 0,0786    | 0,0285 | 0,2615   | 0,0458 | 0,472     | 0,0516 | 0,4096    | 0,0649 | 0,5035    | 0,0676 | 0,0012    | 0,0075 | 0,8894    | 0,056  |
| start70      |           |        |           |        |           |        |          |        |           |        |           |        |           |        |           |        |           |        |
| 0            | 0,988     | 0,0092 | 0,992     | 0,0086 | 0,9511    | 0,023  | 0,9818   | 0,0141 | 0,8486    | 0,0355 | 0,9803    | 0,0239 | 0,7994    | 0,0507 | 0,9799    | 0,0231 | 0,6698    | 0,0771 |
| 1            | 0,012     | 0,0092 | 0,008     | 0,0086 | 0,0489    | 0,023  | 0,0182   | 0,0141 | 0,1514    | 0,0355 | 0,0197    | 0,0239 | 0,2006    | 0,0507 | 0,0201    | 0,0231 | 0,3302    | 0,0771 |
| start80      |           |        |           |        |           |        |          |        |           |        |           |        |           |        |           |        |           |        |
| 0            | 0,7       | 0,0354 | 0,9426    | 0,0244 | 0,7538    | 0,0444 | 0,5356   | 0,056  | 0,3966    | 0,0509 | 0,4338    | 0,064  | 0,3588    | 0,0638 | 0,5853    | 0,0881 | 0,136     | 0,0566 |
| 1            | 0,3       | 0,0354 | 0,0574    | 0,0244 | 0,2462    | 0,0444 | 0,4644   | 0,056  | 0,6034    | 0,0509 | 0,5662    | 0,064  | 0,6412    | 0,0638 | 0,4147    | 0,0881 | 0,864     | 0,0566 |
| rm150        |           |        |           |        |           |        |          |        |           |        |           |        |           |        |           |        |           |        |
| 0            | 0,3925    | 0,0381 | 0,6941    | 0,0452 | 0,98      | 0,0299 | 0,0008   | 0,0039 | 0,2156    | 0,0424 | 0,3242    | 0,0602 | 0,3244    | 0,0626 | 0,3464    | 0,0911 | 0,2852    | 0,0733 |
| 1            | 0,6075    | 0,0381 | 0,3059    | 0,0452 | 0,02      | 0,0299 | 0,9992   | 0,0039 | 0,7844    | 0,0424 | 0,6758    | 0,0602 | 0,6756    | 0,0626 | 0,6536    | 0,0911 | 0,7148    | 0,0733 |
| rm170        |           |        |           |        |           |        |          |        |           |        |           |        |           |        |           |        |           |        |
| 0            | 0,7655    | 0,0336 | 0,9199    | 0,027  | 0,8146    | 0,0391 | 0,5711   | 0,0524 | 0,4089    | 0,0497 | 0,3776    | 0,0651 | 0,4903    | 0,0654 | 0,8364    | 0,0666 | 0,0721    | 0,0446 |
| 1            | 0,2345    | 0,0336 | 0,0801    | 0,027  | 0,1854    | 0,0391 | 0,4289   | 0,0524 | 0,5911    | 0,0497 | 0,6224    | 0,0651 | 0,5097    | 0,0654 | 0,1636    | 0,0666 | 0,9279    | 0,0446 |
| rm210        |           |        |           |        |           |        |          |        |           |        |           |        |           |        |           |        |           |        |
| 0            | 0,6469    | 0,0379 | 0,7647    | 0,0407 | 0,5292    | 0,051  | 0,5634   | 0,0518 | 0,4168    | 0,0497 | 0,467     | 0,0642 | 0,3597    | 0,0653 | 0,7006    | 0,0794 | 0,289     | 0,0735 |
| 1            | 0,3531    | 0,0379 | 0,2353    | 0,0407 | 0,4708    | 0,051  | 0,4366   | 0,0518 | 0,5832    | 0,0497 | 0,533     | 0,0642 | 0,6403    | 0,0653 | 0,2994    | 0,0794 | 0,711     | 0,0735 |

|         |        |        |        |        |        |        |        |        |        |        |        |        |        |        |        |        |        |        |  |
|---------|--------|--------|--------|--------|--------|--------|--------|--------|--------|--------|--------|--------|--------|--------|--------|--------|--------|--------|--|
| rm230   |        |        |        |        |        |        |        |        |        |        |        |        |        |        |        |        |        |        |  |
| 0       | 0,9312 | 0,0196 | 0,973  | 0,0165 | 0,923  | 0,0285 | 0,8778 | 0,0356 | 0,737  | 0,0444 | 0,7822 | 0,0564 | 0,7178 | 0,0601 | 0,9349 | 0,0455 | 0,5136 | 0,0814 |  |
| 1       | 0,0688 | 0,0196 | 0,027  | 0,0165 | 0,077  | 0,0285 | 0,1222 | 0,0356 | 0,263  | 0,0444 | 0,2178 | 0,0564 | 0,2822 | 0,0601 | 0,0651 | 0,0455 | 0,4864 | 0,0814 |  |
| fabq30  |        |        |        |        |        |        |        |        |        |        |        |        |        |        |        |        |        |        |  |
| 0       | 0,2219 | 0,0259 | 0,3875 | 0,0392 | 0,2699 | 0,0361 | 0,3125 | 0,0386 | 0,2002 | 0,0317 | 0,2633 | 0,0435 | 0,0693 | 0,0211 | 0,2433 | 0,0548 | 0,1874 | 0,0461 |  |
| 1       | 0,1064 | 0,0119 | 0,1421 | 0,0143 | 0,1192 | 0,0137 | 0,1288 | 0,0141 | 0,1    | 0,013  | 0,1176 | 0,015  | 0,0482 | 0,0113 | 0,1124 | 0,0176 | 0,0959 | 0,017  |  |
| 2       | 0,0816 | 0,0093 | 0,0832 | 0,0095 | 0,0841 | 0,0096 | 0,0848 | 0,0096 | 0,0797 | 0,0094 | 0,0839 | 0,0096 | 0,0536 | 0,0094 | 0,0829 | 0,0098 | 0,0784 | 0,0101 |  |
| 3       | 0,3553 | 0,0181 | 0,2772 | 0,0243 | 0,3373 | 0,0213 | 0,3175 | 0,023  | 0,3614 | 0,0184 | 0,34   | 0,0232 | 0,3387 | 0,0241 | 0,3479 | 0,0256 | 0,3643 | 0,0193 |  |
| 4       | 0,0792 | 0,0104 | 0,0472 | 0,0084 | 0,0692 | 0,0106 | 0,0608 | 0,01   | 0,0839 | 0,0116 | 0,0706 | 0,0118 | 0,1095 | 0,0132 | 0,0747 | 0,0141 | 0,0867 | 0,014  |  |
| 5       | 0,0795 | 0,0121 | 0,0362 | 0,0083 | 0,064  | 0,0123 | 0,0524 | 0,011  | 0,0876 | 0,0151 | 0,0659 | 0,0147 | 0,1595 | 0,0234 | 0,0722 | 0,0192 | 0,0928 | 0,0211 |  |
| 6       | 0,076  | 0,0139 | 0,0265 | 0,0076 | 0,0563 | 0,0137 | 0,0431 | 0,0114 | 0,0872 | 0,019  | 0,0587 | 0,0169 | 0,2212 | 0,041  | 0,0665 | 0,0234 | 0,0946 | 0,0289 |  |
| Mean    | 2,5063 | 0,1446 | 1,6692 | 0,164  | 2,2337 | 0,1858 | 2,0149 | 0,1836 | 2,6403 | 0,1939 | 2,2695 | 0,2312 | 3,7344 | 0,2375 | 2,3808 | 0,3068 | 2,7237 | 0,2994 |  |
| fabq40  |        |        |        |        |        |        |        |        |        |        |        |        |        |        |        |        |        |        |  |
| 0       | 0,0839 | 0,0153 | 0,1856 | 0,0284 | 0,0755 | 0,0181 | 0,1034 | 0,0219 | 0,0639 | 0,0161 | 0,1384 | 0,0305 | 0,0141 | 0,0084 | 0,0667 | 0,0264 | 0,0672 | 0,0247 |  |
| 1       | 0,0548 | 0,0095 | 0,0963 | 0,0151 | 0,0507 | 0,0106 | 0,0639 | 0,0121 | 0,0447 | 0,0097 | 0,0788 | 0,0152 | 0,0137 | 0,0066 | 0,0462 | 0,0146 | 0,0464 | 0,0138 |  |
| 2       | 0,062  | 0,0091 | 0,0866 | 0,0118 | 0,0589 | 0,0098 | 0,0685 | 0,0106 | 0,0541 | 0,0094 | 0,0777 | 0,0119 | 0,023  | 0,0084 | 0,0553 | 0,0129 | 0,0555 | 0,0122 |  |
| 3       | 0,2355 | 0,0164 | 0,2614 | 0,016  | 0,2296 | 0,0184 | 0,2461 | 0,0174 | 0,2198 | 0,019  | 0,2572 | 0,0169 | 0,1299 | 0,0302 | 0,2224 | 0,0263 | 0,2228 | 0,0248 |  |
| 4       | 0,088  | 0,0097 | 0,0776 | 0,0092 | 0,0881 | 0,0097 | 0,087  | 0,0096 | 0,0879 | 0,0097 | 0,0838 | 0,0097 | 0,0721 | 0,0111 | 0,088  | 0,0097 | 0,088  | 0,0097 |  |
| 5       | 0,1906 | 0,0154 | 0,1336 | 0,0155 | 0,196  | 0,0171 | 0,1784 | 0,0171 | 0,2036 | 0,0169 | 0,1581 | 0,0192 | 0,2318 | 0,0161 | 0,2017 | 0,0218 | 0,2014 | 0,0208 |  |
| 6       | 0,2852 | 0,027  | 0,1589 | 0,0244 | 0,3012 | 0,0352 | 0,2526 | 0,0328 | 0,326  | 0,0363 | 0,2062 | 0,0354 | 0,5154 | 0,06   | 0,3197 | 0,0579 | 0,3186 | 0,0538 |  |
| Mean    | 3,9016 | 0,1497 | 2,9853 | 0,1971 | 3,9968 | 0,1954 | 3,695  | 0,2041 | 4,138  | 0,1895 | 3,3681 | 0,2535 | 4,9892 | 0,2155 | 4,1026 | 0,3183 | 4,0968 | 0,2951 |  |
| fabq110 |        |        |        |        |        |        |        |        |        |        |        |        |        |        |        |        |        |        |  |
| 0       | 0,3453 | 0,0335 | 0,7031 | 0,0421 | 0,3529 | 0,0429 | 0,4438 | 0,0475 | 0,2427 | 0,0381 | 0,3457 | 0,0587 | 0,0176 | 0,01   | 0,2047 | 0,0547 | 0,1065 | 0,0377 |  |
| 1       | 0,104  | 0,0122 | 0,1223 | 0,0136 | 0,1052 | 0,0129 | 0,1173 | 0,0136 | 0,0843 | 0,012  | 0,104  | 0,0146 | 0,0118 | 0,0054 | 0,0754 | 0,0154 | 0,0476 | 0,0131 |  |
| 2       | 0,0738 | 0,01   | 0,0501 | 0,0088 | 0,0739 | 0,01   | 0,073  | 0,01   | 0,069  | 0,0097 | 0,0738 | 0,0101 | 0,0188 | 0,0066 | 0,0655 | 0,0105 | 0,05   | 0,0105 |  |
| 3       | 0,212  | 0,0171 | 0,0832 | 0,0181 | 0,2101 | 0,0183 | 0,1841 | 0,0195 | 0,2288 | 0,0173 | 0,2119 | 0,0203 | 0,1207 | 0,0261 | 0,2303 | 0,0172 | 0,2132 | 0,0215 |  |
| 4       | 0,1121 | 0,0138 | 0,0254 | 0,0081 | 0,11   | 0,0155 | 0,0854 | 0,0147 | 0,1395 | 0,0167 | 0,1119 | 0,0191 | 0,1426 | 0,0191 | 0,149  | 0,0197 | 0,1672 | 0,0175 |  |
| 5       | 0,0809 | 0,0127 | 0,0106 | 0,0044 | 0,0786 | 0,0147 | 0,0541 | 0,0127 | 0,1162 | 0,0183 | 0,0807 | 0,0196 | 0,2301 | 0,025  | 0,1316 | 0,0262 | 0,1789 | 0,0272 |  |
| 6       | 0,0721 | 0,014  | 0,0054 | 0,0028 | 0,0693 | 0,0165 | 0,0423 | 0,0127 | 0,1195 | 0,024  | 0,0719 | 0,023  | 0,4584 | 0,0575 | 0,1435 | 0,0394 | 0,2366 | 0,051  |  |
| Mean    | 2,1726 | 0,1682 | 0,6591 | 0,1344 | 2,132  | 0,217  | 1,6818 | 0,2167 | 2,7648 | 0,23   | 2,17   | 0,3089 | 4,8828 | 0,2032 | 3,0122 | 0,3634 | 3,7701 | 0,3312 |  |
| fabq120 |        |        |        |        |        |        |        |        |        |        |        |        |        |        |        |        |        |        |  |
| 0       | 0,3153 | 0,0324 | 0,9126 | 0,0279 | 0,5251 | 0,0458 | 0,5426 | 0,0509 | 0,2921 | 0,041  | 0,4116 | 0,0608 | 0,0263 | 0,0129 | 0,1447 | 0,051  | 0,1569 | 0,046  |  |
| 1       | 0,1118 | 0,013  | 0,0704 | 0,0174 | 0,1398 | 0,015  | 0,1407 | 0,0151 | 0,1069 | 0,014  | 0,1283 | 0,0159 | 0,0182 | 0,0072 | 0,067  | 0,018  | 0,071  | 0,0161 |  |
| 2       | 0,0721 | 0,0105 | 0,0099 | 0,0053 | 0,0677 | 0,0102 | 0,0664 | 0,0102 | 0,0712 | 0,0105 | 0,0728 | 0,0106 | 0,0231 | 0,0072 | 0,0565 | 0,0115 | 0,0584 | 0,0108 |  |
| 3       | 0,2151 | 0,0182 | 0,0064 | 0,0052 | 0,1515 | 0,02   | 0,1447 | 0,0217 | 0,2193 | 0,0186 | 0,1908 | 0,023  | 0,1347 | 0,0254 | 0,22   | 0,0203 | 0,2223 | 0,0194 |  |
| 4       | 0,0924 | 0,0129 | 0,0006 | 0,0007 | 0,0489 | 0,0105 | 0,0455 | 0,011  | 0,0973 | 0,0144 | 0,0721 | 0,0153 | 0,1133 | 0,0163 | 0,1235 | 0,0169 | 0,1219 | 0,0166 |  |
| 5       | 0,0974 | 0,0146 | 0,0001 | 0,0002 | 0,0386 | 0,0104 | 0,035  | 0,011  | 0,1058 | 0,0182 | 0,0667 | 0,0186 | 0,2338 | 0,0263 | 0,1699 | 0,0307 | 0,1638 | 0,0279 |  |
| 6       | 0,0958 | 0,0171 | 0      | 0      | 0,0285 | 0,0097 | 0,0252 | 0,01   | 0,1074 | 0,0235 | 0,0577 | 0,0207 | 0,4506 | 0,0556 | 0,2184 | 0,0555 | 0,2057 | 0,0477 |  |
| Mean    | 2,3329 | 0,172  | 0,1126 | 0,0459 | 1,2893 | 0,1885 | 1,2155 | 0,2073 | 2,4696 | 0,2366 | 1,8143 | 0,3    | 4,7946 | 0,2152 | 3,4939 | 0,4074 | 3,3956 | 0,3556 |  |
| fabq140 |        |        |        |        |        |        |        |        |        |        |        |        |        |        |        |        |        |        |  |
| 0       | 0,3512 | 0,0329 | 0,9778 | 0,0165 | 0,6143 | 0,0431 | 0,6023 | 0,0471 | 0,3884 | 0,0437 | 0,3621 | 0,0541 | 0,1071 | 0,0312 | 0,2008 | 0,0607 | 0,2424 | 0,0577 |  |
| 1       | 0,1184 | 0,0134 | 0,0211 | 0,0149 | 0,1454 | 0,0152 | 0,1454 | 0,0152 | 0,1252 | 0,0148 | 0,1205 | 0,0158 | 0,0518 | 0,0124 | 0,0824 | 0,0191 | 0,0938 | 0,0176 |  |
| 2       | 0,0865 | 0,0114 | 0,001  | 0,0014 | 0,0746 | 0,0109 | 0,0761 | 0,0111 | 0,0874 | 0,0115 | 0,0869 | 0,0115 | 0,0544 | 0,0105 | 0,0732 | 0,0128 | 0,0786 | 0,012  |  |

|      |        |        |        |        |        |        |        |        |        |        |        |        |        |        |        |        |        |        |
|------|--------|--------|--------|--------|--------|--------|--------|--------|--------|--------|--------|--------|--------|--------|--------|--------|--------|--------|
| 3    | 0,1157 | 0,0135 | 0,0001 | 0,0002 | 0,07   | 0,0122 | 0,0728 | 0,013  | 0,1117 | 0,0136 | 0,1147 | 0,0141 | 0,1044 | 0,0142 | 0,119  | 0,0141 | 0,1206 | 0,0138 |
| 4    | 0,0872 | 0,0125 | 0      | 0      | 0,0371 | 0,009  | 0,0393 | 0,0099 | 0,0805 | 0,0129 | 0,0853 | 0,0144 | 0,113  | 0,015  | 0,1091 | 0,0157 | 0,1043 | 0,0156 |
| 5    | 0,0916 | 0,0139 | 0      | 0      | 0,0273 | 0,0083 | 0,0296 | 0,0095 | 0,0808 | 0,0152 | 0,0884 | 0,0185 | 0,1705 | 0,0228 | 0,1394 | 0,0259 | 0,1256 | 0,0237 |
| 6    | 0,1493 | 0,0227 | 0      | 0      | 0,0312 | 0,0114 | 0,0345 | 0,0134 | 0,1259 | 0,0269 | 0,1421 | 0,0355 | 0,3988 | 0,0521 | 0,2761 | 0,0649 | 0,2348 | 0,0542 |
| Mean | 2,3416 | 0,1867 | 0,0234 | 0,0183 | 0,9769 | 0,1732 | 1,0282 | 0,1963 | 2,1166 | 0,2468 | 2,2744 | 0,3206 | 4,171  | 0,2863 | 3,376  | 0,4577 | 3,0663 | 0,4071 |
| mdi1 |        |        |        |        |        |        |        |        |        |        |        |        |        |        |        |        |        |        |
| 0    | 0,7531 | 0,0382 | 0,8985 | 0,0316 | 0,4092 | 0,0494 | 0,4831 | 0,0531 | 0,0807 | 0,0215 | 0,069  | 0,0235 | 0,2705 | 0,0524 | 0,9922 | 0,0279 | 0,001  | 0,0009 |
| 1    | 0,2436 | 0,037  | 0,101  | 0,0312 | 0,5587 | 0,0426 | 0,4955 | 0,0472 | 0,6786 | 0,0306 | 0,6627 | 0,037  | 0,6613 | 0,0379 | 0,0078 | 0,0279 | 0,1399 | 0,0607 |
| 2    | 0,0033 | 0,0015 | 0,0005 | 0,0003 | 0,0322 | 0,0105 | 0,0214 | 0,0079 | 0,2406 | 0,0403 | 0,2683 | 0,0526 | 0,0682 | 0,0224 | 0      | 0      | 0,8592 | 0,0616 |
| Mean | 0,2503 | 0,0394 | 0,102  | 0,0319 | 0,623  | 0,0574 | 0,5383 | 0,0594 | 1,1599 | 0,0568 | 1,1993 | 0,0726 | 0,7977 | 0,0711 | 0,0078 | 0,028  | 1,8582 | 0,0625 |
| mdi2 |        |        |        |        |        |        |        |        |        |        |        |        |        |        |        |        |        |        |
| 0    | 0,6282 | 0,038  | 0,9167 | 0,0283 | 0,3695 | 0,0469 | 0,5179 | 0,0499 | 0,0767 | 0,0209 | 0,0852 | 0,0263 | 0,2272 | 0,0488 | 0,899  | 0,0583 | 0,0002 | 0,0004 |
| 1    | 0,3412 | 0,0315 | 0,0821 | 0,0275 | 0,513  | 0,0305 | 0,4246 | 0,037  | 0,4627 | 0,0348 | 0,4759 | 0,0388 | 0,5517 | 0,0246 | 0,0992 | 0,0562 | 0,0355 | 0,0352 |
| 2    | 0,0306 | 0,0086 | 0,0012 | 0,0009 | 0,1176 | 0,0257 | 0,0575 | 0,0167 | 0,4606 | 0,0505 | 0,439  | 0,0599 | 0,2211 | 0,048  | 0,0018 | 0,0022 | 0,9643 | 0,0357 |
| Mean | 0,4024 | 0,0452 | 0,0845 | 0,0292 | 0,7481 | 0,0693 | 0,5395 | 0,0646 | 1,3839 | 0,0689 | 1,3538 | 0,084  | 0,9939 | 0,0936 | 0,1028 | 0,0605 | 1,9641 | 0,0361 |
| mdi3 |        |        |        |        |        |        |        |        |        |        |        |        |        |        |        |        |        |        |
| 0    | 0,2952 | 0,0317 | 0,5901 | 0,0464 | 0,1711 | 0,0274 | 0,1495 | 0,025  | 0,0206 | 0,0062 | 0,0264 | 0,0082 | 0,0703 | 0,0165 | 0,643  | 0,084  | 0,0005 | 0,0005 |
| 1    | 0,6049 | 0,023  | 0,393  | 0,0413 | 0,6082 | 0,0235 | 0,5937 | 0,0263 | 0,2309 | 0,0381 | 0,2697 | 0,0448 | 0,458  | 0,0434 | 0,3452 | 0,0769 | 0,0174 | 0,0115 |
| 2    | 0,0723 | 0,0124 | 0,0153 | 0,0051 | 0,126  | 0,0164 | 0,1375 | 0,0169 | 0,1511 | 0,0171 | 0,1604 | 0,0178 | 0,1739 | 0,0176 | 0,0108 | 0,0065 | 0,0332 | 0,0144 |
| 3    | 0,0228 | 0,0072 | 0,0016 | 0,0009 | 0,0691 | 0,0155 | 0,0842 | 0,0177 | 0,2615 | 0,0259 | 0,2523 | 0,0264 | 0,1747 | 0,0264 | 0,0009 | 0,0009 | 0,1674 | 0,0351 |
| 4    | 0,0047 | 0,0022 | 0,0001 | 0,0001 | 0,0245 | 0,0086 | 0,0333 | 0,0112 | 0,2923 | 0,0383 | 0,2564 | 0,0416 | 0,1133 | 0,0285 | 0      | 0,0001 | 0,5448 | 0,0456 |
| 5    | 0,0001 | 0,0001 | 0      | 0      | 0,0012 | 0,0006 | 0,0018 | 0,0009 | 0,0436 | 0,0138 | 0,0348 | 0,0124 | 0,0098 | 0,0044 | 0      | 0      | 0,2366 | 0,0559 |
| Mean | 0,8372 | 0,0579 | 0,4287 | 0,0526 | 1,1711 | 0,089  | 1,2635 | 0,0981 | 2,7049 | 0,1483 | 2,5468 | 0,1719 | 1,8322 | 0,1549 | 0,3697 | 0,0922 | 3,9483 | 0,1398 |
| mdi4 |        |        |        |        |        |        |        |        |        |        |        |        |        |        |        |        |        |        |
| 0    | 0,8814 | 0,0266 | 0,9921 | 0,0093 | 0,7084 | 0,0443 | 0,7755 | 0,046  | 0,3604 | 0,0456 | 0,2439 | 0,0477 | 0,5173 | 0,0586 | 0,9989 | 0,0051 | 0,0109 | 0,0089 |
| 1    | 0,1134 | 0,0242 | 0,0079 | 0,0093 | 0,2584 | 0,0348 | 0,2053 | 0,038  | 0,4455 | 0,0291 | 0,4559 | 0,0284 | 0,3829 | 0,0367 | 0,0011 | 0,0051 | 0,16   | 0,0569 |
| 2    | 0,0051 | 0,0026 | 0      | 0,0001 | 0,0332 | 0,0117 | 0,0192 | 0,009  | 0,1941 | 0,0354 | 0,3003 | 0,0511 | 0,0999 | 0,029  | 0      | 0      | 0,8291 | 0,0655 |
| Mean | 0,1237 | 0,0289 | 0,0079 | 0,0094 | 0,3249 | 0,0547 | 0,2437 | 0,0543 | 0,8337 | 0,0762 | 1,0564 | 0,0947 | 0,5826 | 0,0848 | 0,0011 | 0,0051 | 1,8182 | 0,0741 |
| mdi5 |        |        |        |        |        |        |        |        |        |        |        |        |        |        |        |        |        |        |
| 0    | 0,7586 | 0,0328 | 0,9202 | 0,026  | 0,6397 | 0,045  | 0,6244 | 0,0464 | 0,2127 | 0,0376 | 0,1941 | 0,0439 | 0,4233 | 0,0594 | 0,9726 | 0,028  | 0,0578 | 0,026  |
| 1    | 0,2089 | 0,0248 | 0,0762 | 0,0237 | 0,2873 | 0,0293 | 0,2962 | 0,0293 | 0,3877 | 0,0235 | 0,3816 | 0,0256 | 0,3819 | 0,026  | 0,0269 | 0,0271 | 0,2634 | 0,0455 |
| 2    | 0,0325 | 0,0097 | 0,0036 | 0,0024 | 0,073  | 0,0194 | 0,0794 | 0,0211 | 0,3997 | 0,0466 | 0,4243 | 0,0582 | 0,1948 | 0,0444 | 0,0004 | 0,0009 | 0,6787 | 0,0697 |
| Mean | 0,2739 | 0,0416 | 0,0834 | 0,0283 | 0,4333 | 0,0628 | 0,4551 | 0,0658 | 1,187  | 0,0814 | 1,2301 | 0,0999 | 0,7715 | 0,1015 | 0,0278 | 0,0288 | 1,6209 | 0,0948 |
| mdi7 |        |        |        |        |        |        |        |        |        |        |        |        |        |        |        |        |        |        |
| 0    | 0,8058 | 0,0303 | 0,9434 | 0,0228 | 0,7768 | 0,0396 | 0,696  | 0,0458 | 0,3754 | 0,0452 | 0,294  | 0,0543 | 0,6088 | 0,0588 | 0,9334 | 0,041  | 0,057  | 0,0263 |
| 1    | 0,1772 | 0,0253 | 0,0552 | 0,0216 | 0,2007 | 0,032  | 0,2614 | 0,0338 | 0,4203 | 0,0271 | 0,4313 | 0,0262 | 0,3188 | 0,0382 | 0,0646 | 0,0386 | 0,2922 | 0,0498 |
| 2    | 0,0169 | 0,006  | 0,0014 | 0,0012 | 0,0225 | 0,0088 | 0,0426 | 0,0144 | 0,2043 | 0,0352 | 0,2746 | 0,0515 | 0,0725 | 0,0245 | 0,0019 | 0,0024 | 0,6508 | 0,0739 |
| Mean | 0,2111 | 0,0357 | 0,058  | 0,0239 | 0,2457 | 0,0477 | 0,3466 | 0,0589 | 0,8289 | 0,0764 | 0,9806 | 0,1026 | 0,4637 | 0,0815 | 0,0685 | 0,0434 | 1,5938 | 0,0991 |
| mdi8 |        |        |        |        |        |        |        |        |        |        |        |        |        |        |        |        |        |        |
| 0    | 0,4486 | 0,0383 | 0,6962 | 0,0439 | 0,2946 | 0,0413 | 0,1984 | 0,0398 | 0,0256 | 0,0086 | 0,0131 | 0,0066 | 0,0902 | 0,0261 | 0,6256 | 0,0833 | 0,0003 | 0,0004 |
| 1    | 0,499  | 0,0302 | 0,2922 | 0,0401 | 0,5928 | 0,0275 | 0,6192 | 0,0233 | 0,3959 | 0,0431 | 0,3069 | 0,0574 | 0,5699 | 0,0362 | 0,3554 | 0,073  | 0,0558 | 0,0374 |
| 2    | 0,0524 | 0,0126 | 0,0116 | 0,0044 | 0,1126 | 0,0242 | 0,1824 | 0,0381 | 0,5785 | 0,0503 | 0,68   | 0,0635 | 0,34   | 0,0561 | 0,0191 | 0,0109 | 0,9439 | 0,0378 |
| Mean | 0,6038 | 0,0485 | 0,3154 | 0,0479 | 0,818  | 0,0619 | 0,9841 | 0,0744 | 1,5529 | 0,0578 | 1,667  | 0,0697 | 1,2498 | 0,0797 | 0,3935 | 0,0937 | 1,9436 | 0,0382 |

|       |        |        |        |        |        |        |        |        |        |        |        |        |        |        |        |        |        |        |  |
|-------|--------|--------|--------|--------|--------|--------|--------|--------|--------|--------|--------|--------|--------|--------|--------|--------|--------|--------|--|
| mdi9  |        |        |        |        |        |        |        |        |        |        |        |        |        |        |        |        |        |        |  |
| 0     | 0,3336 | 0,0293 | 0,5439 | 0,043  | 0,7645 | 0,0426 | 0,128  | 0,0216 | 0,1068 | 0,0194 | 0,1361 | 0,0262 | 0,1992 | 0,0341 | 0,3067 | 0,0615 | 0,0421 | 0,0154 |  |
| 1     | 0,4513 | 0,0207 | 0,387  | 0,0281 | 0,2224 | 0,0371 | 0,3262 | 0,0285 | 0,2954 | 0,0291 | 0,3368 | 0,0334 | 0,4002 | 0,0295 | 0,4485 | 0,0224 | 0,1644 | 0,0396 |  |
| 2     | 0,1087 | 0,0125 | 0,049  | 0,0112 | 0,0115 | 0,0048 | 0,1481 | 0,0143 | 0,1456 | 0,0143 | 0,1484 | 0,0143 | 0,1431 | 0,0147 | 0,1168 | 0,0204 | 0,1144 | 0,0175 |  |
| 3     | 0,0639 | 0,011  | 0,0152 | 0,0058 | 0,0015 | 0,001  | 0,1641 | 0,0188 | 0,1752 | 0,0191 | 0,1596 | 0,02   | 0,125  | 0,0202 | 0,0742 | 0,0246 | 0,1945 | 0,0194 |  |
| 4     | 0,0356 | 0,0089 | 0,0044 | 0,0024 | 0,0002 | 0,0002 | 0,1721 | 0,0262 | 0,1995 | 0,0282 | 0,1626 | 0,0303 | 0,1034 | 0,0256 | 0,0447 | 0,0224 | 0,3129 | 0,0418 |  |
| 5     | 0,0068 | 0,0025 | 0,0004 | 0,0003 | 0      | 0      | 0,0616 | 0,0153 | 0,0775 | 0,0182 | 0,0565 | 0,017  | 0,0291 | 0,0109 | 0,0092 | 0,0064 | 0,1717 | 0,0417 |  |
| Mean  | 1,0368 | 0,0837 | 0,5506 | 0,071  | 0,2505 | 0,0494 | 2,1108 | 0,1552 | 2,2978 | 0,1593 | 2,0453 | 0,1902 | 1,6206 | 0,181  | 1,1293 | 0,2146 | 3,0869 | 0,2406 |  |
| mdi10 |        |        |        |        |        |        |        |        |        |        |        |        |        |        |        |        |        |        |  |
| 0     | 0,7689 | 0,0316 | 0,9831 | 0,0137 | 0,8139 | 0,0372 | 0,7251 | 0,0476 | 0,4371 | 0,0459 | 0,3971 | 0,0561 | 0,5967 | 0,0579 | 0,9118 | 0,0522 | 0,1375 | 0,0473 |  |
| 1     | 0,1809 | 0,0208 | 0,0166 | 0,0131 | 0,1524 | 0,0256 | 0,2059 | 0,0278 | 0,3075 | 0,0221 | 0,3125 | 0,0221 | 0,2647 | 0,0272 | 0,08   | 0,0428 | 0,264  | 0,0325 |  |
| 2     | 0,0502 | 0,0134 | 0,0003 | 0,0005 | 0,0337 | 0,0129 | 0,069  | 0,0226 | 0,2554 | 0,0388 | 0,2904 | 0,0505 | 0,1386 | 0,0368 | 0,0083 | 0,0094 | 0,5986 | 0,0749 |  |
| Mean  | 0,2814 | 0,0438 | 0,0172 | 0,0142 | 0,2197 | 0,0495 | 0,344  | 0,0692 | 0,8183 | 0,082  | 0,8933 | 0,1044 | 0,5418 | 0,0932 | 0,0965 | 0,0615 | 1,4611 | 0,1211 |  |

**Loadings – psychology domain, single-item strategy, 9-domain profiles**

The quantities reported under Clusters are simply correlations, representing the square root of the corresponding 'R2' or communality of the associated indicator.

Correlations: These are standardised values for the loadings reported in the Loadings output. They represent correlations between the indicators and factors.

| Loadings 9-DP | Clusters | R <sup>2</sup> |
|---------------|----------|----------------|
| okon0         | 0,3499   | 0,1224         |
| okom0         | 0,2425   | 0,0588         |
| oens0         | 0,4831   | 0,2334         |
| obeh0         | 0,6715   | 0,451          |
| start50       | 0,2676   | 0,0716         |

|         |        |        |
|---------|--------|--------|
| start60 | 0,5332 | 0,2843 |
| start70 | 0,3456 | 0,1195 |
| start80 | 0,433  | 0,1875 |
| rm150   | 0,5798 | 0,3362 |
| rm170   | 0,4674 | 0,2185 |
| rm210   | 0,2758 | 0,0761 |
| rm230   | 0,3281 | 0,1076 |
| fabq30  | 0,2783 | 0,0775 |
| fabq40  | 0,2618 | 0,0686 |
| fabq110 | 0,5056 | 0,2557 |
| fabq120 | 0,5823 | 0,339  |
| fabq140 | 0,5258 | 0,2765 |
| mdi1    | 0,7079 | 0,5012 |
| mdi2    | 0,6859 | 0,4704 |
| mdi3    | 0,7129 | 0,5083 |
| mdi4    | 0,6717 | 0,4512 |
| mdi5    | 0,6091 | 0,3711 |
| mdi7    | 0,5837 | 0,3407 |
| mdi8    | 0,6639 | 0,4408 |
| mdi9    | 0,5587 | 0,3121 |
| mdi10   | 0,5145 | 0,2647 |

## Psychology domain, single-item strategy, 7-domain profiles

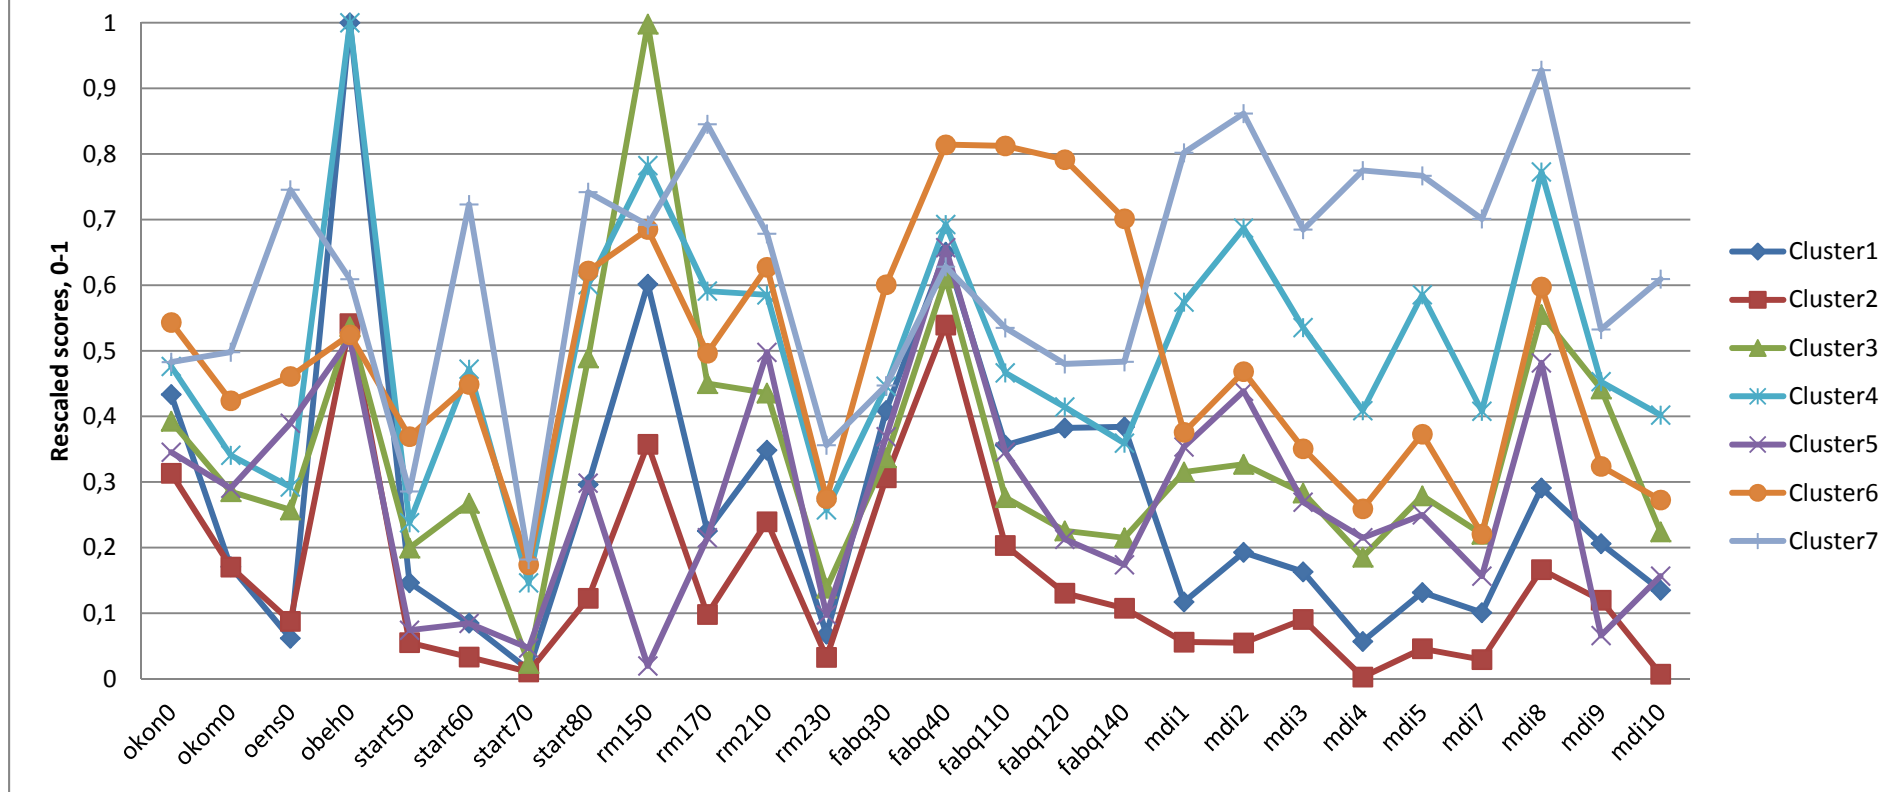

The following variables have been reversed in the 'plots in colours':

okon0: On an average day, what are your possibilities of handling or controlling your pain? (0=complete control, 10=no possibility)

obeh0: How well do you agree: Treatment is crucial to reduce my pain? (0=fully disagree, 10=fully agree)

### Psychology domain, single-item strategy, 8-domain profiles

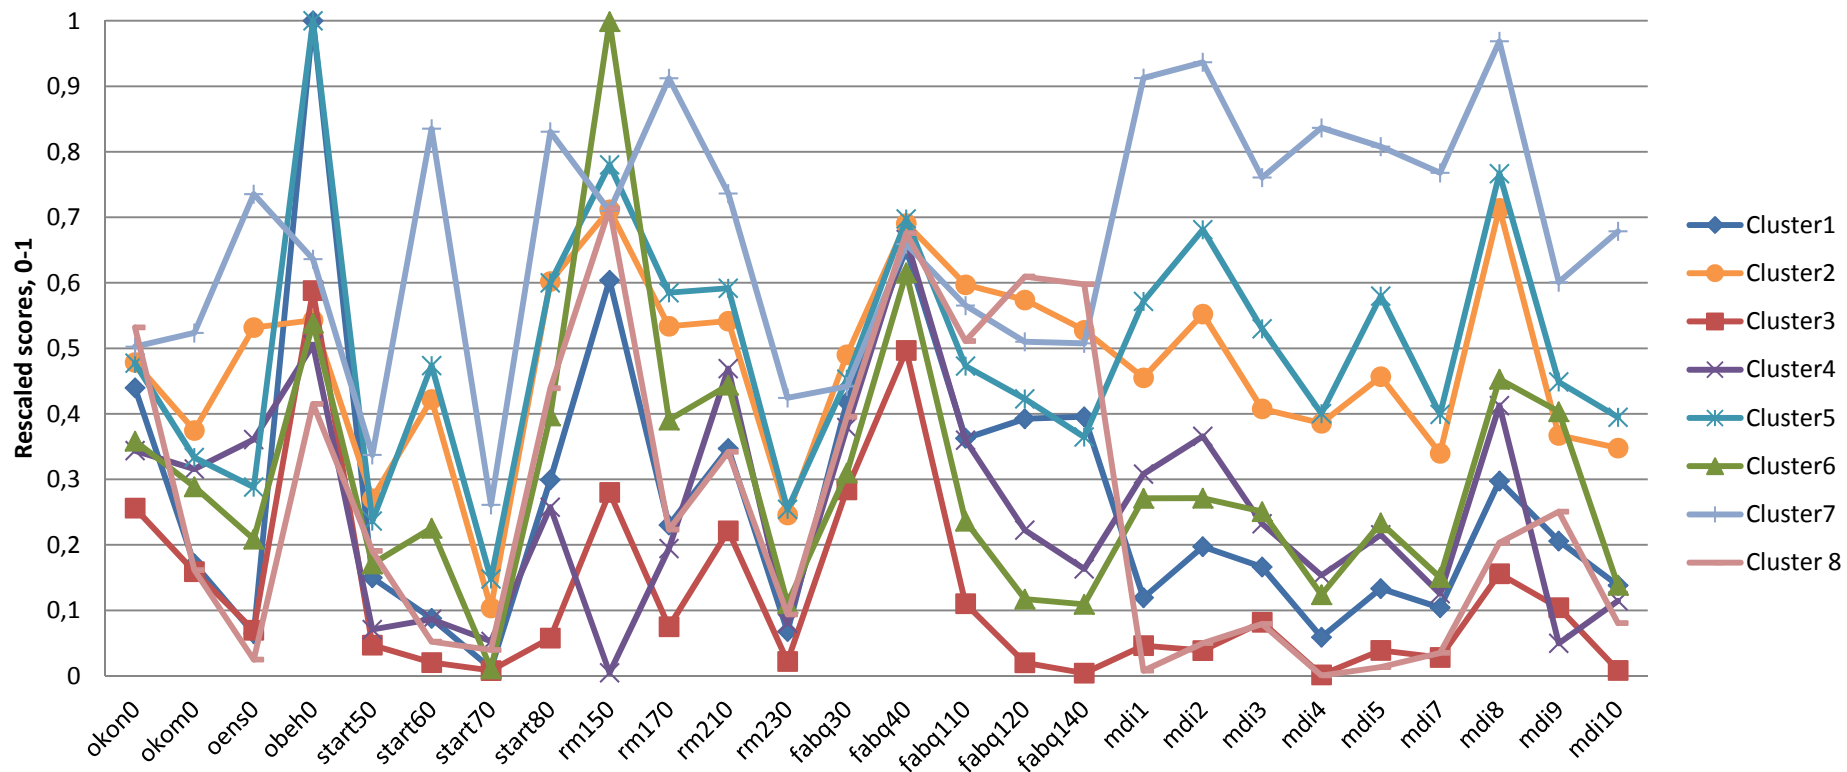



## Psychology domain, single-item strategy, 9-domain profiles

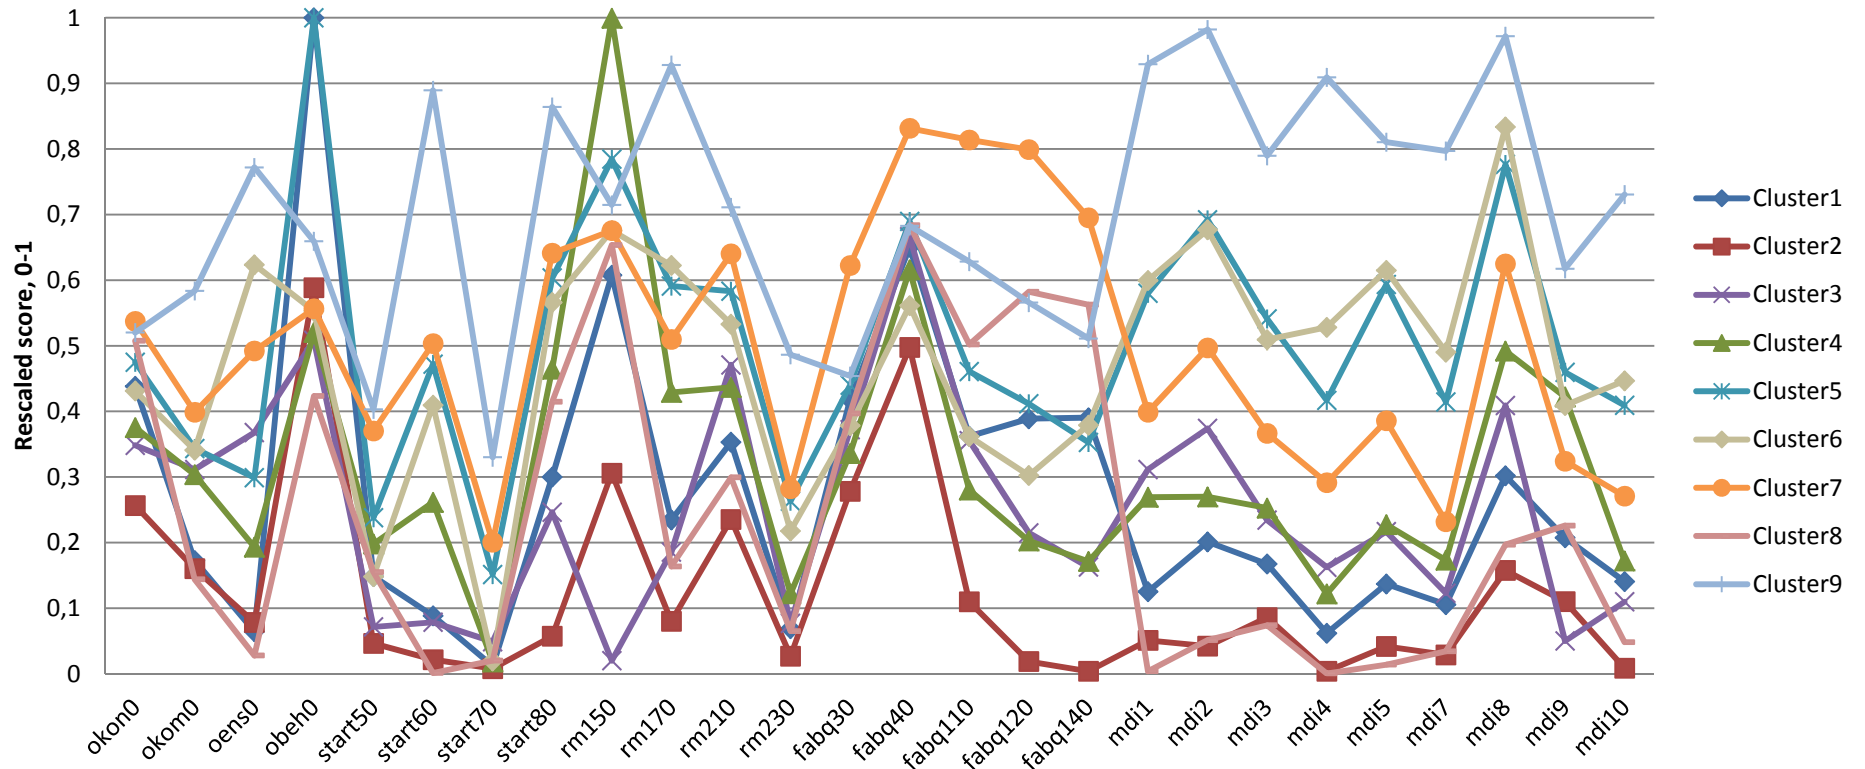

## Pain domain v.2 – single-item strategy

**Profile-plots:** Results (models) with 2 to 9 domain profiles based on the following variables:

|                |                                                                                                                                           |
|----------------|-------------------------------------------------------------------------------------------------------------------------------------------|
| Dlva0          | For how long has this episode of LBP lasted? (0-2 weeks, 2-4 weeks, 1-3 months, >3 months)                                                |
| Vas10          | Numeric pain rating scale, back pain, 0-10 (10=worst imaginable pain)                                                                     |
| Vasb0          | Numeric pain rating scale, leg pain (0=no pain, 1 = mild pain, 2 = moderate-severe pain)                                                  |
| Tlep0          | How many episodes of LBP have you had before this one? (0, 1-3, >3)                                                                       |
| Tlda0          | How many days have you had LBP within the last year? (30 days or less, >30 days)                                                          |
| Start10        | My back pain has spread down my leg(s) at some time in the last 2 weeks (0=no, 1=yes)                                                     |
| Start20        | I have had pain in the shoulder or neck at some time in the last 2 weeks (0=no, 1=yes)                                                    |
| Start90        | Overall, how bothersome has your back pain been in the last 2 weeks? (0=no-moderately bothersome pain, 1= very-extremely bothersome pain) |
| Rm110          | My back or leg is painful almost all the time (0=no, 1=yes)                                                                               |
| Fabq10         | My pain was caused by physical activity (0=disagree, 3 = don't know, 6=agree)                                                             |
| Fabq20         | Physical activity makes my pain worse (0=disagree, 3 = don't know, 6=agree)                                                               |
| Pain_dis       | Pain distribution (0=back pain only, 1=back pain and pain in one leg, 2=back pain and pain in two legs, 3= leg pain only)                 |
| Domin_bp       | Dominating back pain (0=no, 1=yes)                                                                                                        |
| Paraspin_debut | Paraspinal pain onset (0=no, 1=yes)                                                                                                       |

Pain domain: In this version 2, the variable 'leg pain intensity' was used in its Ordinal format, whereas in version 1 (results not shown) it was used in its Continuous format

Pain domain v.2, single-item strategy, 2-domain profiles

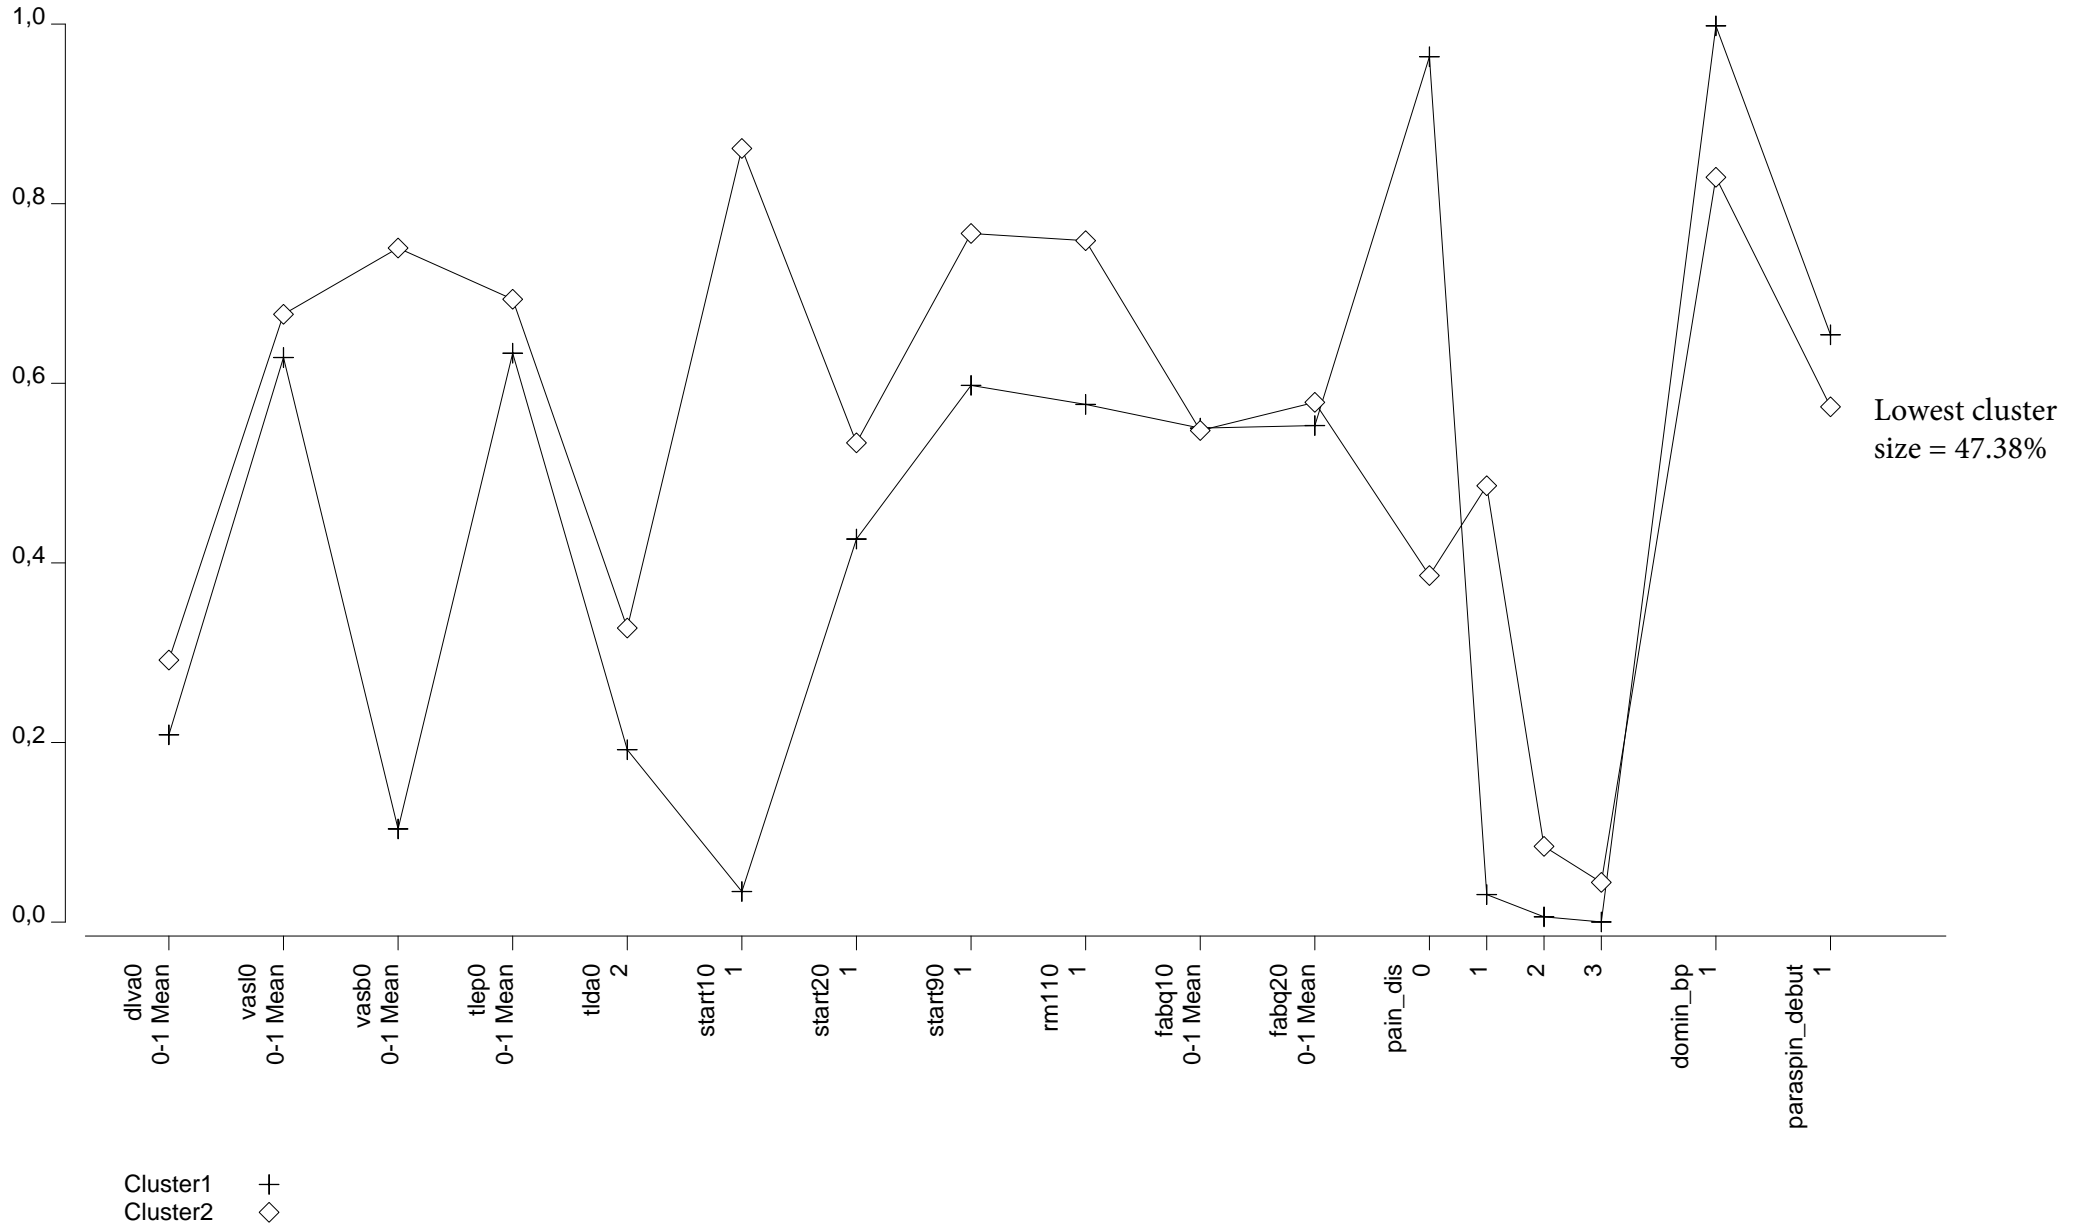

Pain domain v. 2, single-item strategy, 3-domain profiles

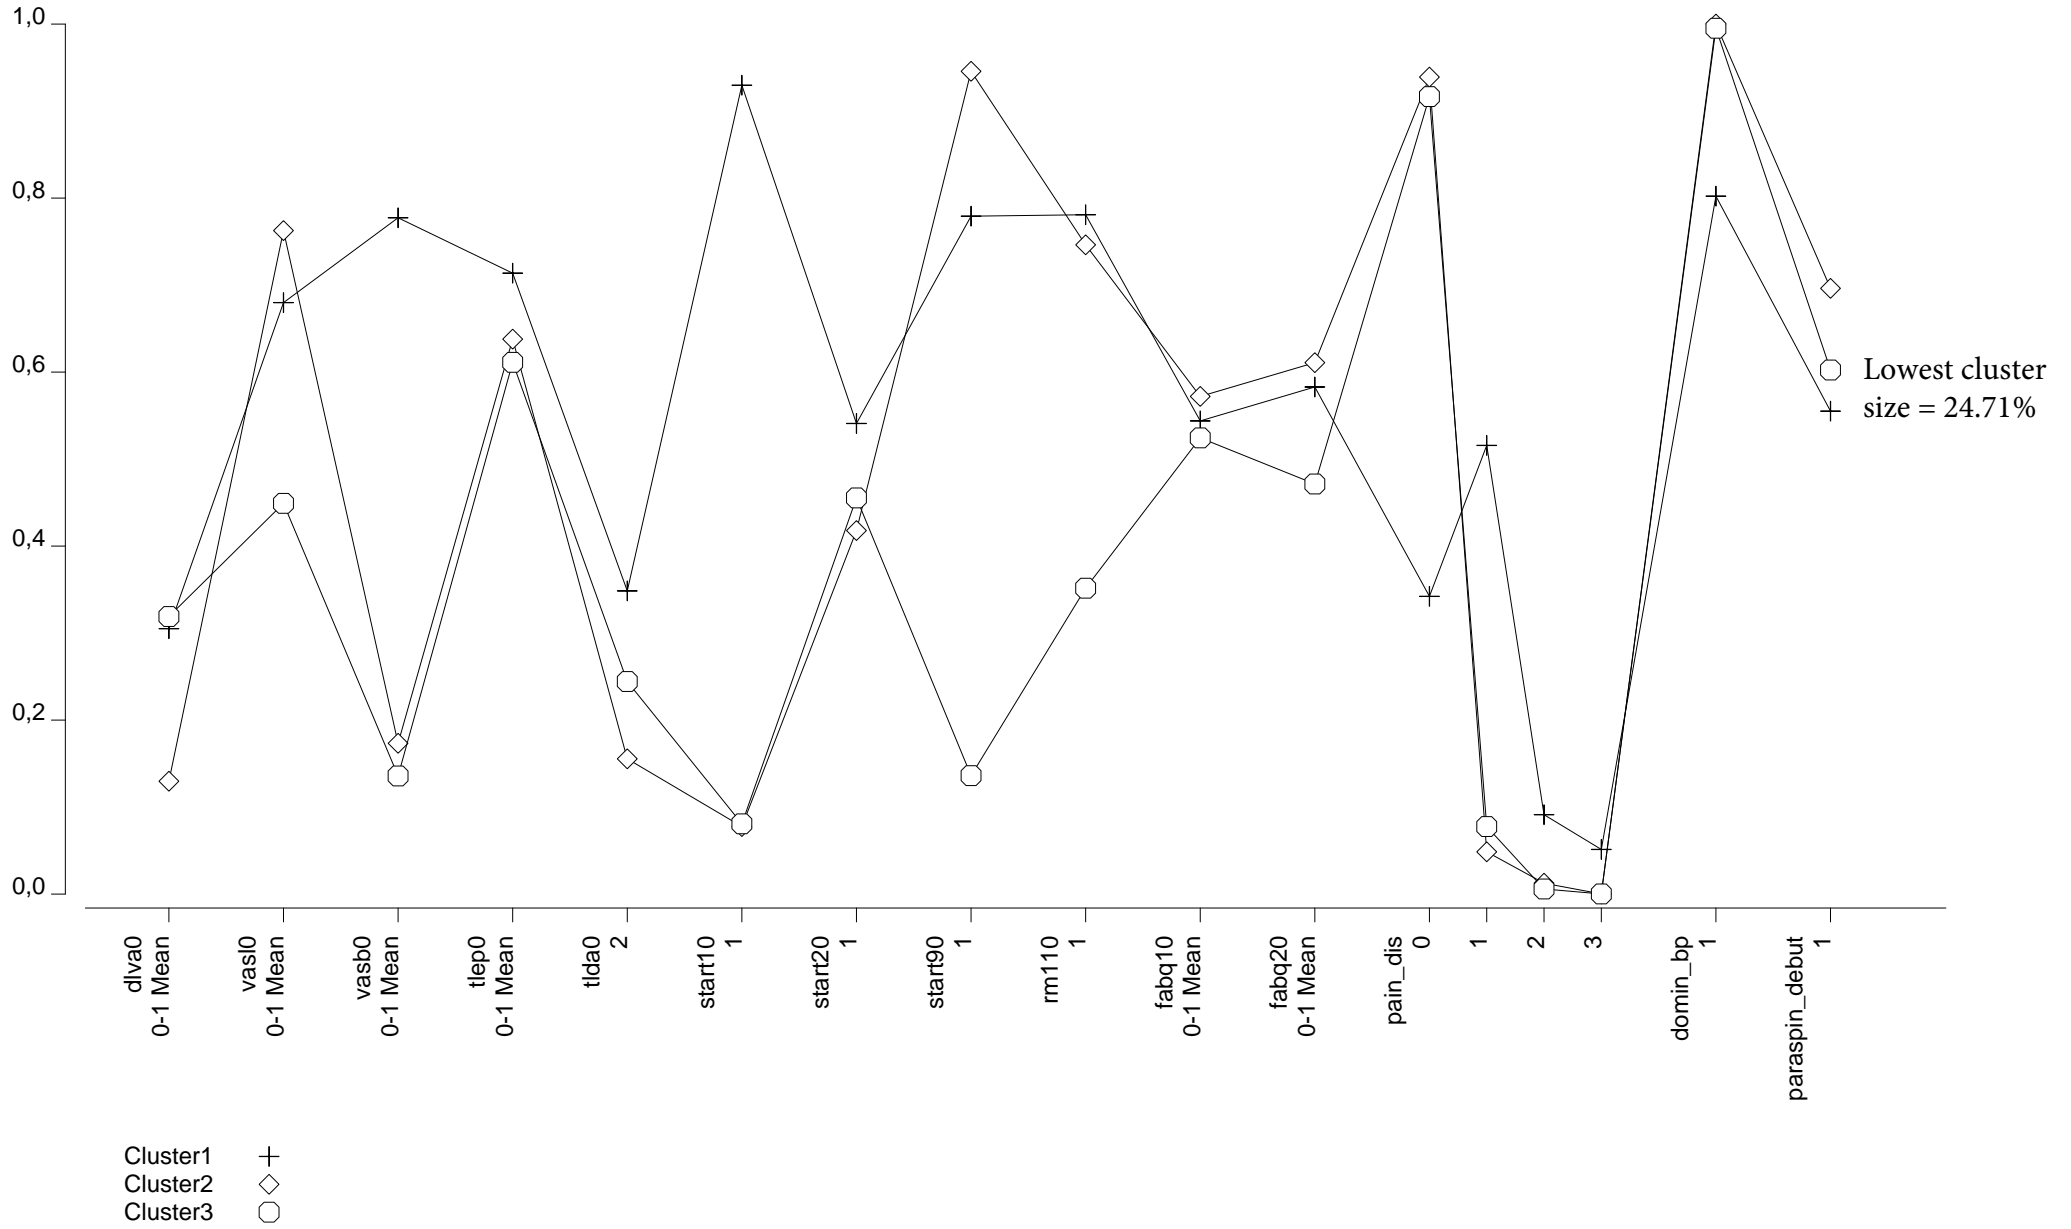

Pain domain v.2, single-item strategy, 4-domain profiles

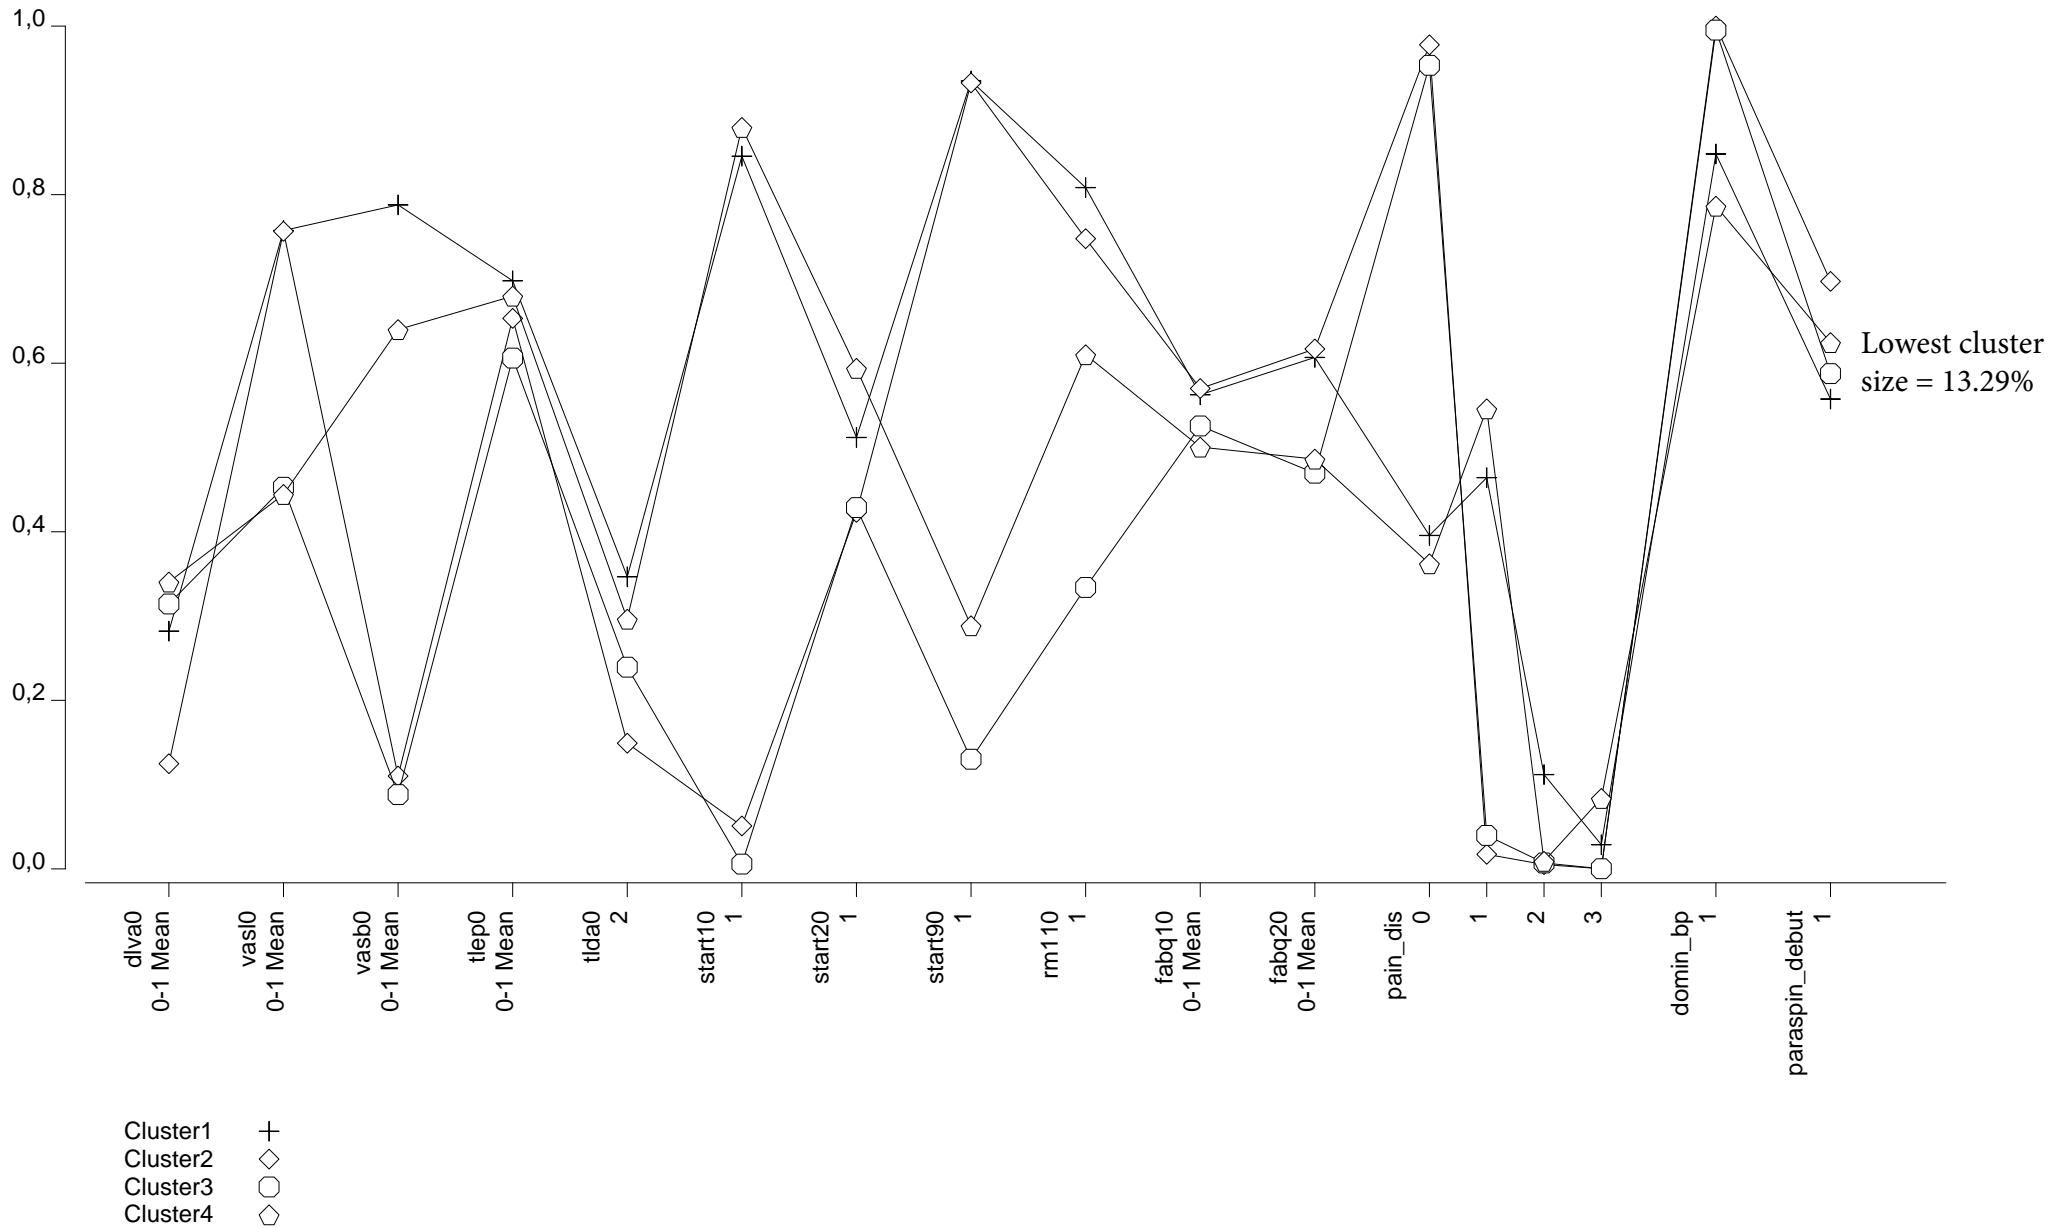

Pain domain v.2, single-item strategy, 5-domain profiles

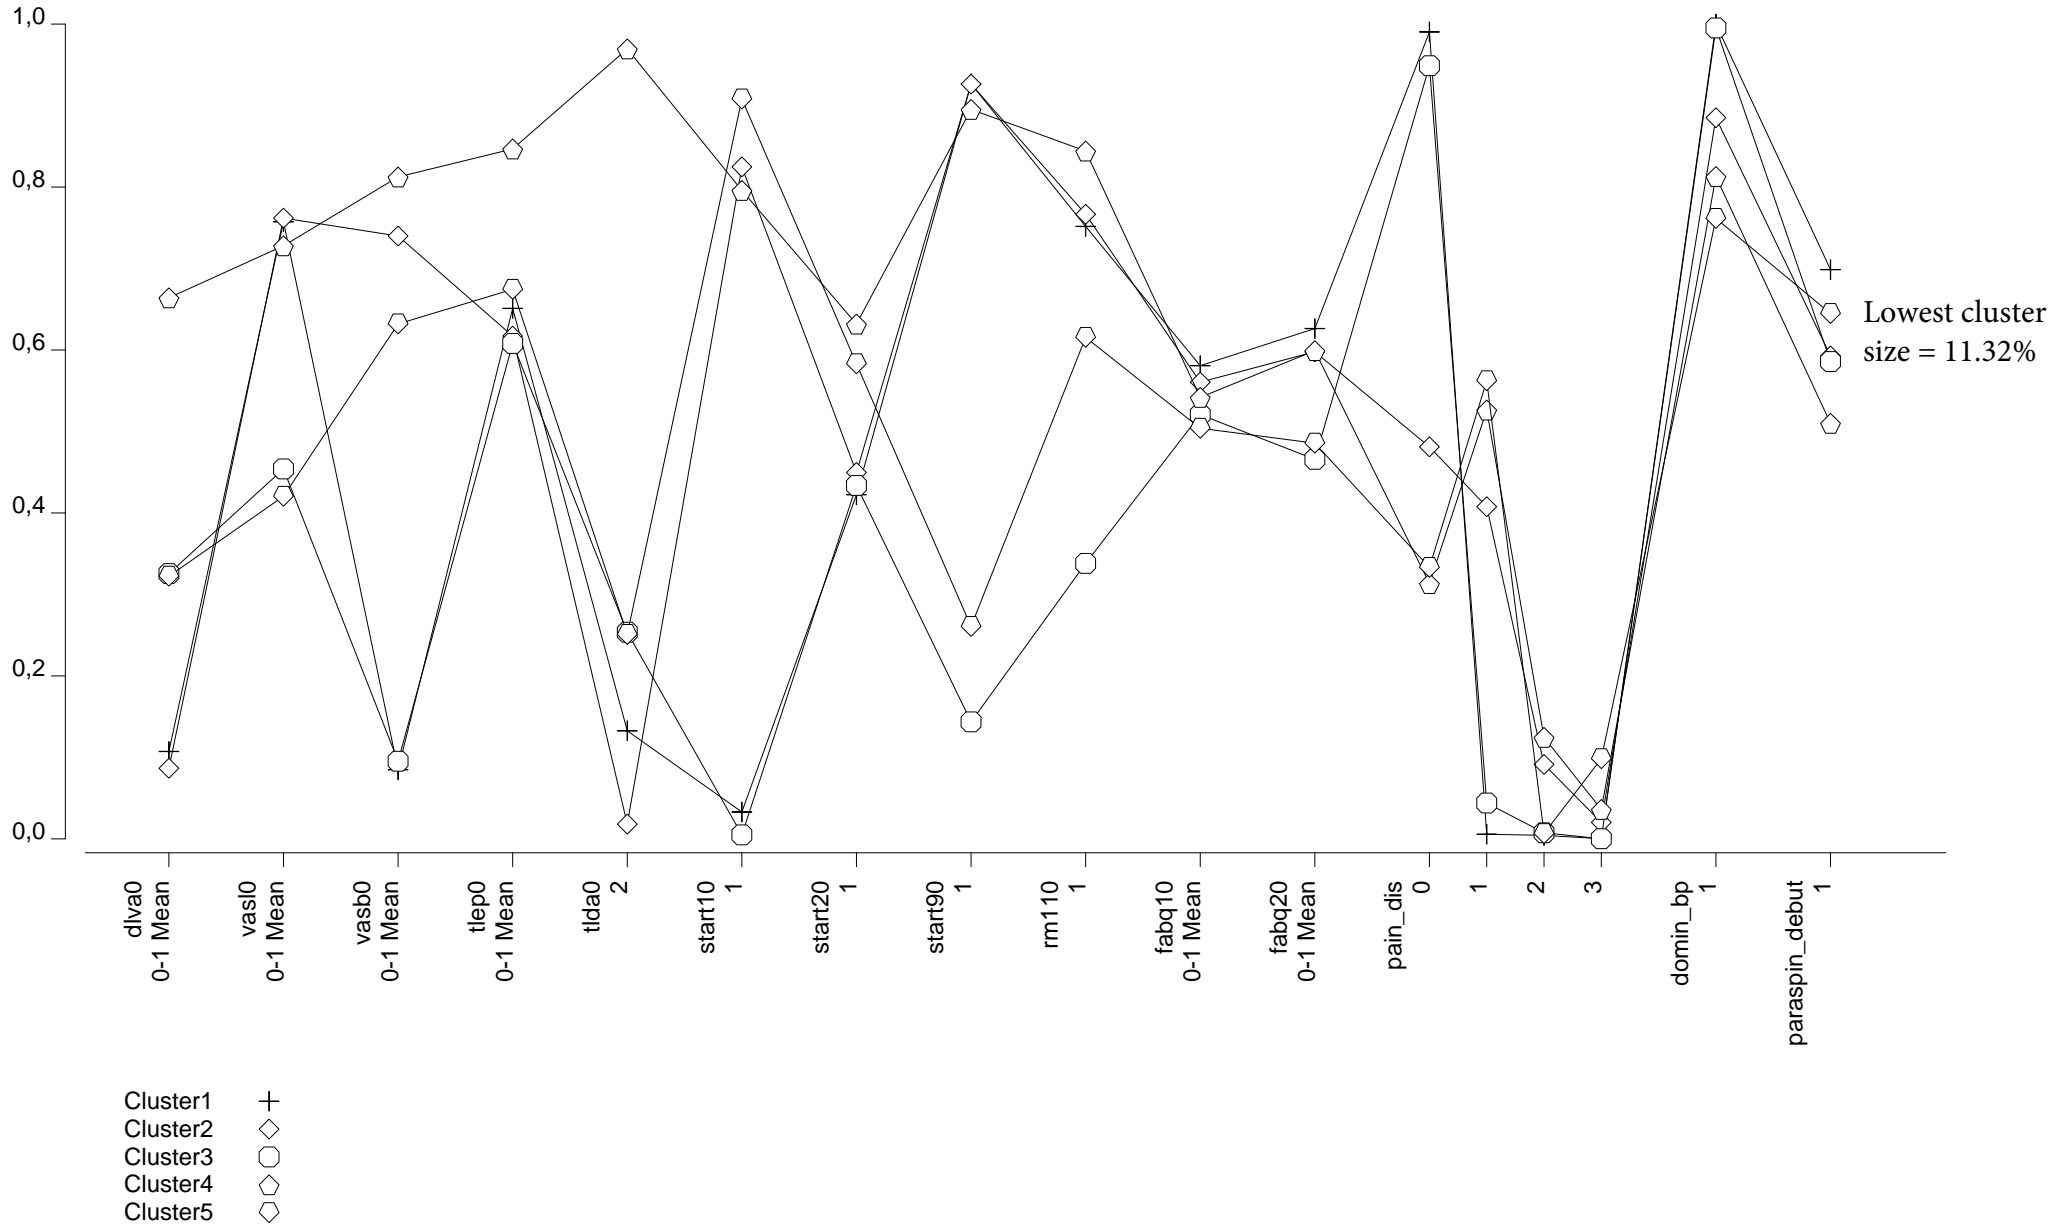

Pain domain v. 2, single-item strategy, 6-domain profiles

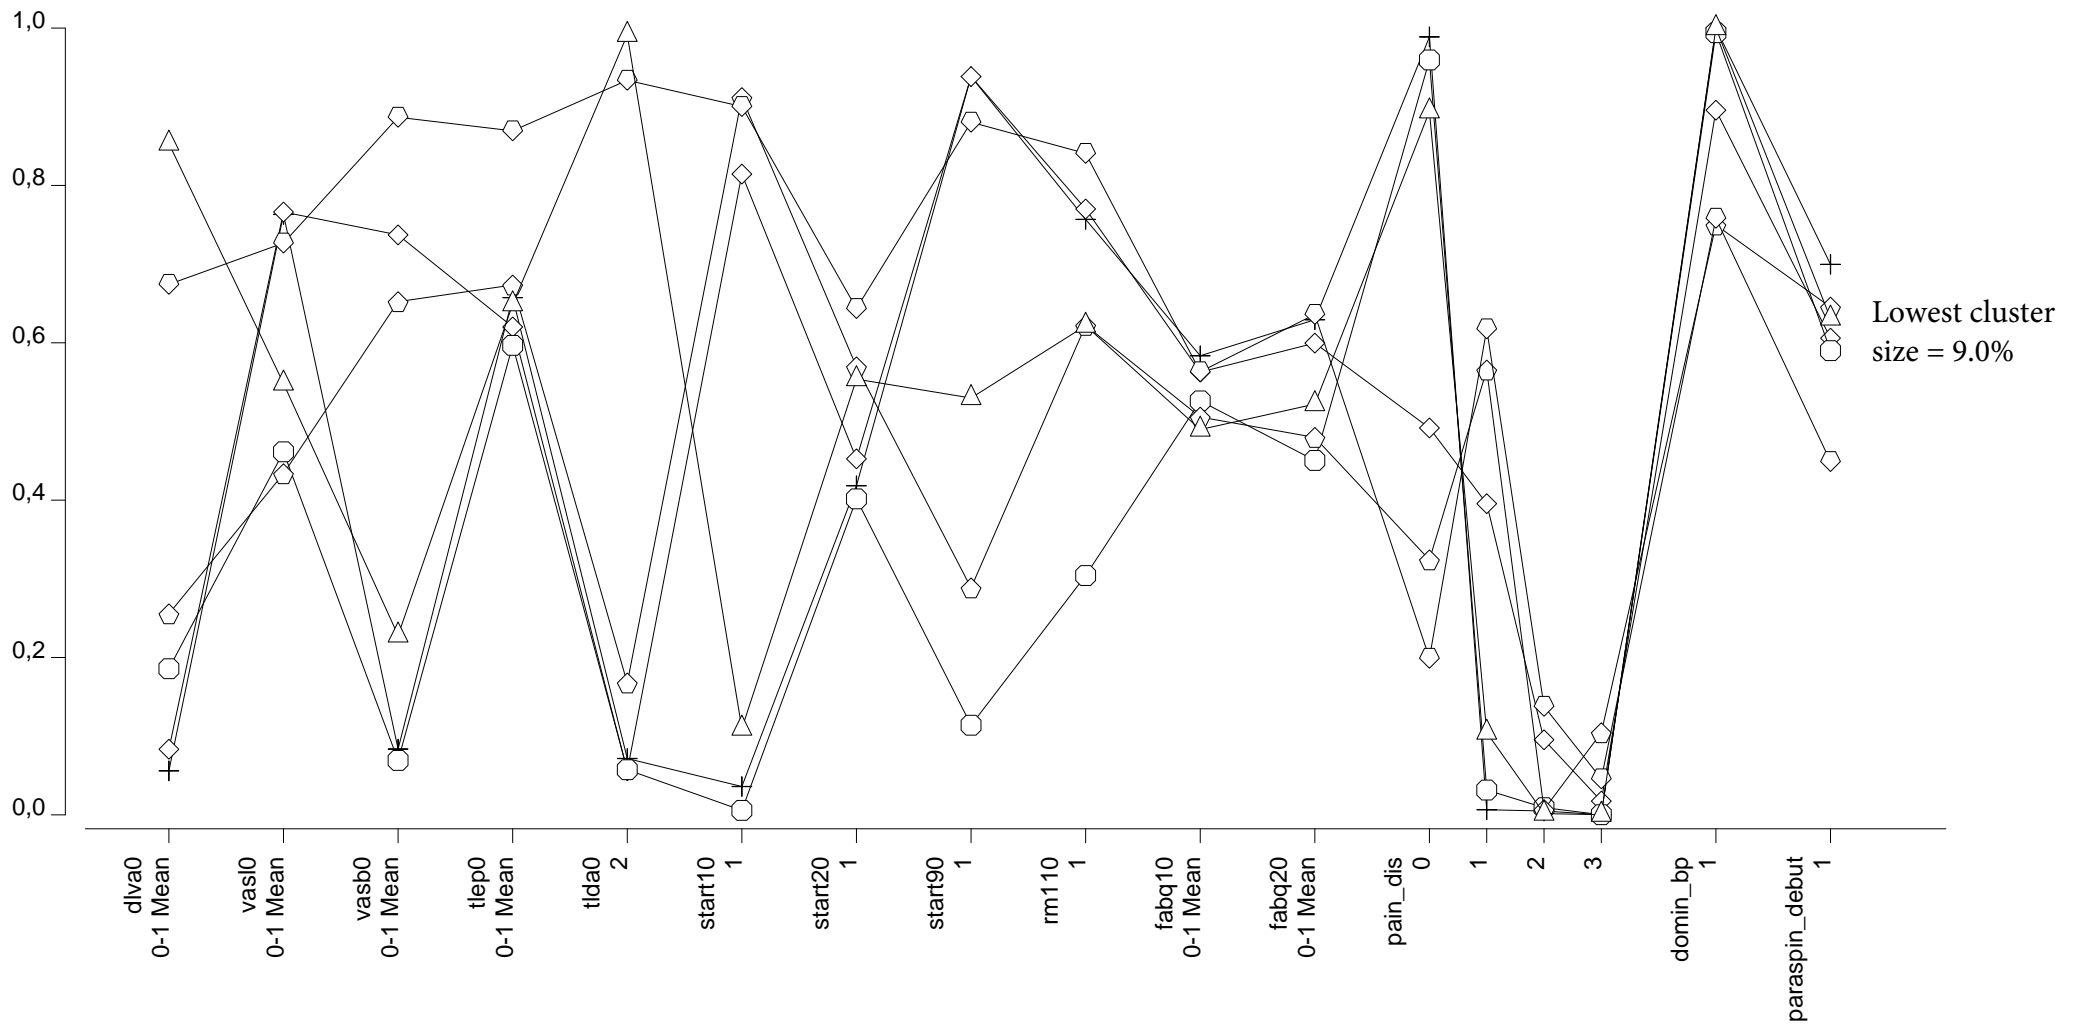

- Cluster1 +
  - Cluster2 ◇
  - Cluster3 ○
  - Cluster4 ◇
  - Cluster5 ◇
  - Cluster6 △
- Cluster 1: Very short duration but high intensity BP  
 Cluster 2: Very short duration but high intensity BP and leg pain  
 Cluster 3: Short duration and low-moderate intensity BP  
 Cluster 4: Short duration and low-moderate intensity BP and high intensity leg pain  
 Cluster 5: Long duration and recurrent, high intensity BP and leg pain  
 Cluster 6: Very long duration and moderate intensity BP

Pain domain v. 2, single-item strategy, 7-domain profiles

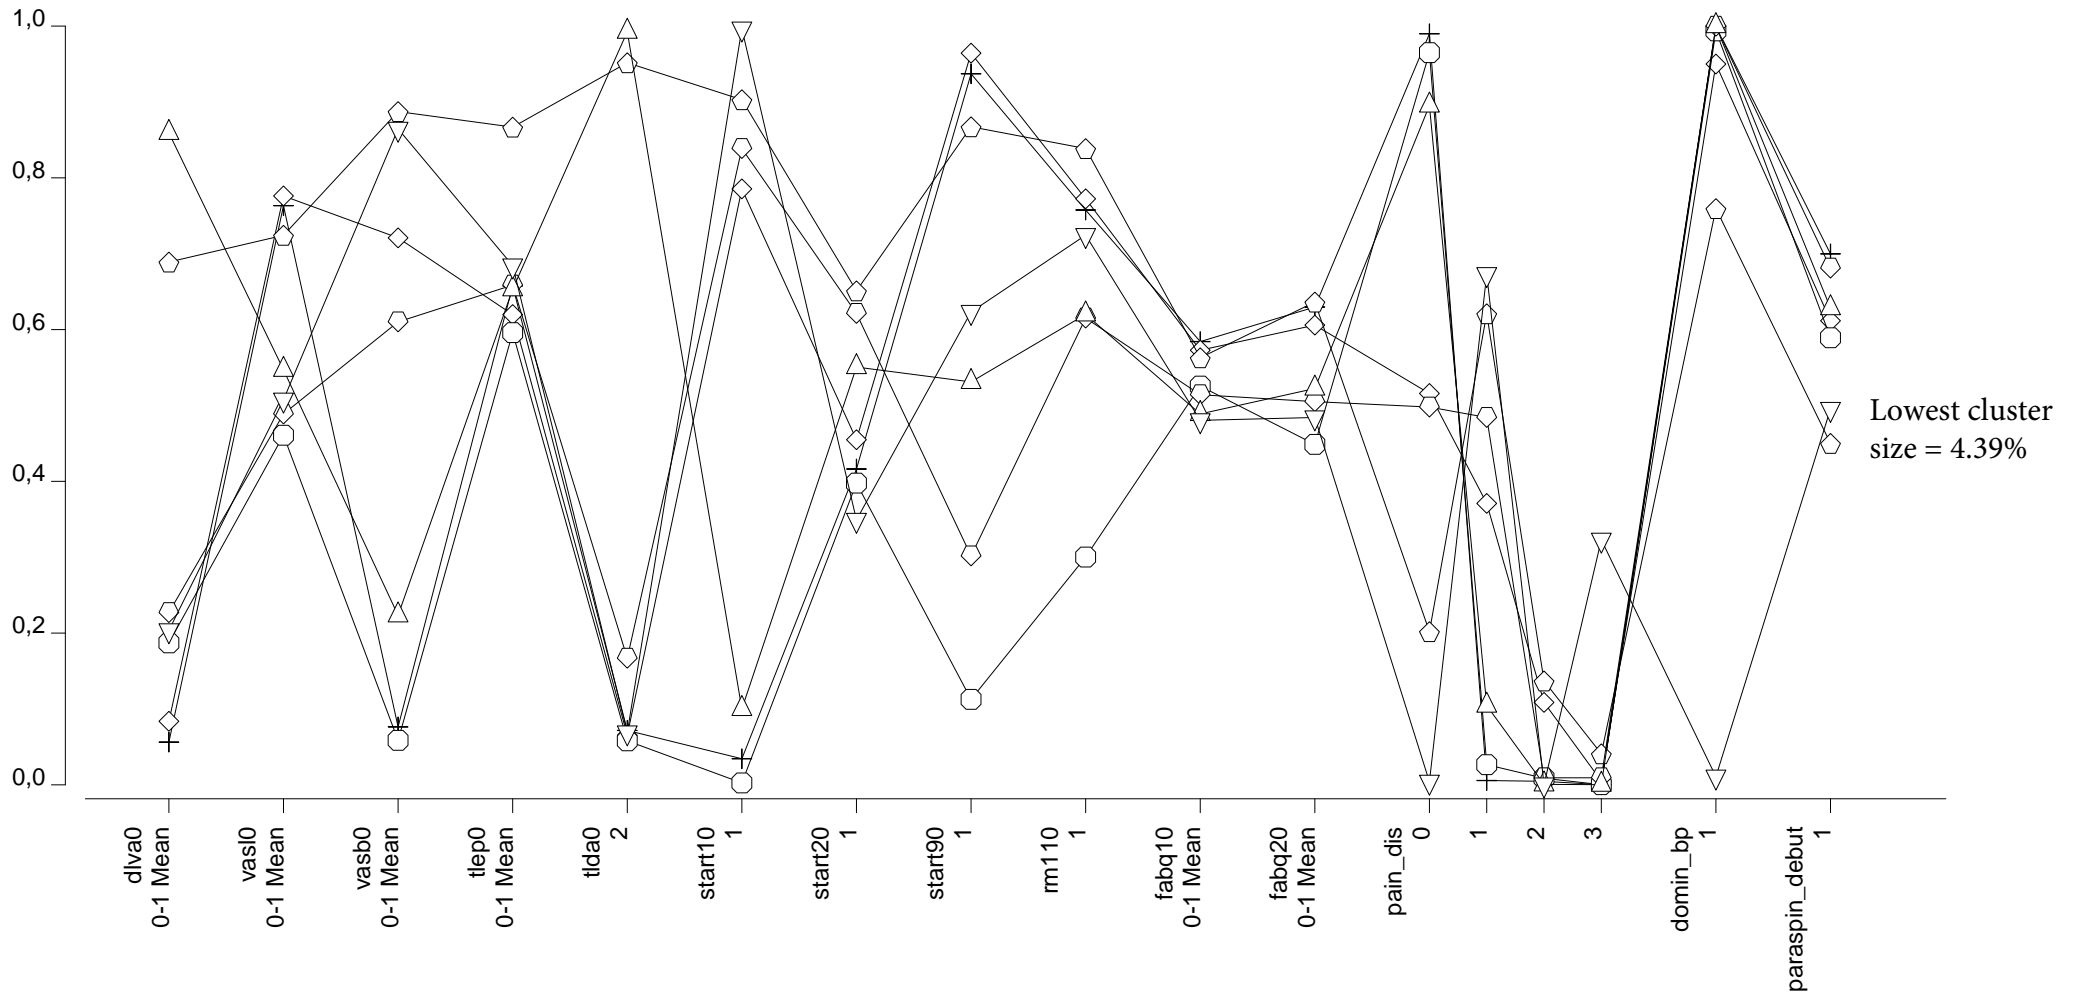

- Cluster1 + Same BIC appeared 5 out of 10 times at the most
- Cluster2 ◇
- Cluster3 ○
- Cluster4 ◇
- Cluster5 ◇
- Cluster6 △
- Cluster7 ▽



Pain domain v.2, single-item strategy, 8-domain profiles

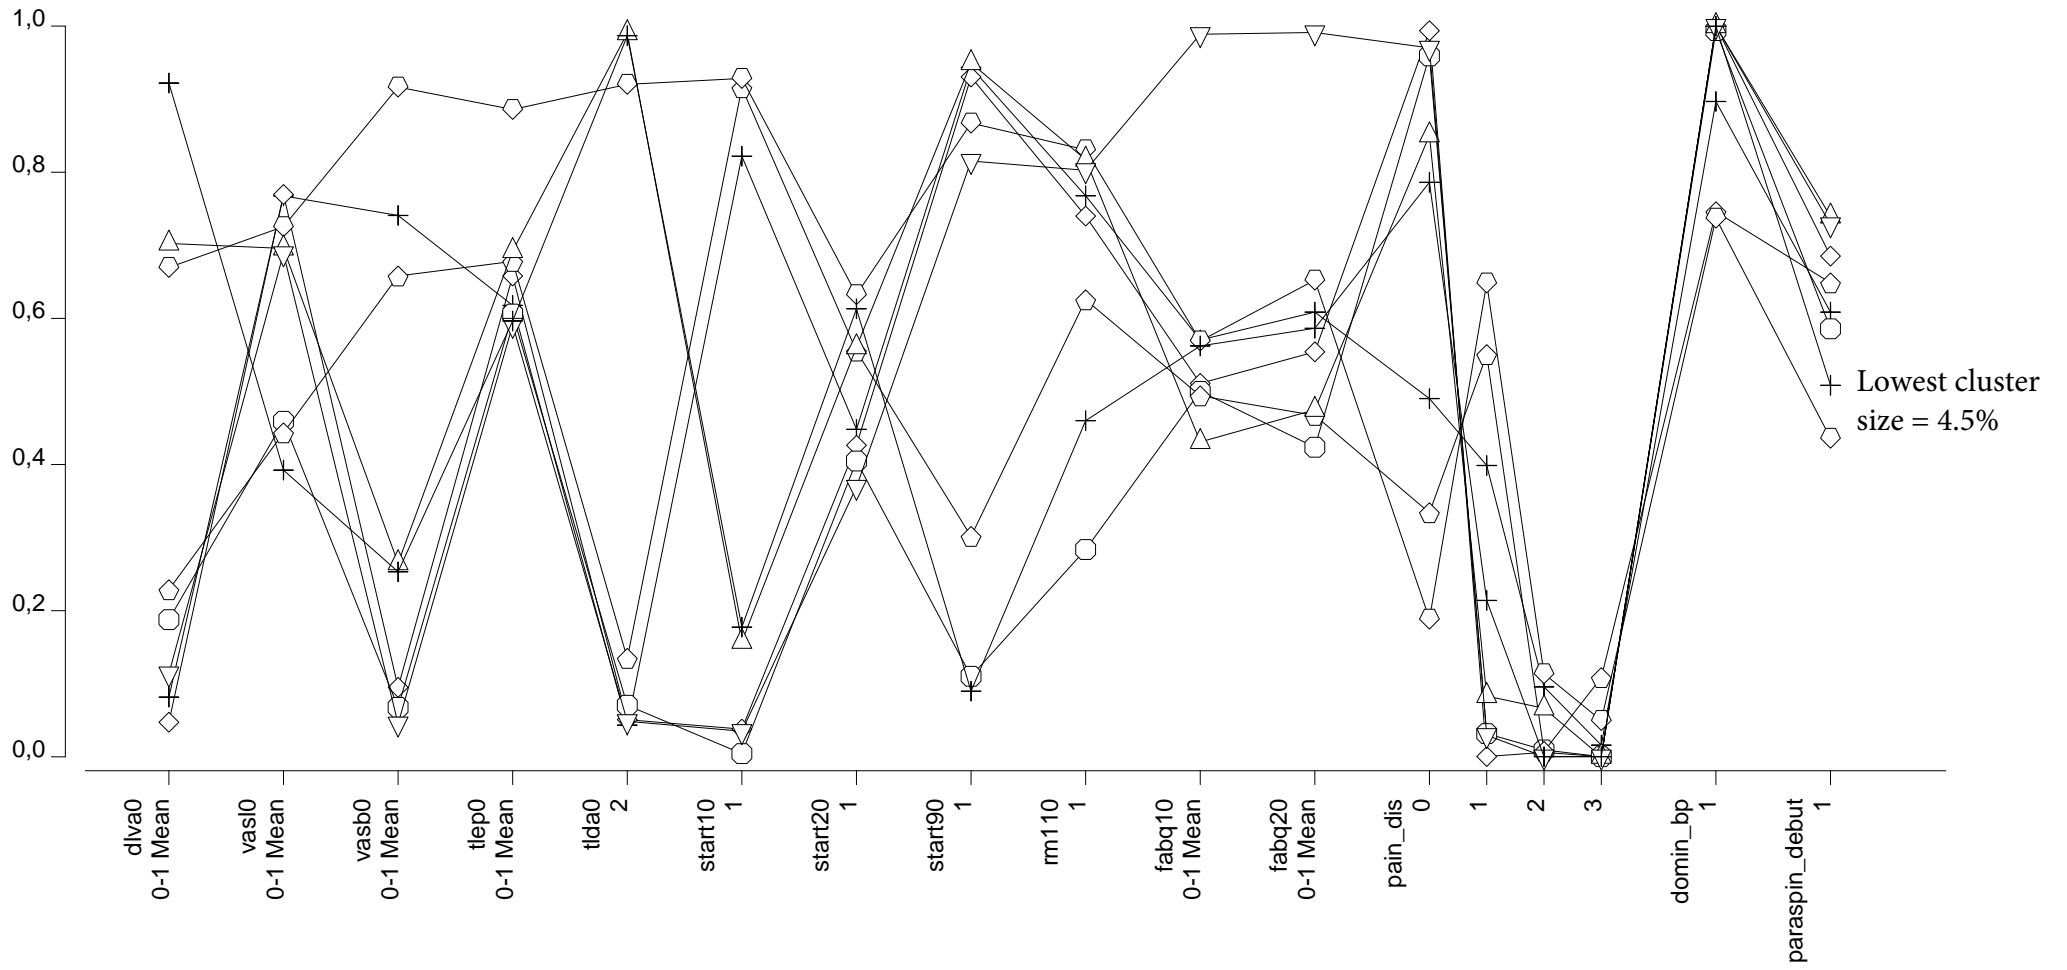

- Cluster1 +
  - Cluster2 ◇
  - Cluster3 ○
  - Cluster4 ◇
  - Cluster5 ◇
  - Cluster6 △
  - Cluster7 ▽
  - Cluster8 +
- Same BIC appeared 3 out of 10 times at the most

Pain domain v.2, single-item strategy, 9 domain profiles

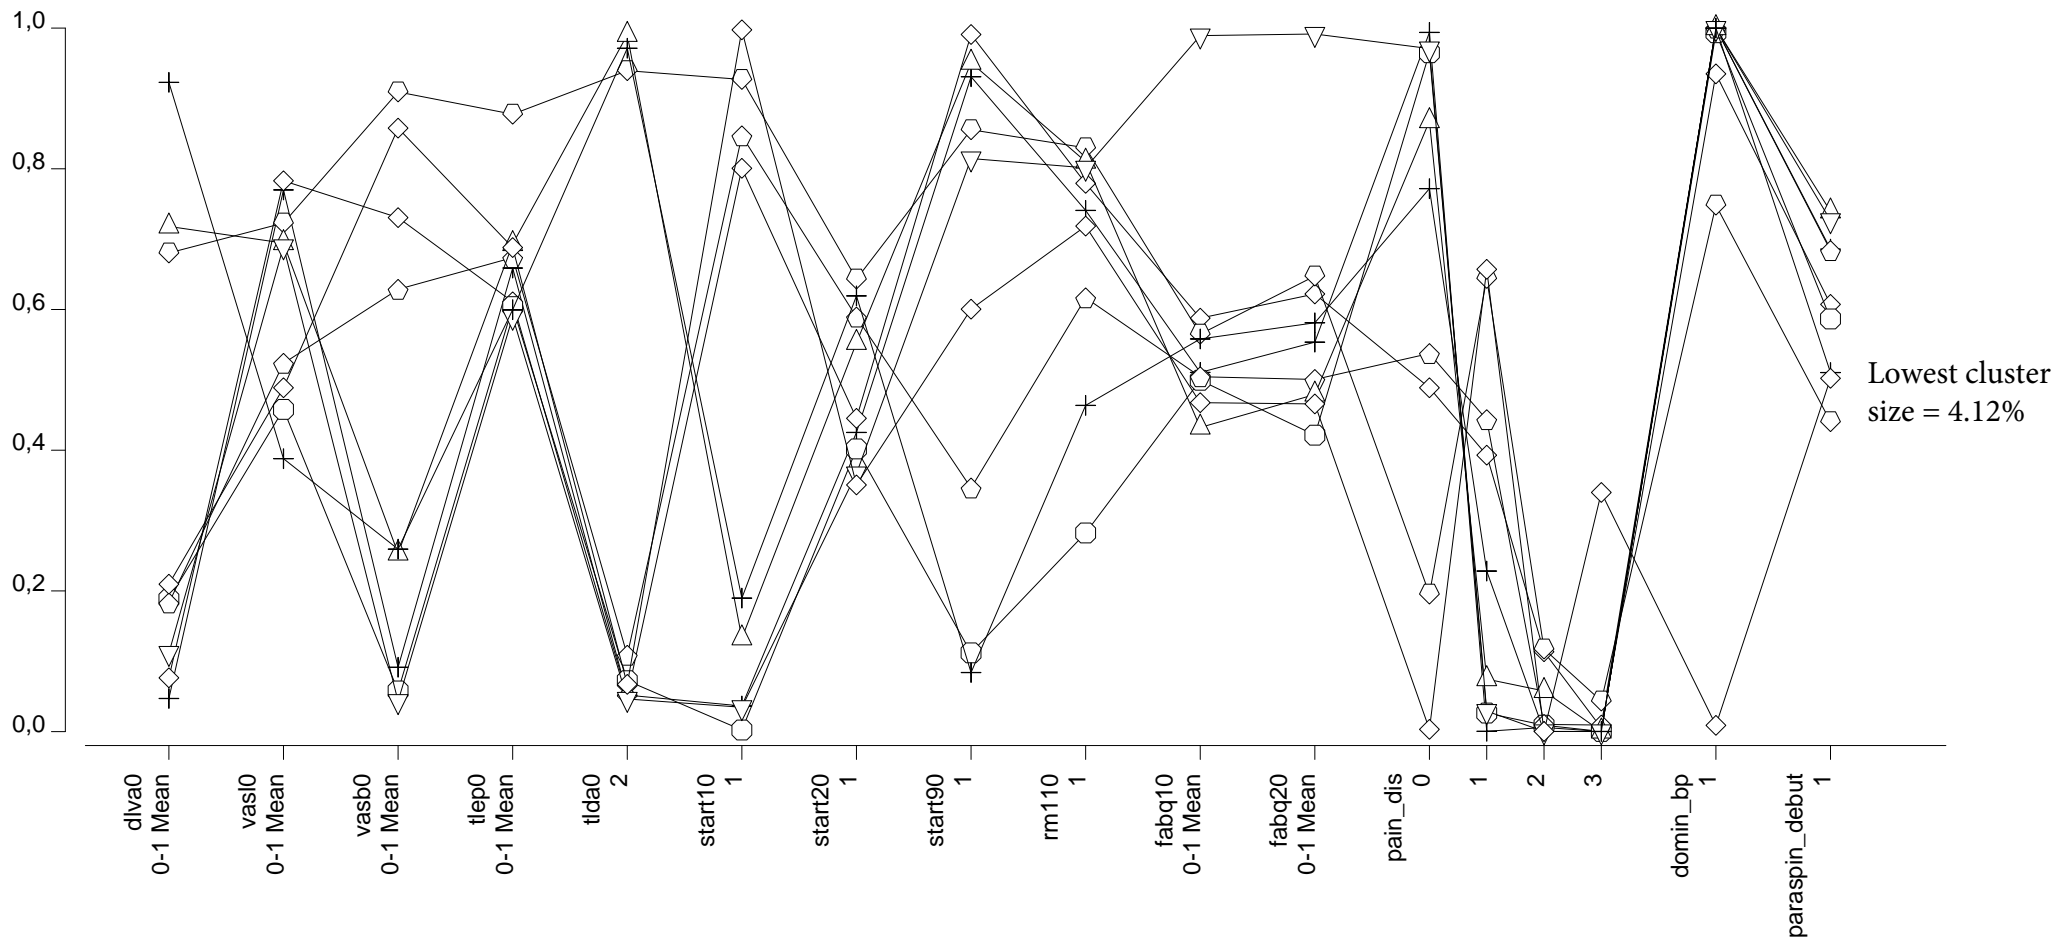

Cluster1 + Same BIC appeared 6 out of 10 times at the most  
 Cluster2 ◇  
 Cluster3 ○  
 Cluster4 ◇  
 Cluster5 ◇  
 Cluster6 △  
 Cluster7 ▽  
 Cluster8 +  
 Cluster9 ◇

**Profile in numbers**

The first row of numbers shows how large each cluster is. The body of the table contains (marginal) conditional probabilities that show how the clusters are related to the Nominal or Ordinal indicator variables. These probabilities sum to 1 within each cluster (column). For indicators specified as Continuous, the body of the table contains means instead of probabilities. For indicators specified as Ordinal, means are displayed in addition to the conditional probabilities

| <b>Pain v.2,<br/>single-item,<br/>6-DP</b> | Cluster1 | s.e.   | Cluster2 | s.e.   | Cluster3 | s.e.   | Cluster4 | s.e.   | Cluster5 | s.e.   | Cluster6 | s.e.   |
|--------------------------------------------|----------|--------|----------|--------|----------|--------|----------|--------|----------|--------|----------|--------|
| Cluster Size                               | 26,22%   | 0,0195 | 24,96%   | 0,0215 | 17,61%   | 0,0174 | 11,11%   | 0,0172 | 11,11%   | 0,0142 | 9,00%    | 0,0112 |
| <b>Indicators</b>                          |          |        |          |        |          |        |          |        |          |        |          |        |
| dlva0                                      |          |        |          |        |          |        |          |        |          |        |          |        |
| 1                                          | 0,8674   | 0,0235 | 0,8154   | 0,0313 | 0,6538   | 0,0393 | 0,5599   | 0,0578 | 0,1412   | 0,041  | 0,0319   | 0,0194 |
| 2                                          | 0,1026   | 0,0149 | 0,1303   | 0,0169 | 0,186    | 0,0184 | 0,2017   | 0,0193 | 0,1378   | 0,0212 | 0,0591   | 0,021  |
| 3                                          | 0,0251   | 0,008  | 0,0431   | 0,0124 | 0,1095   | 0,0185 | 0,1503   | 0,027  | 0,2785   | 0,0288 | 0,2265   | 0,0307 |
| 4                                          | 0,0048   | 0,0025 | 0,0112   | 0,0055 | 0,0507   | 0,0148 | 0,0881   | 0,0284 | 0,4425   | 0,0571 | 0,6826   | 0,0633 |
| Mean                                       | 1,1674   | 0,0353 | 1,25     | 0,0527 | 1,557    | 0,0805 | 1,7666   | 0,1336 | 3,0223   | 0,1505 | 3,5597   | 0,1198 |
| vasl0                                      |          |        |          |        |          |        |          |        |          |        |          |        |
| Mean                                       | 7,6305   | 0,1187 | 7,6606   | 0,1124 | 4,6135   | 0,1969 | 4,3343   | 0,3083 | 7,2668   | 0,1359 | 5,4813   | 0,2356 |
| vasb0                                      |          |        |          |        |          |        |          |        |          |        |          |        |
| 0                                          | 0,8334   | 0,0319 | 0,0089   | 0,0063 | 0,8621   | 0,035  | 0,0217   | 0,0153 | 0,0011   | 0,001  | 0,5498   | 0,0632 |
| 1                                          | 0,166    | 0,0316 | 0,508    | 0,0376 | 0,1375   | 0,0348 | 0,6523   | 0,0544 | 0,2247   | 0,0532 | 0,4442   | 0,0611 |
| 2                                          | 0,0006   | 0,0004 | 0,4831   | 0,0391 | 0,0004   | 0,0003 | 0,3259   | 0,0584 | 0,7742   | 0,0538 | 0,006    | 0,0046 |
| Mean                                       | 0,1671   | 0,0321 | 1,4742   | 0,0415 | 0,1383   | 0,0353 | 1,3042   | 0,0657 | 1,7732   | 0,0544 | 0,4561   | 0,0655 |
| tlep0                                      |          |        |          |        |          |        |          |        |          |        |          |        |
| 1                                          | 0,1627   | 0,0218 | 0,1932   | 0,025  | 0,2133   | 0,0297 | 0,1502   | 0,0342 | 0,031    | 0,0136 | 0,1693   | 0,0375 |
| 2                                          | 0,3599   | 0,0188 | 0,3736   | 0,0189 | 0,3803   | 0,0189 | 0,3529   | 0,0251 | 0,1995   | 0,0361 | 0,3633   | 0,0241 |
| 3                                          | 0,4774   | 0,032  | 0,4332   | 0,0339 | 0,4064   | 0,0378 | 0,4969   | 0,0541 | 0,7695   | 0,049  | 0,4673   | 0,0555 |
| Mean                                       | 2,3147   | 0,0514 | 2,2401   | 0,0565 | 2,1931   | 0,0653 | 2,3467   | 0,087  | 2,7385   | 0,0622 | 2,298    | 0,0916 |
| tlda0                                      |          |        |          |        |          |        |          |        |          |        |          |        |
| 1                                          | 0,9284   | 0,0199 | 0,9441   | 0,0285 | 0,9426   | 0,027  | 0,8324   | 0,0529 | 0,0665   | 0,0499 | 0,0087   | 0,0231 |
| 2                                          | 0,0716   | 0,0199 | 0,0559   | 0,0285 | 0,0574   | 0,027  | 0,1676   | 0,0529 | 0,9335   | 0,0499 | 0,9913   | 0,0231 |
| start10                                    |          |        |          |        |          |        |          |        |          |        |          |        |
| 0                                          | 0,964    | 0,0152 | 0,1857   | 0,0328 | 0,9944   | 0,0101 | 0,0883   | 0,0403 | 0,0998   | 0,0372 | 0,8905   | 0,0445 |
| 1                                          | 0,036    | 0,0152 | 0,8143   | 0,0328 | 0,0056   | 0,0101 | 0,9117   | 0,0403 | 0,9002   | 0,0372 | 0,1095   | 0,0445 |

|          |        |        |        |        |        |        |        |        |        |        |        |        |  |
|----------|--------|--------|--------|--------|--------|--------|--------|--------|--------|--------|--------|--------|--|
| start20  |        |        |        |        |        |        |        |        |        |        |        |        |  |
| 0        | 0,5819 | 0,0346 | 0,5475 | 0,0371 | 0,5984 | 0,0423 | 0,4305 | 0,0582 | 0,3566 | 0,0531 | 0,4464 | 0,0602 |  |
| 1        | 0,4181 | 0,0346 | 0,4525 | 0,0371 | 0,4016 | 0,0423 | 0,5695 | 0,0582 | 0,6434 | 0,0531 | 0,5536 | 0,0602 |  |
| start90  |        |        |        |        |        |        |        |        |        |        |        |        |  |
| 0        | 0,0618 | 0,0299 | 0,0618 | 0,0297 | 0,8861 | 0,0412 | 0,7116 | 0,0638 | 0,1198 | 0,0382 | 0,4702 | 0,0636 |  |
| 1        | 0,9382 | 0,0299 | 0,9382 | 0,0297 | 0,1139 | 0,0412 | 0,2884 | 0,0638 | 0,8802 | 0,0382 | 0,5298 | 0,0636 |  |
| rm110    |        |        |        |        |        |        |        |        |        |        |        |        |  |
| 0        | 0,2432 | 0,0322 | 0,23   | 0,0317 | 0,6959 | 0,0434 | 0,378  | 0,0565 | 0,1595 | 0,0398 | 0,3784 | 0,0602 |  |
| 1        | 0,7568 | 0,0322 | 0,77   | 0,0317 | 0,3041 | 0,0434 | 0,622  | 0,0565 | 0,8405 | 0,0398 | 0,6216 | 0,0602 |  |
| fabq10   |        |        |        |        |        |        |        |        |        |        |        |        |  |
| 0        | 0,1373 | 0,019  | 0,1524 | 0,0203 | 0,1807 | 0,0264 | 0,1977 | 0,0341 | 0,152  | 0,0286 | 0,2112 | 0,0374 |  |
| 1        | 0,0662 | 0,0094 | 0,0713 | 0,01   | 0,0803 | 0,0116 | 0,0853 | 0,0134 | 0,0712 | 0,012  | 0,0892 | 0,0141 |  |
| 2        | 0,0432 | 0,0068 | 0,0451 | 0,0071 | 0,0482 | 0,0076 | 0,0497 | 0,008  | 0,045  | 0,0075 | 0,0508 | 0,0081 |  |
| 3        | 0,2715 | 0,0152 | 0,2752 | 0,0151 | 0,279  | 0,0151 | 0,2798 | 0,015  | 0,2751 | 0,0157 | 0,2797 | 0,0151 |  |
| 4        | 0,1114 | 0,0108 | 0,1095 | 0,0107 | 0,1054 | 0,0107 | 0,1027 | 0,0111 | 0,1096 | 0,011  | 0,1004 | 0,0113 |  |
| 5        | 0,1347 | 0,0134 | 0,1284 | 0,0131 | 0,1173 | 0,0136 | 0,111  | 0,0151 | 0,1286 | 0,0154 | 0,1062 | 0,0155 |  |
| 6        | 0,2357 | 0,0235 | 0,2181 | 0,0229 | 0,1891 | 0,0253 | 0,1738 | 0,0297 | 0,2185 | 0,0321 | 0,1625 | 0,0303 |  |
| Mean     | 3,5005 | 0,1454 | 3,3759 | 0,149  | 3,1563 | 0,1847 | 3,0327 | 0,2341 | 3,3785 | 0,2204 | 2,9375 | 0,2498 |  |
| fabq20   |        |        |        |        |        |        |        |        |        |        |        |        |  |
| 0        | 0,0788 | 0,0134 | 0,0946 | 0,0152 | 0,1971 | 0,0269 | 0,1737 | 0,031  | 0,0754 | 0,0181 | 0,143  | 0,0288 |  |
| 1        | 0,0671 | 0,0099 | 0,0767 | 0,0109 | 0,1267 | 0,016  | 0,1168 | 0,0173 | 0,065  | 0,0126 | 0,1026 | 0,0167 |  |
| 2        | 0,0952 | 0,0108 | 0,1035 | 0,0114 | 0,1354 | 0,0134 | 0,1307 | 0,0139 | 0,0933 | 0,013  | 0,1225 | 0,014  |  |
| 3        | 0,1737 | 0,0131 | 0,1797 | 0,0133 | 0,1863 | 0,0134 | 0,1881 | 0,0134 | 0,1721 | 0,0145 | 0,188  | 0,0134 |  |
| 4        | 0,1707 | 0,0131 | 0,168  | 0,013  | 0,138  | 0,013  | 0,1458 | 0,0144 | 0,1711 | 0,0131 | 0,1555 | 0,0142 |  |
| 5        | 0,1734 | 0,0154 | 0,1624 | 0,015  | 0,1057 | 0,0138 | 0,1168 | 0,0169 | 0,1758 | 0,018  | 0,1329 | 0,018  |  |
| 6        | 0,2411 | 0,0235 | 0,2149 | 0,0228 | 0,1108 | 0,0186 | 0,1281 | 0,0249 | 0,2474 | 0,0338 | 0,1556 | 0,0285 |  |
| Mean     | 3,7748 | 0,1367 | 3,5968 | 0,1425 | 2,7017 | 0,1791 | 2,8783 | 0,2288 | 3,8155 | 0,2044 | 3,1314 | 0,2357 |  |
| pain_dis |        |        |        |        |        |        |        |        |        |        |        |        |  |
| 0        | 0,9888 | 0,0087 | 0,4917 | 0,0385 | 0,9594 | 0,0188 | 0,3239 | 0,0635 | 0,1989 | 0,0482 | 0,894  | 0,0444 |  |
| 1        | 0,0064 | 0,0071 | 0,3954 | 0,0364 | 0,0315 | 0,0162 | 0,5652 | 0,0623 | 0,6175 | 0,0564 | 0,1044 | 0,0415 |  |
| 2        | 0,0047 | 0,005  | 0,0953 | 0,0212 | 0,009  | 0,0093 | 0,0066 | 0,0137 | 0,1379 | 0,0385 | 0,0015 | 0,0155 |  |
| 3        | 0      | 0,0002 | 0,0175 | 0,0104 | 0      | 0,0004 | 0,1043 | 0,0343 | 0,0456 | 0,0227 | 0      | 0,0007 |  |
| domin_bp |        |        |        |        |        |        |        |        |        |        |        |        |  |
| 0        | 0,0001 | 0,0005 | 0,1045 | 0,0234 | 0,0061 | 0,0062 | 0,2503 | 0,051  | 0,2417 | 0,0482 | 0,0002 | 0,0014 |  |

|                |        |        |        |        |        |        |        |        |        |        |        |        |
|----------------|--------|--------|--------|--------|--------|--------|--------|--------|--------|--------|--------|--------|
| 1              | 0,9999 | 0,0005 | 0,8955 | 0,0234 | 0,9939 | 0,0062 | 0,7497 | 0,051  | 0,7583 | 0,0482 | 0,9998 | 0,0014 |
| paraspin_debut |        |        |        |        |        |        |        |        |        |        |        |        |
| 0              | 0,3004 | 0,0348 | 0,3942 | 0,0395 | 0,4101 | 0,0452 | 0,3548 | 0,0608 | 0,5511 | 0,0586 | 0,3692 | 0,0623 |
| 1              | 0,6996 | 0,0348 | 0,6058 | 0,0395 | 0,5899 | 0,0452 | 0,6452 | 0,0608 | 0,4489 | 0,0586 | 0,6308 | 0,0623 |

| <b>Loadings, pain v. 2,<br/>single-item, 6-DP</b> | Clusters | R <sup>2</sup> | <b>Loadings</b>                                                                                                                                                                                                                                                                                                                                |
|---------------------------------------------------|----------|----------------|------------------------------------------------------------------------------------------------------------------------------------------------------------------------------------------------------------------------------------------------------------------------------------------------------------------------------------------------|
| dlva0                                             | 0,7261   | 0,5273         | <p>The quantities reported under Clusters are simply correlations, representing the square root of the corresponding 'R2' or communality of the associated indicator.</p> <p>Correlations: These are standardised values for the loadings reported in the Loadings output. They represent correlations between the indicators and factors.</p> |
| vasl0                                             | 0,6812   | 0,464          |                                                                                                                                                                                                                                                                                                                                                |
| vasb0                                             | 0,8315   | 0,6914         |                                                                                                                                                                                                                                                                                                                                                |
| tlep0                                             | 0,2096   | 0,0439         |                                                                                                                                                                                                                                                                                                                                                |
| tlda0                                             | 0,8163   | 0,6664         |                                                                                                                                                                                                                                                                                                                                                |
| start10                                           | 0,8312   | 0,691          |                                                                                                                                                                                                                                                                                                                                                |
| start20                                           | 0,1628   | 0,0265         |                                                                                                                                                                                                                                                                                                                                                |
| start90                                           | 0,7226   | 0,5221         |                                                                                                                                                                                                                                                                                                                                                |
| rm110                                             | 0,3765   | 0,1417         |                                                                                                                                                                                                                                                                                                                                                |
| fabq10                                            | 0,0925   | 0,0086         |                                                                                                                                                                                                                                                                                                                                                |
| fabq20                                            | 0,2204   | 0,0486         |                                                                                                                                                                                                                                                                                                                                                |
| pain_dis                                          | 0,5743   | 0,3299         |                                                                                                                                                                                                                                                                                                                                                |
| domin_bp                                          | 0,3553   | 0,1262         |                                                                                                                                                                                                                                                                                                                                                |
| paraspin_debut                                    | 0,1482   | 0,022          |                                                                                                                                                                                                                                                                                                                                                |

**Profile in numbers**

The first row of numbers shows how large each cluster is. The body of the table contains (marginal) conditional probabilities that show how the clusters are related to the Nominal or Ordinal indicator variables. These probabilities sum to 1 within each cluster (column). For indicators specified as Continuous, the body of the table contains means instead of probabilities. For indicators specified as Ordinal, means are displayed in addition to the conditional probabilities

| <b>Pain v.2, single-item, 7-DP</b> | Cluster1 | s.e.   | Cluster2 | s.e.   | Cluster3 | s.e.   | Cluster4 | s.e.   | Cluster5 | s.e.   | Cluster6 | s.e.   | Cluster7 | s.e.   |
|------------------------------------|----------|--------|----------|--------|----------|--------|----------|--------|----------|--------|----------|--------|----------|--------|
| Cluster Size                       | 25,80%   | 0,0195 | 22,55%   | 0,0224 | 17,12%   | 0,0171 | 10,77%   | 0,0131 | 10,58%   | 0,0177 | 8,79%    | 0,0112 | 4,39%    | 0,008  |
| <b>Indicators</b>                  |          |        |          |        |          |        |          |        |          |        |          |        |          |        |
| dlva0                              |          |        |          |        |          |        |          |        |          |        |          |        |          |        |
| 1                                  | 0,8669   | 0,0237 | 0,8155   | 0,034  | 0,6529   | 0,0398 | 0,1308   | 0,0382 | 0,5984   | 0,0651 | 0,0295   | 0,0185 | 0,6299   | 0,0753 |
| 2                                  | 0,1024   | 0,0149 | 0,1295   | 0,0178 | 0,1847   | 0,0183 | 0,1311   | 0,0206 | 0,1949   | 0,0196 | 0,0557   | 0,0205 | 0,1895   | 0,022  |
| 3                                  | 0,0257   | 0,0081 | 0,0436   | 0,0135 | 0,1108   | 0,0189 | 0,2787   | 0,0289 | 0,1346   | 0,0295 | 0,2228   | 0,0314 | 0,1208   | 0,0339 |
| 4                                  | 0,005    | 0,0026 | 0,0114   | 0,0059 | 0,0516   | 0,0151 | 0,4594   | 0,0561 | 0,0721   | 0,0292 | 0,6921   | 0,063  | 0,0598   | 0,0289 |
| Mean                               | 1,1687   | 0,0358 | 1,2508   | 0,0575 | 1,561    | 0,082  | 3,0666   | 0,1434 | 1,6804   | 0,1472 | 3,5775   | 0,1172 | 1,6105   | 0,1628 |
| vasl0                              |          |        |          |        |          |        |          |        |          |        |          |        |          |        |
| Mean                               | 7,6322   | 0,1198 | 7,7615   | 0,1139 | 4,6059   | 0,2002 | 7,2408   | 0,1364 | 4,8872   | 0,3355 | 5,4698   | 0,238  | 5,074    | 0,5132 |
| vasb0                              |          |        |          |        |          |        |          |        |          |        |          |        |          |        |
| 0                                  | 0,848    | 0,0331 | 0,009    | 0,0062 | 0,8833   | 0,0328 | 0,0009   | 0,0008 | 0,029    | 0,0193 | 0,558    | 0,0651 | 0,0014   | 0,0013 |
| 1                                  | 0,1517   | 0,033  | 0,5404   | 0,0413 | 0,1165   | 0,0326 | 0,2237   | 0,0506 | 0,7221   | 0,0539 | 0,4373   | 0,0634 | 0,2684   | 0,0752 |
| 2                                  | 0,0004   | 0,0003 | 0,4507   | 0,0433 | 0,0002   | 0,0002 | 0,7755   | 0,0511 | 0,2489   | 0,0589 | 0,0047   | 0,0036 | 0,7302   | 0,076  |
| Mean                               | 0,1524   | 0,0333 | 1,4417   | 0,046  | 0,1169   | 0,0329 | 1,7746   | 0,0516 | 1,22     | 0,0691 | 0,4468   | 0,067  | 1,7289   | 0,0769 |
| tlep0                              |          |        |          |        |          |        |          |        |          |        |          |        |          |        |
| 1                                  | 0,1628   | 0,022  | 0,1937   | 0,0265 | 0,2142   | 0,0302 | 0,0321   | 0,0134 | 0,162    | 0,0367 | 0,1663   | 0,0381 | 0,1421   | 0,0466 |
| 2                                  | 0,3594   | 0,0188 | 0,3732   | 0,0192 | 0,38     | 0,0189 | 0,2021   | 0,0348 | 0,359    | 0,0246 | 0,3612   | 0,0246 | 0,3472   | 0,0336 |
| 3                                  | 0,4778   | 0,0323 | 0,4331   | 0,036  | 0,4059   | 0,0384 | 0,7658   | 0,0475 | 0,479    | 0,0556 | 0,4725   | 0,0569 | 0,5108   | 0,0767 |
| Mean                               | 2,3151   | 0,052  | 2,2395   | 0,0603 | 2,1917   | 0,0665 | 2,7337   | 0,0605 | 2,317    | 0,0909 | 2,3062   | 0,0936 | 2,3687   | 0,1224 |
| tlda0                              |          |        |          |        |          |        |          |        |          |        |          |        |          |        |
| 1                                  | 0,9283   | 0,0201 | 0,9346   | 0,0293 | 0,942    | 0,0274 | 0,0484   | 0,0434 | 0,8332   | 0,0634 | 0,0074   | 0,0214 | 0,9311   | 0,0491 |
| 2                                  | 0,0717   | 0,0201 | 0,0654   | 0,0293 | 0,058    | 0,0274 | 0,9516   | 0,0434 | 0,1668   | 0,0634 | 0,9926   | 0,0214 | 0,0689   | 0,0491 |
| start10                            |          |        |          |        |          |        |          |        |          |        |          |        |          |        |
| 0                                  | 0,9657   | 0,0145 | 0,2146   | 0,0378 | 0,9975   | 0,0078 | 0,0971   | 0,0347 | 0,1615   | 0,0513 | 0,9002   | 0,0495 | 0,0034   | 0,0117 |
| 1                                  | 0,0343   | 0,0145 | 0,7854   | 0,0378 | 0,0025   | 0,0078 | 0,9029   | 0,0347 | 0,8385   | 0,0513 | 0,0998   | 0,0495 | 0,9966   | 0,0117 |
| start20                            |          |        |          |        |          |        |          |        |          |        |          |        |          |        |
| 0                                  | 0,5839   | 0,0349 | 0,5452   | 0,0398 | 0,6023   | 0,0429 | 0,3491   | 0,0531 | 0,3788   | 0,0618 | 0,4495   | 0,0616 | 0,6509   | 0,083  |

|                |        |        |        |        |        |        |        |        |        |        |        |        |        |        |
|----------------|--------|--------|--------|--------|--------|--------|--------|--------|--------|--------|--------|--------|--------|--------|
| 1              | 0,4161 | 0,0349 | 0,4548 | 0,0398 | 0,3977 | 0,0429 | 0,6509 | 0,0531 | 0,6212 | 0,0618 | 0,5505 | 0,0616 | 0,3491 | 0,083  |
| start90        |        |        |        |        |        |        |        |        |        |        |        |        |        |        |
| 0              | 0,063  | 0,0301 | 0,0357 | 0,0299 | 0,8874 | 0,0415 | 0,1328 | 0,0385 | 0,6984 | 0,0794 | 0,469  | 0,0645 | 0,3768 | 0,0852 |
| 1              | 0,937  | 0,0301 | 0,9643 | 0,0299 | 0,1126 | 0,0415 | 0,8672 | 0,0385 | 0,3016 | 0,0794 | 0,531  | 0,0645 | 0,6232 | 0,0852 |
| rm110          |        |        |        |        |        |        |        |        |        |        |        |        |        |        |
| 0              | 0,2426 | 0,0326 | 0,2277 | 0,0342 | 0,6999 | 0,0438 | 0,1615 | 0,0405 | 0,3849 | 0,0597 | 0,38   | 0,0604 | 0,2756 | 0,0757 |
| 1              | 0,7574 | 0,0326 | 0,7723 | 0,0342 | 0,3001 | 0,0438 | 0,8385 | 0,0405 | 0,6151 | 0,0597 | 0,62   | 0,0604 | 0,7244 | 0,0757 |
| fabq10         |        |        |        |        |        |        |        |        |        |        |        |        |        |        |
| 0              | 0,1366 | 0,0192 | 0,1449 | 0,0213 | 0,1811 | 0,0267 | 0,1521 | 0,0288 | 0,1904 | 0,0351 | 0,2118 | 0,0377 | 0,2193 | 0,0535 |
| 1              | 0,0661 | 0,0095 | 0,0689 | 0,0101 | 0,0805 | 0,0117 | 0,0713 | 0,012  | 0,0833 | 0,0136 | 0,0894 | 0,0142 | 0,0914 | 0,0176 |
| 2              | 0,0431 | 0,0068 | 0,0442 | 0,007  | 0,0483 | 0,0076 | 0,0451 | 0,0075 | 0,0491 | 0,008  | 0,0509 | 0,0081 | 0,0515 | 0,0086 |
| 3              | 0,2717 | 0,0152 | 0,2738 | 0,0153 | 0,2793 | 0,0151 | 0,2754 | 0,0157 | 0,2799 | 0,0151 | 0,28   | 0,0151 | 0,2796 | 0,0153 |
| 4              | 0,1115 | 0,0108 | 0,1105 | 0,0108 | 0,1054 | 0,0107 | 0,1096 | 0,011  | 0,1039 | 0,0112 | 0,1003 | 0,0113 | 0,099  | 0,0131 |
| 5              | 0,1349 | 0,0135 | 0,1315 | 0,0137 | 0,1171 | 0,0137 | 0,1285 | 0,0155 | 0,1136 | 0,0158 | 0,1059 | 0,0156 | 0,1033 | 0,0202 |
| 6              | 0,2361 | 0,0238 | 0,2262 | 0,025  | 0,1884 | 0,0256 | 0,218  | 0,0323 | 0,1798 | 0,0318 | 0,1617 | 0,0305 | 0,1559 | 0,0415 |
| Mean           | 3,5046 | 0,1474 | 3,4356 | 0,1617 | 3,1524 | 0,1875 | 3,3767 | 0,222  | 3,0837 | 0,2465 | 2,9323 | 0,252  | 2,881  | 0,3577 |
| fabq20         |        |        |        |        |        |        |        |        |        |        |        |        |        |        |
| 0              | 0,0786 | 0,0136 | 0,0912 | 0,0159 | 0,1985 | 0,0273 | 0,0753 | 0,0184 | 0,1551 | 0,03   | 0,1428 | 0,029  | 0,1706 | 0,0463 |
| 1              | 0,067  | 0,01   | 0,0747 | 0,0112 | 0,1272 | 0,0162 | 0,0649 | 0,0127 | 0,1083 | 0,017  | 0,1024 | 0,0168 | 0,1154 | 0,023  |
| 2              | 0,0951 | 0,0108 | 0,1018 | 0,0116 | 0,1356 | 0,0134 | 0,0932 | 0,0131 | 0,1259 | 0,014  | 0,1223 | 0,0141 | 0,1299 | 0,0161 |
| 3              | 0,1735 | 0,0131 | 0,1785 | 0,0134 | 0,1861 | 0,0134 | 0,172  | 0,0146 | 0,1883 | 0,0134 | 0,1879 | 0,0134 | 0,1881 | 0,0134 |
| 4              | 0,1707 | 0,0131 | 0,1687 | 0,0131 | 0,1375 | 0,0131 | 0,1711 | 0,0131 | 0,1517 | 0,0143 | 0,1555 | 0,0142 | 0,1468 | 0,0182 |
| 5              | 0,1735 | 0,0155 | 0,1648 | 0,0156 | 0,1051 | 0,0139 | 0,1759 | 0,0182 | 0,1264 | 0,0177 | 0,1331 | 0,0181 | 0,1184 | 0,0243 |
| 6              | 0,2416 | 0,0239 | 0,2204 | 0,0246 | 0,11   | 0,0187 | 0,2476 | 0,0343 | 0,1442 | 0,0273 | 0,1559 | 0,0289 | 0,1308 | 0,0379 |
| Mean           | 3,7776 | 0,1388 | 3,6347 | 0,1545 | 2,692  | 0,1817 | 3,8167 | 0,2076 | 3,0294 | 0,2358 | 3,1337 | 0,2384 | 2,9038 | 0,357  |
| pain_dis       |        |        |        |        |        |        |        |        |        |        |        |        |        |        |
| 0              | 0,9898 | 0,0081 | 0,5157 | 0,0438 | 0,9649 | 0,0169 | 0,2018 | 0,0478 | 0,4978 | 0,0684 | 0,8952 | 0,0448 | 0,0039 | 0,0122 |
| 1              | 0,0057 | 0,0065 | 0,3708 | 0,0406 | 0,0265 | 0,0145 | 0,6207 | 0,0554 | 0,484  | 0,0682 | 0,1043 | 0,0444 | 0,6729 | 0,0799 |
| 2              | 0,0045 | 0,0048 | 0,1085 | 0,0238 | 0,0085 | 0,0088 | 0,1367 | 0,0376 | 0,0091 | 0,0144 | 0,0005 | 0,0068 | 0,0003 | 0,0038 |
| 3              | 0      | 0,0002 | 0,005  | 0,0054 | 0      | 0,0003 | 0,0408 | 0,0218 | 0,0091 | 0,0115 | 0      | 0,0007 | 0,3229 | 0,0796 |
| domin_bp       |        |        |        |        |        |        |        |        |        |        |        |        |        |        |
| 0              | 0,0001 | 0,0005 | 0,0502 | 0,0226 | 0,0064 | 0,0063 | 0,2407 | 0,0477 | 0,0003 | 0,0033 | 0,0001 | 0,0013 | 0,9894 | 0,0292 |
| 1              | 0,9999 | 0,0005 | 0,9498 | 0,0226 | 0,9936 | 0,0063 | 0,7593 | 0,0477 | 0,9997 | 0,0033 | 0,9999 | 0,0013 | 0,0106 | 0,0292 |
| paraspin_debut |        |        |        |        |        |        |        |        |        |        |        |        |        |        |

|   |        |        |        |        |       |       |        |        |        |        |        |        |        |        |
|---|--------|--------|--------|--------|-------|-------|--------|--------|--------|--------|--------|--------|--------|--------|
| 0 | 0,3003 | 0,0351 | 0,3885 | 0,0424 | 0,411 | 0,046 | 0,5501 | 0,0579 | 0,3192 | 0,0618 | 0,3717 | 0,0632 | 0,5047 | 0,0939 |
| 1 | 0,6997 | 0,0351 | 0,6115 | 0,0424 | 0,589 | 0,046 | 0,4499 | 0,0579 | 0,6808 | 0,0618 | 0,6283 | 0,0632 | 0,4953 | 0,0939 |

| <b>Loadings, pain domain v.2 single-item, 7-DP</b> | Clusters | R <sup>2</sup> | <b>Loadings</b>                                                                                                                                                    |
|----------------------------------------------------|----------|----------------|--------------------------------------------------------------------------------------------------------------------------------------------------------------------|
| dlva0                                              | 0,7255   | 0,5263         | The quantities reported under Clusters are simply correlations, representing the square root of the corresponding 'R2' or communality of the associated indicator. |
| vasl0                                              | 0,6542   | 0,428          | Correlations: These are standardised values for the loadings reported in the Loadings output. They represent correlations between the indicators and factors.      |
| vasb0                                              | 0,8415   | 0,7082         |                                                                                                                                                                    |
| tlep0                                              | 0,2044   | 0,0418         |                                                                                                                                                                    |
| tlda0                                              | 0,8154   | 0,6649         |                                                                                                                                                                    |
| start10                                            | 0,8231   | 0,6775         |                                                                                                                                                                    |
| start20                                            | 0,1877   | 0,0352         |                                                                                                                                                                    |
| start90                                            | 0,7142   | 0,5101         |                                                                                                                                                                    |
| rm110                                              | 0,3749   | 0,1406         |                                                                                                                                                                    |
| fabq10                                             | 0,102    | 0,0104         |                                                                                                                                                                    |
| fabq20                                             | 0,2187   | 0,0478         |                                                                                                                                                                    |
| pain_dis                                           | 0,5923   | 0,3508         |                                                                                                                                                                    |
| domin_bp                                           | 0,7573   | 0,5735         |                                                                                                                                                                    |
| paraspin_debut                                     | 0,1594   | 0,0254         |                                                                                                                                                                    |



**Profile in numbers**

The first row of numbers shows how large each cluster is. The body of the table contains (marginal) conditional probabilities that show how the clusters are related to the Nominal or Ordinal indicator variables. These probabilities sum to 1 within each cluster (column). For indicators specified as Continuous, the body of the table contains means instead of probabilities. For indicators specified as Ordinal, means are displayed in addition to the conditional probabilities

| <b>Pain domain v.2, single-item, 8-DP</b> | Cluster1 | s.e.   | Cluster2 | s.e.   | Cluster3 | s.e.   | Cluster4 | s.e.   | Cluster5 | s.e.   | Cluster6 | s.e.   | Cluster7 | s.e.   | Cluster8 | s.e.   |
|-------------------------------------------|----------|--------|----------|--------|----------|--------|----------|--------|----------|--------|----------|--------|----------|--------|----------|--------|
| Cluster Size                              | 23,98%   | 0,021  | 21,86%   | 0,0187 | 16,76%   | 0,0164 | 11,02%   | 0,0173 | 10,62%   | 0,0138 | 6,17%    | 0,0102 | 5,08%    | 0,0093 | 4,50%    | 0,008  |
| <b>Indicators</b>                         |          |        |          |        |          |        |          |        |          |        |          |        |          |        |          |        |
| dlva0                                     |          |        |          |        |          |        |          |        |          |        |          |        |          |        |          |        |
| 1                                         | 0,8189   | 0,0306 | 0,8849   | 0,025  | 0,6516   | 0,0409 | 0,5955   | 0,0545 | 0,1453   | 0,0408 | 0,1211   | 0,0513 | 0,7637   | 0,074  | 0,0082   | 0,0087 |
| 2                                         | 0,1284   | 0,0168 | 0,0919   | 0,0163 | 0,186    | 0,0185 | 0,1964   | 0,0193 | 0,1392   | 0,0209 | 0,1268   | 0,0278 | 0,1523   | 0,0306 | 0,0251   | 0,0169 |
| 3                                         | 0,0419   | 0,012  | 0,0198   | 0,0078 | 0,1103   | 0,0191 | 0,1347   | 0,0254 | 0,2771   | 0,0281 | 0,2757   | 0,0276 | 0,0632   | 0,0301 | 0,1595   | 0,046  |
| 4                                         | 0,0108   | 0,0052 | 0,0034   | 0,0021 | 0,052    | 0,0154 | 0,0734   | 0,0241 | 0,4384   | 0,0564 | 0,4764   | 0,0796 | 0,0208   | 0,0163 | 0,8072   | 0,0701 |
| Mean                                      | 1,2447   | 0,0511 | 1,1417   | 0,0362 | 1,5627   | 0,0844 | 1,6858   | 0,1213 | 3,0087   | 0,1491 | 3,1074   | 0,2039 | 1,3411   | 0,1352 | 3,7658   | 0,1034 |
| vasl0                                     |          |        |          |        |          |        |          |        |          |        |          |        |          |        |          |        |
| Mean                                      | 7,6753   | 0,1141 | 7,6951   | 0,1196 | 4,5903   | 0,1997 | 4,433    | 0,3116 | 7,2539   | 0,1481 | 6,9571   | 0,1746 | 6,8877   | 0,3859 | 3,9222   | 0,2444 |
| vasb0                                     |          |        |          |        |          |        |          |        |          |        |          |        |          |        |          |        |
| 0                                         | 0,0074   | 0,0052 | 0,8109   | 0,0359 | 0,865    | 0,0346 | 0,0179   | 0,0125 | 0,0005   | 0,0005 | 0,4781   | 0,0864 | 0,9098   | 0,0533 | 0,5008   | 0,0875 |
| 1                                         | 0,5039   | 0,0384 | 0,1885   | 0,0356 | 0,1347   | 0,0344 | 0,6483   | 0,056  | 0,1664   | 0,0538 | 0,5141   | 0,0828 | 0,0901   | 0,0532 | 0,4923   | 0,0843 |
| 2                                         | 0,4887   | 0,0397 | 0,0006   | 0,0005 | 0,0003   | 0,0003 | 0,3339   | 0,0595 | 0,8331   | 0,0541 | 0,0078   | 0,0064 | 0,0001   | 0,0002 | 0,0069   | 0,0057 |
| Mean                                      | 1,4813   | 0,0415 | 0,1898   | 0,0362 | 0,1353   | 0,0348 | 1,316    | 0,0653 | 1,8327   | 0,0545 | 0,5297   | 0,0902 | 0,0904   | 0,0535 | 0,5061   | 0,091  |
| tlep0                                     |          |        |          |        |          |        |          |        |          |        |          |        |          |        |          |        |
| 1                                         | 0,1943   | 0,0254 | 0,1614   | 0,0242 | 0,2045   | 0,0299 | 0,146    | 0,0336 | 0,0241   | 0,0124 | 0,1354   | 0,0436 | 0,2175   | 0,0581 | 0,2126   | 0,0584 |
| 2                                         | 0,3759   | 0,019  | 0,3611   | 0,0196 | 0,3795   | 0,0193 | 0,3521   | 0,0255 | 0,1802   | 0,0391 | 0,345    | 0,0338 | 0,3833   | 0,0232 | 0,3819   | 0,0239 |
| 3                                         | 0,4298   | 0,0343 | 0,4775   | 0,0359 | 0,416    | 0,0391 | 0,5018   | 0,0541 | 0,7957   | 0,051  | 0,5196   | 0,074  | 0,3992   | 0,0736 | 0,4055   | 0,0751 |
| Mean                                      | 2,2354   | 0,0573 | 2,3161   | 0,058  | 2,2115   | 0,0669 | 2,3558   | 0,0864 | 2,7715   | 0,0631 | 2,3842   | 0,1166 | 2,1818   | 0,1306 | 2,193    | 0,1325 |
| tlda0                                     |          |        |          |        |          |        |          |        |          |        |          |        |          |        |          |        |
| 1                                         | 0,9567   | 0,0257 | 0,9493   | 0,0241 | 0,9295   | 0,0275 | 0,8654   | 0,0465 | 0,0798   | 0,0547 | 0,0098   | 0,0286 | 0,9515   | 0,0469 | 0,0131   | 0,0423 |
| 2                                         | 0,0433   | 0,0257 | 0,0507   | 0,0241 | 0,0705   | 0,0275 | 0,1346   | 0,0465 | 0,9202   | 0,0547 | 0,9902   | 0,0286 | 0,0485   | 0,0469 | 0,9869   | 0,0423 |
| start10                                   |          |        |          |        |          |        |          |        |          |        |          |        |          |        |          |        |
| 0                                         | 0,1783   | 0,0318 | 0,9622   | 0,017  | 0,9957   | 0,0102 | 0,0845   | 0,0384 | 0,0717   | 0,0287 | 0,8426   | 0,0779 | 0,965    | 0,0349 | 0,8227   | 0,0663 |
| 1                                         | 0,8217   | 0,0318 | 0,0378   | 0,017  | 0,0043   | 0,0102 | 0,9155   | 0,0384 | 0,9283   | 0,0287 | 0,1574   | 0,0779 | 0,035    | 0,0349 | 0,1773   | 0,0663 |
| start20                                   |          |        |          |        |          |        |          |        |          |        |          |        |          |        |          |        |

|          |        |        |        |        |        |        |        |        |        |        |        |        |        |        |        |        |
|----------|--------|--------|--------|--------|--------|--------|--------|--------|--------|--------|--------|--------|--------|--------|--------|--------|
| 0        | 0,552  | 0,0377 | 0,5738 | 0,0388 | 0,5952 | 0,0433 | 0,4448 | 0,0587 | 0,3676 | 0,0548 | 0,4395 | 0,0749 | 0,6307 | 0,0833 | 0,3869 | 0,0842 |
| 1        | 0,448  | 0,0377 | 0,4262 | 0,0388 | 0,4048 | 0,0433 | 0,5552 | 0,0587 | 0,6324 | 0,0548 | 0,5605 | 0,0749 | 0,3693 | 0,0833 | 0,6131 | 0,0842 |
| start90  |        |        |        |        |        |        |        |        |        |        |        |        |        |        |        |        |
| 0        | 0,0567 | 0,0294 | 0,0698 | 0,0344 | 0,89   | 0,0389 | 0,6985 | 0,0654 | 0,1329 | 0,0409 | 0,0508 | 0,0415 | 0,1848 | 0,075  | 0,9103 | 0,0574 |
| 1        | 0,9433 | 0,0294 | 0,9302 | 0,0344 | 0,11   | 0,0389 | 0,3015 | 0,0654 | 0,8671 | 0,0409 | 0,9492 | 0,0415 | 0,8152 | 0,075  | 0,0897 | 0,0574 |
| rm110    |        |        |        |        |        |        |        |        |        |        |        |        |        |        |        |        |
| 0        | 0,2324 | 0,0324 | 0,2602 | 0,0367 | 0,7165 | 0,043  | 0,3747 | 0,0569 | 0,1694 | 0,0414 | 0,1828 | 0,0614 | 0,1975 | 0,0727 | 0,54   | 0,0844 |
| 1        | 0,7676 | 0,0324 | 0,7398 | 0,0367 | 0,2835 | 0,043  | 0,6253 | 0,0569 | 0,8306 | 0,0414 | 0,8172 | 0,0614 | 0,8025 | 0,0727 | 0,46   | 0,0844 |
| fabq10   |        |        |        |        |        |        |        |        |        |        |        |        |        |        |        |        |
| 0        | 0,1366 | 0,0198 | 0,1829 | 0,0252 | 0,192  | 0,0282 | 0,1972 | 0,0345 | 0,1376 | 0,0281 | 0,2555 | 0,0531 | 0      | 0      | 0,1425 | 0,0425 |
| 1        | 0,0674 | 0,0097 | 0,0824 | 0,0116 | 0,0851 | 0,0123 | 0,0867 | 0,0136 | 0,0677 | 0,012  | 0,1023 | 0,0172 | 0      | 0      | 0,0694 | 0,0162 |
| 2        | 0,0448 | 0,0071 | 0,0501 | 0,0078 | 0,0509 | 0,008  | 0,0514 | 0,0082 | 0,0449 | 0,0076 | 0,0552 | 0,0087 | 0      | 0      | 0,0456 | 0,0087 |
| 3        | 0,2868 | 0,0159 | 0,2932 | 0,0157 | 0,2933 | 0,0157 | 0,2933 | 0,0157 | 0,287  | 0,0166 | 0,2871 | 0,0177 | 0,0008 | 0,0022 | 0,2882 | 0,0179 |
| 4        | 0,1194 | 0,0117 | 0,1116 | 0,0113 | 0,1098 | 0,0115 | 0,1088 | 0,0121 | 0,1193 | 0,012  | 0,0971 | 0,0141 | 0,004  | 0,007  | 0,1185 | 0,013  |
| 5        | 0,1435 | 0,0149 | 0,1225 | 0,0142 | 0,1187 | 0,0148 | 0,1166 | 0,0167 | 0,143  | 0,0177 | 0,0947 | 0,0198 | 0,0566 | 0,047  | 0,1406 | 0,0231 |
| 6        | 0,2016 | 0,0228 | 0,1574 | 0,0224 | 0,1501 | 0,0232 | 0,146  | 0,027  | 0,2006 | 0,0315 | 0,1081 | 0,0306 | 0,9386 | 0,0562 | 0,1952 | 0,0456 |
| Mean     | 3,4218 | 0,1486 | 3,0653 | 0,1708 | 3,0003 | 0,1877 | 2,9637 | 0,231  | 3,414  | 0,2211 | 2,5844 | 0,3199 | 5,9329 | 0,0676 | 3,3733 | 0,338  |
| fabq20   |        |        |        |        |        |        |        |        |        |        |        |        |        |        |        |        |
| 0        | 0,0811 | 0,0143 | 0,1124 | 0,0184 | 0,2108 | 0,0285 | 0,1742 | 0,0318 | 0,0596 | 0,0166 | 0,1682 | 0,0425 | 0      | 0      | 0,0931 | 0,0312 |
| 1        | 0,0702 | 0,0105 | 0,0887 | 0,0126 | 0,1342 | 0,0167 | 0,1191 | 0,0177 | 0,056  | 0,0123 | 0,1164 | 0,0219 | 0      | 0      | 0,0776 | 0,0196 |
| 2        | 0,1009 | 0,0114 | 0,116  | 0,0125 | 0,1417 | 0,0138 | 0,1351 | 0,0142 | 0,0873 | 0,0136 | 0,1337 | 0,0159 | 0      | 0      | 0,1073 | 0,0178 |
| 3        | 0,1859 | 0,0139 | 0,1946 | 0,0141 | 0,1918 | 0,0141 | 0,1964 | 0,0141 | 0,1744 | 0,0159 | 0,1968 | 0,0141 | 0,0001 | 0,0006 | 0,1901 | 0,0161 |
| 4        | 0,1836 | 0,0142 | 0,1751 | 0,014  | 0,1393 | 0,0141 | 0,1532 | 0,0159 | 0,1869 | 0,0143 | 0,1554 | 0,0191 | 0,0026 | 0,0072 | 0,1807 | 0,0159 |
| 5        | 0,1841 | 0,0174 | 0,1598 | 0,0168 | 0,1026 | 0,0147 | 0,1212 | 0,0189 | 0,2033 | 0,0215 | 0,1245 | 0,0251 | 0,048  | 0,0651 | 0,1743 | 0,0272 |
| 6        | 0,1942 | 0,0225 | 0,1535 | 0,0212 | 0,0796 | 0,0154 | 0,1009 | 0,0217 | 0,2326 | 0,0345 | 0,105  | 0,0303 | 0,9493 | 0,0729 | 0,1769 | 0,0419 |
| Mean     | 3,65   | 0,1412 | 3,3245 | 0,1576 | 2,5407 | 0,1777 | 2,8022 | 0,2277 | 3,9134 | 0,2069 | 2,8484 | 0,3201 | 5,9465 | 0,0814 | 3,5181 | 0,3185 |
| pain_dis |        |        |        |        |        |        |        |        |        |        |        |        |        |        |        |        |
| 0        | 0,4901 | 0,0393 | 0,9935 | 0,0068 | 0,9591 | 0,0193 | 0,334  | 0,0639 | 0,1884 | 0,0482 | 0,8505 | 0,0672 | 0,9702 | 0,0298 | 0,786  | 0,0703 |
| 1        | 0,3985 | 0,0372 | 0,0004 | 0,0023 | 0,0316 | 0,0168 | 0,5503 | 0,0623 | 0,6483 | 0,0566 | 0,083  | 0,0482 | 0,0295 | 0,0297 | 0,2138 | 0,0703 |
| 2        | 0,0956 | 0,0214 | 0,0061 | 0,0063 | 0,0093 | 0,0095 | 0,0072 | 0,0139 | 0,1136 | 0,0366 | 0,0664 | 0,0428 | 0,0002 | 0,0029 | 0,0001 | 0,0018 |
| 3        | 0,0158 | 0,0109 | 0      | 0,0003 | 0      | 0,0003 | 0,1084 | 0,0358 | 0,0497 | 0,0244 | 0      | 0,0009 | 0,0001 | 0,0011 | 0,0001 | 0,0012 |
| domin_bp |        |        |        |        |        |        |        |        |        |        |        |        |        |        |        |        |
| 0        | 0,1033 | 0,0244 | 0,0001 | 0,0005 | 0,0063 | 0,0064 | 0,2542 | 0,0522 | 0,2629 | 0,0507 | 0,0002 | 0,0018 | 0,0002 | 0,0022 | 0,0002 | 0,0025 |
| 1        | 0,8967 | 0,0244 | 0,9999 | 0,0005 | 0,9937 | 0,0064 | 0,7458 | 0,0522 | 0,7371 | 0,0507 | 0,9998 | 0,0018 | 0,9998 | 0,0022 | 0,9998 | 0,0025 |

|                |        |        |        |        |        |        |        |        |        |        |        |        |        |        |        |        |
|----------------|--------|--------|--------|--------|--------|--------|--------|--------|--------|--------|--------|--------|--------|--------|--------|--------|
| paraspin_debut |        |        |        |        |        |        |        |        |        |        |        |        |        |        |        |        |
| 0              | 0,3916 | 0,0402 | 0,3149 | 0,0396 | 0,4142 | 0,0464 | 0,3514 | 0,0609 | 0,5642 | 0,0599 | 0,2606 | 0,0742 | 0,2716 | 0,0821 | 0,4917 | 0,0895 |
| 1              | 0,6084 | 0,0402 | 0,6851 | 0,0396 | 0,5858 | 0,0464 | 0,6486 | 0,0609 | 0,4358 | 0,0599 | 0,7394 | 0,0742 | 0,7284 | 0,0821 | 0,5083 | 0,0895 |

| Loadings, 8-DP | Clusters | R <sup>2</sup> | Loadings                                                                                                                                                                                                                                                                                                                                                  |
|----------------|----------|----------------|-----------------------------------------------------------------------------------------------------------------------------------------------------------------------------------------------------------------------------------------------------------------------------------------------------------------------------------------------------------|
| dlva0          | 0,7197   | 0,518          | <p>The quantities reported under Clusters are simply correlations, representing the square root of the corresponding 'R<sup>2</sup>' or communality of the associated indicator.</p> <p>Correlations: These are standardised values for the loadings reported in the Loadings output. They represent correlations between the indicators and factors.</p> |
| vasl0          | 0,7032   | 0,4945         |                                                                                                                                                                                                                                                                                                                                                           |
| vasb0          | 0,8352   | 0,6976         |                                                                                                                                                                                                                                                                                                                                                           |
| tlep0          | 0,224    | 0,0502         |                                                                                                                                                                                                                                                                                                                                                           |
| tlda0          | 0,8405   | 0,7065         |                                                                                                                                                                                                                                                                                                                                                           |
| start10        | 0,8304   | 0,6896         |                                                                                                                                                                                                                                                                                                                                                           |
| start20        | 0,1643   | 0,027          |                                                                                                                                                                                                                                                                                                                                                           |
| start90        | 0,7573   | 0,5735         |                                                                                                                                                                                                                                                                                                                                                           |
| rm110          | 0,3984   | 0,1588         |                                                                                                                                                                                                                                                                                                                                                           |
| fabq10         | 0,3191   | 0,1019         |                                                                                                                                                                                                                                                                                                                                                           |
| fabq20         | 0,379    | 0,1436         |                                                                                                                                                                                                                                                                                                                                                           |
| pain_dis       | 0,5695   | 0,3244         |                                                                                                                                                                                                                                                                                                                                                           |
| domin_bp       | 0,3709   | 0,1376         |                                                                                                                                                                                                                                                                                                                                                           |
| paraspin_debut | 0,1706   | 0,0291         |                                                                                                                                                                                                                                                                                                                                                           |

**Profile in numbers**

The first row of numbers shows how large each cluster is. The body of the table contains (marginal) conditional probabilities that show how the clusters are related to the Nominal or Ordinal indicator variables. These probabilities sum to 1 within each cluster (column). For indicators specified as Continuous, the body of the table contains means instead of probabilities. For indicators specified as Ordinal, means are displayed in addition to the conditional probabilities

| Pain v2,<br>single-item<br>9-DP | Cluster<br>1 | s.e.   | Cluster<br>2 | s.e.   | Cluster<br>3 | s.e.   | Cluster<br>4 | s.e.   | Cluster<br>5 | s.e.   | Cluster<br>6 | s.e.   | Cluster<br>7 | s.e.   | Cluster<br>8 | s.e.   | Cluster<br>9 | s.e.   |
|---------------------------------|--------------|--------|--------------|--------|--------------|--------|--------------|--------|--------------|--------|--------------|--------|--------------|--------|--------------|--------|--------------|--------|
| Cluster Size                    | 21,65%       | 0,0185 | 20,37%       | 0,0265 | 16,34%       | 0,0163 | 11,41%       | 0,0233 | 10,55%       | 0,013  | 5,93%        | 0,0101 | 5,04%        | 0,0092 | 4,57%        | 0,009  | 4,12%        | 0,008  |
| Indicators                      |              |        |              |        |              |        |              |        |              |        |              |        |              |        |              |        |              |        |
| dlva0                           |              |        |              |        |              |        |              |        |              |        |              |        |              |        |              |        |              |        |
| 1                               | 0,8852       | 0,0251 | 0,8279       | 0,037  | 0,6498       | 0,0431 | 0,6573       | 0,0574 | 0,1356       | 0,039  | 0,1088       | 0,0529 | 0,7664       | 0,0742 | 0,0077       | 0,0083 | 0,6203       | 0,0797 |
| 2                               | 0,0918       | 0,0165 | 0,1243       | 0,0197 | 0,1872       | 0,0189 | 0,1855       | 0,0203 | 0,1357       | 0,0207 | 0,1209       | 0,03   | 0,1518       | 0,031  | 0,0244       | 0,0166 | 0,1932       | 0,023  |
| 3                               | 0,0197       | 0,0078 | 0,0386       | 0,0142 | 0,1117       | 0,0201 | 0,1084       | 0,0259 | 0,281        | 0,0301 | 0,2781       | 0,0293 | 0,0622       | 0,0304 | 0,1601       | 0,0466 | 0,1246       | 0,036  |
| 4                               | 0,0033       | 0,0021 | 0,0092       | 0,0058 | 0,0512       | 0,0173 | 0,0487       | 0,0217 | 0,4477       | 0,0553 | 0,4921       | 0,0852 | 0,0196       | 0,016  | 0,8078       | 0,0699 | 0,0618       | 0,0311 |
| Mean                            | 1,1411       | 0,0362 | 1,2292       | 0,0612 | 1,5643       | 0,0911 | 1,5485       | 0,122  | 3,0409       | 0,1429 | 3,1536       | 0,2149 | 1,3351       | 0,1351 | 3,768        | 0,1021 | 1,628        | 0,1732 |
| vasl0                           |              |        |              |        |              |        |              |        |              |        |              |        |              |        |              |        |              |        |
| Mean                            | 7,6986       | 0,1196 | 7,8281       | 0,1276 | 4,5787       | 0,2041 | 5,2346       | 0,4211 | 7,2276       | 0,1457 | 6,9424       | 0,1798 | 6,8955       | 0,3888 | 3,8781       | 0,2559 | 4,886        | 0,5593 |
| vasb0                           |              |        |              |        |              |        |              |        |              |        |              |        |              |        |              |        |              |        |
| 0                               | 0,8178       | 0,0362 | 0,0075       | 0,0053 | 0,885        | 0,0328 | 0,0222       | 0,0152 | 0,0005       | 0,0005 | 0,4998       | 0,0871 | 0,9139       | 0,0523 | 0,488        | 0,0889 | 0,0014       | 0,0013 |
| 1                               | 0,1817       | 0,036  | 0,5242       | 0,0449 | 0,1148       | 0,0327 | 0,6984       | 0,061  | 0,1809       | 0,0519 | 0,4939       | 0,0841 | 0,086        | 0,0522 | 0,5053       | 0,0855 | 0,282        | 0,0808 |
| 2                               | 0,0005       | 0,0004 | 0,4683       | 0,0466 | 0,0002       | 0,0002 | 0,2794       | 0,0657 | 0,8185       | 0,0523 | 0,0062       | 0,0051 | 0,0001       | 0,0001 | 0,0067       | 0,0056 | 0,7166       | 0,0817 |
| Mean                            | 0,1827       | 0,0365 | 1,4609       | 0,0488 | 0,1152       | 0,033  | 1,2571       | 0,0733 | 1,818        | 0,0526 | 0,5064       | 0,0903 | 0,0862       | 0,0524 | 0,5187       | 0,0925 | 1,7152       | 0,0827 |
| tlep0                           |              |        |              |        |              |        |              |        |              |        |              |        |              |        |              |        |              |        |
| 1                               | 0,161        | 0,0243 | 0,2005       | 0,0292 | 0,2064       | 0,0307 | 0,1497       | 0,0333 | 0,0275       | 0,0126 | 0,1351       | 0,0445 | 0,2191       | 0,0584 | 0,21         | 0,0595 | 0,1387       | 0,0473 |
| 2                               | 0,3602       | 0,0197 | 0,3773       | 0,0195 | 0,3793       | 0,0193 | 0,3536       | 0,0247 | 0,1901       | 0,0367 | 0,344        | 0,0344 | 0,383        | 0,0231 | 0,3804       | 0,0246 | 0,3466       | 0,0351 |
| 3                               | 0,4788       | 0,0361 | 0,4222       | 0,039  | 0,4143       | 0,0399 | 0,4967       | 0,0526 | 0,7824       | 0,0487 | 0,5209       | 0,0755 | 0,398        | 0,0737 | 0,4095       | 0,0772 | 0,5147       | 0,0791 |
| Mean                            | 2,3178       | 0,0583 | 2,2217       | 0,0661 | 2,2078       | 0,0685 | 2,347        | 0,0845 | 2,755        | 0,061  | 2,3858       | 0,1191 | 2,1789       | 0,131  | 2,1995       | 0,1356 | 2,376        | 0,1255 |
| tlda0                           |              |        |              |        |              |        |              |        |              |        |              |        |              |        |              |        |              |        |
| 1                               | 0,9483       | 0,0243 | 0,9494       | 0,0286 | 0,9278       | 0,0283 | 0,8915       | 0,0454 | 0,0607       | 0,0479 | 0,0096       | 0,0291 | 0,9536       | 0,0459 | 0,0288       | 0,0937 | 0,9329       | 0,0485 |
| 2                               | 0,0517       | 0,0243 | 0,0506       | 0,0286 | 0,0722       | 0,0283 | 0,1085       | 0,0454 | 0,9393       | 0,0479 | 0,9904       | 0,0291 | 0,0464       | 0,0459 | 0,9712       | 0,0937 | 0,0671       | 0,0485 |
| start10                         |              |        |              |        |              |        |              |        |              |        |              |        |              |        |              |        |              |        |
| 0                               | 0,9638       | 0,0165 | 0,1995       | 0,0369 | 0,9979       | 0,0076 | 0,1532       | 0,0475 | 0,0732       | 0,0291 | 0,8674       | 0,0736 | 0,9656       | 0,0344 | 0,8103       | 0,072  | 0,0026       | 0,0101 |
| 1                               | 0,0362       | 0,0165 | 0,8005       | 0,0369 | 0,0021       | 0,0076 | 0,8468       | 0,0475 | 0,9268       | 0,0291 | 0,1326       | 0,0736 | 0,0344       | 0,0344 | 0,1897       | 0,072  | 0,9974       | 0,0101 |
| start20                         |              |        |              |        |              |        |              |        |              |        |              |        |              |        |              |        |              |        |

|          |        |        |        |        |        |        |        |        |        |        |        |        |        |        |        |        |        |        |
|----------|--------|--------|--------|--------|--------|--------|--------|--------|--------|--------|--------|--------|--------|--------|--------|--------|--------|--------|
| 0        | 0,5747 | 0,0391 | 0,5549 | 0,0429 | 0,5983 | 0,0442 | 0,4108 | 0,0613 | 0,357  | 0,054  | 0,4475 | 0,0769 | 0,6334 | 0,0837 | 0,3807 | 0,0853 | 0,6495 | 0,086  |
| 1        | 0,4253 | 0,0391 | 0,4451 | 0,0429 | 0,4017 | 0,0442 | 0,5892 | 0,0613 | 0,643  | 0,054  | 0,5525 | 0,0769 | 0,3666 | 0,0837 | 0,6193 | 0,0853 | 0,3505 | 0,086  |
| start90  |        |        |        |        |        |        |        |        |        |        |        |        |        |        |        |        |        |        |
| 0        | 0,0693 | 0,0345 | 0,0093 | 0,0407 | 0,8882 | 0,0395 | 0,6538 | 0,089  | 0,1446 | 0,041  | 0,0493 | 0,0425 | 0,1856 | 0,0758 | 0,9161 | 0,0544 | 0,3996 | 0,0923 |
| 1        | 0,9307 | 0,0345 | 0,9907 | 0,0407 | 0,1118 | 0,0395 | 0,3462 | 0,089  | 0,8554 | 0,041  | 0,9507 | 0,0425 | 0,8144 | 0,0758 | 0,0839 | 0,0544 | 0,6004 | 0,0923 |
| rm110    |        |        |        |        |        |        |        |        |        |        |        |        |        |        |        |        |        |        |
| 0        | 0,2592 | 0,0369 | 0,2208 | 0,0369 | 0,7176 | 0,0434 | 0,3835 | 0,0584 | 0,1704 | 0,0414 | 0,1899 | 0,0633 | 0,1988 | 0,0732 | 0,5363 | 0,0853 | 0,2815 | 0,079  |
| 1        | 0,7408 | 0,0369 | 0,7792 | 0,0369 | 0,2824 | 0,0434 | 0,6165 | 0,0584 | 0,8296 | 0,0414 | 0,8101 | 0,0633 | 0,8012 | 0,0732 | 0,4637 | 0,0853 | 0,7185 | 0,079  |
| fabq10   |        |        |        |        |        |        |        |        |        |        |        |        |        |        |        |        |        |        |
| 0        | 0,1829 | 0,0253 | 0,1241 | 0,0216 | 0,1925 | 0,0287 | 0,1882 | 0,0338 | 0,1404 | 0,0282 | 0,2539 | 0,054  | 0      | 0      | 0,1454 | 0,0434 | 0,2206 | 0,0558 |
| 1        | 0,0825 | 0,0116 | 0,063  | 0,0101 | 0,0854 | 0,0124 | 0,0841 | 0,0135 | 0,0687 | 0,012  | 0,102  | 0,0174 | 0      | 0      | 0,0705 | 0,0164 | 0,0934 | 0,0182 |
| 2        | 0,0501 | 0,0078 | 0,043  | 0,007  | 0,051  | 0,008  | 0,0506 | 0,0081 | 0,0453 | 0,0076 | 0,0552 | 0,0087 | 0      | 0      | 0,046  | 0,0087 | 0,0532 | 0,0088 |
| 3        | 0,2935 | 0,0158 | 0,2834 | 0,0163 | 0,2936 | 0,0157 | 0,2936 | 0,0157 | 0,2881 | 0,0165 | 0,2877 | 0,0178 | 0,0008 | 0,002  | 0,2892 | 0,0177 | 0,2923 | 0,0164 |
| 4        | 0,1116 | 0,0113 | 0,1212 | 0,0118 | 0,1098 | 0,0115 | 0,1106 | 0,0121 | 0,1189 | 0,012  | 0,0974 | 0,0142 | 0,0038 | 0,0067 | 0,1181 | 0,0131 | 0,1042 | 0,0147 |
| 5        | 0,1224 | 0,0143 | 0,1495 | 0,0161 | 0,1184 | 0,0149 | 0,1202 | 0,0169 | 0,1415 | 0,0176 | 0,0951 | 0,0202 | 0,0553 | 0,0466 | 0,1391 | 0,0232 | 0,1073 | 0,0228 |
| 6        | 0,157  | 0,0224 | 0,2157 | 0,0267 | 0,1493 | 0,0235 | 0,1527 | 0,0278 | 0,1971 | 0,0311 | 0,1087 | 0,0313 | 0,9402 | 0,0553 | 0,1917 | 0,0457 | 0,1291 | 0,0378 |
| Mean     | 3,0634 | 0,1718 | 3,5262 | 0,1726 | 2,9953 | 0,1915 | 3,0255 | 0,2314 | 3,3893 | 0,2201 | 2,5929 | 0,3267 | 5,9348 | 0,0662 | 3,3482 | 0,3421 | 2,8041 | 0,3616 |
| fabq20   |        |        |        |        |        |        |        |        |        |        |        |        |        |        |        |        |        |        |
| 0        | 0,113  | 0,0186 | 0,0742 | 0,0154 | 0,2129 | 0,0293 | 0,1489 | 0,0296 | 0,0618 | 0,017  | 0,165  | 0,0425 | 0      | 0      | 0,0963 | 0,0316 | 0,1756 | 0,0504 |
| 1        | 0,0889 | 0,0126 | 0,0658 | 0,0111 | 0,1349 | 0,017  | 0,1074 | 0,0171 | 0,0575 | 0,0125 | 0,1149 | 0,022  | 0      | 0      | 0,0794 | 0,0196 | 0,1196 | 0,0246 |
| 2        | 0,1161 | 0,0125 | 0,0968 | 0,012  | 0,1419 | 0,0138 | 0,1285 | 0,0143 | 0,0887 | 0,0136 | 0,1328 | 0,016  | 0      | 0      | 0,1087 | 0,0176 | 0,1352 | 0,0166 |
| 3        | 0,1945 | 0,014  | 0,1826 | 0,0142 | 0,1914 | 0,0141 | 0,1973 | 0,014  | 0,1757 | 0,0158 | 0,1968 | 0,0141 | 0,0001 | 0,0005 | 0,1908 | 0,0158 | 0,1961 | 0,0144 |
| 4        | 0,1748 | 0,014  | 0,1849 | 0,0143 | 0,1385 | 0,0143 | 0,1625 | 0,0157 | 0,1866 | 0,0143 | 0,1566 | 0,0191 | 0,0023 | 0,0068 | 0,1797 | 0,016  | 0,1526 | 0,0216 |
| 5        | 0,1595 | 0,0168 | 0,1901 | 0,0187 | 0,1018 | 0,015  | 0,1359 | 0,0198 | 0,2012 | 0,0214 | 0,1264 | 0,0254 | 0,0456 | 0,0644 | 0,1719 | 0,0269 | 0,1206 | 0,0284 |
| 6        | 0,1533 | 0,0212 | 0,2057 | 0,026  | 0,0788 | 0,0157 | 0,1196 | 0,0244 | 0,2285 | 0,0342 | 0,1075 | 0,031  | 0,952  | 0,0717 | 0,1731 | 0,041  | 0,1003 | 0,0336 |
| Mean     | 3,3208 | 0,1585 | 3,7312 | 0,1632 | 2,5281 | 0,1829 | 3,0033 | 0,2307 | 3,8853 | 0,2075 | 2,8745 | 0,3231 | 5,9495 | 0,0795 | 3,4862 | 0,3164 | 2,7934 | 0,3717 |
| pain_dis |        |        |        |        |        |        |        |        |        |        |        |        |        |        |        |        |        |        |
| 0        | 0,9938 | 0,0065 | 0,4887 | 0,0522 | 0,9649 | 0,0175 | 0,5373 | 0,0723 | 0,1952 | 0,0476 | 0,8676 | 0,0661 | 0,9707 | 0,0297 | 0,7718 | 0,0724 | 0,0032 | 0,0113 |
| 1        | 0,0003 | 0,0019 | 0,3929 | 0,0466 | 0,0262 | 0,0151 | 0,4434 | 0,0715 | 0,6441 | 0,0559 | 0,0746 | 0,0471 | 0,0291 | 0,0295 | 0,2281 | 0,0723 | 0,6569 | 0,0856 |
| 2        | 0,0059 | 0,0062 | 0,1134 | 0,0266 | 0,0089 | 0,0091 | 0,0101 | 0,0153 | 0,1172 | 0,0367 | 0,0577 | 0,0422 | 0,0002 | 0,0028 | 0,0001 | 0,0016 | 0,0002 | 0,0029 |
| 3        | 0      | 0,0002 | 0,005  | 0,0059 | 0      | 0,0003 | 0,0093 | 0,0113 | 0,0434 | 0,0225 | 0      | 0,0009 | 0      | 0,0011 | 0,0001 | 0,0011 | 0,3397 | 0,0854 |
| domin_bp |        |        |        |        |        |        |        |        |        |        |        |        |        |        |        |        |        |        |
| 0        | 0      | 0,0005 | 0,0653 | 0,0285 | 0,0066 | 0,0066 | 0,0002 | 0,0021 | 0,2517 | 0,0489 | 0,0002 | 0,0018 | 0,0002 | 0,002  | 0,0002 | 0,0023 | 0,9912 | 0,0275 |
| 1        | 1      | 0,0005 | 0,9347 | 0,0285 | 0,9934 | 0,0066 | 0,9998 | 0,0021 | 0,7483 | 0,0489 | 0,9998 | 0,0018 | 0,9998 | 0,002  | 0,9998 | 0,0023 | 0,0088 | 0,0275 |

|                |        |        |        |        |        |        |        |        |        |        |        |        |        |        |        |        |       |        |
|----------------|--------|--------|--------|--------|--------|--------|--------|--------|--------|--------|--------|--------|--------|--------|--------|--------|-------|--------|
| paraspin_debut |        |        |        |        |        |        |        |        |        |        |        |        |        |        |        |        |       |        |
| 0              | 0,3143 | 0,0398 | 0,3928 | 0,0451 | 0,4136 | 0,0473 | 0,3164 | 0,0589 | 0,5595 | 0,0587 | 0,2607 | 0,0752 | 0,2735 | 0,0826 | 0,4897 | 0,0897 | 0,498 | 0,0974 |
| 1              | 0,6857 | 0,0398 | 0,6072 | 0,0451 | 0,5864 | 0,0473 | 0,6836 | 0,0589 | 0,4405 | 0,0587 | 0,7393 | 0,0752 | 0,7265 | 0,0826 | 0,5103 | 0,0897 | 0,502 | 0,0974 |

| Loadings, 9-DP | Clusters | R <sup>2</sup> | Loadings                                                                                                                                                                                                                                                                                                                                       |
|----------------|----------|----------------|------------------------------------------------------------------------------------------------------------------------------------------------------------------------------------------------------------------------------------------------------------------------------------------------------------------------------------------------|
| dlva0          | 0,7269   | 0,5284         | <p>The quantities reported under Clusters are simply correlations, representing the square root of the corresponding 'R2' or communality of the associated indicator.</p> <p>Correlations: These are standardised values for the loadings reported in the Loadings output. They represent correlations between the indicators and factors.</p> |
| vasl0          | 0,6778   | 0,4595         |                                                                                                                                                                                                                                                                                                                                                |
| vasb0          | 0,8413   | 0,7078         |                                                                                                                                                                                                                                                                                                                                                |
| tlep0          | 0,2186   | 0,0478         |                                                                                                                                                                                                                                                                                                                                                |
| tlda0          | 0,8418   | 0,7087         |                                                                                                                                                                                                                                                                                                                                                |
| start10        | 0,825    | 0,6807         |                                                                                                                                                                                                                                                                                                                                                |
| start20        | 0,1856   | 0,0345         |                                                                                                                                                                                                                                                                                                                                                |
| start90        | 0,7526   | 0,5664         |                                                                                                                                                                                                                                                                                                                                                |
| rm110          | 0,3962   | 0,157          |                                                                                                                                                                                                                                                                                                                                                |
| fabq10         | 0,3222   | 0,1038         |                                                                                                                                                                                                                                                                                                                                                |
| fabq20         | 0,3769   | 0,1421         |                                                                                                                                                                                                                                                                                                                                                |
| pain_dis       | 0,588    | 0,3457         |                                                                                                                                                                                                                                                                                                                                                |
| domin_bp       | 0,7417   | 0,5501         |                                                                                                                                                                                                                                                                                                                                                |
| paraspin_debut | 0,1787   | 0,0319         |                                                                                                                                                                                                                                                                                                                                                |

## Pain domain v.2, single-item strategy, 6-domain profiles

Smallest cluster size = 9.00%

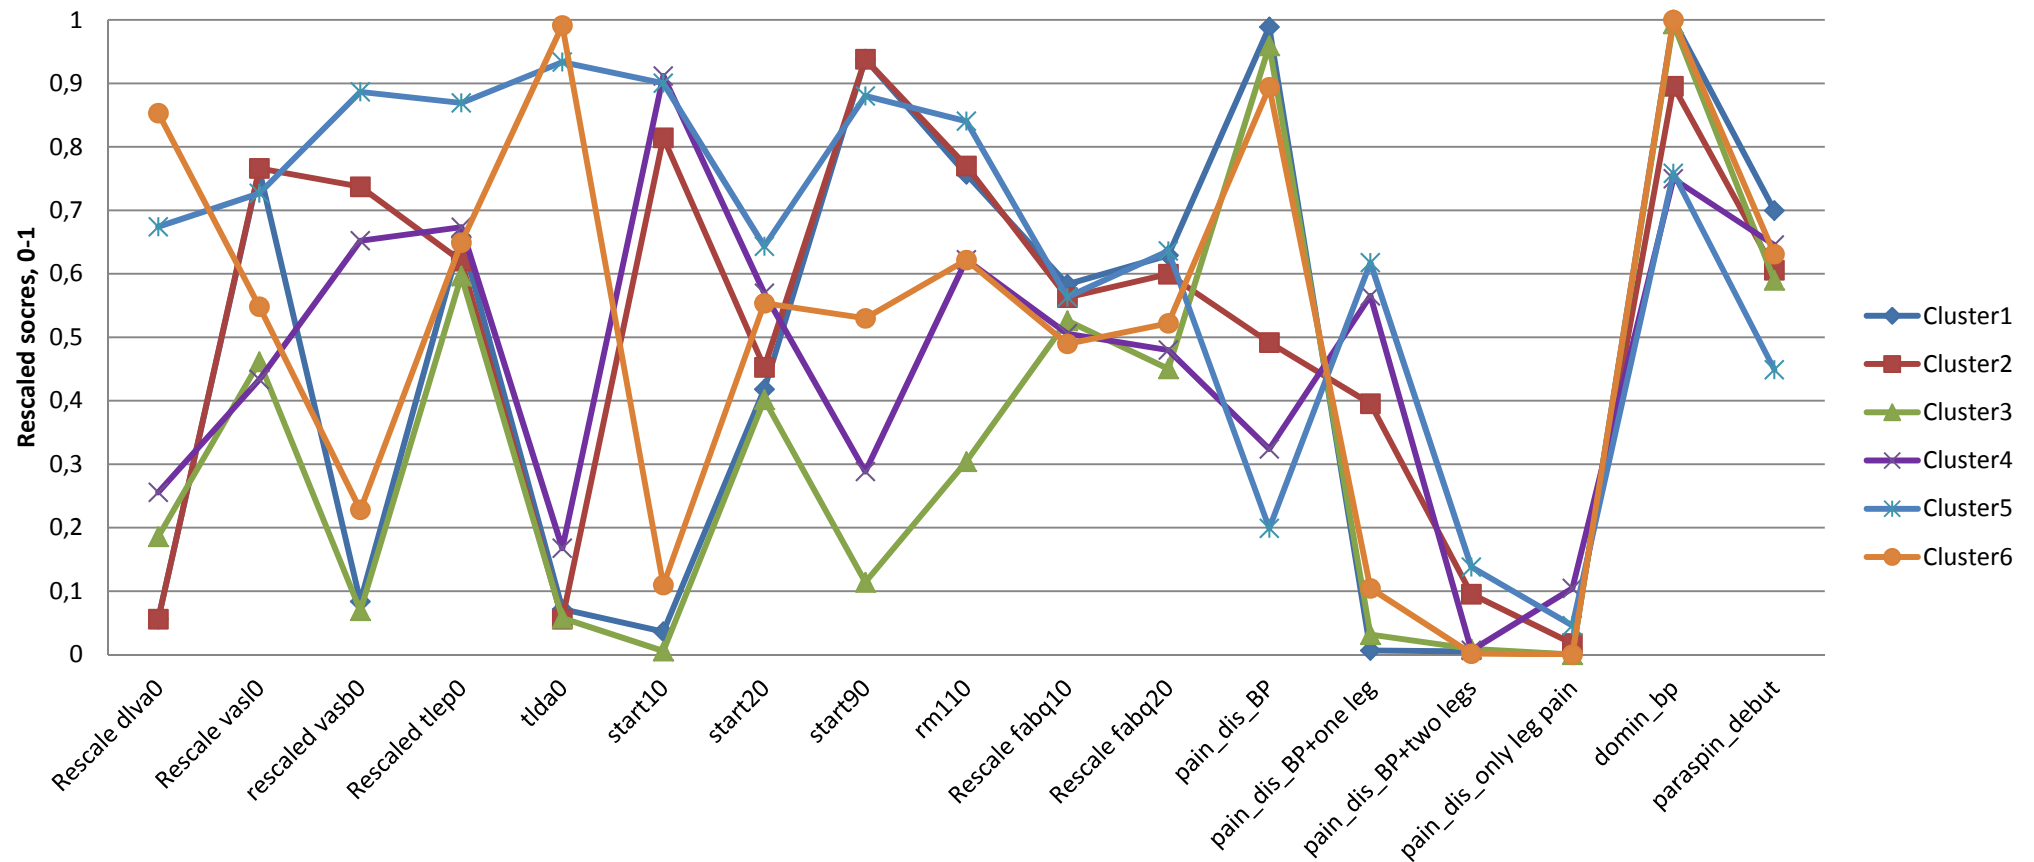

Cluster 1: Very short duration but high intensity BP

Cluster 2: Very short duration but high intensity BP and leg pain

Cluster 3: Short duration and low-moderate intensity BP

Cluster 4: Short duration and low-moderate intensity BP and high intensity leg pain

Cluster 5: Long duration and recurrent, high intensity BP and leg pain

Cluster 6: Very long duration and moderate intensity BP

# Pain domain v.2, single-item strategy, 7-domain profiles

Smallest cluster size = 4.39%

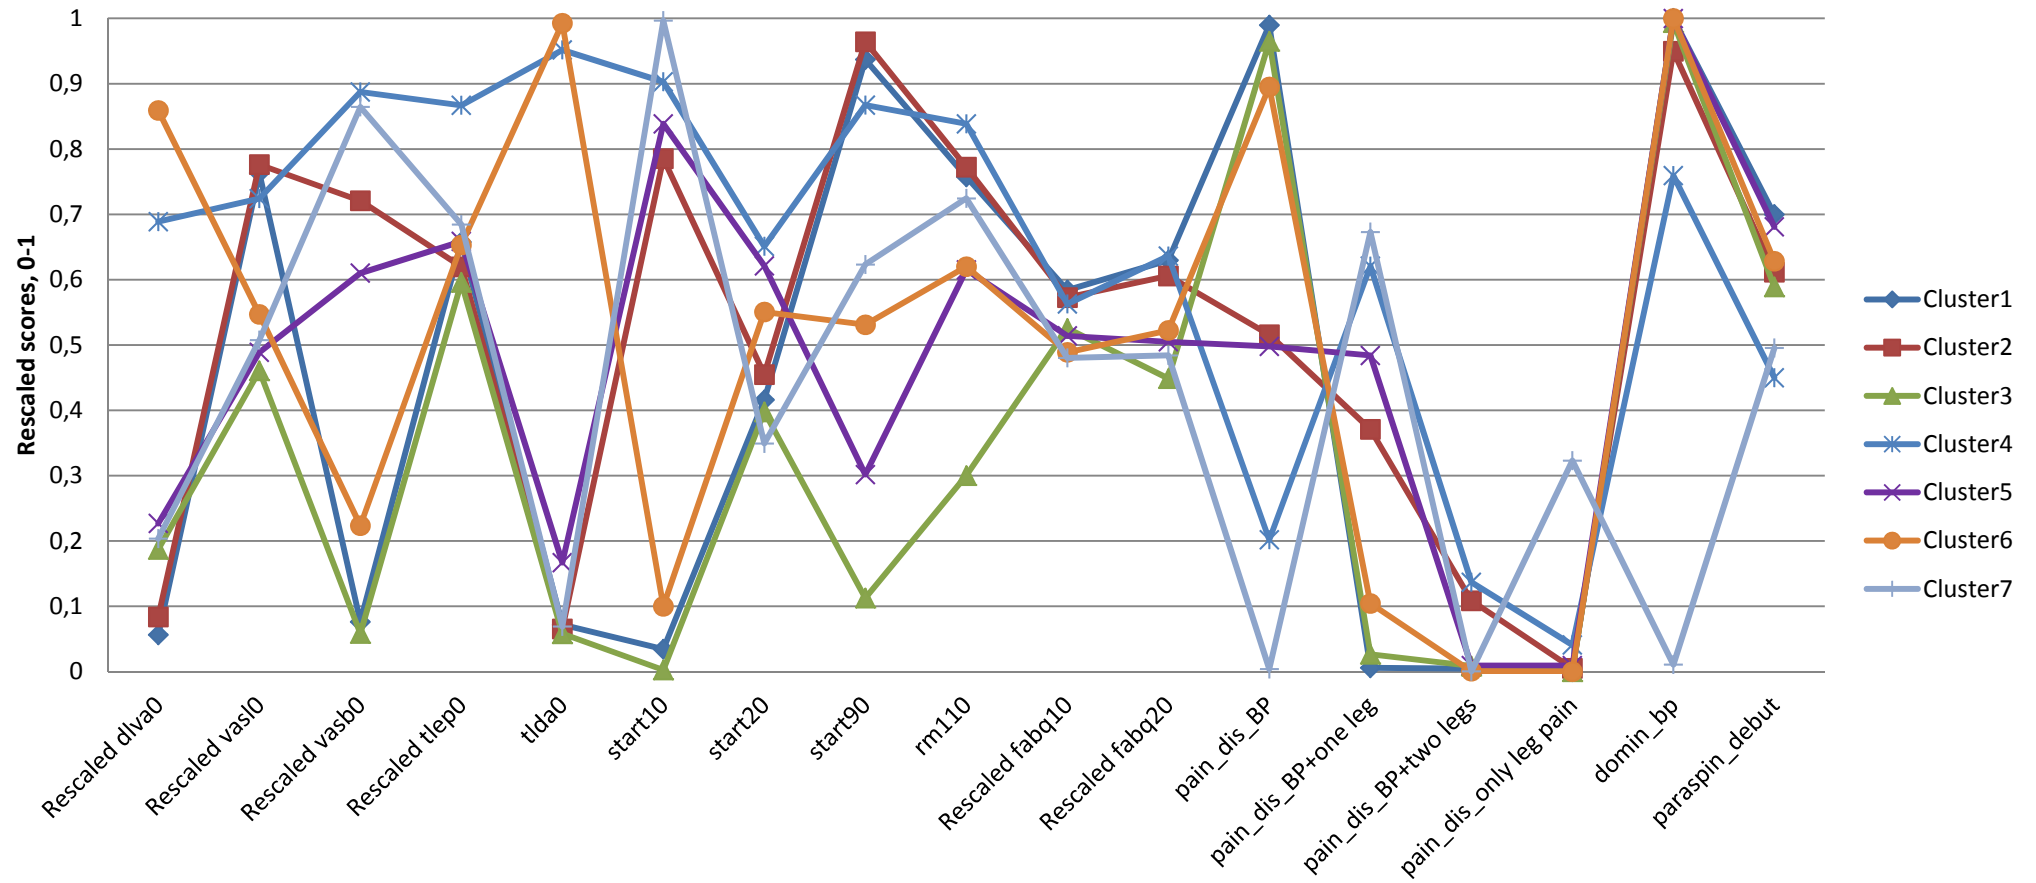



# Pain domain v.2, single-item strategy, 8-domain profiles

Smallest cluster size = 4.50%

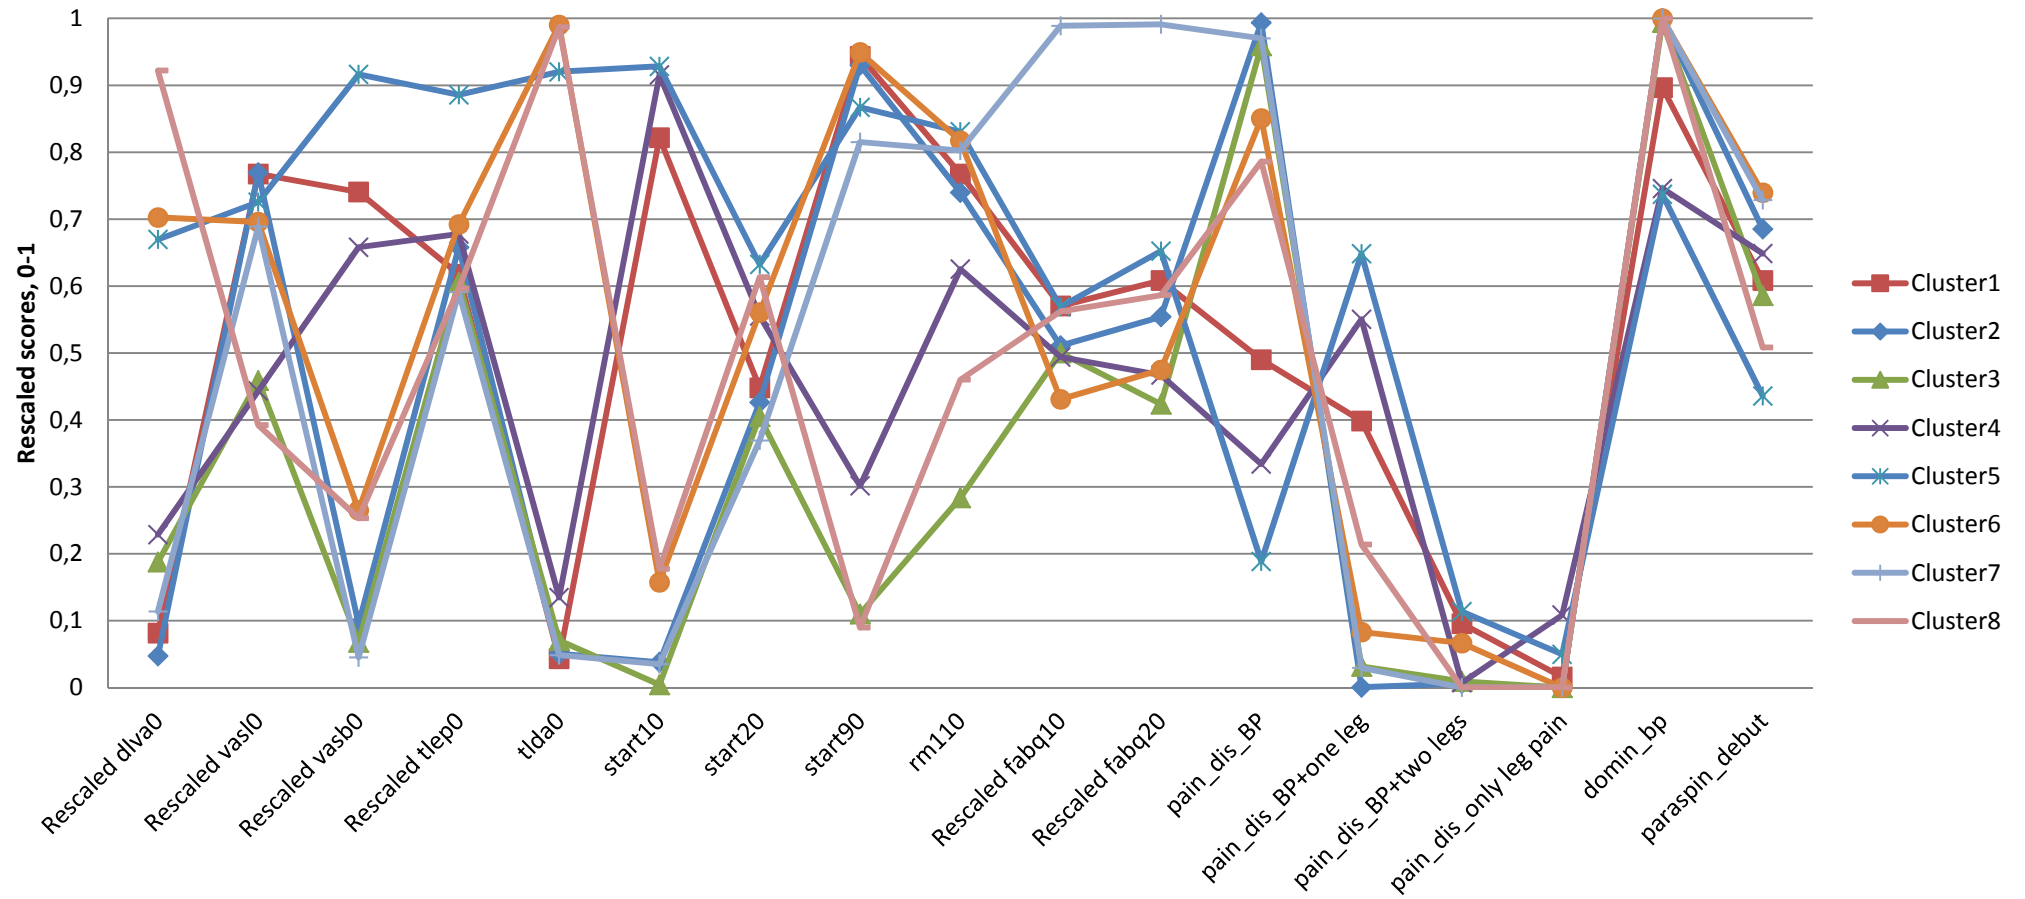

# Pain domain v. 2, single-item strategy, 9-domain profiles

Smallest cluster size = 4.12%

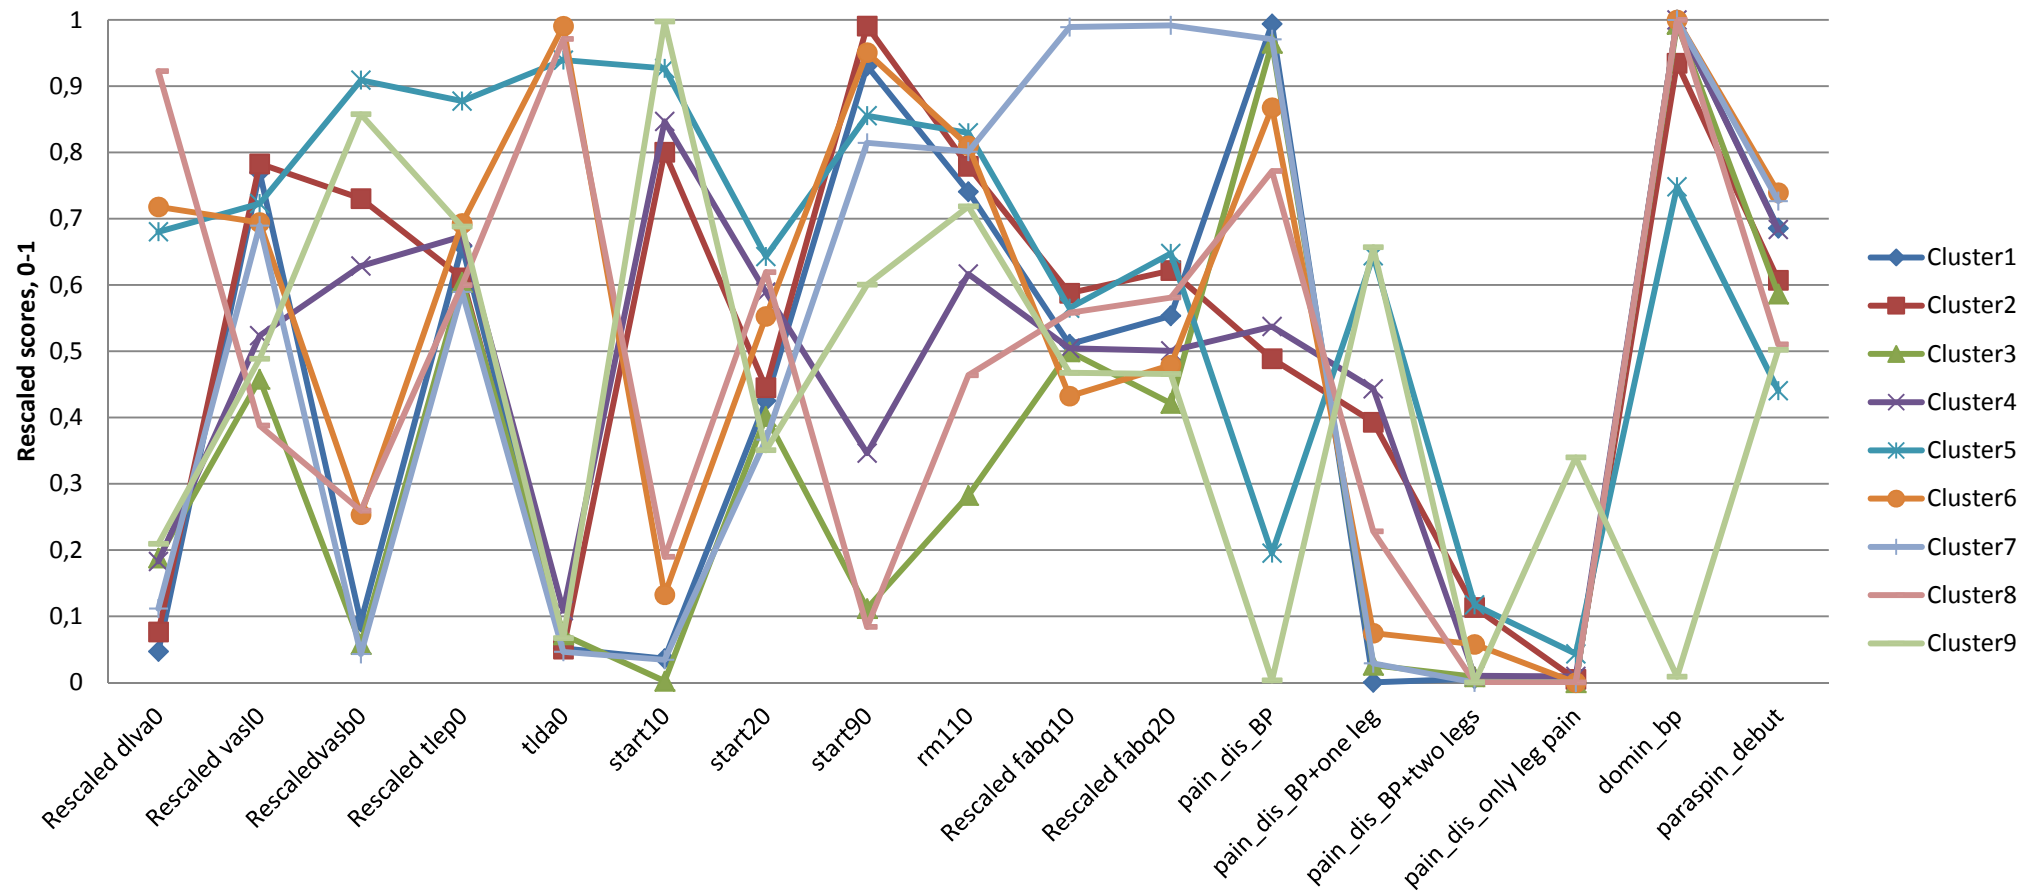

## Activity domain – single-item strategy

**Profile-plots:** Results (models) with 3 to 8 domain profiles based on the following variables:

|           |                                                                                                              |
|-----------|--------------------------------------------------------------------------------------------------------------|
| Start30   | I have only walked short distances because of my back pain (0=disagree, 1=agree)                             |
| Start40   | In the last 2 weeks, I have dressed more slowly than usual because of back pain (0=disagree, 1=agree)        |
| Rm20      | I change position frequently to try to get my back or leg comfortable (N/Y)                                  |
| Rm30      | I walk more slowly than usual because of my back problem or leg pain (sciatica) (N/Y)                        |
| Rm40      | Because of my back problem, I am not doing any of the jobs that I usually do around the house (N/Y)          |
| Rm50      | Because of my back problem, I use a handrail to get upstairs (N/Y)                                           |
| Rm60      | Because of my back problem, I have to hold on to something to get out of an easy chair (N/Y)                 |
| Rm70      | I get dressed more slowly than usual because of my back problem or leg pain (sciatica) (N/Y)                 |
| Rm80      | I only stand for short periods of time because of my back problem or leg pain (sciatica) (N/Y)               |
| Rm90      | Because of my back problem, I try not to bend or kneel down (N/Y)                                            |
| Rm100     | I find it difficult to get out of a chair because of my back problem or leg pain (sciatica) (N/Y)            |
| Rm120     | I find it difficult to turn over in bed because of my back problem or leg pain (sciatica) (N/Y)              |
| Rm130     | I have trouble putting on my socks (or stockings) because of the pain in my back or leg (N/Y)                |
| Rm140     | I only walk short distances because of my back problem or leg pain (sciatica) (N/Y)                          |
| Rm160     | I avoid heavy jobs around the house because of my back problem (N/Y)                                         |
| Rm180     | Because of my back problem, I go upstairs more slowly than usual (N/Y)                                       |
| Rm190     | I stay in bed most of the time because of my back or leg pain (sciatica) (N/Y)                               |
| Rm220     | Because of my back problem, I am doing less of the daily work around the house than I would usually do (N/Y) |
| Fabq50    | I cannot do physical activities which (might) make my pain worse (0=disagree, 3=don't know, 6=agree)         |
| Fabq130   | I cannot do my normal work with my present pain (0=disagree, 1=don't know, 2=agree)                          |
| facetsit  | Best posture is to sit (N/Y)                                                                                 |
| facetwalk | Best posture is to walk (N/Y)                                                                                |

**BREAK...**

**To be able to view full models within the activity domain**

### Activity domain, single-item strategy, 3-domain profiles

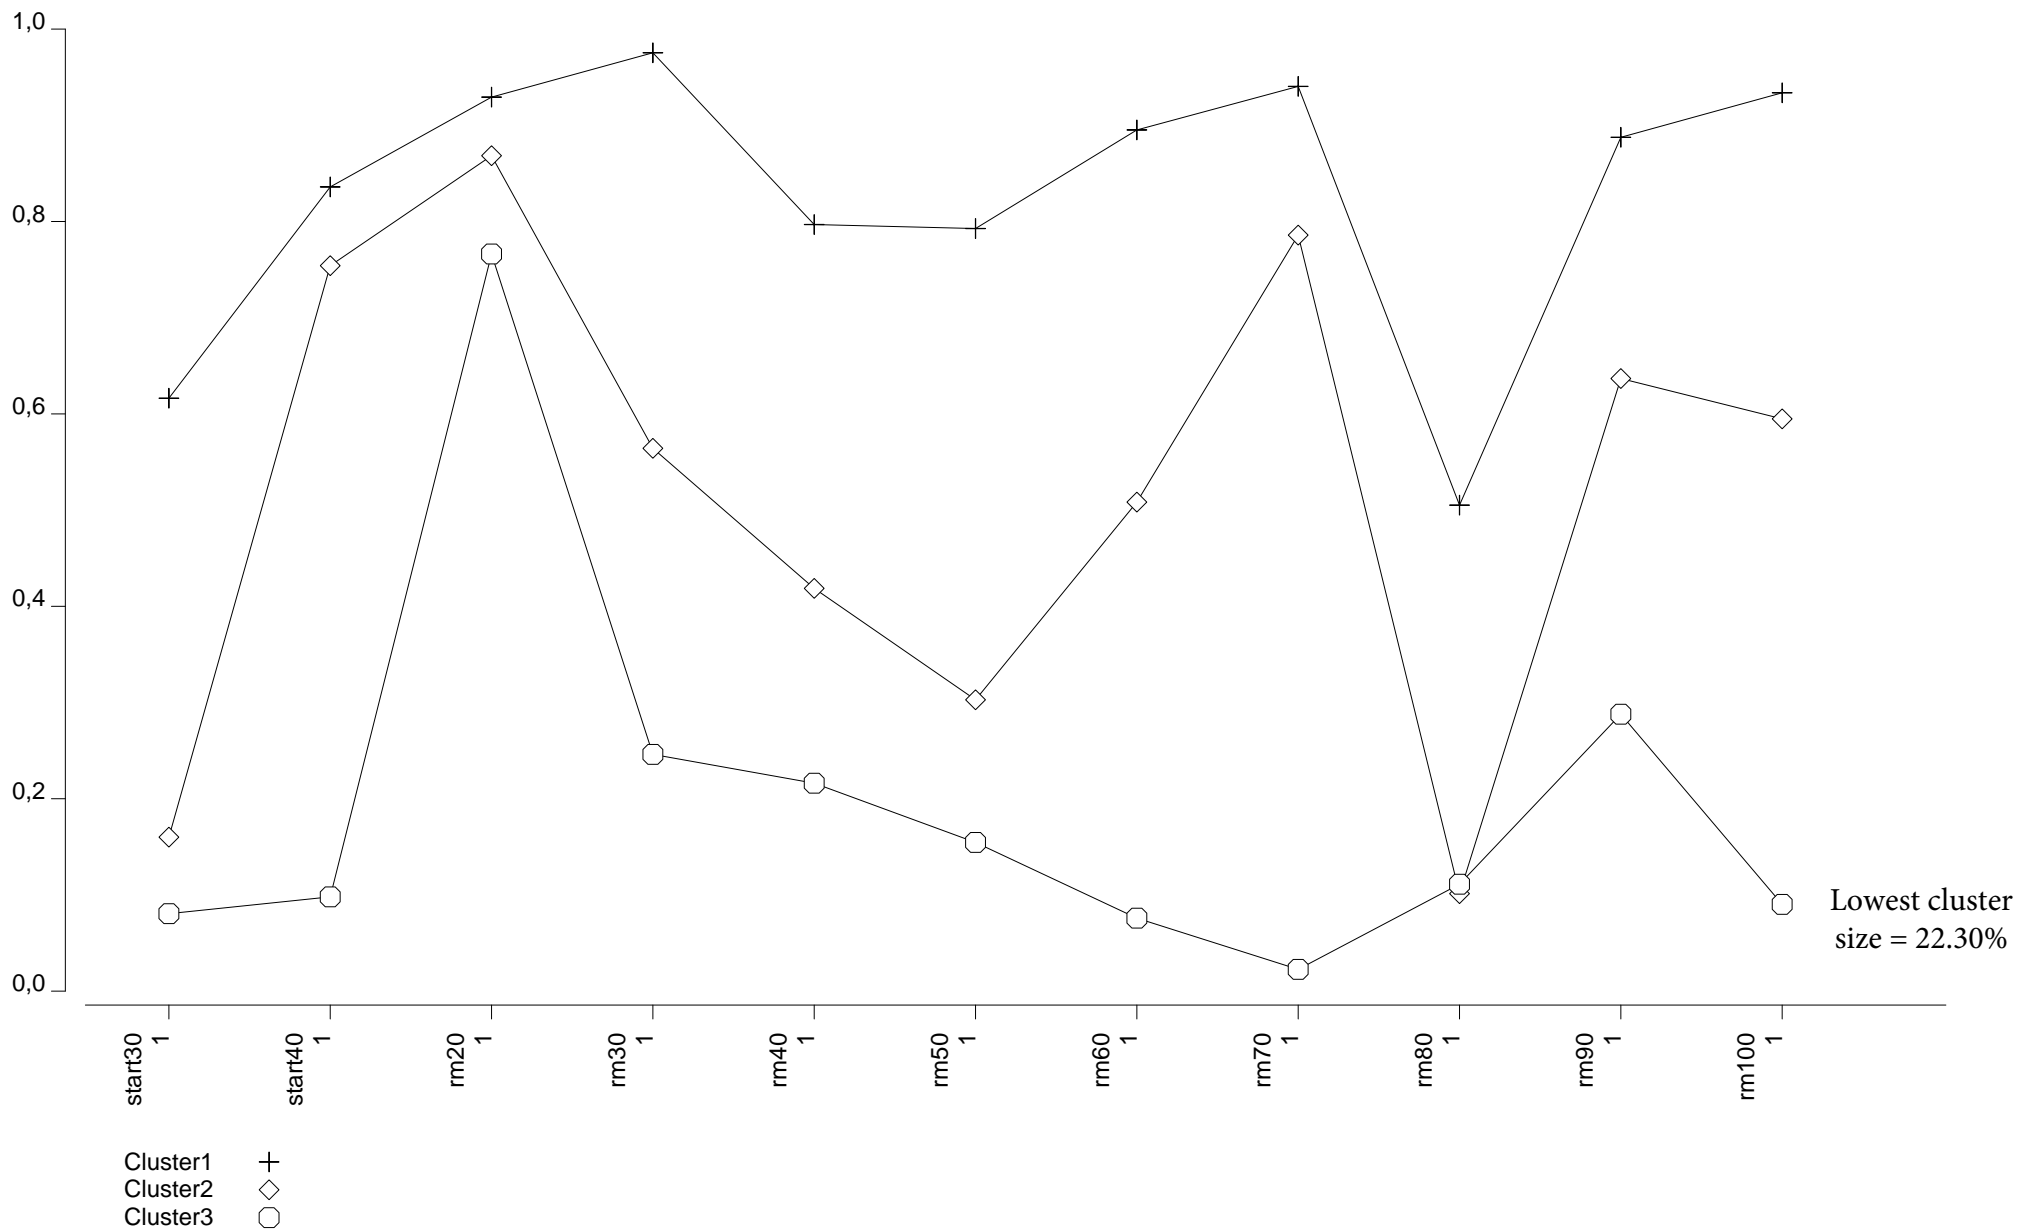

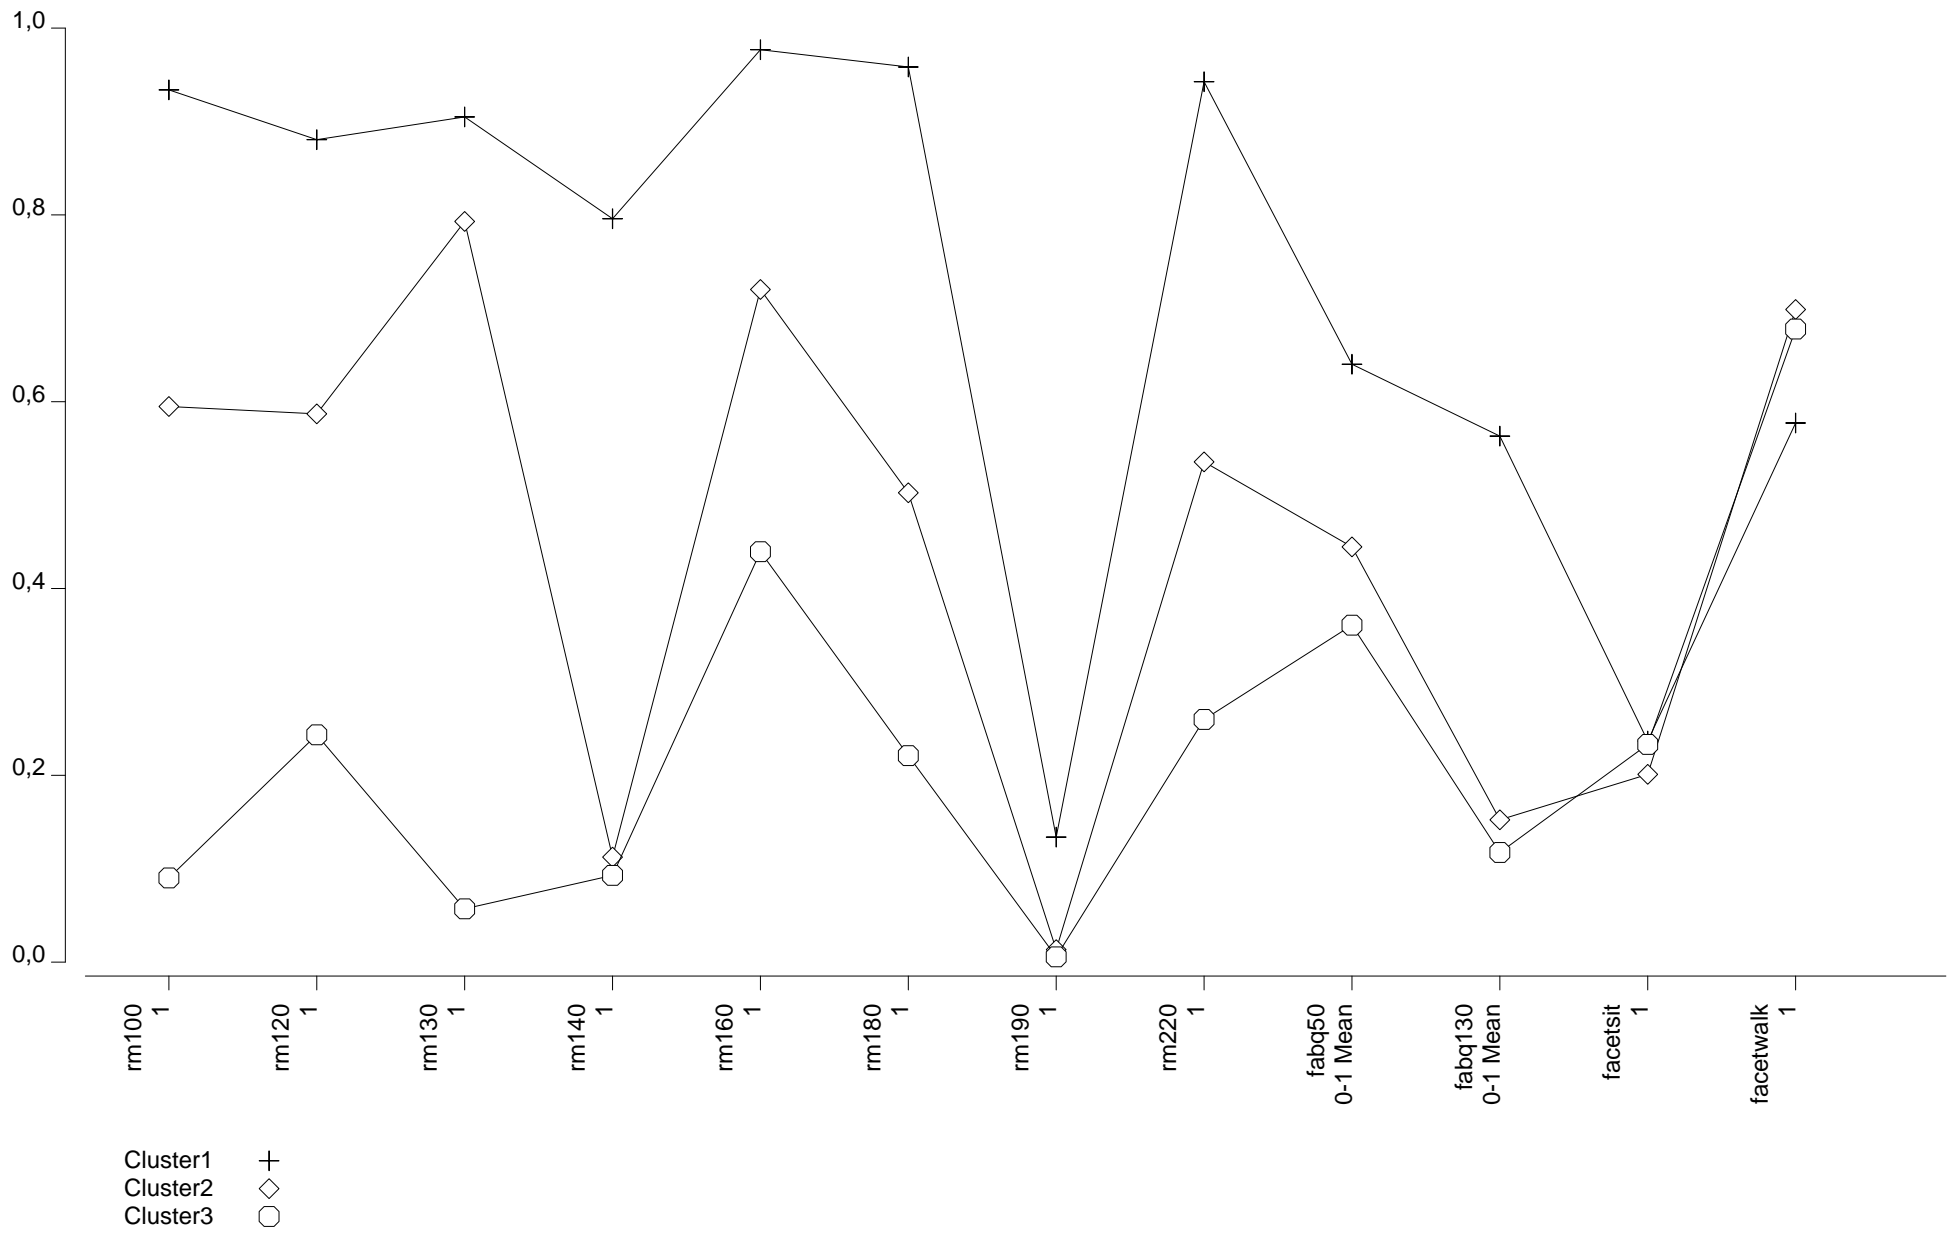

### Activity domain, single-item strategy, 4-domain profiles

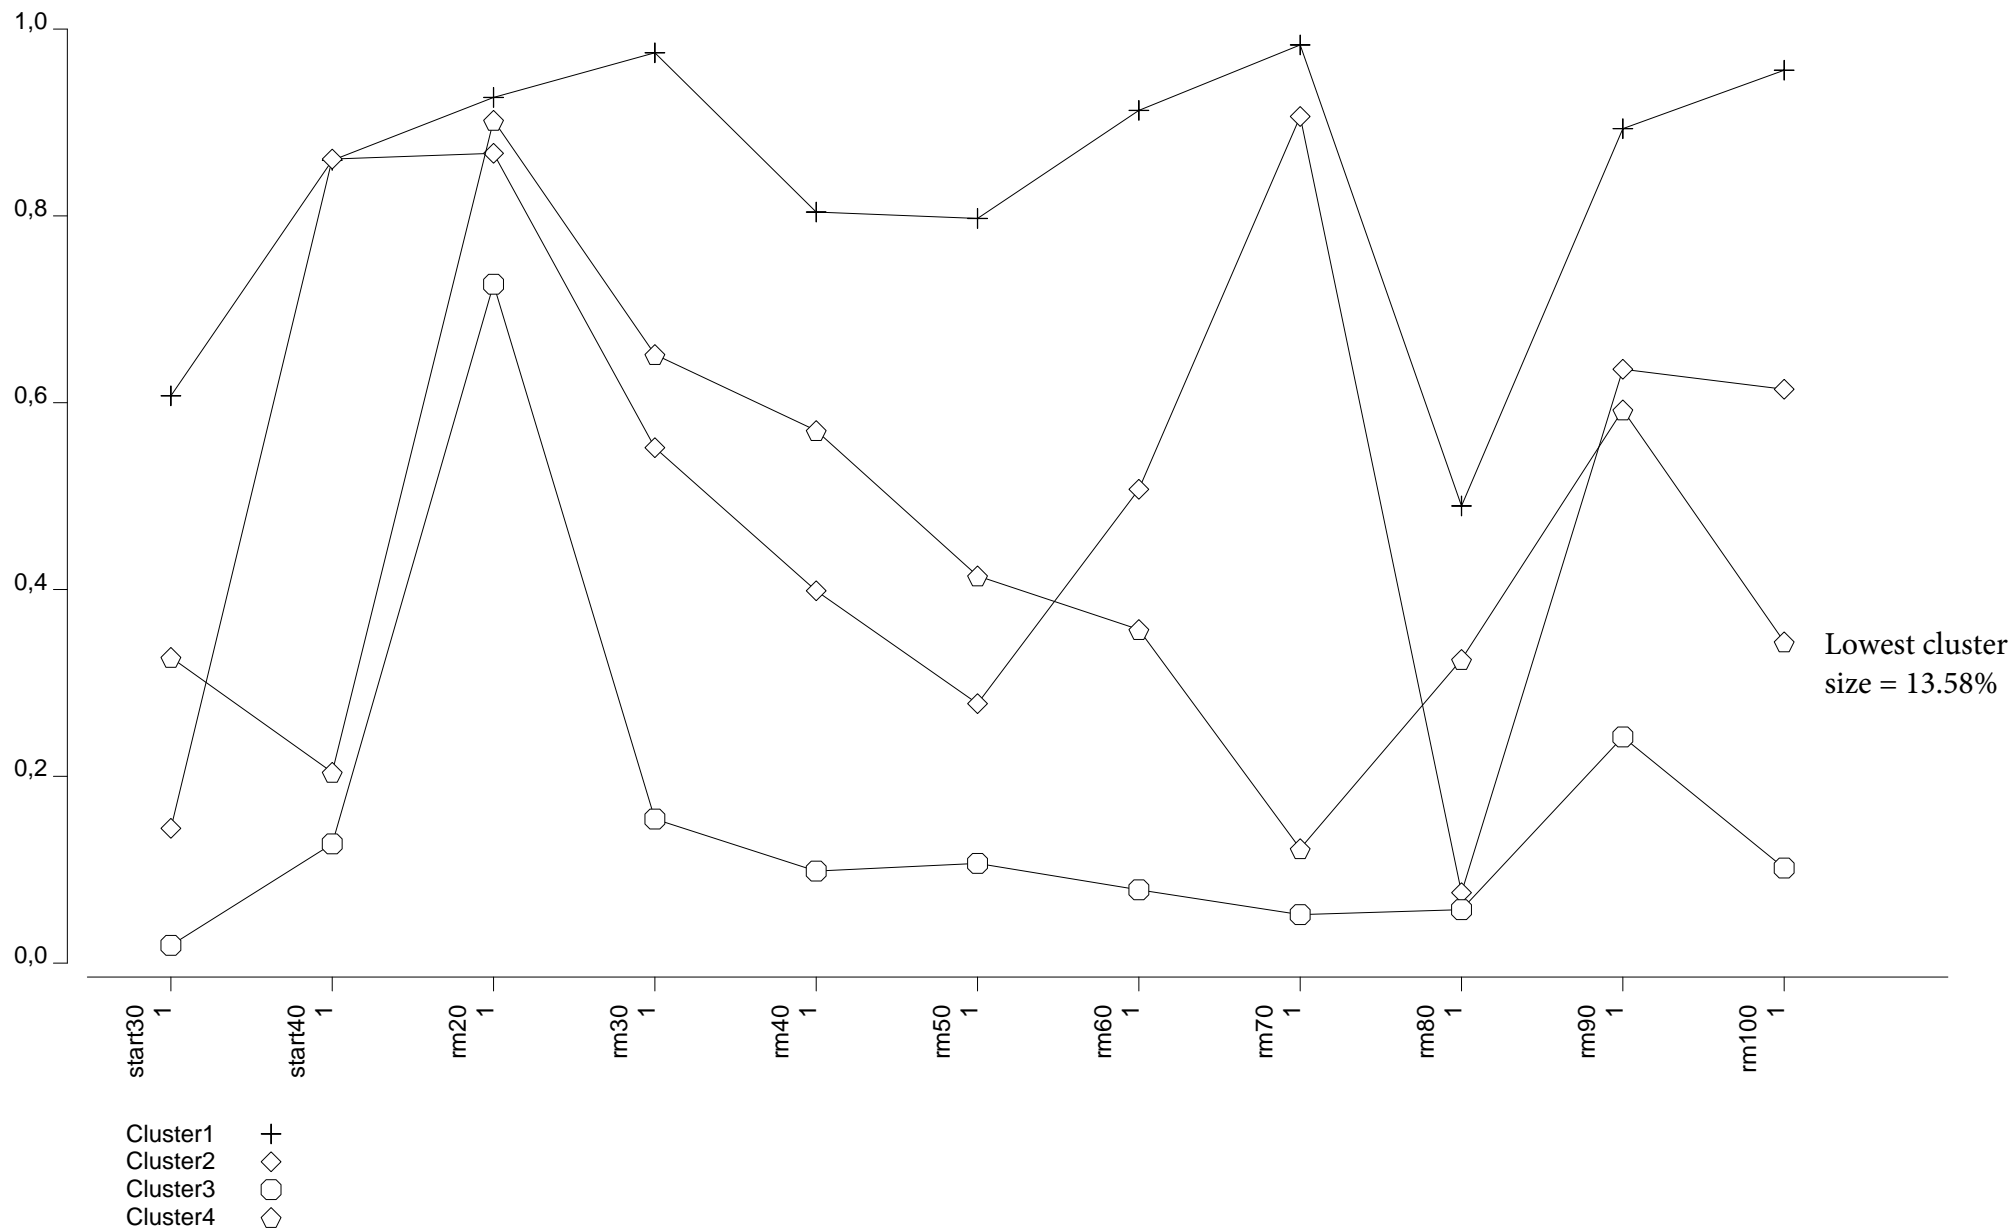

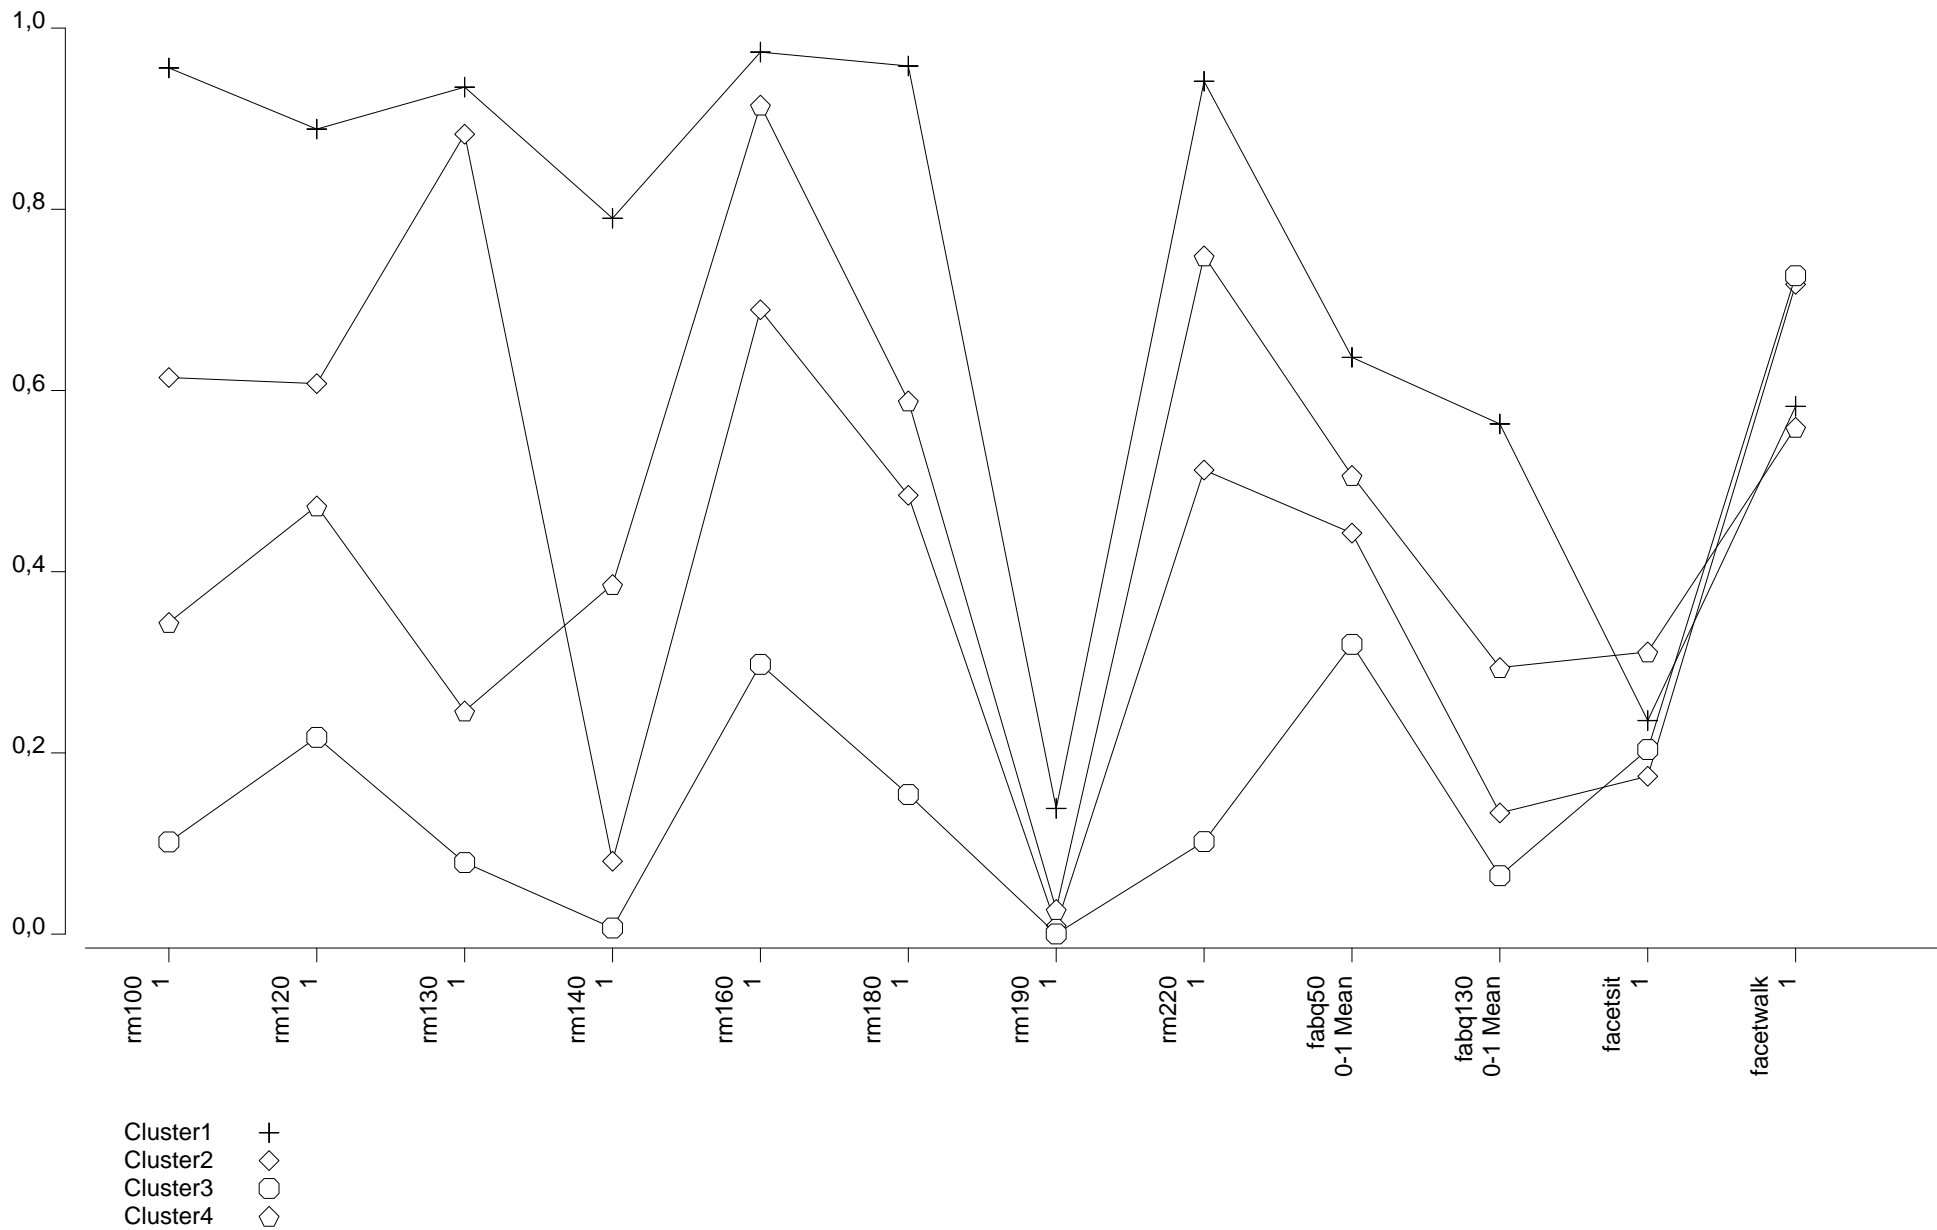



# Activity domain, single-item, 5-domain profiles

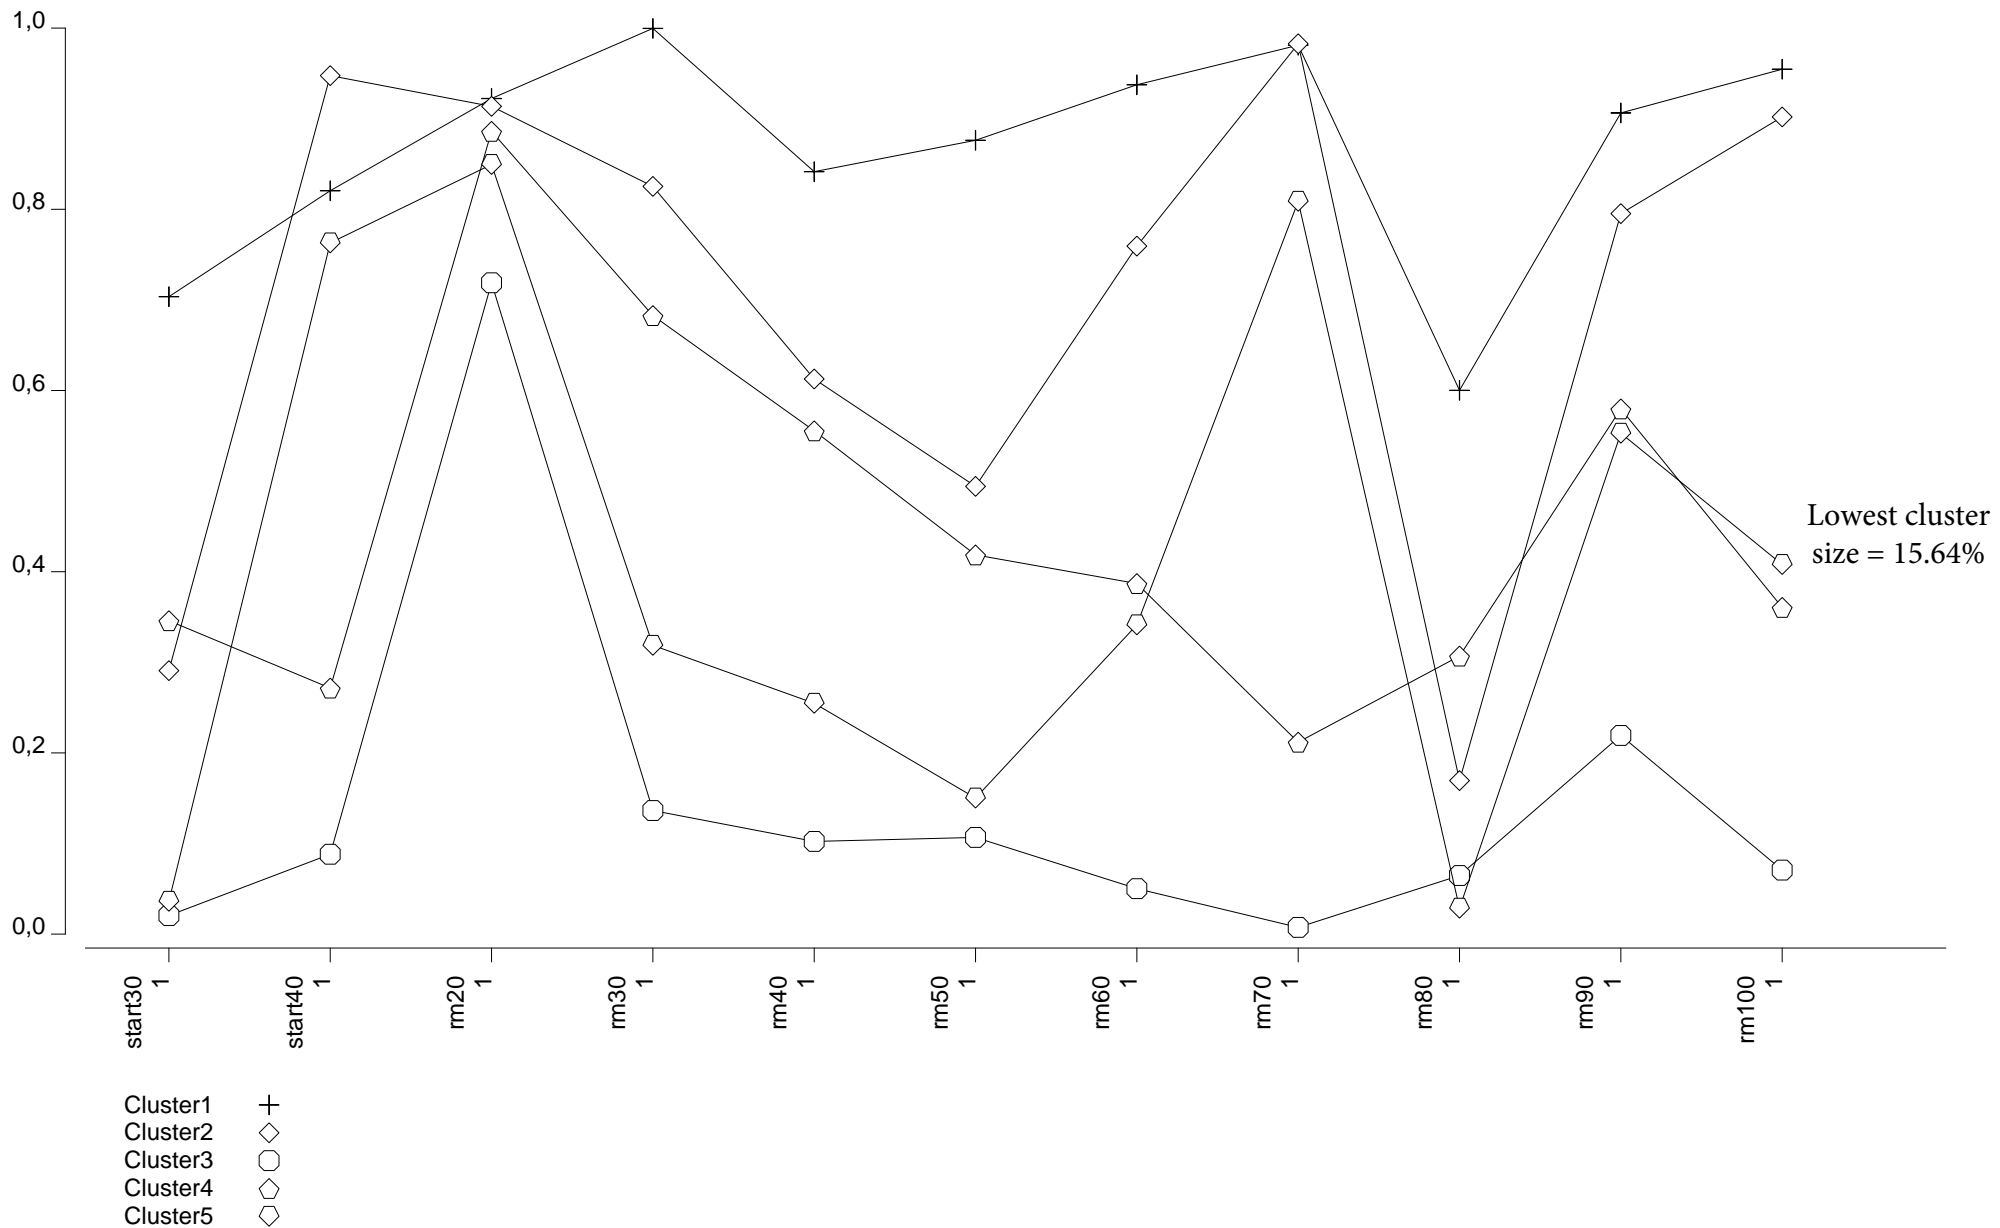

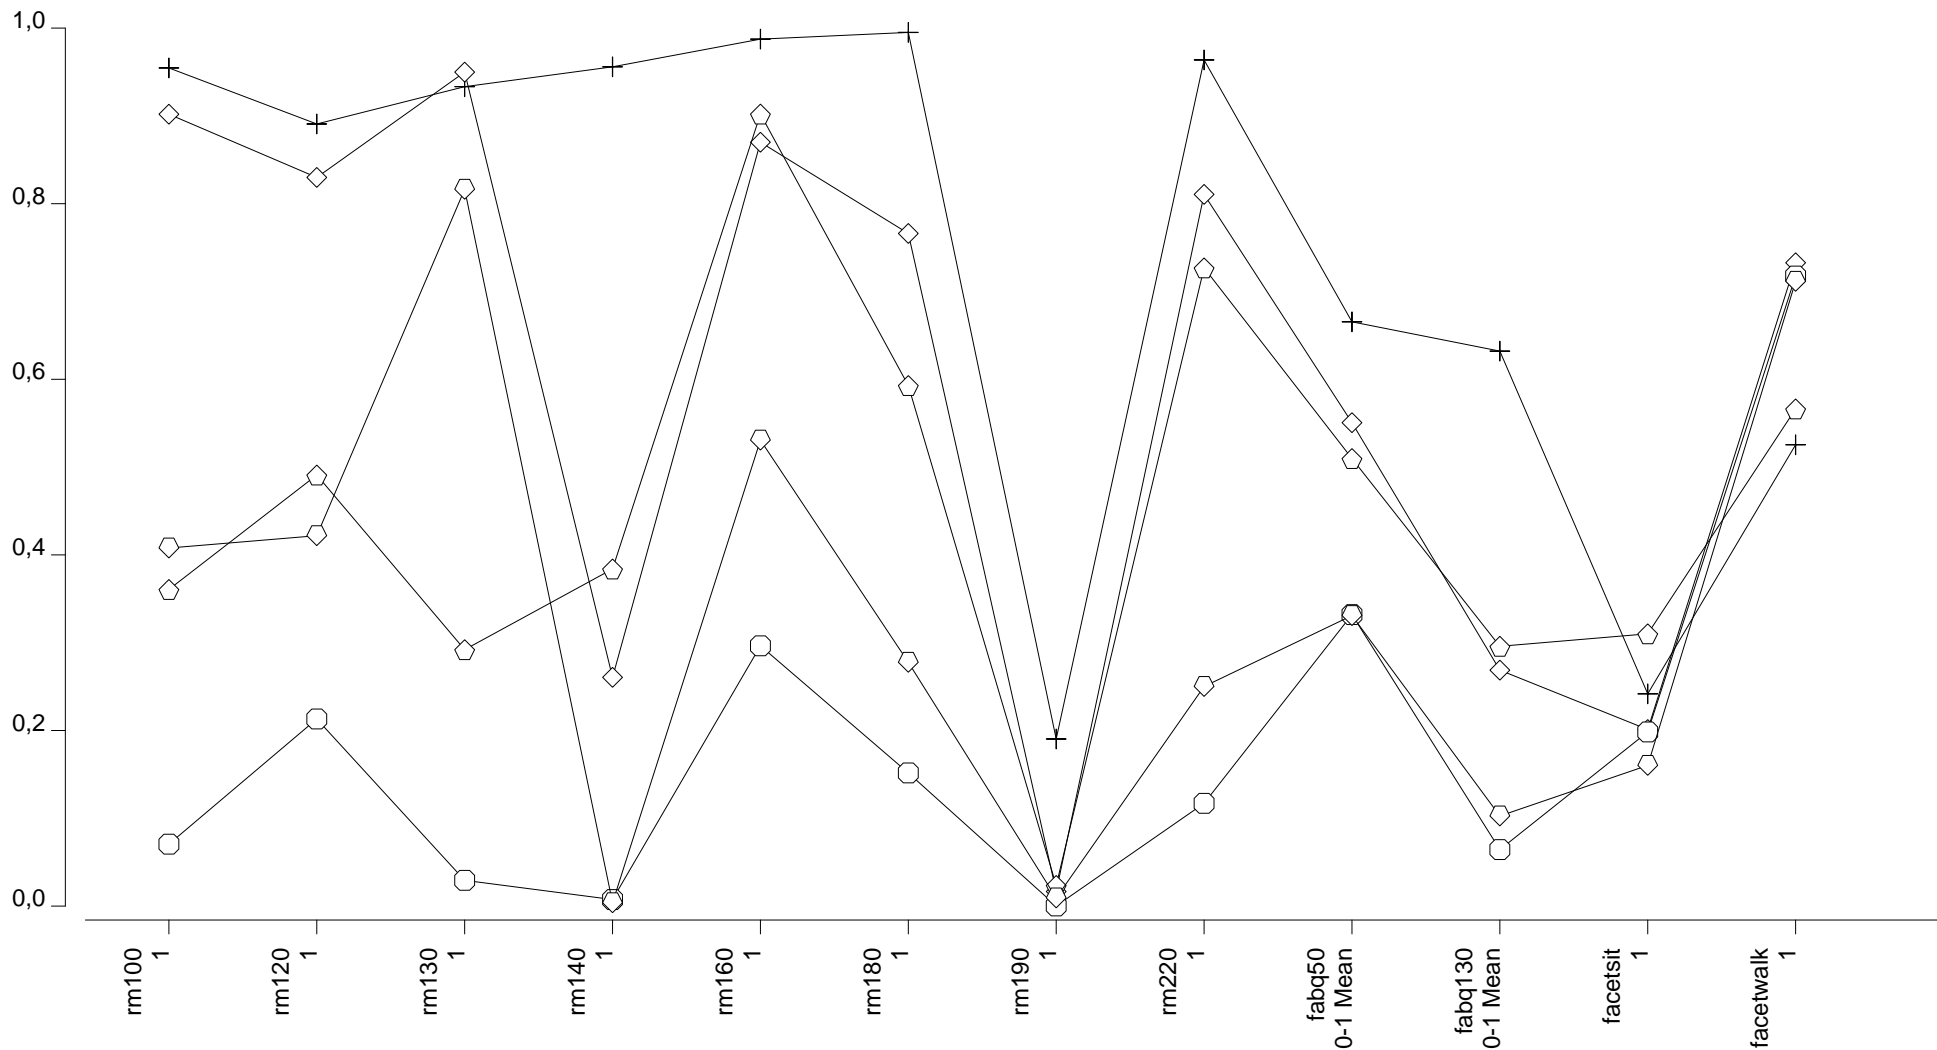

Cluster1 +  
 Cluster2 ◇  
 Cluster3 ○  
 Cluster4 ◇  
 Cluster5 ◇

# Activity domain, single-item strategy, 6-domain profiles

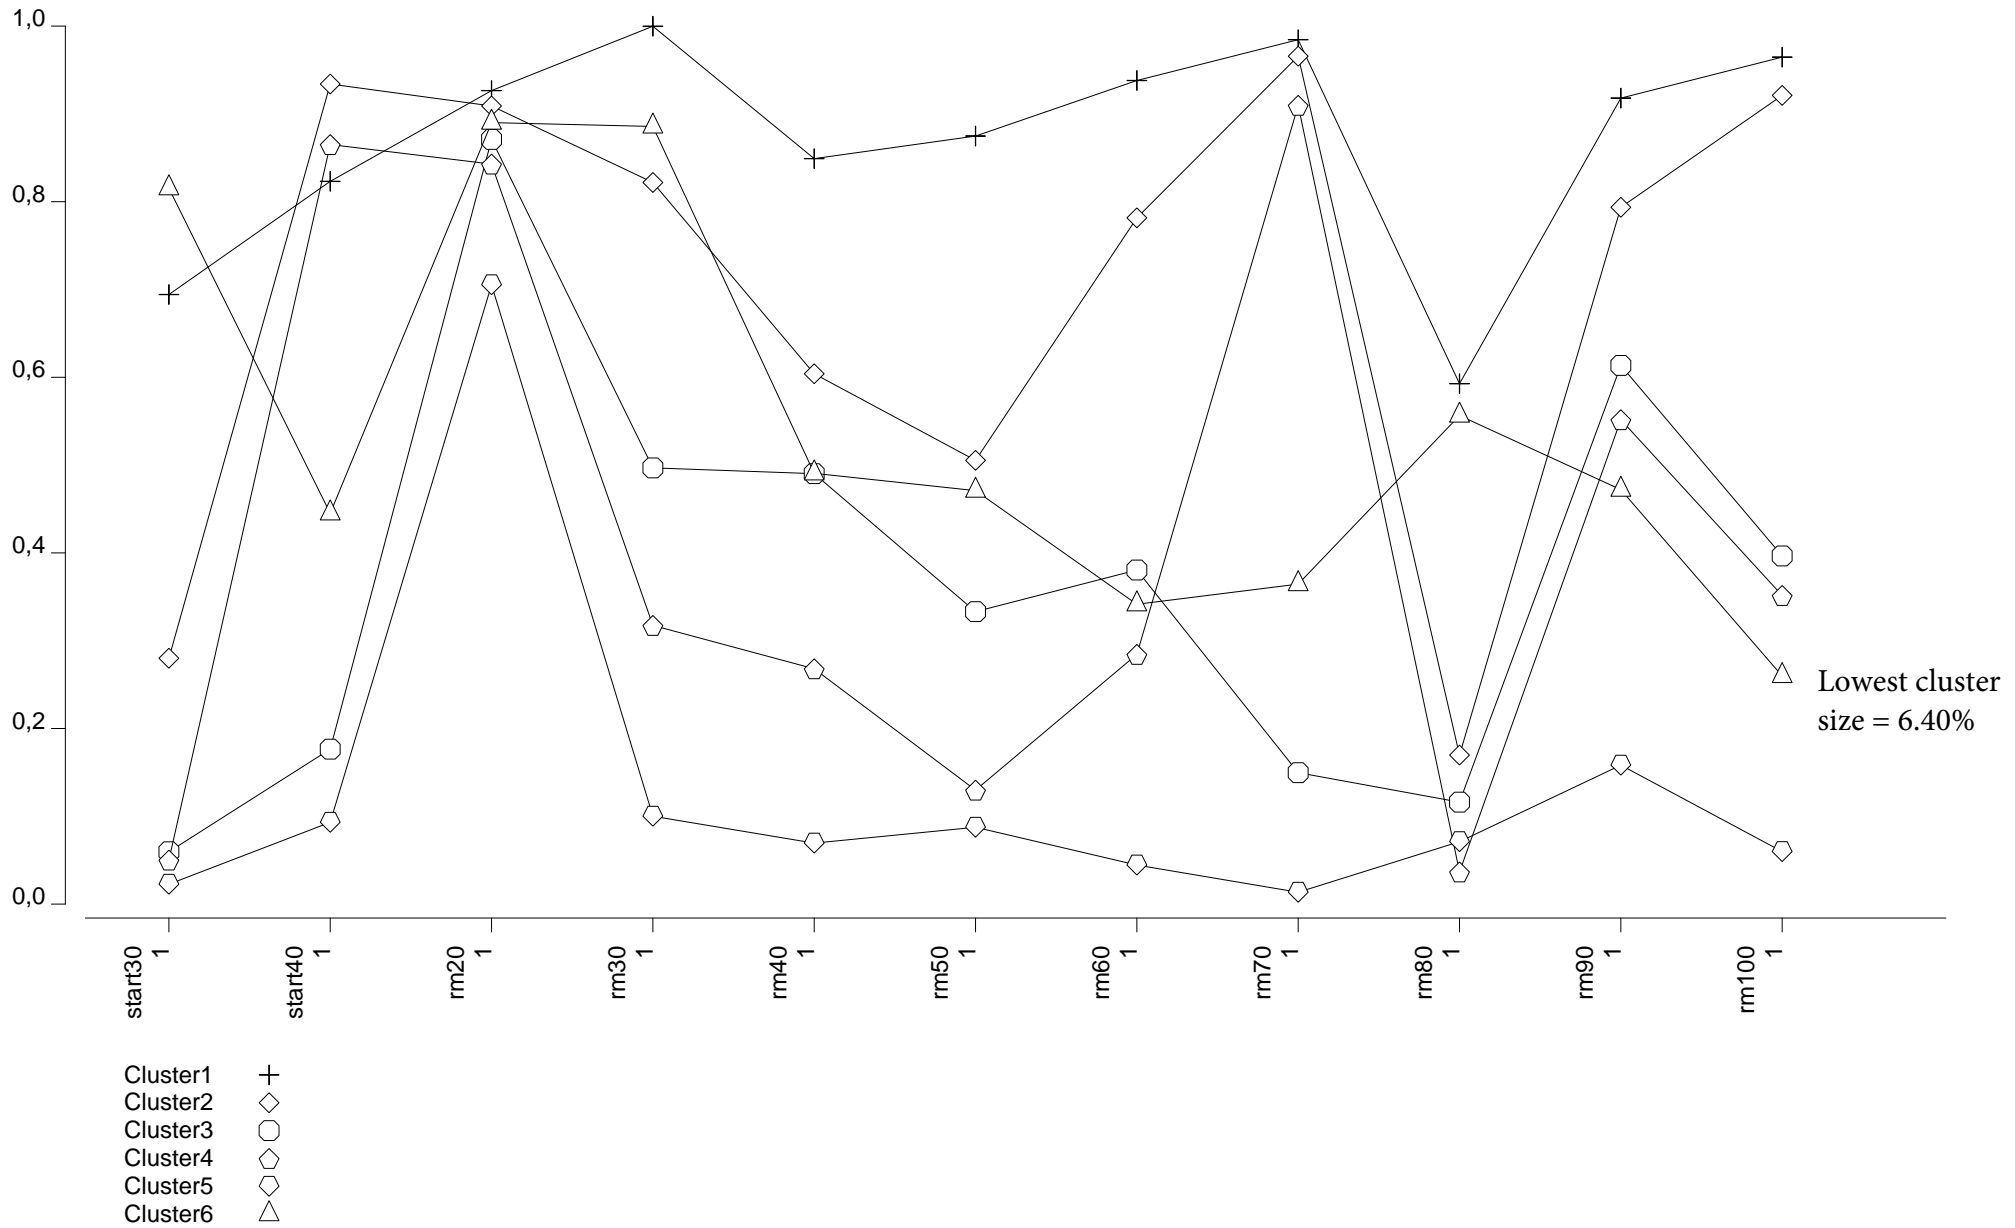

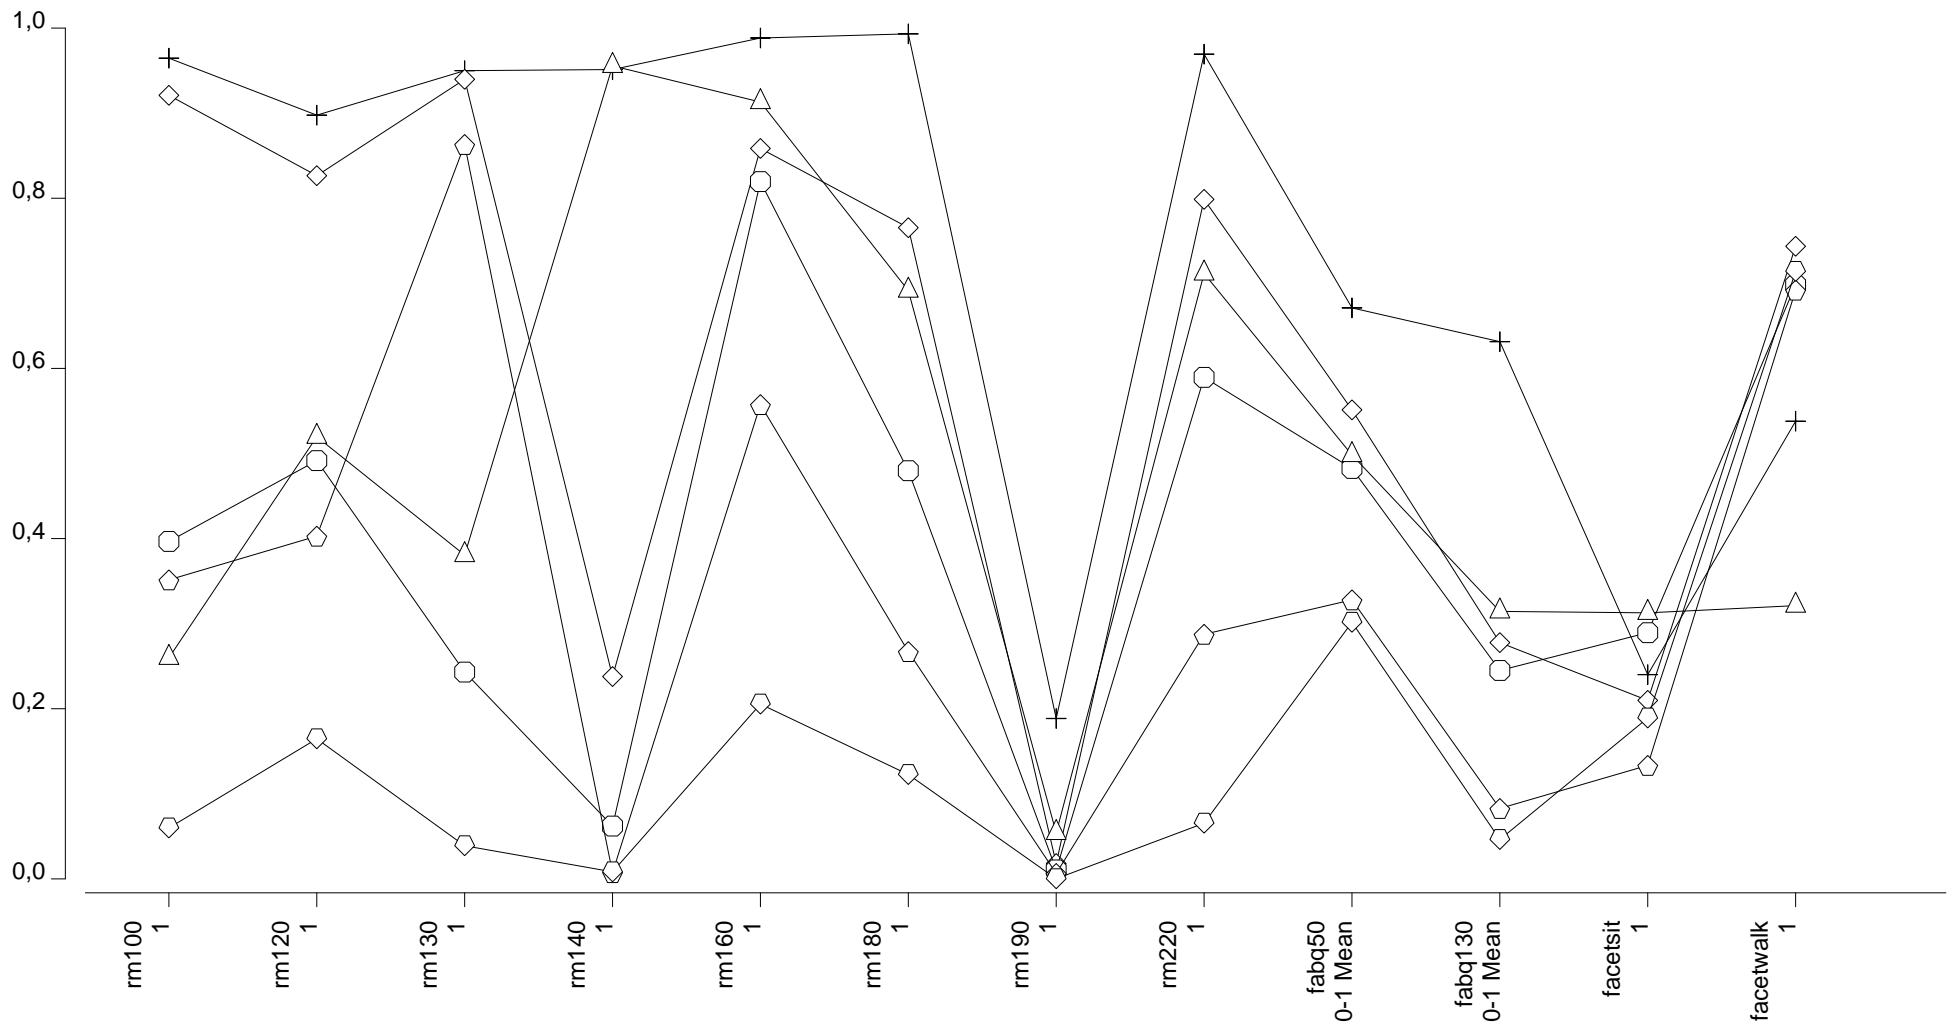

- Cluster1 +
- Cluster2 ◇
- Cluster3 ○
- Cluster4 ◇
- Cluster5 ◇
- Cluster6 △

# Activity domain, single-item strategy, 7-domain profiles

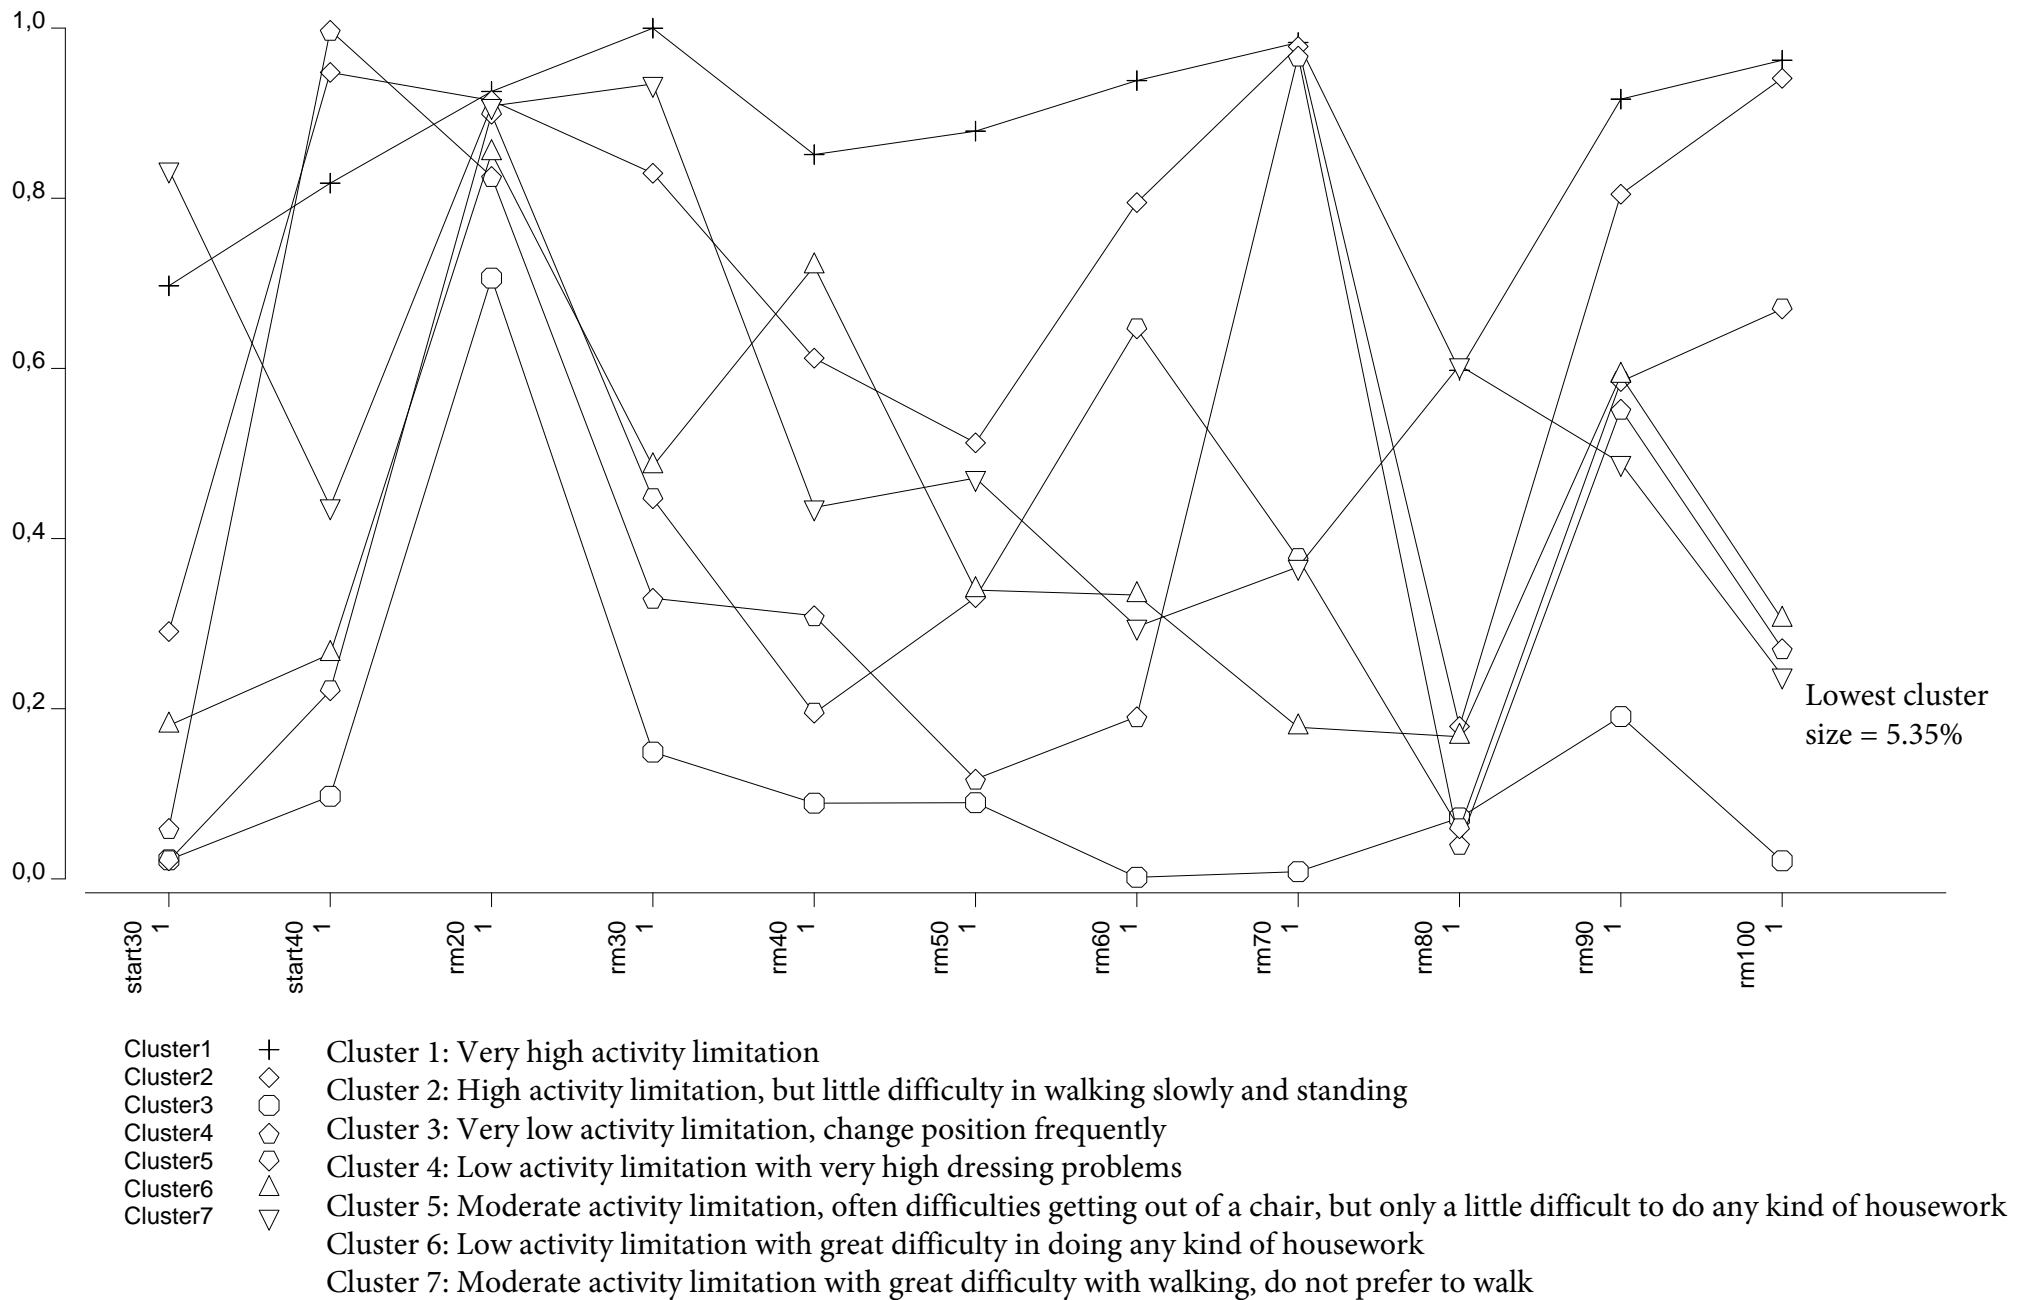

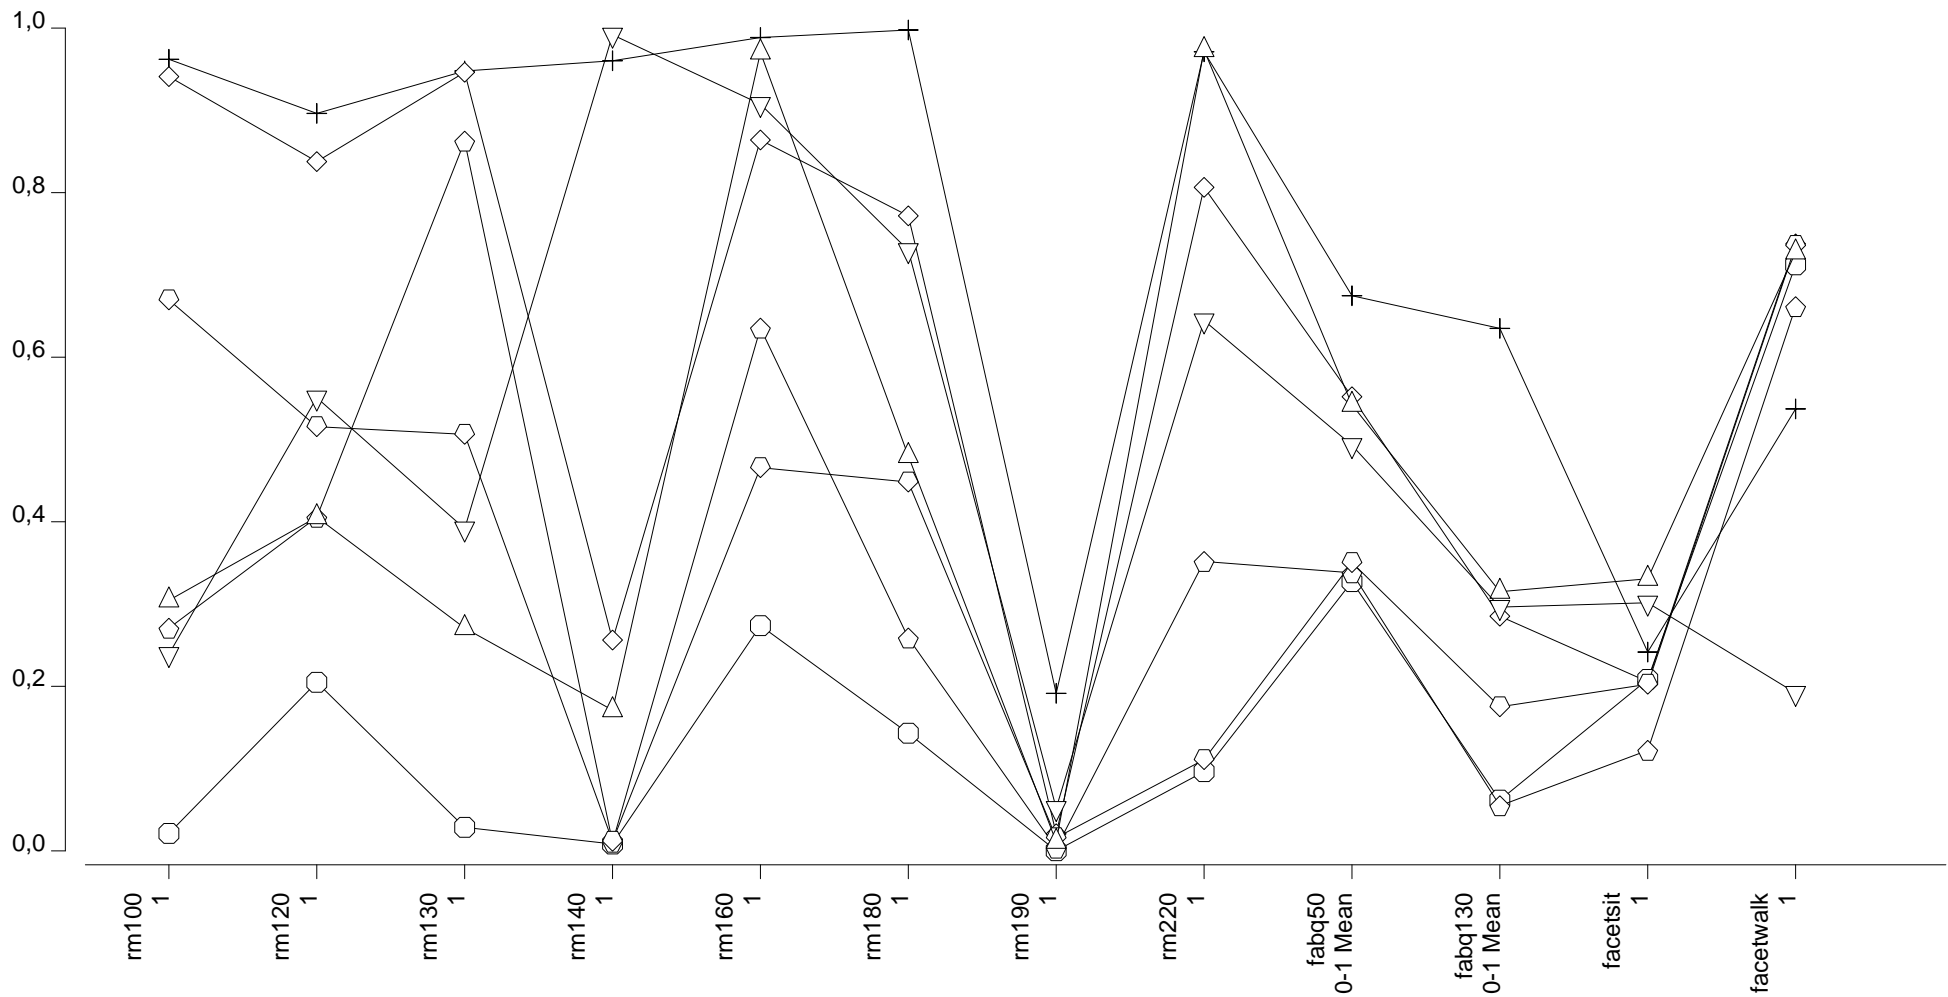

- Cluster1 +
- Cluster2 ◇
- Cluster3 ○
- Cluster4 ◊
- Cluster5 ◈
- Cluster6 △
- Cluster7 ▽

# Activity domain, single-item strategy, 8-domain profiles

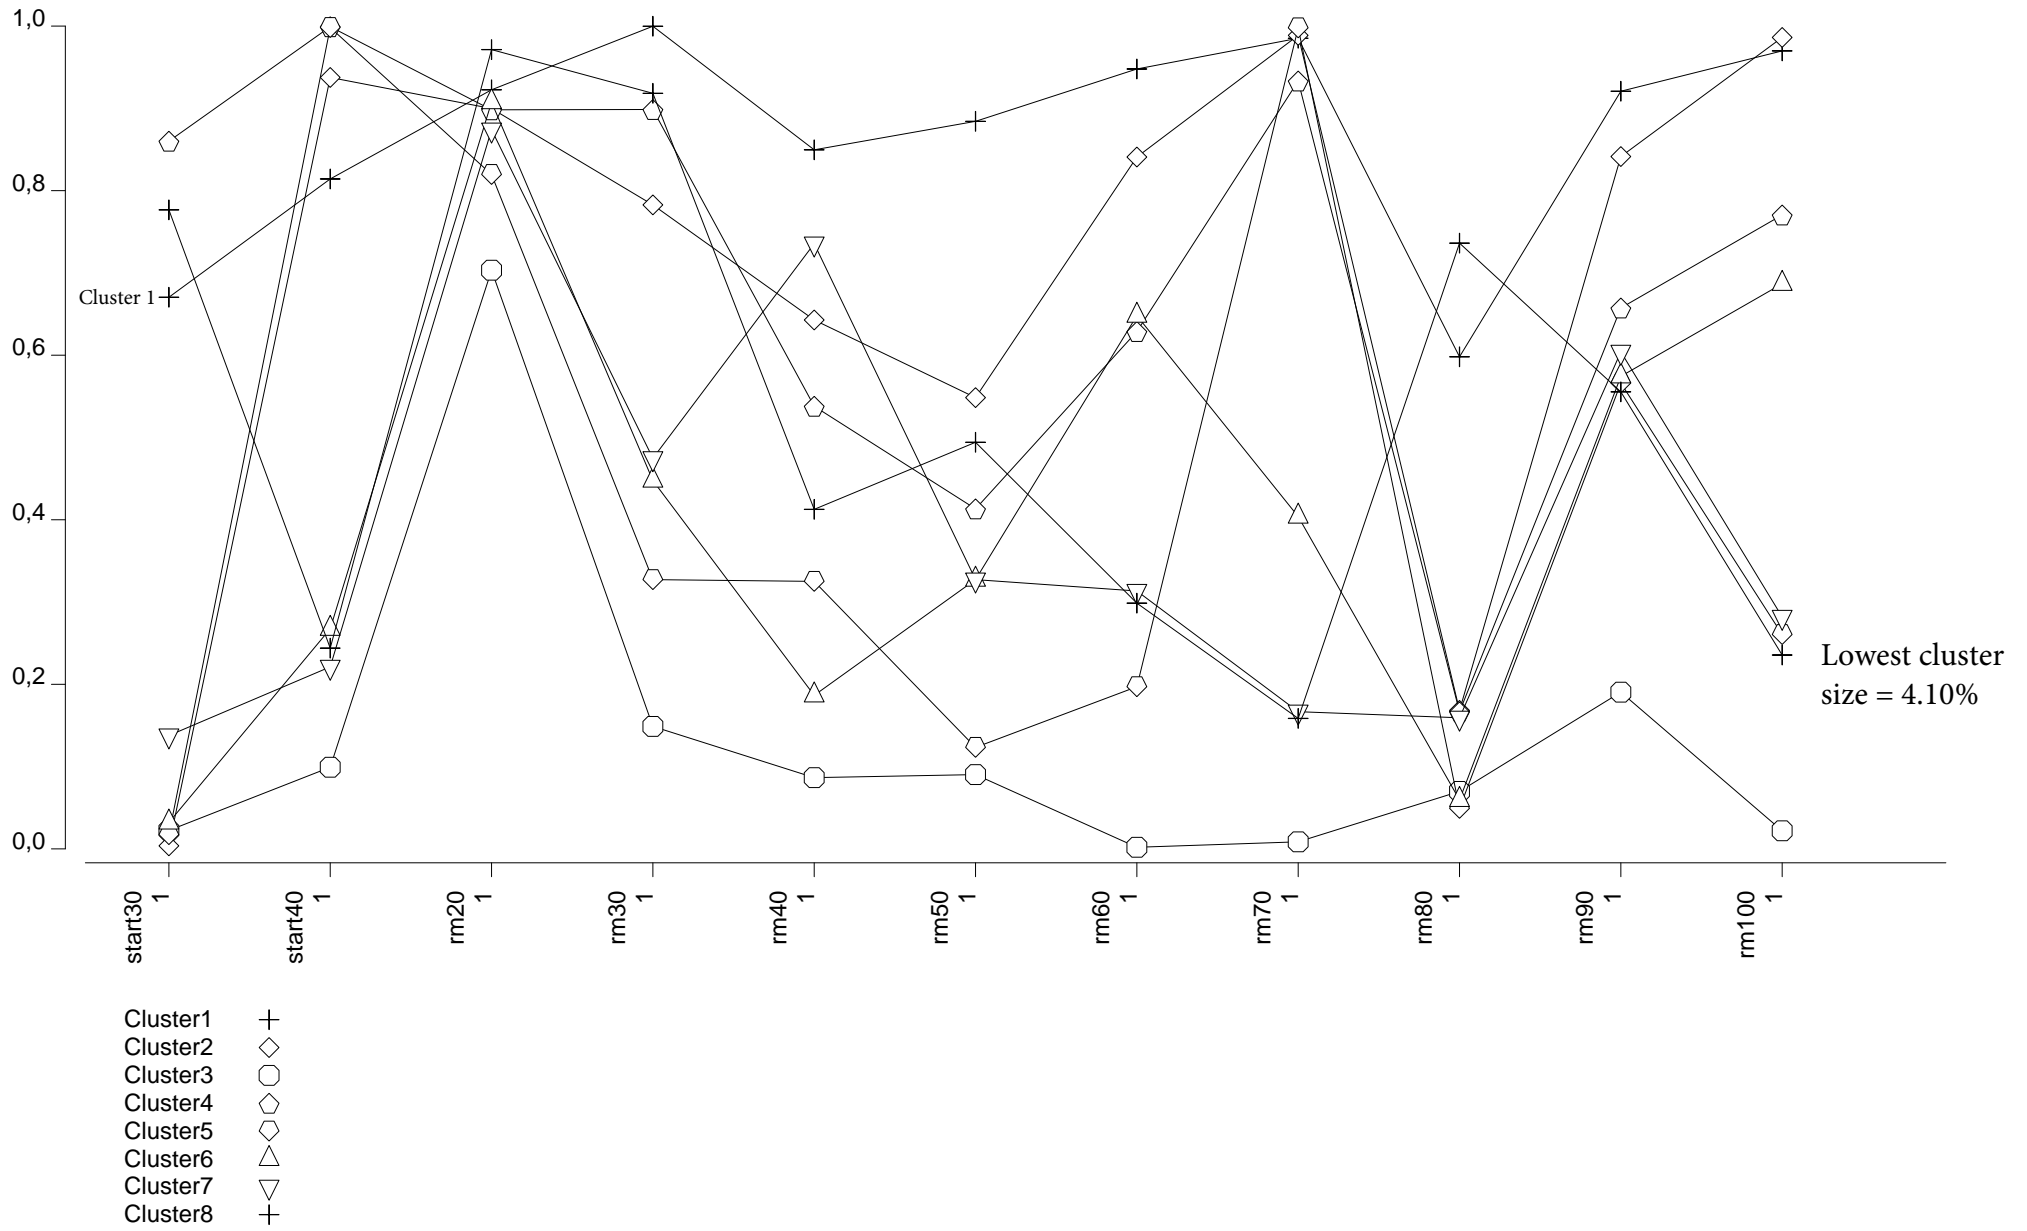

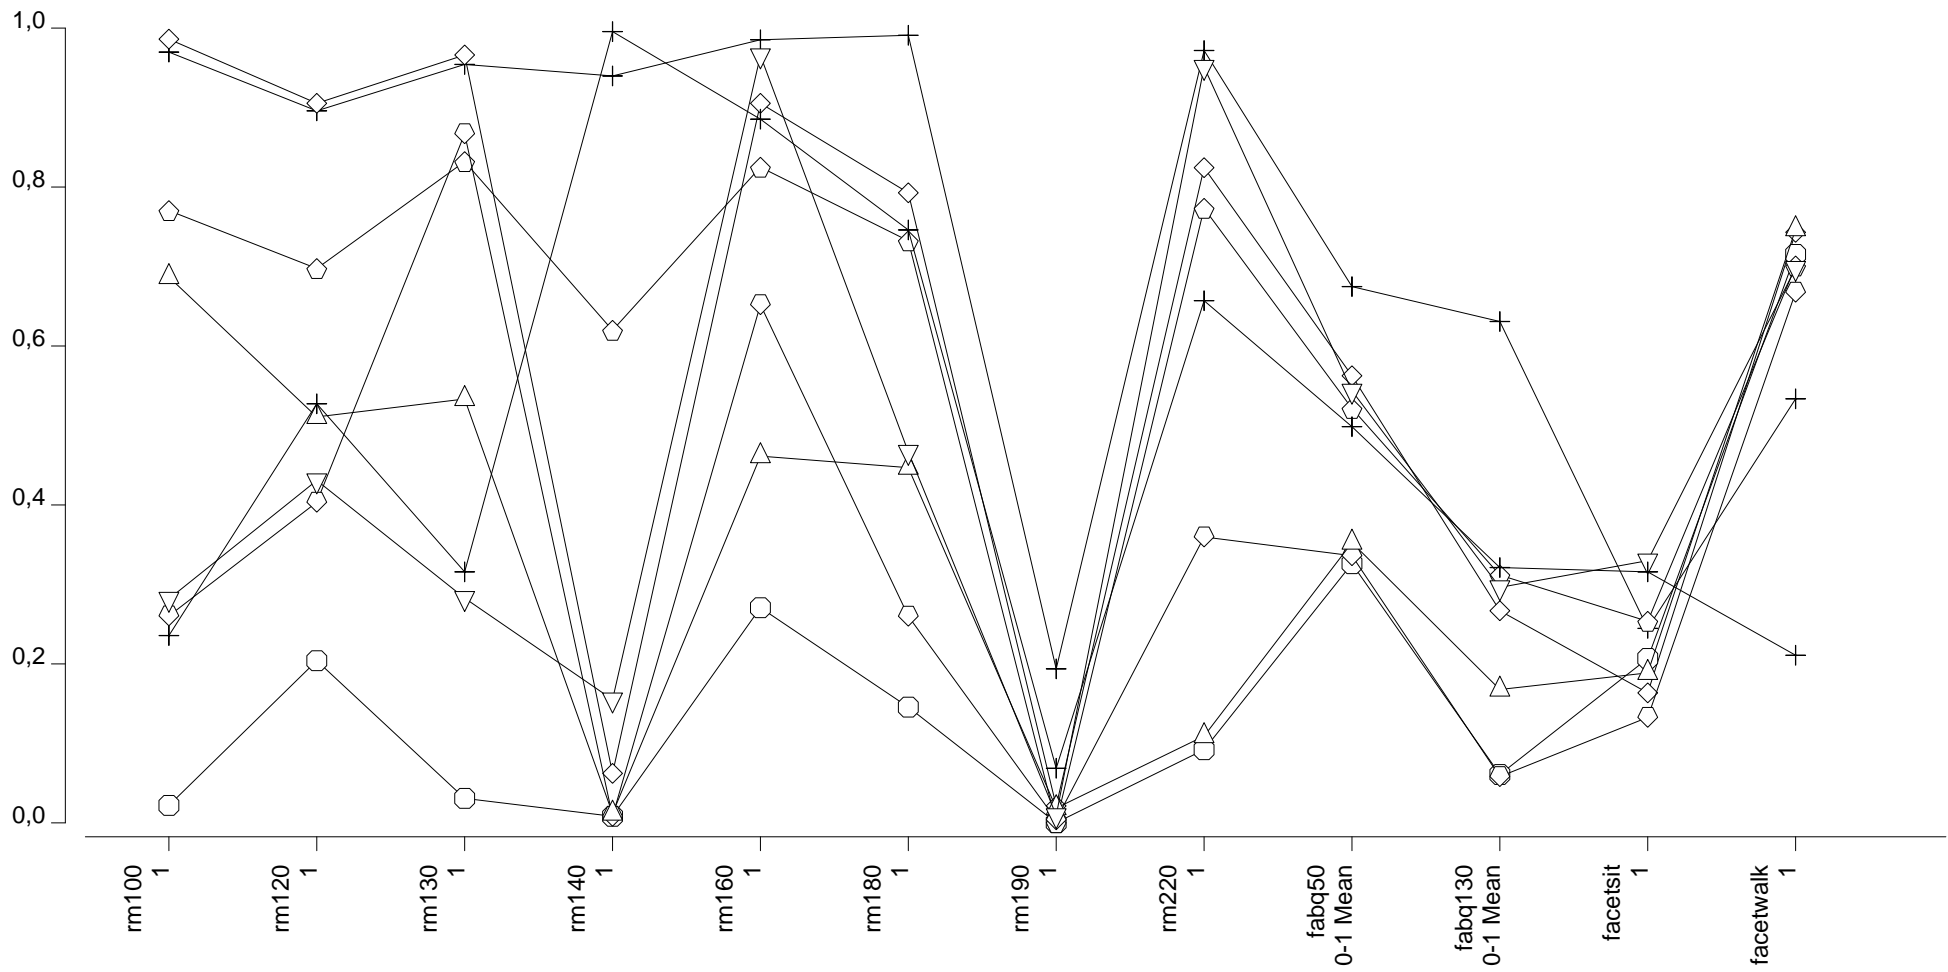

- Cluster1 +
- Cluster2 ◇
- Cluster3 ○
- Cluster4 ◇
- Cluster5 ◇
- Cluster6 △
- Cluster7 ▽
- Cluster8 +



**Profiles in numbers – activity domain, single-item, 5-DP**

The first row of numbers shows how large each cluster is. The body of the table contains (marginal) conditional probabilities that show how the clusters are related to the Nominal or Ordinal indicator variables. These probabilities sum to 1 within each cluster (column).

For indicators specified as Continuous, the body of the table contains means instead of probabilities. For indicators specified as Ordinal, means are displayed in addition to the conditional probabilities.

| 5-DP, act, single | Cluster 1 | s.e.   | Cluster 2 | s.e.   | Cluster 3 | s.e.   | Cluster 4 | s.e.   | Cluster 5 | s.e.   |
|-------------------|-----------|--------|-----------|--------|-----------|--------|-----------|--------|-----------|--------|
| Cluster Size      | 27,31%    | 0,0227 | 25,49%    | 0,0215 | 15,83%    | 0,0146 | 15,72%    | 0,0166 | 15,64%    | 0,0185 |
| Indicators        |           |        |           |        |           |        |           |        |           |        |
| start30           |           |        |           |        |           |        |           |        |           |        |
| 0                 | 0,2965    | 0,0334 | 0,7092    | 0,0427 | 0,9797    | 0,0126 | 0,6541    | 0,0511 | 0,9638    | 0,0212 |
| 1                 | 0,7035    | 0,0334 | 0,2908    | 0,0427 | 0,0203    | 0,0126 | 0,3459    | 0,0511 | 0,0362    | 0,0212 |
| start40           |           |        |           |        |           |        |           |        |           |        |
| 0                 | 0,1796    | 0,0271 | 0,0526    | 0,0207 | 0,9119    | 0,0268 | 0,7285    | 0,0515 | 0,2371    | 0,0513 |
| 1                 | 0,8204    | 0,0271 | 0,9474    | 0,0207 | 0,0881    | 0,0268 | 0,2715    | 0,0515 | 0,7629    | 0,0513 |
| rm20              |           |        |           |        |           |        |           |        |           |        |
| 0                 | 0,0778    | 0,0179 | 0,0865    | 0,0208 | 0,2811    | 0,0391 | 0,1141    | 0,0304 | 0,1507    | 0,0332 |
| 1                 | 0,9222    | 0,0179 | 0,9135    | 0,0208 | 0,7189    | 0,0391 | 0,8859    | 0,0304 | 0,8493    | 0,0332 |
| rm30              |           |        |           |        |           |        |           |        |           |        |
| 0                 | 0,0004    | 0,0015 | 0,1748    | 0,0344 | 0,8638    | 0,0336 | 0,3174    | 0,0507 | 0,6814    | 0,0496 |
| 1                 | 0,9996    | 0,0015 | 0,8252    | 0,0344 | 0,1362    | 0,0336 | 0,6826    | 0,0507 | 0,3186    | 0,0496 |
| rm40              |           |        |           |        |           |        |           |        |           |        |
| 0                 | 0,1586    | 0,0262 | 0,3874    | 0,0397 | 0,8977    | 0,0321 | 0,4446    | 0,0489 | 0,7453    | 0,0486 |
| 1                 | 0,8414    | 0,0262 | 0,6126    | 0,0397 | 0,1023    | 0,0321 | 0,5554    | 0,0489 | 0,2547    | 0,0486 |
| rm50              |           |        |           |        |           |        |           |        |           |        |
| 0                 | 0,1239    | 0,0268 | 0,506     | 0,0428 | 0,8934    | 0,0284 | 0,5815    | 0,049  | 0,8499    | 0,04   |
| 1                 | 0,8761    | 0,0268 | 0,494     | 0,0428 | 0,1066    | 0,0284 | 0,4185    | 0,049  | 0,1501    | 0,04   |
| rm60              |           |        |           |        |           |        |           |        |           |        |
| 0                 | 0,0627    | 0,0186 | 0,2407    | 0,0395 | 0,9499    | 0,0223 | 0,6131    | 0,0504 | 0,6588    | 0,0481 |
| 1                 | 0,9373    | 0,0186 | 0,7593    | 0,0395 | 0,0501    | 0,0223 | 0,3869    | 0,0504 | 0,3412    | 0,0481 |
| rm70              |           |        |           |        |           |        |           |        |           |        |
| 0                 | 0,0189    | 0,0119 | 0,0175    | 0,0132 | 0,9927    | 0,0115 | 0,7882    | 0,0539 | 0,1913    | 0,0519 |
| 1                 | 0,9811    | 0,0119 | 0,9825    | 0,0132 | 0,0073    | 0,0115 | 0,2118    | 0,0539 | 0,8087    | 0,0519 |
| rm80              |           |        |           |        |           |        |           |        |           |        |
| 0                 | 0,4       | 0,0368 | 0,8306    | 0,0324 | 0,9354    | 0,0212 | 0,6932    | 0,0476 | 0,9715    | 0,0184 |
| 1                 | 0,6       | 0,0368 | 0,1694    | 0,0324 | 0,0646    | 0,0212 | 0,3068    | 0,0476 | 0,0285    | 0,0184 |
| rm90              |           |        |           |        |           |        |           |        |           |        |
| 0                 | 0,0937    | 0,0203 | 0,2048    | 0,034  | 0,7808    | 0,0401 | 0,4204    | 0,0466 | 0,4472    | 0,0478 |
| 1                 | 0,9063    | 0,0203 | 0,7952    | 0,034  | 0,2192    | 0,0401 | 0,5796    | 0,0466 | 0,5528    | 0,0478 |
| rm100             |           |        |           |        |           |        |           |        |           |        |
| 0                 | 0,0456    | 0,0148 | 0,0981    | 0,034  | 0,9295    | 0,0266 | 0,6396    | 0,0499 | 0,5922    | 0,0491 |
| 1                 | 0,9544    | 0,0148 | 0,9019    | 0,034  | 0,0705    | 0,0266 | 0,3604    | 0,0499 | 0,4078    | 0,0491 |
| rm120             |           |        |           |        |           |        |           |        |           |        |
| 0                 | 0,1092    | 0,0216 | 0,1701    | 0,0326 | 0,787     | 0,0373 | 0,5091    | 0,0488 | 0,5783    | 0,0501 |
| 1                 | 0,8908    | 0,0216 | 0,8299    | 0,0326 | 0,213     | 0,0373 | 0,4909    | 0,0488 | 0,4217    | 0,0501 |
| rm130             |           |        |           |        |           |        |           |        |           |        |
| 0                 | 0,0668    | 0,019  | 0,0502    | 0,021  | 0,9708    | 0,0214 | 0,708     | 0,0475 | 0,1837    | 0,0454 |
| 1                 | 0,9332    | 0,019  | 0,9498    | 0,021  | 0,0292    | 0,0214 | 0,292     | 0,0475 | 0,8163    | 0,0454 |

|           |        |        |        |        |        |        |        |        |        |        |  |
|-----------|--------|--------|--------|--------|--------|--------|--------|--------|--------|--------|--|
| rm140     |        |        |        |        |        |        |        |        |        |        |  |
| 0         | 0,0443 | 0,0294 | 0,7395 | 0,0458 | 0,9926 | 0,0074 | 0,6162 | 0,0546 | 0,9963 | 0,0088 |  |
| 1         | 0,9557 | 0,0294 | 0,2605 | 0,0458 | 0,0074 | 0,0074 | 0,3838 | 0,0546 | 0,0037 | 0,0088 |  |
| rm160     |        |        |        |        |        |        |        |        |        |        |  |
| 0         | 0,0127 | 0,008  | 0,13   | 0,0261 | 0,7037 | 0,0458 | 0,0979 | 0,0333 | 0,4694 | 0,0533 |  |
| 1         | 0,9873 | 0,008  | 0,87   | 0,0261 | 0,2963 | 0,0458 | 0,9021 | 0,0333 | 0,5306 | 0,0533 |  |
| rm180     |        |        |        |        |        |        |        |        |        |        |  |
| 0         | 0,005  | 0,0127 | 0,2341 | 0,0387 | 0,8484 | 0,0341 | 0,4073 | 0,0519 | 0,7224 | 0,0465 |  |
| 1         | 0,995  | 0,0127 | 0,7659 | 0,0387 | 0,1516 | 0,0341 | 0,5927 | 0,0519 | 0,2776 | 0,0465 |  |
| rm190     |        |        |        |        |        |        |        |        |        |        |  |
| 0         | 0,8097 | 0,0266 | 0,9835 | 0,011  | 0,9999 | 0,0008 | 0,9766 | 0,0156 | 0,9909 | 0,0103 |  |
| 1         | 0,1903 | 0,0266 | 0,0165 | 0,011  | 0,0001 | 0,0008 | 0,0234 | 0,0156 | 0,0091 | 0,0103 |  |
| rm220     |        |        |        |        |        |        |        |        |        |        |  |
| 0         | 0,0364 | 0,0144 | 0,1895 | 0,0332 | 0,8831 | 0,0357 | 0,2732 | 0,0478 | 0,7499 | 0,0554 |  |
| 1         | 0,9636 | 0,0144 | 0,8105 | 0,0332 | 0,1169 | 0,0357 | 0,7268 | 0,0478 | 0,2501 | 0,0554 |  |
| fabq50    |        |        |        |        |        |        |        |        |        |        |  |
| 0         | 0,0538 | 0,0101 | 0,1105 | 0,0166 | 0,2901 | 0,0326 | 0,1364 | 0,0229 | 0,2912 | 0,0354 |  |
| 1         | 0,0549 | 0,0085 | 0,0928 | 0,0119 | 0,1687 | 0,0176 | 0,1071 | 0,0145 | 0,169  | 0,0182 |  |
| 2         | 0,0832 | 0,0099 | 0,1154 | 0,0118 | 0,1454 | 0,0133 | 0,1247 | 0,0129 | 0,1454 | 0,0133 |  |
| 3         | 0,2169 | 0,0153 | 0,2469 | 0,0154 | 0,2157 | 0,0169 | 0,2499 | 0,0154 | 0,2153 | 0,0176 |  |
| 4         | 0,1201 | 0,012  | 0,1122 | 0,0116 | 0,068  | 0,0097 | 0,1063 | 0,0117 | 0,0677 | 0,0103 |  |
| 5         | 0,1866 | 0,0172 | 0,1431 | 0,015  | 0,06   | 0,0108 | 0,1269 | 0,016  | 0,0597 | 0,0118 |  |
| 6         | 0,2844 | 0,0263 | 0,1791 | 0,0219 | 0,0521 | 0,012  | 0,1487 | 0,0236 | 0,0517 | 0,0131 |  |
| Mean      | 3,9922 | 0,1308 | 3,3032 | 0,1465 | 1,9911 | 0,166  | 3,058  | 0,1859 | 1,9852 | 0,184  |  |
| fabq130   |        |        |        |        |        |        |        |        |        |        |  |
| 0         | 0,324  | 0,0348 | 0,6914 | 0,041  | 0,9155 | 0,0252 | 0,6628 | 0,0478 | 0,8714 | 0,0339 |  |
| 1         | 0,0879 | 0,0113 | 0,0801 | 0,0107 | 0,0405 | 0,0088 | 0,0827 | 0,0112 | 0,052  | 0,0098 |  |
| 2         | 0,5881 | 0,0365 | 0,2286 | 0,0372 | 0,0441 | 0,0178 | 0,2545 | 0,0437 | 0,0766 | 0,0262 |  |
| Mean      | 1,264  | 0,0704 | 0,5372 | 0,0775 | 0,1286 | 0,0427 | 0,5917 | 0,0909 | 0,2053 | 0,0598 |  |
| facetsit  |        |        |        |        |        |        |        |        |        |        |  |
| 0         | 0,7583 | 0,0309 | 0,7989 | 0,0322 | 0,8017 | 0,038  | 0,6899 | 0,0453 | 0,8398 | 0,0384 |  |
| 1         | 0,2417 | 0,0309 | 0,2011 | 0,0322 | 0,1983 | 0,038  | 0,3101 | 0,0453 | 0,1602 | 0,0384 |  |
| facetwalk |        |        |        |        |        |        |        |        |        |        |  |
| 0         | 0,4746 | 0,0366 | 0,2674 | 0,0379 | 0,2826 | 0,0417 | 0,4338 | 0,0501 | 0,2885 | 0,0469 |  |
| 1         | 0,5254 | 0,0366 | 0,7326 | 0,0379 | 0,7174 | 0,0417 | 0,5662 | 0,0501 | 0,7115 | 0,0469 |  |

| <b>Loadings – activity domain, single-item, 5-DP</b> | <b>Clusters</b> | <b>R<sup>2</sup></b> | <b>Loadings</b>                                                                                                                                                                                                                                                                                                                                |
|------------------------------------------------------|-----------------|----------------------|------------------------------------------------------------------------------------------------------------------------------------------------------------------------------------------------------------------------------------------------------------------------------------------------------------------------------------------------|
| start30                                              | 0,5516          | 0,3042               | <p>The quantities reported under Clusters are simply correlations, representing the square root of the corresponding 'R2' or communality of the associated indicator.</p> <p>Correlations: These are standardised values for the loadings reported in the Loadings output. They represent correlations between the indicators and factors.</p> |
| start40                                              | 0,6755          | 0,4563               |                                                                                                                                                                                                                                                                                                                                                |
| rm20                                                 | 0,2096          | 0,0439               |                                                                                                                                                                                                                                                                                                                                                |
| rm30                                                 | 0,6693          | 0,4479               |                                                                                                                                                                                                                                                                                                                                                |
| rm40                                                 | 0,5268          | 0,2776               |                                                                                                                                                                                                                                                                                                                                                |
| rm50                                                 | 0,5755          | 0,3312               |                                                                                                                                                                                                                                                                                                                                                |
| rm60                                                 | 0,6462          | 0,4176               |                                                                                                                                                                                                                                                                                                                                                |
| rm70                                                 | 0,8484          | 0,7198               |                                                                                                                                                                                                                                                                                                                                                |
| rm80                                                 | 0,4953          | 0,2453               |                                                                                                                                                                                                                                                                                                                                                |
| rm90                                                 | 0,4951          | 0,2451               |                                                                                                                                                                                                                                                                                                                                                |
| rm100                                                | 0,7032          | 0,4945               |                                                                                                                                                                                                                                                                                                                                                |
| rm120                                                | 0,5331          | 0,2842               |                                                                                                                                                                                                                                                                                                                                                |
| rm130                                                | 0,769           | 0,5914               |                                                                                                                                                                                                                                                                                                                                                |
| rm140                                                | 0,7624          | 0,5813               |                                                                                                                                                                                                                                                                                                                                                |
| rm160                                                | 0,5886          | 0,3465               |                                                                                                                                                                                                                                                                                                                                                |
| rm180                                                | 0,6442          | 0,415                |                                                                                                                                                                                                                                                                                                                                                |
| rm190                                                | 0,3309          | 0,1095               |                                                                                                                                                                                                                                                                                                                                                |
| rm220                                                | 0,6735          | 0,4536               |                                                                                                                                                                                                                                                                                                                                                |
| fabq50                                               | 0,3905          | 0,1525               |                                                                                                                                                                                                                                                                                                                                                |
| fabq130                                              | 0,4778          | 0,2283               |                                                                                                                                                                                                                                                                                                                                                |
| facetsit                                             | 0,1108          | 0,0123               |                                                                                                                                                                                                                                                                                                                                                |
| facetwalk                                            | 0,191           | 0,0365               |                                                                                                                                                                                                                                                                                                                                                |

**Profiles in numbers – activity domain, single-item, 6-DP**

The first row of numbers shows how large each cluster is. The body of the table contains (marginal) conditional probabilities that show how the clusters are related to the Nominal or Ordinal indicator variables. These probabilities sum to 1 within each cluster (column).

For indicators specified as Continuous, the body of the table contains means instead of probabilities. For indicators specified as Ordinal, means are displayed in addition to the conditional probabilities.

| 6-DP, act., single | Cluster1 | s.e.   | Cluster2 | s.e.   | Cluster3 | s.e.   | Cluster4 | s.e.   | Cluster5 | s.e.   | Cluster6 | s.e.   |
|--------------------|----------|--------|----------|--------|----------|--------|----------|--------|----------|--------|----------|--------|
| Cluster Size       | 27,03%   | 0,0233 | 25,28%   | 0,0225 | 14,39%   | 0,0183 | 13,45%   | 0,0199 | 13,45%   | 0,0146 | 6,40%    | 0,0151 |
| Indicators         |          |        |          |        |          |        |          |        |          |        |          |        |
| start30            |          |        |          |        |          |        |          |        |          |        |          |        |
| 0                  | 0,3058   | 0,0341 | 0,72     | 0,0444 | 0,9405   | 0,0434 | 0,95     | 0,0266 | 0,9774   | 0,0145 | 0,1848   | 0,0802 |
| 1                  | 0,6942   | 0,0341 | 0,28     | 0,0444 | 0,0595   | 0,0434 | 0,05     | 0,0266 | 0,0226   | 0,0145 | 0,8152   | 0,0802 |
| start40            |          |        |          |        |          |        |          |        |          |        |          |        |
| 0                  | 0,177    | 0,0269 | 0,066    | 0,0236 | 0,8237   | 0,0555 | 0,1351   | 0,0467 | 0,907    | 0,0301 | 0,5551   | 0,09   |
| 1                  | 0,823    | 0,0269 | 0,934    | 0,0236 | 0,1763   | 0,0555 | 0,8649   | 0,0467 | 0,093    | 0,0301 | 0,4449   | 0,09   |
| rm20               |          |        |          |        |          |        |          |        |          |        |          |        |
| 0                  | 0,0736   | 0,0177 | 0,091    | 0,0216 | 0,1291   | 0,0353 | 0,1572   | 0,0362 | 0,2947   | 0,0437 | 0,1099   | 0,0518 |
| 1                  | 0,9264   | 0,0177 | 0,909    | 0,0216 | 0,8709   | 0,0353 | 0,8428   | 0,0362 | 0,7053   | 0,0437 | 0,8901   | 0,0518 |
| rm30               |          |        |          |        |          |        |          |        |          |        |          |        |
| 0                  | 0,0003   | 0,0014 | 0,1781   | 0,0352 | 0,5032   | 0,0555 | 0,6828   | 0,0591 | 0,8999   | 0,033  | 0,1145   | 0,0618 |
| 1                  | 0,9997   | 0,0014 | 0,8219   | 0,0352 | 0,4968   | 0,0555 | 0,3172   | 0,0591 | 0,1001   | 0,033  | 0,8855   | 0,0618 |
| rm40               |          |        |          |        |          |        |          |        |          |        |          |        |
| 0                  | 0,151    | 0,0263 | 0,396    | 0,0412 | 0,5099   | 0,0593 | 0,732    | 0,0517 | 0,9307   | 0,0292 | 0,5095   | 0,0769 |
| 1                  | 0,849    | 0,0263 | 0,604    | 0,0412 | 0,4901   | 0,0593 | 0,268    | 0,0517 | 0,0693   | 0,0292 | 0,4905   | 0,0769 |
| rm50               |          |        |          |        |          |        |          |        |          |        |          |        |
| 0                  | 0,1254   | 0,0282 | 0,4947   | 0,0432 | 0,667    | 0,048  | 0,8704   | 0,0472 | 0,9125   | 0,0309 | 0,5292   | 0,0775 |
| 1                  | 0,8746   | 0,0282 | 0,5053   | 0,0432 | 0,333    | 0,048  | 0,1296   | 0,0472 | 0,0875   | 0,0309 | 0,4708   | 0,0775 |
| rm60               |          |        |          |        |          |        |          |        |          |        |          |        |
| 0                  | 0,0621   | 0,0188 | 0,2185   | 0,0432 | 0,6196   | 0,0543 | 0,7158   | 0,0515 | 0,9557   | 0,0239 | 0,6586   | 0,0719 |
| 1                  | 0,9379   | 0,0188 | 0,7815   | 0,0432 | 0,3804   | 0,0543 | 0,2842   | 0,0515 | 0,0443   | 0,0239 | 0,3414   | 0,0719 |
| rm70               |          |        |          |        |          |        |          |        |          |        |          |        |
| 0                  | 0,0155   | 0,0096 | 0,0343   | 0,0176 | 0,8503   | 0,0498 | 0,0903   | 0,044  | 0,9865   | 0,0144 | 0,6357   | 0,0839 |
| 1                  | 0,9845   | 0,0096 | 0,9657   | 0,0176 | 0,1497   | 0,0498 | 0,9097   | 0,044  | 0,0135   | 0,0144 | 0,3643   | 0,0839 |
| rm80               |          |        |          |        |          |        |          |        |          |        |          |        |
| 0                  | 0,4074   | 0,0374 | 0,8303   | 0,0334 | 0,884    | 0,0335 | 0,9635   | 0,0214 | 0,929    | 0,024  | 0,4437   | 0,0924 |
| 1                  | 0,5926   | 0,0374 | 0,1697   | 0,0334 | 0,116    | 0,0335 | 0,0365   | 0,0214 | 0,071    | 0,024  | 0,5563   | 0,0924 |
| rm90               |          |        |          |        |          |        |          |        |          |        |          |        |
| 0                  | 0,0821   | 0,0197 | 0,2065   | 0,0364 | 0,3866   | 0,0533 | 0,4483   | 0,0506 | 0,8419   | 0,0415 | 0,528    | 0,0739 |
| 1                  | 0,9179   | 0,0197 | 0,7935   | 0,0364 | 0,6134   | 0,0533 | 0,5517   | 0,0506 | 0,1581   | 0,0415 | 0,472    | 0,0739 |
| rm100              |          |        |          |        |          |        |          |        |          |        |          |        |
| 0                  | 0,0354   | 0,0137 | 0,0791   | 0,038  | 0,6036   | 0,0533 | 0,6486   | 0,0557 | 0,9402   | 0,0287 | 0,7402   | 0,074  |
| 1                  | 0,9646   | 0,0137 | 0,9209   | 0,038  | 0,3964   | 0,0533 | 0,3514   | 0,0557 | 0,0598   | 0,0287 | 0,2598   | 0,074  |
| rm120              |          |        |          |        |          |        |          |        |          |        |          |        |
| 0                  | 0,1025   | 0,0212 | 0,1736   | 0,0347 | 0,5084   | 0,0518 | 0,5973   | 0,0583 | 0,8355   | 0,0413 | 0,4805   | 0,0777 |
| 1                  | 0,8975   | 0,0212 | 0,8264   | 0,0347 | 0,4916   | 0,0518 | 0,4027   | 0,0583 | 0,1645   | 0,0413 | 0,5195   | 0,0777 |
| rm130              |          |        |          |        |          |        |          |        |          |        |          |        |
| 0                  | 0,0501   | 0,016  | 0,0604   | 0,0213 | 0,7569   | 0,0521 | 0,137    | 0,04   | 0,9612   | 0,0218 | 0,6196   | 0,0778 |
| 1                  | 0,9499   | 0,016  | 0,9396   | 0,0213 | 0,2431   | 0,0521 | 0,863    | 0,04   | 0,0388   | 0,0218 | 0,3804   | 0,0778 |
| rm140              |          |        |          |        |          |        |          |        |          |        |          |        |
| 0                  | 0,0488   | 0,0297 | 0,7624   | 0,0505 | 0,938    | 0,0416 | 0,9928   | 0,0103 | 0,9917   | 0,0085 | 0,0446   | 0,0846 |
| 1                  | 0,9512   | 0,0297 | 0,2376   | 0,0505 | 0,062    | 0,0416 | 0,0072   | 0,0103 | 0,0083   | 0,0085 | 0,9554   | 0,0846 |

|           |        |        |        |        |        |        |        |        |        |        |        |        |
|-----------|--------|--------|--------|--------|--------|--------|--------|--------|--------|--------|--------|--------|
| rm160     |        |        |        |        |        |        |        |        |        |        |        |        |
| 0         | 0,0117 | 0,0079 | 0,1416 | 0,0285 | 0,1805 | 0,0525 | 0,4427 | 0,0568 | 0,7946 | 0,0483 | 0,087  | 0,043  |
| 1         | 0,9883 | 0,0079 | 0,8584 | 0,0285 | 0,8195 | 0,0525 | 0,5573 | 0,0568 | 0,2054 | 0,0483 | 0,913  | 0,043  |
| rm180     |        |        |        |        |        |        |        |        |        |        |        |        |
| 0         | 0,0069 | 0,014  | 0,2346 | 0,0397 | 0,5204 | 0,0535 | 0,7329 | 0,0541 | 0,8774 | 0,0349 | 0,3087 | 0,0751 |
| 1         | 0,9931 | 0,014  | 0,7654 | 0,0397 | 0,4796 | 0,0535 | 0,2671 | 0,0541 | 0,1226 | 0,0349 | 0,6913 | 0,0751 |
| rm190     |        |        |        |        |        |        |        |        |        |        |        |        |
| 0         | 0,8116 | 0,027  | 0,9819 | 0,0111 | 0,9895 | 0,0117 | 0,9937 | 0,01   | 0,9999 | 0,0008 | 0,9461 | 0,0371 |
| 1         | 0,1884 | 0,027  | 0,0181 | 0,0111 | 0,0105 | 0,0117 | 0,0063 | 0,01   | 0,0001 | 0,0008 | 0,0539 | 0,0371 |
| rm220     |        |        |        |        |        |        |        |        |        |        |        |        |
| 0         | 0,0308 | 0,0137 | 0,2014 | 0,0344 | 0,4107 | 0,0689 | 0,7126 | 0,0631 | 0,9346 | 0,0288 | 0,2884 | 0,0744 |
| 1         | 0,9692 | 0,0137 | 0,7986 | 0,0344 | 0,5893 | 0,0689 | 0,2874 | 0,0631 | 0,0654 | 0,0288 | 0,7116 | 0,0744 |
| fabq50    |        |        |        |        |        |        |        |        |        |        |        |        |
| 0         | 0,0509 | 0,0099 | 0,1092 | 0,0169 | 0,1544 | 0,0275 | 0,2933 | 0,0383 | 0,3233 | 0,0367 | 0,1432 | 0,0338 |
| 1         | 0,0531 | 0,0084 | 0,0925 | 0,012  | 0,1169 | 0,0162 | 0,1704 | 0,0187 | 0,1784 | 0,0184 | 0,1113 | 0,0195 |
| 2         | 0,0817 | 0,0099 | 0,1156 | 0,012  | 0,1308 | 0,0134 | 0,1461 | 0,0134 | 0,1453 | 0,0134 | 0,1277 | 0,0149 |
| 3         | 0,2156 | 0,0155 | 0,248  | 0,0155 | 0,2508 | 0,0156 | 0,2149 | 0,0186 | 0,2029 | 0,0183 | 0,2512 | 0,0155 |
| 4         | 0,1205 | 0,0121 | 0,1127 | 0,0116 | 0,1019 | 0,0119 | 0,067  | 0,0108 | 0,06   | 0,0097 | 0,1047 | 0,0131 |
| 5         | 0,1887 | 0,0174 | 0,1434 | 0,0152 | 0,116  | 0,0166 | 0,0584 | 0,0125 | 0,0497 | 0,0104 | 0,1222 | 0,0211 |
| 6         | 0,2895 | 0,0267 | 0,1787 | 0,0223 | 0,1293 | 0,024  | 0,0499 | 0,0138 | 0,0404 | 0,0108 | 0,1398 | 0,0333 |
| Mean      | 4,0257 | 0,1318 | 3,3075 | 0,1503 | 2,8939 | 0,2088 | 1,9667 | 0,1991 | 1,8087 | 0,174  | 2,9887 | 0,2819 |
| fabq130   |        |        |        |        |        |        |        |        |        |        |        |        |
| 0         | 0,3245 | 0,035  | 0,6817 | 0,0419 | 0,7163 | 0,0453 | 0,8939 | 0,0395 | 0,9369 | 0,0262 | 0,6433 | 0,0803 |
| 1         | 0,0885 | 0,0114 | 0,0815 | 0,0109 | 0,0779 | 0,0111 | 0,0467 | 0,0115 | 0,0337 | 0,0098 | 0,0848 | 0,0124 |
| 2         | 0,5871 | 0,0367 | 0,2368 | 0,0382 | 0,2059 | 0,0401 | 0,0594 | 0,0294 | 0,0294 | 0,0171 | 0,2719 | 0,0741 |
| Mean      | 1,2626 | 0,0708 | 0,5551 | 0,0794 | 0,4896 | 0,0848 | 0,1655 | 0,0687 | 0,0925 | 0,0432 | 0,6286 | 0,1541 |
| facetsit  |        |        |        |        |        |        |        |        |        |        |        |        |
| 0         | 0,7601 | 0,031  | 0,7903 | 0,033  | 0,7107 | 0,0477 | 0,8667 | 0,0382 | 0,811  | 0,0404 | 0,6874 | 0,0745 |
| 1         | 0,2399 | 0,031  | 0,2097 | 0,033  | 0,2893 | 0,0477 | 0,1333 | 0,0382 | 0,189  | 0,0404 | 0,3126 | 0,0745 |
| facetwalk |        |        |        |        |        |        |        |        |        |        |        |        |
| 0         | 0,4623 | 0,0368 | 0,2565 | 0,0377 | 0,3018 | 0,0505 | 0,3082 | 0,0512 | 0,286  | 0,0453 | 0,6789 | 0,1276 |
| 1         | 0,5377 | 0,0368 | 0,7435 | 0,0377 | 0,6982 | 0,0505 | 0,6918 | 0,0512 | 0,714  | 0,0453 | 0,3211 | 0,1276 |

Within the '6-DP model', cluster 4 from the '5-DP model' is split into cluster 3 and 6.

Within the '7-DP model' cluster 6 is seen as well (cluster 7) and cluster 3 is split into two new clusters (cluster 5 and 6).

Marked are the variables which have a probability larger than 70% and only for variables with  $R^2$  larger than 30%

| <b>Loadings, activity domain, single-item, 6-DP</b> | <b>Clusters</b> | <b>R<sup>2</sup></b> | <b>Loadings</b>                                                                                                                                                                                                                                                                                                                                    |
|-----------------------------------------------------|-----------------|----------------------|----------------------------------------------------------------------------------------------------------------------------------------------------------------------------------------------------------------------------------------------------------------------------------------------------------------------------------------------------|
| start30                                             | 0,6218          | 0,3866               | <p>The quantities reported under Clusters are simply correlations, representing the square root of the corresponding 'R<sup>2</sup>' or communality of the associated indicator. Correlations: These are standardised values for the loadings reported in the Loadings output. They represent correlations between the indicators and factors.</p> |
| start40                                             | 0,6956          | 0,4839               |                                                                                                                                                                                                                                                                                                                                                    |
| rm20                                                | 0,2112          | 0,0446               |                                                                                                                                                                                                                                                                                                                                                    |
| rm30                                                | 0,6781          | 0,4599               |                                                                                                                                                                                                                                                                                                                                                    |
| rm40                                                | 0,5185          | 0,2689               |                                                                                                                                                                                                                                                                                                                                                    |
| rm50                                                | 0,5755          | 0,3312               |                                                                                                                                                                                                                                                                                                                                                    |
| rm60                                                | 0,6534          | 0,427                |                                                                                                                                                                                                                                                                                                                                                    |
| rm70                                                | 0,8554          | 0,7317               |                                                                                                                                                                                                                                                                                                                                                    |
| rm80                                                | 0,5137          | 0,2639               |                                                                                                                                                                                                                                                                                                                                                    |
| rm90                                                | 0,5202          | 0,2706               |                                                                                                                                                                                                                                                                                                                                                    |
| rm100                                               | 0,7217          | 0,5208               |                                                                                                                                                                                                                                                                                                                                                    |
| rm120                                               | 0,5435          | 0,2954               |                                                                                                                                                                                                                                                                                                                                                    |
| rm130                                               | 0,7689          | 0,5913               |                                                                                                                                                                                                                                                                                                                                                    |
| rm140                                               | 0,8362          | 0,6992               |                                                                                                                                                                                                                                                                                                                                                    |
| rm160                                               | 0,6015          | 0,3619               |                                                                                                                                                                                                                                                                                                                                                    |
| rm180                                               | 0,6412          | 0,4112               |                                                                                                                                                                                                                                                                                                                                                    |
| rm190                                               | 0,3262          | 0,1064               |                                                                                                                                                                                                                                                                                                                                                    |
| rm220                                               | 0,6511          | 0,4239               |                                                                                                                                                                                                                                                                                                                                                    |
| fabq50                                              | 0,3997          | 0,1597               |                                                                                                                                                                                                                                                                                                                                                    |
| fabq130                                             | 0,478           | 0,2285               |                                                                                                                                                                                                                                                                                                                                                    |
| facetsit                                            | 0,1203          | 0,0145               |                                                                                                                                                                                                                                                                                                                                                    |
| facetwalk                                           | 0,2436          | 0,0593               |                                                                                                                                                                                                                                                                                                                                                    |

**Profiles in numbers, 7-DP:**

The first row of numbers shows how large each cluster is. The body of the table contains (marginal) conditional probabilities that show how the clusters are related to the Nominal or Ordinal indicator variables. These probabilities sum to 1 within each cluster (column).

For indicators specified as Continuous, the body of the table contains means instead of probabilities. For indicators specified as Ordinal, means are displayed in addition to the conditional probabilities.

| 7-DP, act. domain | Cluster1 | s.e.   | Cluster2 | s.e.   | Cluster3 | s.e.   | Cluster4 | s.e.   | Cluster5 | s.e.   | Cluster6 | s.e.   | Cluster7 | s.e.   |
|-------------------|----------|--------|----------|--------|----------|--------|----------|--------|----------|--------|----------|--------|----------|--------|
| Cluster Size      | 26,43%   | 0,0217 | 24,86%   | 0,0208 | 14,29%   | 0,0148 | 10,84%   | 0,0167 | 9,18%    | 0,0149 | 9,05%    | 0,0134 | 5,35%    | 0,0093 |
| <b>Indicators</b> |          |        |          |        |          |        |          |        |          |        |          |        |          |        |
| start30           |          |        |          |        |          |        |          |        |          |        |          |        |          |        |
| 0                 | 0,303    | 0,0339 | 0,7094   | 0,0421 | 0,9778   | 0,0137 | 0,9409   | 0,0319 | 0,9788   | 0,0351 | 0,8199   | 0,0549 | 0,1664   | 0,0659 |
| 1                 | 0,697    | 0,0339 | 0,2906   | 0,0421 | 0,0222   | 0,0137 | 0,0591   | 0,0319 | 0,0212   | 0,0351 | 0,1801   | 0,0549 | 0,8336   | 0,0659 |
| start40           |          |        |          |        |          |        |          |        |          |        |          |        |          |        |
| 0                 | 0,1824   | 0,0274 | 0,0522   | 0,0224 | 0,903    | 0,0289 | 0,0027   | 0,0117 | 0,7791   | 0,1001 | 0,7358   | 0,0628 | 0,5622   | 0,0822 |
| 1                 | 0,8176   | 0,0274 | 0,9478   | 0,0224 | 0,097    | 0,0289 | 0,9973   | 0,0117 | 0,2209   | 0,1001 | 0,2642   | 0,0628 | 0,4378   | 0,0822 |
| rm20              |          |        |          |        |          |        |          |        |          |        |          |        |          |        |
| 0                 | 0,0747   | 0,018  | 0,0851   | 0,0209 | 0,294    | 0,0417 | 0,1745   | 0,0422 | 0,1012   | 0,0411 | 0,147    | 0,0438 | 0,0917   | 0,0454 |
| 1                 | 0,9253   | 0,018  | 0,9149   | 0,0209 | 0,706    | 0,0417 | 0,8255   | 0,0422 | 0,8988   | 0,0411 | 0,853    | 0,0438 | 0,9083   | 0,0454 |
| rm30              |          |        |          |        |          |        |          |        |          |        |          |        |          |        |
| 0                 | 0,0003   | 0,0012 | 0,1708   | 0,0325 | 0,8511   | 0,0394 | 0,6703   | 0,0615 | 0,5532   | 0,0673 | 0,515    | 0,0654 | 0,0657   | 0,0425 |
| 1                 | 0,9997   | 0,0012 | 0,8292   | 0,0325 | 0,1489   | 0,0394 | 0,3297   | 0,0615 | 0,4468   | 0,0673 | 0,485    | 0,0654 | 0,9343   | 0,0425 |
| rm40              |          |        |          |        |          |        |          |        |          |        |          |        |          |        |
| 0                 | 0,1488   | 0,0264 | 0,3881   | 0,0406 | 0,9111   | 0,0299 | 0,6907   | 0,0558 | 0,8053   | 0,0582 | 0,28     | 0,0633 | 0,5636   | 0,0808 |
| 1                 | 0,8512   | 0,0264 | 0,6119   | 0,0406 | 0,0889   | 0,0299 | 0,3093   | 0,0558 | 0,1947   | 0,0582 | 0,72     | 0,0633 | 0,4364   | 0,0808 |
| rm50              |          |        |          |        |          |        |          |        |          |        |          |        |          |        |
| 0                 | 0,1212   | 0,0265 | 0,4876   | 0,042  | 0,9106   | 0,0304 | 0,8828   | 0,0481 | 0,6696   | 0,0637 | 0,6606   | 0,0606 | 0,529    | 0,0794 |
| 1                 | 0,8788   | 0,0265 | 0,5124   | 0,042  | 0,0894   | 0,0304 | 0,1172   | 0,0481 | 0,3304   | 0,0637 | 0,3394   | 0,0606 | 0,471    | 0,0794 |
| rm60              |          |        |          |        |          |        |          |        |          |        |          |        |          |        |
| 0                 | 0,0619   | 0,019  | 0,2051   | 0,0383 | 0,9982   | 0,0063 | 0,8094   | 0,0552 | 0,3535   | 0,0886 | 0,6666   | 0,0662 | 0,7038   | 0,0762 |
| 1                 | 0,9381   | 0,019  | 0,7949   | 0,0383 | 0,0018   | 0,0063 | 0,1906   | 0,0552 | 0,6465   | 0,0886 | 0,3334   | 0,0662 | 0,2962   | 0,0762 |
| rm70              |          |        |          |        |          |        |          |        |          |        |          |        |          |        |
| 0                 | 0,017    | 0,0101 | 0,0217   | 0,0181 | 0,9916   | 0,01   | 0,033    | 0,0338 | 0,6237   | 0,0896 | 0,8219   | 0,058  | 0,6334   | 0,0842 |
| 1                 | 0,983    | 0,0101 | 0,9783   | 0,0181 | 0,0084   | 0,01   | 0,967    | 0,0338 | 0,3763   | 0,0896 | 0,1781   | 0,058  | 0,3666   | 0,0842 |
| rm80              |          |        |          |        |          |        |          |        |          |        |          |        |          |        |
| 0                 | 0,4024   | 0,0377 | 0,821    | 0,0317 | 0,9284   | 0,0241 | 0,9595   | 0,0256 | 0,9412   | 0,0317 | 0,833    | 0,0493 | 0,3965   | 0,0805 |
| 1                 | 0,5976   | 0,0377 | 0,179    | 0,0317 | 0,0716   | 0,0241 | 0,0405   | 0,0256 | 0,0588   | 0,0317 | 0,167    | 0,0493 | 0,6035   | 0,0805 |
| rm90              |          |        |          |        |          |        |          |        |          |        |          |        |          |        |
| 0                 | 0,0836   | 0,02   | 0,1953   | 0,034  | 0,8094   | 0,0413 | 0,448    | 0,057  | 0,4155   | 0,066  | 0,4087   | 0,062  | 0,5114   | 0,0794 |
| 1                 | 0,9164   | 0,02   | 0,8047   | 0,034  | 0,1906   | 0,0413 | 0,552    | 0,057  | 0,5845   | 0,066  | 0,5913   | 0,062  | 0,4886   | 0,0794 |
| rm100             |          |        |          |        |          |        |          |        |          |        |          |        |          |        |
| 0                 | 0,038    | 0,0143 | 0,0591   | 0,0291 | 0,9789   | 0,0217 | 0,7295   | 0,0667 | 0,3304   | 0,0833 | 0,6955   | 0,0662 | 0,7611   | 0,0724 |
| 1                 | 0,962    | 0,0143 | 0,9409   | 0,0291 | 0,0211   | 0,0217 | 0,2705   | 0,0667 | 0,6696   | 0,0833 | 0,3045   | 0,0662 | 0,2389   | 0,0724 |

|           |        |        |        |        |        |        |        |        |        |        |        |        |        |        |
|-----------|--------|--------|--------|--------|--------|--------|--------|--------|--------|--------|--------|--------|--------|--------|
| rm120     |        |        |        |        |        |        |        |        |        |        |        |        |        |        |
| 0         | 0,1038 | 0,0216 | 0,1624 | 0,0314 | 0,7952 | 0,0414 | 0,5946 | 0,0602 | 0,4845 | 0,0684 | 0,5945 | 0,0641 | 0,4494 | 0,0787 |
| 1         | 0,8962 | 0,0216 | 0,8376 | 0,0314 | 0,2048 | 0,0414 | 0,4054 | 0,0602 | 0,5155 | 0,0684 | 0,4055 | 0,0641 | 0,5506 | 0,0787 |
| rm130     |        |        |        |        |        |        |        |        |        |        |        |        |        |        |
| 0         | 0,0522 | 0,0166 | 0,0538 | 0,0195 | 0,9714 | 0,0184 | 0,1374 | 0,0403 | 0,4938 | 0,0899 | 0,7292 | 0,064  | 0,6084 | 0,0811 |
| 1         | 0,9478 | 0,0166 | 0,9462 | 0,0195 | 0,0286 | 0,0184 | 0,8626 | 0,0403 | 0,5062 | 0,0899 | 0,2708 | 0,064  | 0,3916 | 0,0811 |
| rm140     |        |        |        |        |        |        |        |        |        |        |        |        |        |        |
| 0         | 0,0398 | 0,0275 | 0,7438 | 0,0474 | 0,9917 | 0,0081 | 0,9896 | 0,0121 | 0,9883 | 0,0141 | 0,829  | 0,0553 | 0,0082 | 0,0281 |
| 1         | 0,9602 | 0,0275 | 0,2562 | 0,0474 | 0,0083 | 0,0081 | 0,0104 | 0,0121 | 0,0117 | 0,0141 | 0,171  | 0,0553 | 0,9918 | 0,0281 |
| rm160     |        |        |        |        |        |        |        |        |        |        |        |        |        |        |
| 0         | 0,0116 | 0,0081 | 0,136  | 0,0282 | 0,7264 | 0,0473 | 0,3647 | 0,0568 | 0,5343 | 0,0735 | 0,0296 | 0,0279 | 0,0925 | 0,0452 |
| 1         | 0,9884 | 0,0081 | 0,864  | 0,0282 | 0,2736 | 0,0473 | 0,6353 | 0,0568 | 0,4657 | 0,0735 | 0,9704 | 0,0279 | 0,9075 | 0,0452 |
| rm180     |        |        |        |        |        |        |        |        |        |        |        |        |        |        |
| 0         | 0,0024 | 0,0099 | 0,2283 | 0,0381 | 0,8571 | 0,0395 | 0,7413 | 0,054  | 0,5519 | 0,0683 | 0,5201 | 0,0686 | 0,2701 | 0,0709 |
| 1         | 0,9976 | 0,0099 | 0,7717 | 0,0381 | 0,1429 | 0,0395 | 0,2587 | 0,054  | 0,4481 | 0,0683 | 0,4799 | 0,0686 | 0,7299 | 0,0709 |
| rm190     |        |        |        |        |        |        |        |        |        |        |        |        |        |        |
| 0         | 0,8086 | 0,0272 | 0,9794 | 0,0116 | 0,9999 | 0,0007 | 0,9968 | 0,0135 | 0,9841 | 0,017  | 0,9891 | 0,0141 | 0,9481 | 0,0384 |
| 1         | 0,1914 | 0,0272 | 0,0206 | 0,0116 | 0,0001 | 0,0007 | 0,0032 | 0,0135 | 0,0159 | 0,017  | 0,0109 | 0,0141 | 0,0519 | 0,0384 |
| rm220     |        |        |        |        |        |        |        |        |        |        |        |        |        |        |
| 0         | 0,0289 | 0,0138 | 0,1937 | 0,0341 | 0,9038 | 0,032  | 0,6484 | 0,064  | 0,8891 | 0,0613 | 0,0267 | 0,0569 | 0,3555 | 0,0775 |
| 1         | 0,9711 | 0,0138 | 0,8063 | 0,0341 | 0,0962 | 0,032  | 0,3516 | 0,064  | 0,1109 | 0,0613 | 0,9733 | 0,0569 | 0,6445 | 0,0775 |
| fabq50    |        |        |        |        |        |        |        |        |        |        |        |        |        |        |
| 0         | 0,0496 | 0,0097 | 0,1088 | 0,0167 | 0,2943 | 0,0334 | 0,2827 | 0,0395 | 0,2695 | 0,0448 | 0,1146 | 0,0275 | 0,147  | 0,0374 |
| 1         | 0,0519 | 0,0083 | 0,0921 | 0,0119 | 0,1703 | 0,0177 | 0,1669 | 0,0189 | 0,1629 | 0,0201 | 0,0954 | 0,0172 | 0,113  | 0,021  |
| 2         | 0,0805 | 0,0098 | 0,1153 | 0,0119 | 0,1459 | 0,0133 | 0,146  | 0,0133 | 0,1457 | 0,0134 | 0,1177 | 0,0145 | 0,1286 | 0,0155 |
| 3         | 0,2142 | 0,0155 | 0,2481 | 0,0155 | 0,2147 | 0,0172 | 0,2191 | 0,0189 | 0,2239 | 0,0201 | 0,2492 | 0,0158 | 0,2513 | 0,0155 |
| 4         | 0,1207 | 0,0121 | 0,113  | 0,0117 | 0,0669 | 0,0097 | 0,0697 | 0,0113 | 0,0728 | 0,0127 | 0,1117 | 0,0126 | 0,104  | 0,0136 |
| 5         | 0,1902 | 0,0175 | 0,1438 | 0,0151 | 0,0582 | 0,0108 | 0,0619 | 0,0133 | 0,0662 | 0,0158 | 0,1399 | 0,0204 | 0,1202 | 0,0227 |
| 6         | 0,293  | 0,0268 | 0,1789 | 0,0221 | 0,0496 | 0,0117 | 0,0537 | 0,015  | 0,0589 | 0,0185 | 0,1714 | 0,034  | 0,136  | 0,0358 |
| Mean      | 4,0472 | 0,1309 | 3,3115 | 0,1478 | 1,9627 | 0,1674 | 2,0266 | 0,2106 | 2,1018 | 0,2509 | 3,2532 | 0,2557 | 2,957  | 0,3097 |
| fabq130   |        |        |        |        |        |        |        |        |        |        |        |        |        |        |
| 0         | 0,3208 | 0,0354 | 0,6737 | 0,0405 | 0,9185 | 0,0274 | 0,9267 | 0,0356 | 0,791  | 0,0518 | 0,6425 | 0,0601 | 0,6621 | 0,0838 |
| 1         | 0,0886 | 0,0114 | 0,0825 | 0,0109 | 0,0398 | 0,0095 | 0,0372 | 0,0122 | 0,068  | 0,0118 | 0,0851 | 0,0118 | 0,0835 | 0,0128 |
| 2         | 0,5907 | 0,0372 | 0,2438 | 0,0371 | 0,0417 | 0,0191 | 0,0361 | 0,0241 | 0,141  | 0,0435 | 0,2724 | 0,0554 | 0,2544 | 0,0766 |
| Mean      | 1,2699 | 0,0717 | 0,5701 | 0,0769 | 0,1231 | 0,0463 | 0,1094 | 0,0596 | 0,35   | 0,0949 | 0,6298 | 0,115  | 0,5923 | 0,1601 |
| facetsit  |        |        |        |        |        |        |        |        |        |        |        |        |        |        |
| 0         | 0,7584 | 0,0315 | 0,7944 | 0,0327 | 0,7917 | 0,0405 | 0,8778 | 0,0388 | 0,7976 | 0,0584 | 0,6694 | 0,0606 | 0,6985 | 0,0796 |
| 1         | 0,2416 | 0,0315 | 0,2056 | 0,0327 | 0,2083 | 0,0405 | 0,1222 | 0,0388 | 0,2024 | 0,0584 | 0,3306 | 0,0606 | 0,3015 | 0,0796 |
| facetwalk |        |        |        |        |        |        |        |        |        |        |        |        |        |        |
| 0         | 0,4629 | 0,0371 | 0,2624 | 0,038  | 0,2878 | 0,0442 | 0,3386 | 0,0586 | 0,2643 | 0,0631 | 0,2727 | 0,0658 | 0,8082 | 0,0894 |
| 1         | 0,5371 | 0,0371 | 0,7376 | 0,038  | 0,7122 | 0,0442 | 0,6614 | 0,0586 | 0,7357 | 0,0631 | 0,7273 | 0,0658 | 0,1918 | 0,0894 |



### Profiles in numbers:

Within the '6-DP model', cluster 4 from the '5-DP model' splits into cluster 3 and 6.

Within the '7-DP model' cluster 6 is seen as well (cluster 7) and cluster 3 splits into two new clusters (cluster 5 and 6).

### Loadings – activity domain, single-item, 7-DP

The quantities reported under Clusters are simply correlations, representing the square root of the corresponding 'R<sup>2</sup>' or communality of the associated indicator.

Correlations: These are standardised values for the loadings reported in the Loadings output. They represent correlations between the indicators and factors.

| Loadings  | Clusters | R <sup>2</sup> |
|-----------|----------|----------------|
| start30   | 0,6088   | 0,3707         |
| start40   | 0,7191   | 0,5171         |
| rm20      | 0,222    | 0,0493         |
| rm30      | 0,661    | 0,437          |
| rm40      | 0,5526   | 0,3054         |
| rm50      | 0,5741   | 0,3296         |
| rm60      | 0,6993   | 0,489          |
| rm70      | 0,847    | 0,7174         |
| rm80      | 0,5175   | 0,2678         |
| rm90      | 0,5087   | 0,2588         |
| rm100     | 0,7663   | 0,5872         |
| rm120     | 0,536    | 0,2873         |
| rm130     | 0,7495   | 0,5618         |
| rm140     | 0,8297   | 0,6884         |
| rm160     | 0,6      | 0,36           |
| rm180     | 0,6381   | 0,4072         |
| rm190     | 0,3284   | 0,1079         |
| rm220     | 0,731    | 0,5344         |
| fabq50    | 0,4015   | 0,1612         |
| fabq130   | 0,4808   | 0,2312         |
| facetsit  | 0,1252   | 0,0157         |
| facetwalk | 0,2817   | 0,0794         |

### Activity domain, single-item strategy, 5-domain profiles

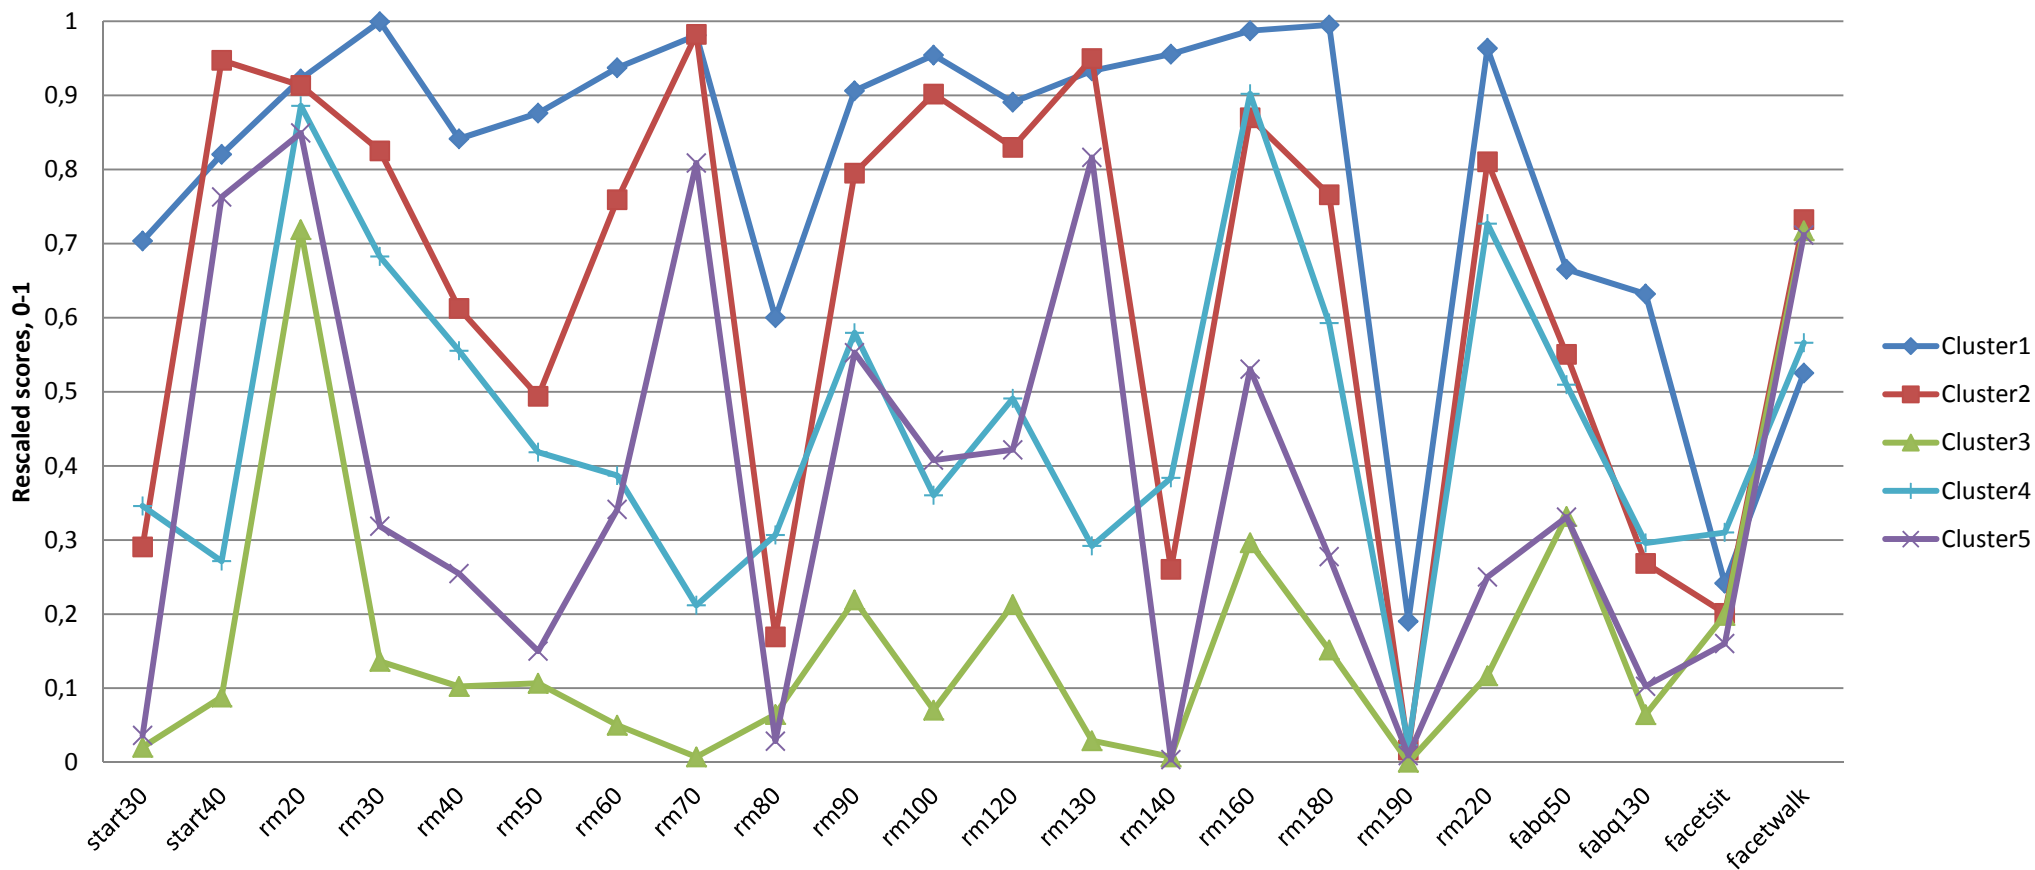

### Activity domain, single-item strategy, 6-domain profiles

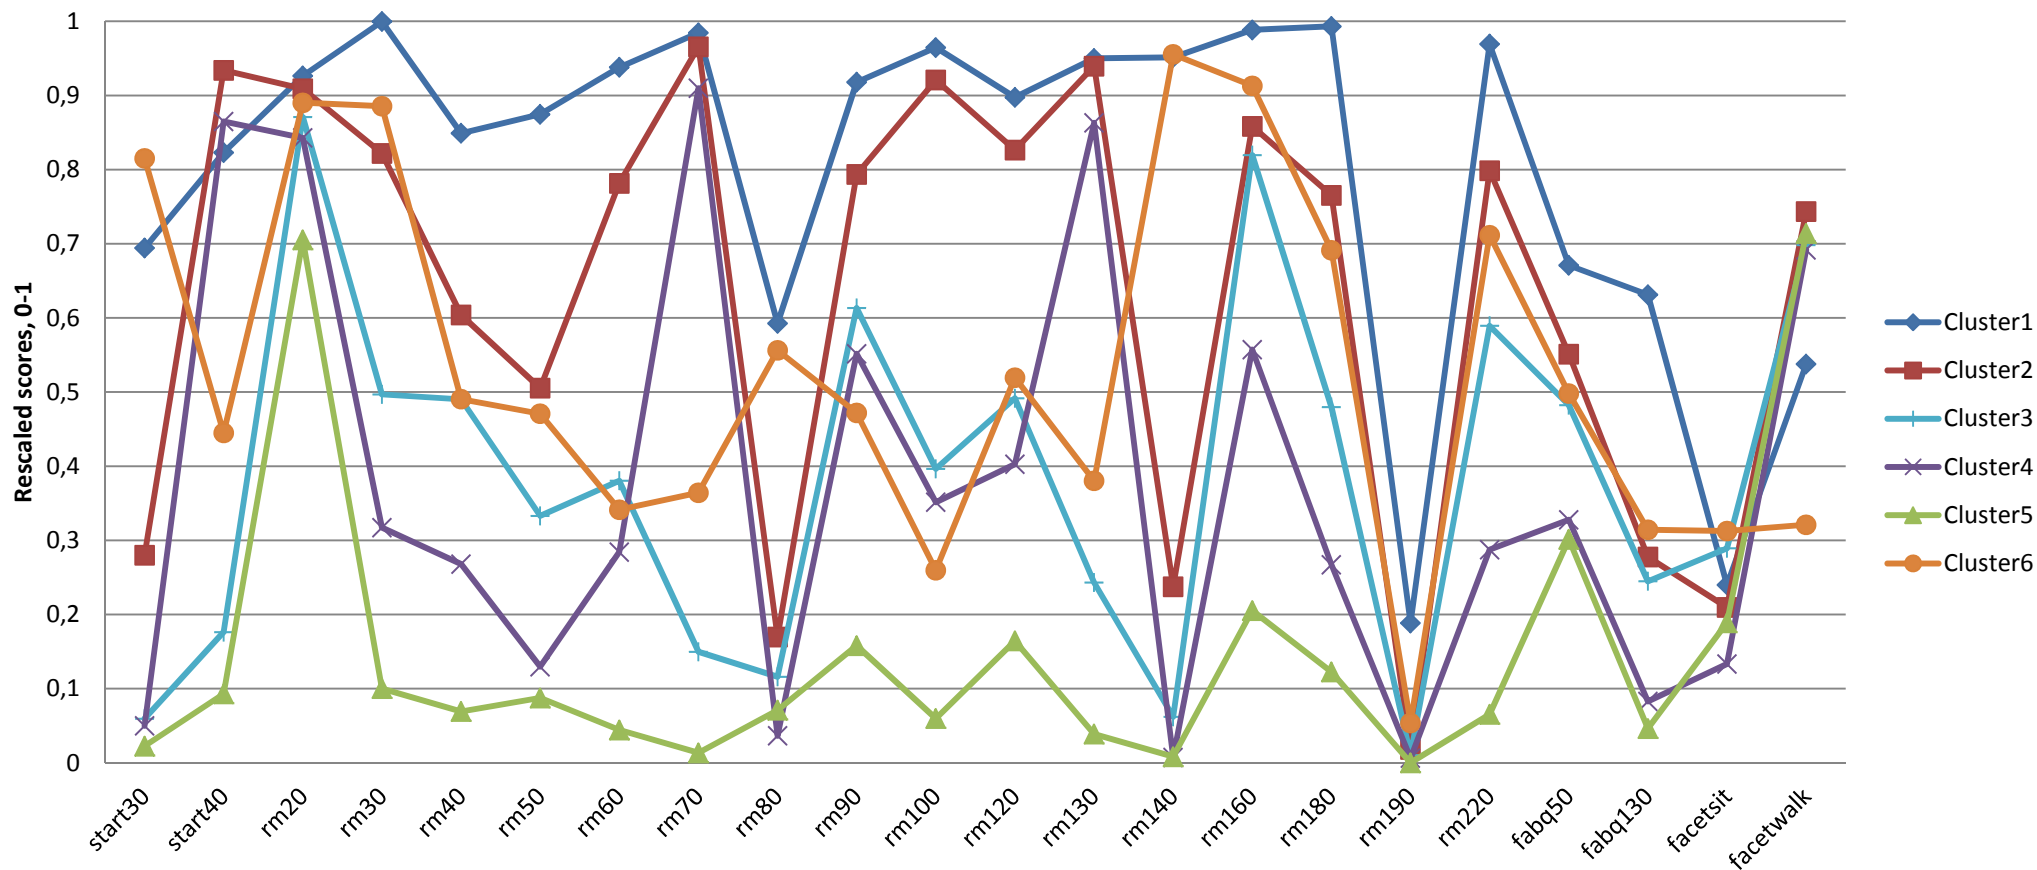

### Activity domain, single-item strategy, 7-domain profiles

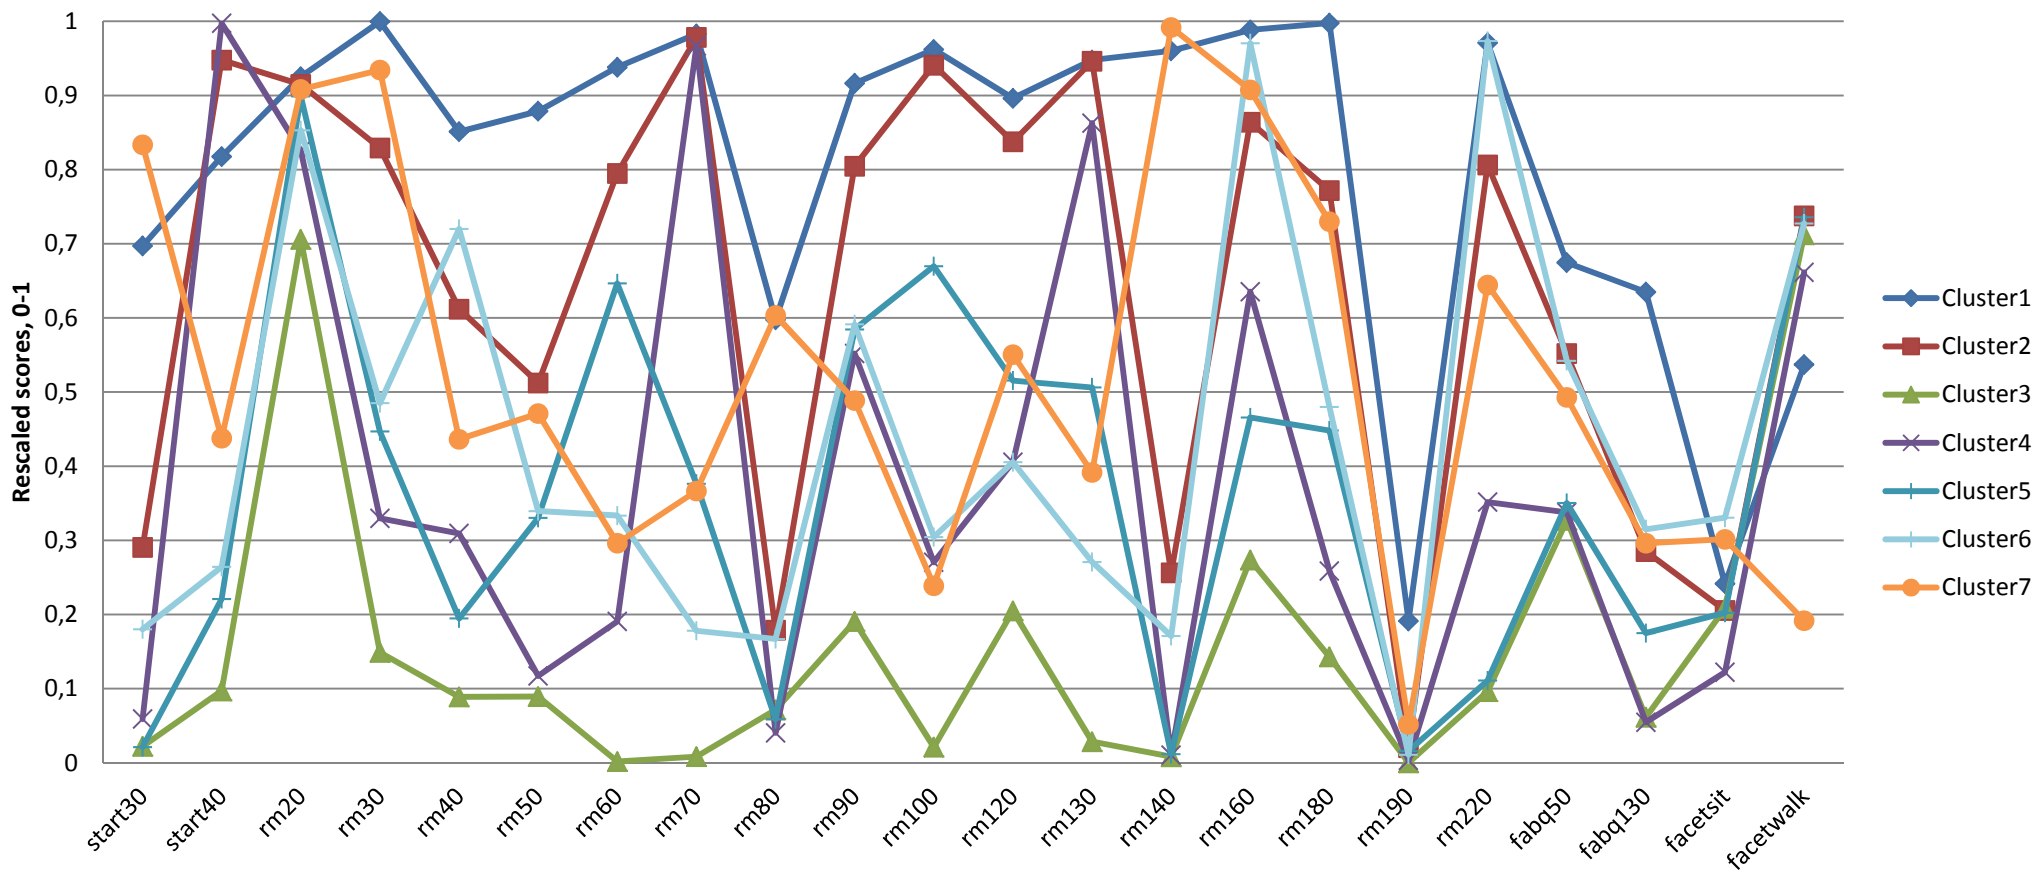

## Participation domain – single-item strategy

**Profile-plots:** Results (models) with 2 to 8 domain profiles based on the following variables:

|         |                                                                                                        |
|---------|--------------------------------------------------------------------------------------------------------|
| Bfbe0   | Physical load at work (1=sitting, 2=sitting and walking, 3=light physical load, 4=heavy physical load) |
| Dlsy0   | Days with sick leave the last month (0, 1-5, 6-31)                                                     |
| Rm10    | I stay at home most of the time because of my back problem or leg pain (sciatica) (N/Y)                |
| Rm200   | Because of my back problem, my sexual activity is decreased (N/Y)                                      |
| Fabq60  | My pain was caused by my work or by an accident at work (0=disagree, 1=don't know, 2=agree) My work    |
| Fabq70  | aggravated my pain (0=disagree, 1=don't know, 2=agree)                                                 |
| Fabq90  | My work is too heavy for me (0=disagree, 1=don't know, 2=agree)                                        |
| Fabq100 | My work makes or would make my pain worse (0=disagree, 1=don't know, 2=agree)                          |

### AMN's suggestion on final model: 6 domain profiles (clusters)

Cluster 1: Low physical workload and very low participation limitation

Cluster 2: Moderate physical workload, low participation limitation, often stay at home and often decreased sexual activity

Cluster 3: Low physical workload, moderate participation limitation because work often aggravated the pain despite low physical workload, work is not too heavy

Cluster 4: High physical workload and pain often caused/aggravated by work, which is too heavy. Seldom sick leave or decreased sexual activity

Cluster 5: Very high physical workload and high participation limitation (work, sexual activity, sick leave), pain caused and aggravated by work

Cluster 6: Moderate physical workload, very low participation limitation, pain caused and aggravated by work, but the moderate physical workload will not make pain worse now

### Facts:

Lowest cluster size = 8.26%

The seed used was based on the BIC appearing 6 out of 10 rounds within the statistical analysis finding 6-cluster models.

Participation domain, single-item strategy, 2-domain profiles

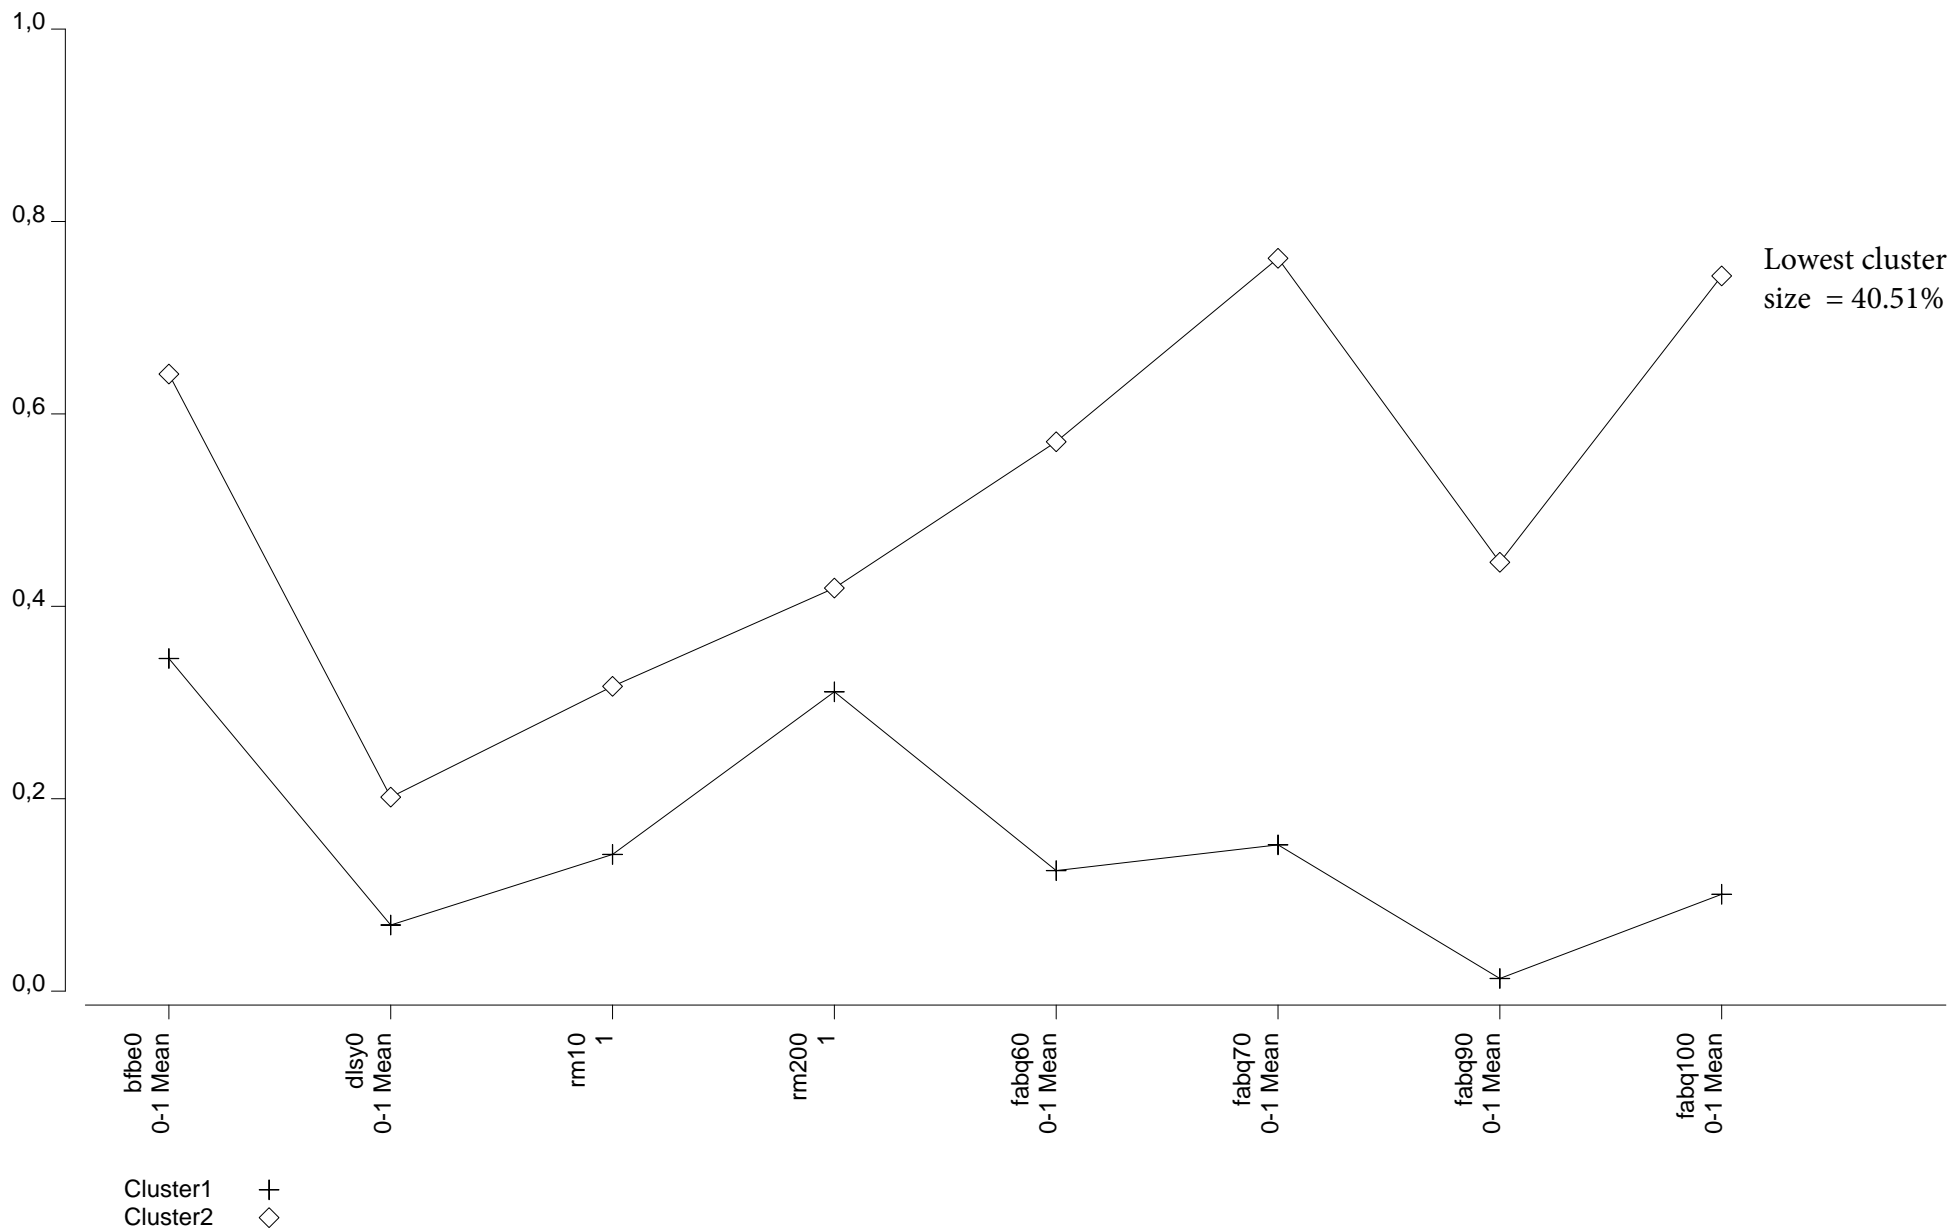

Participation domain, single-item strategy, 3-domain profiles

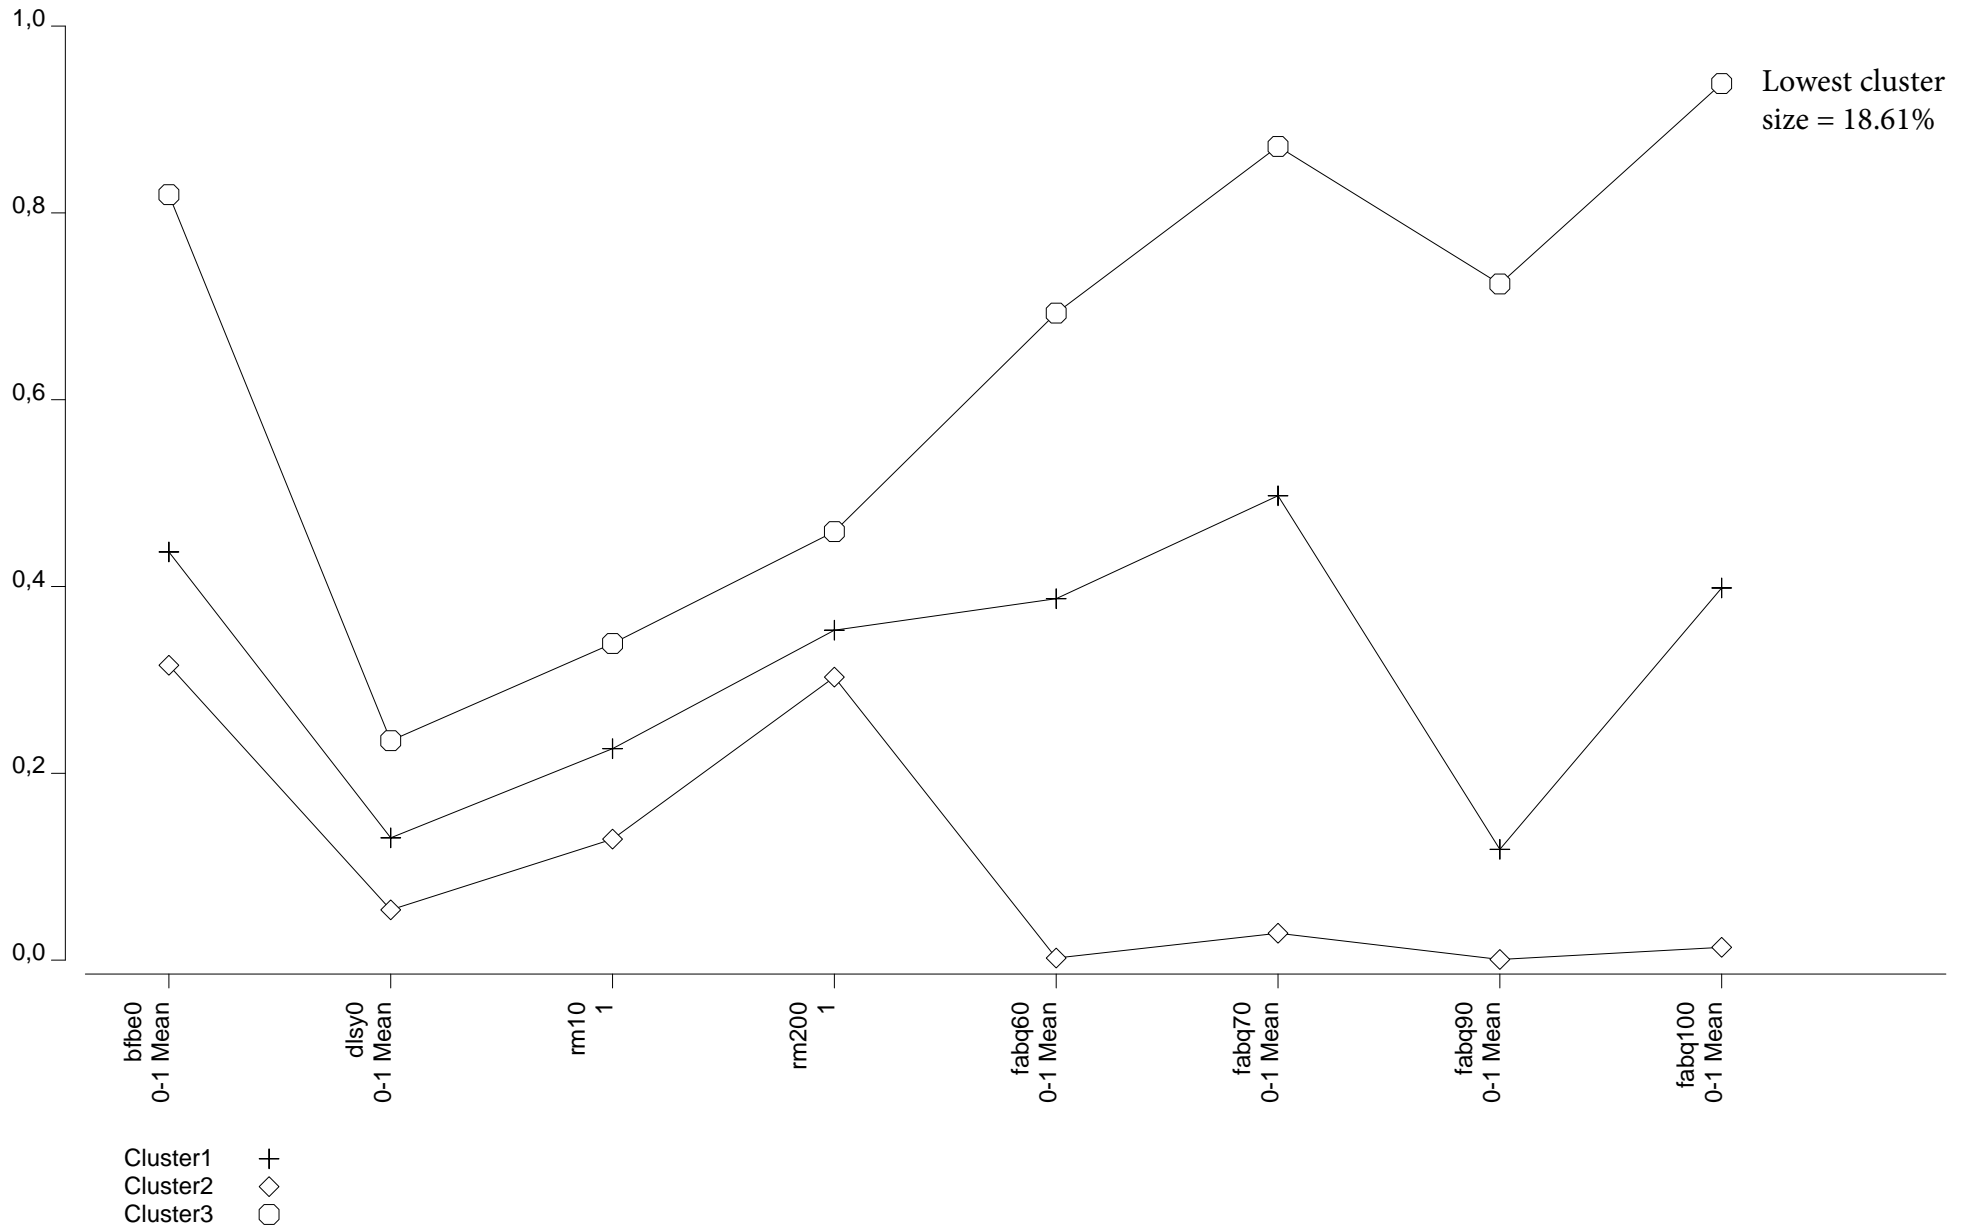

Participation domain, single-item strategy, 4-domain profiles

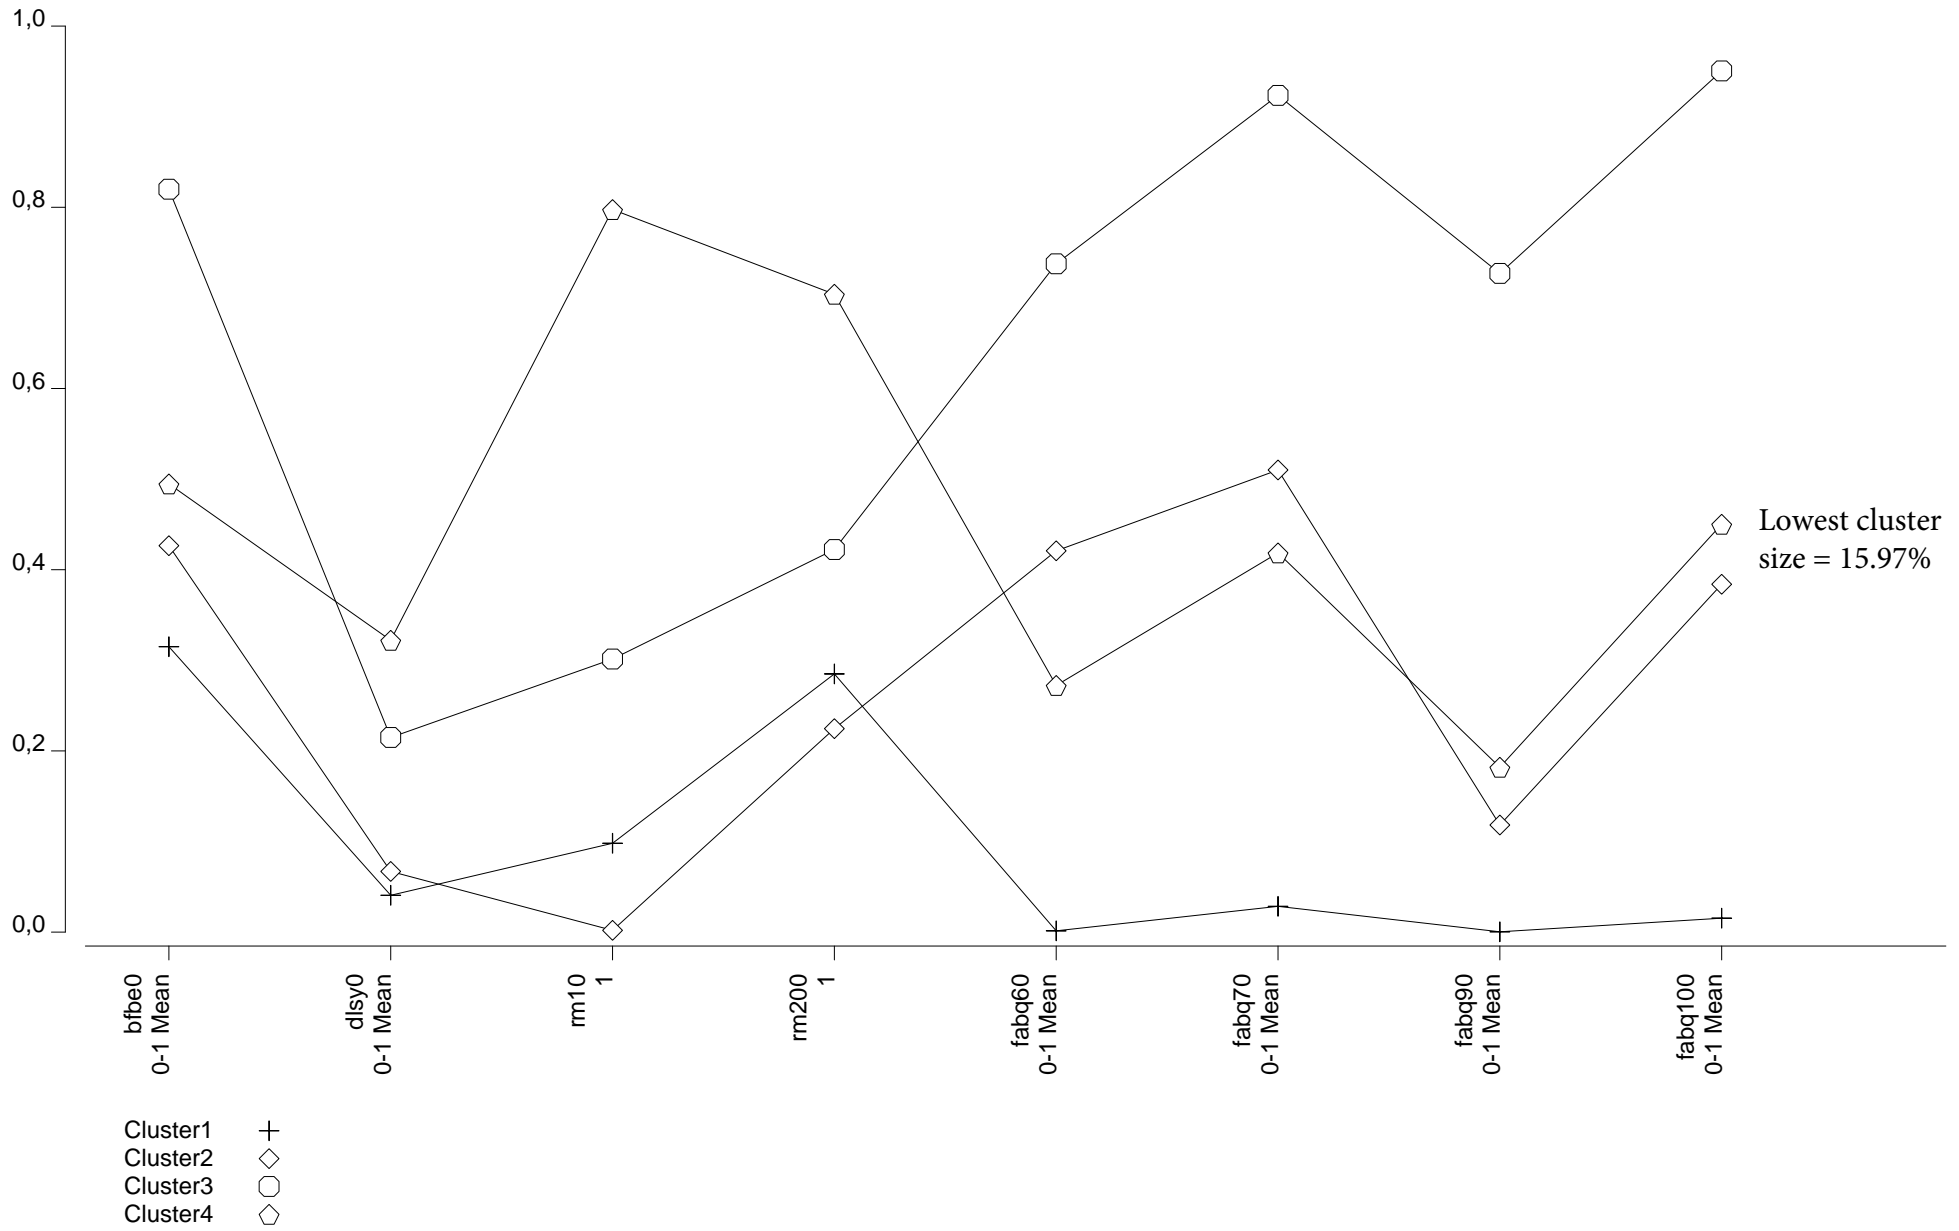



Participation domain, single-item strategy, 5-domain profiles

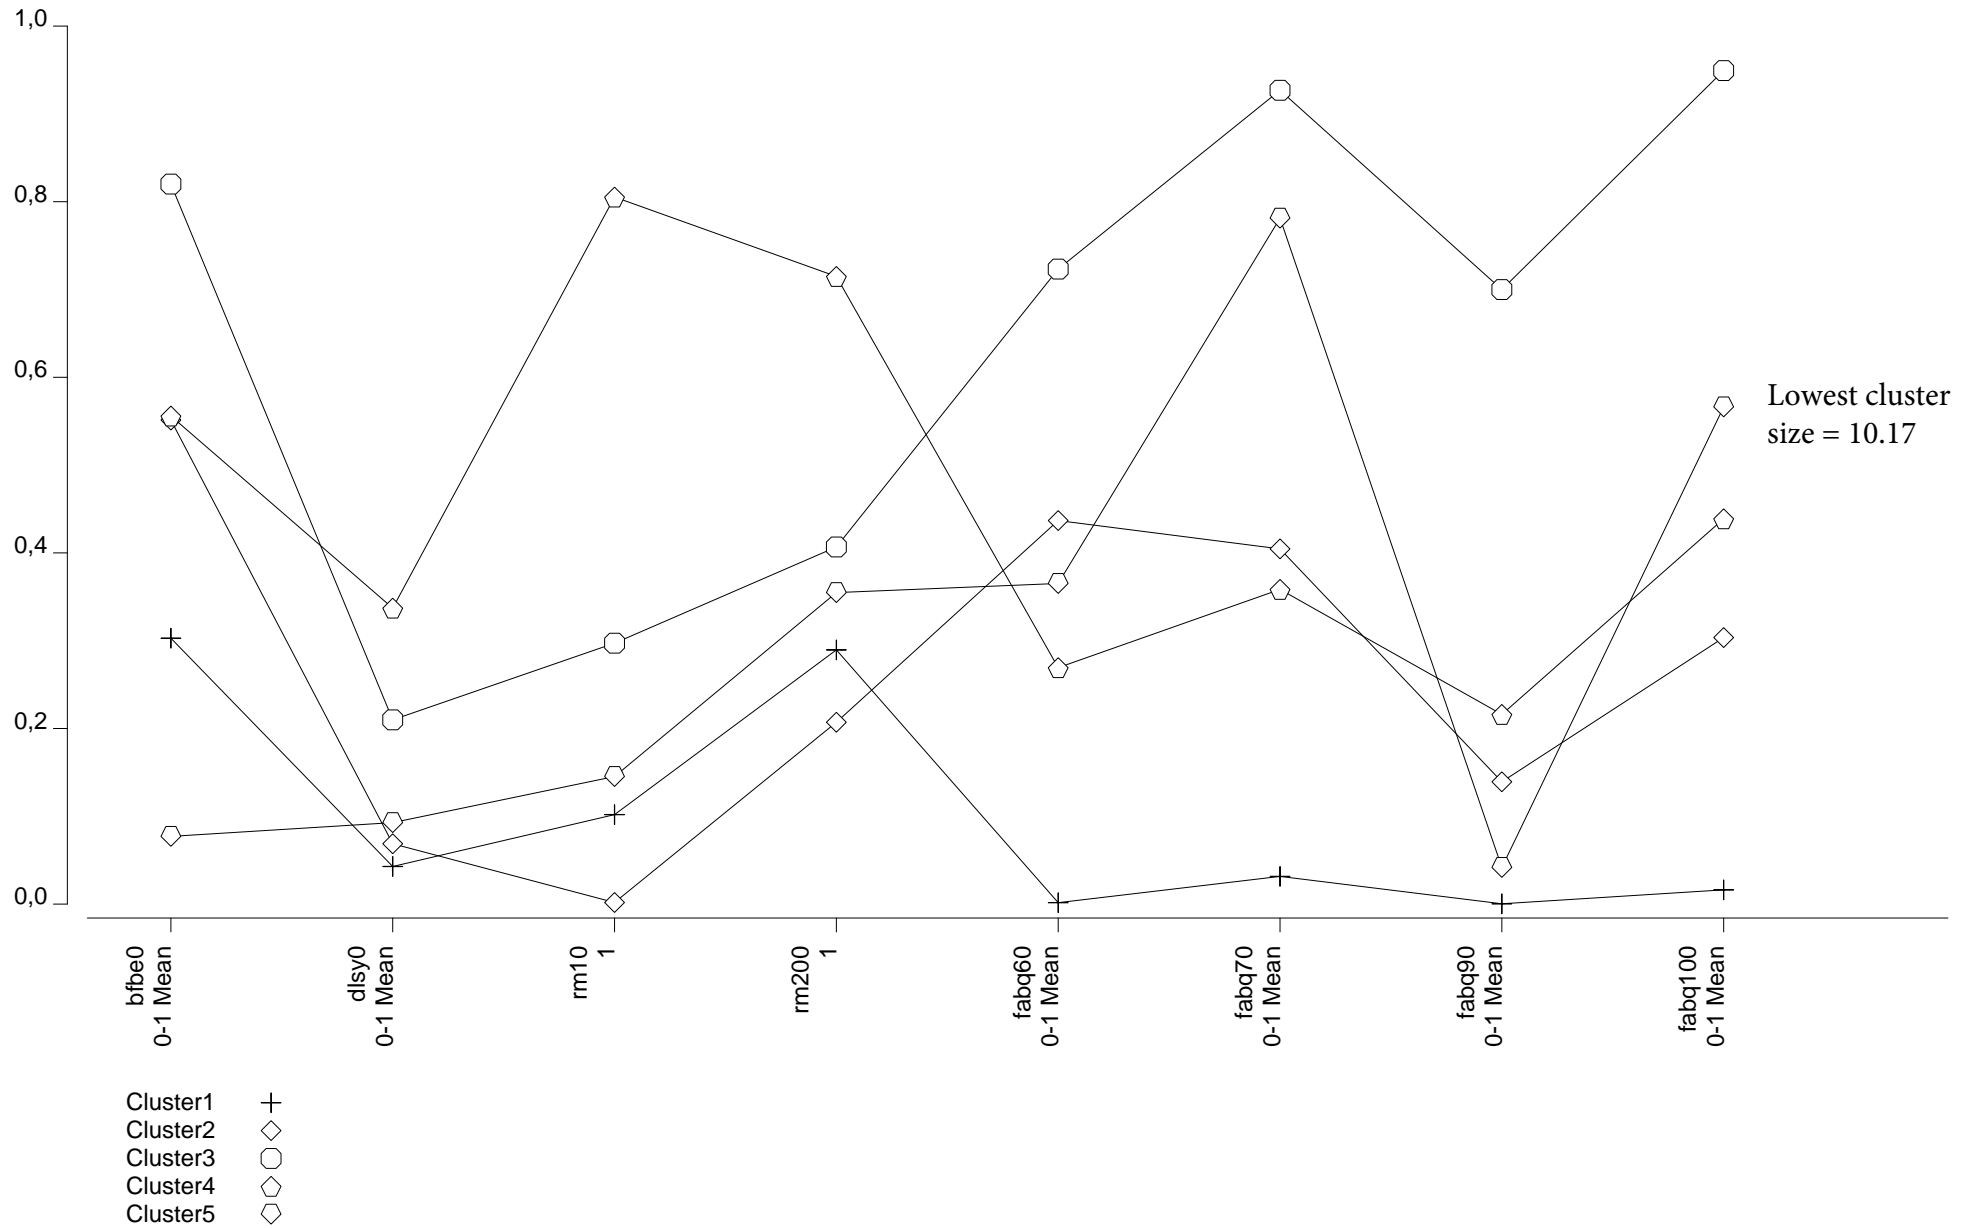

Participation domain, single-item, 6-domain profiles

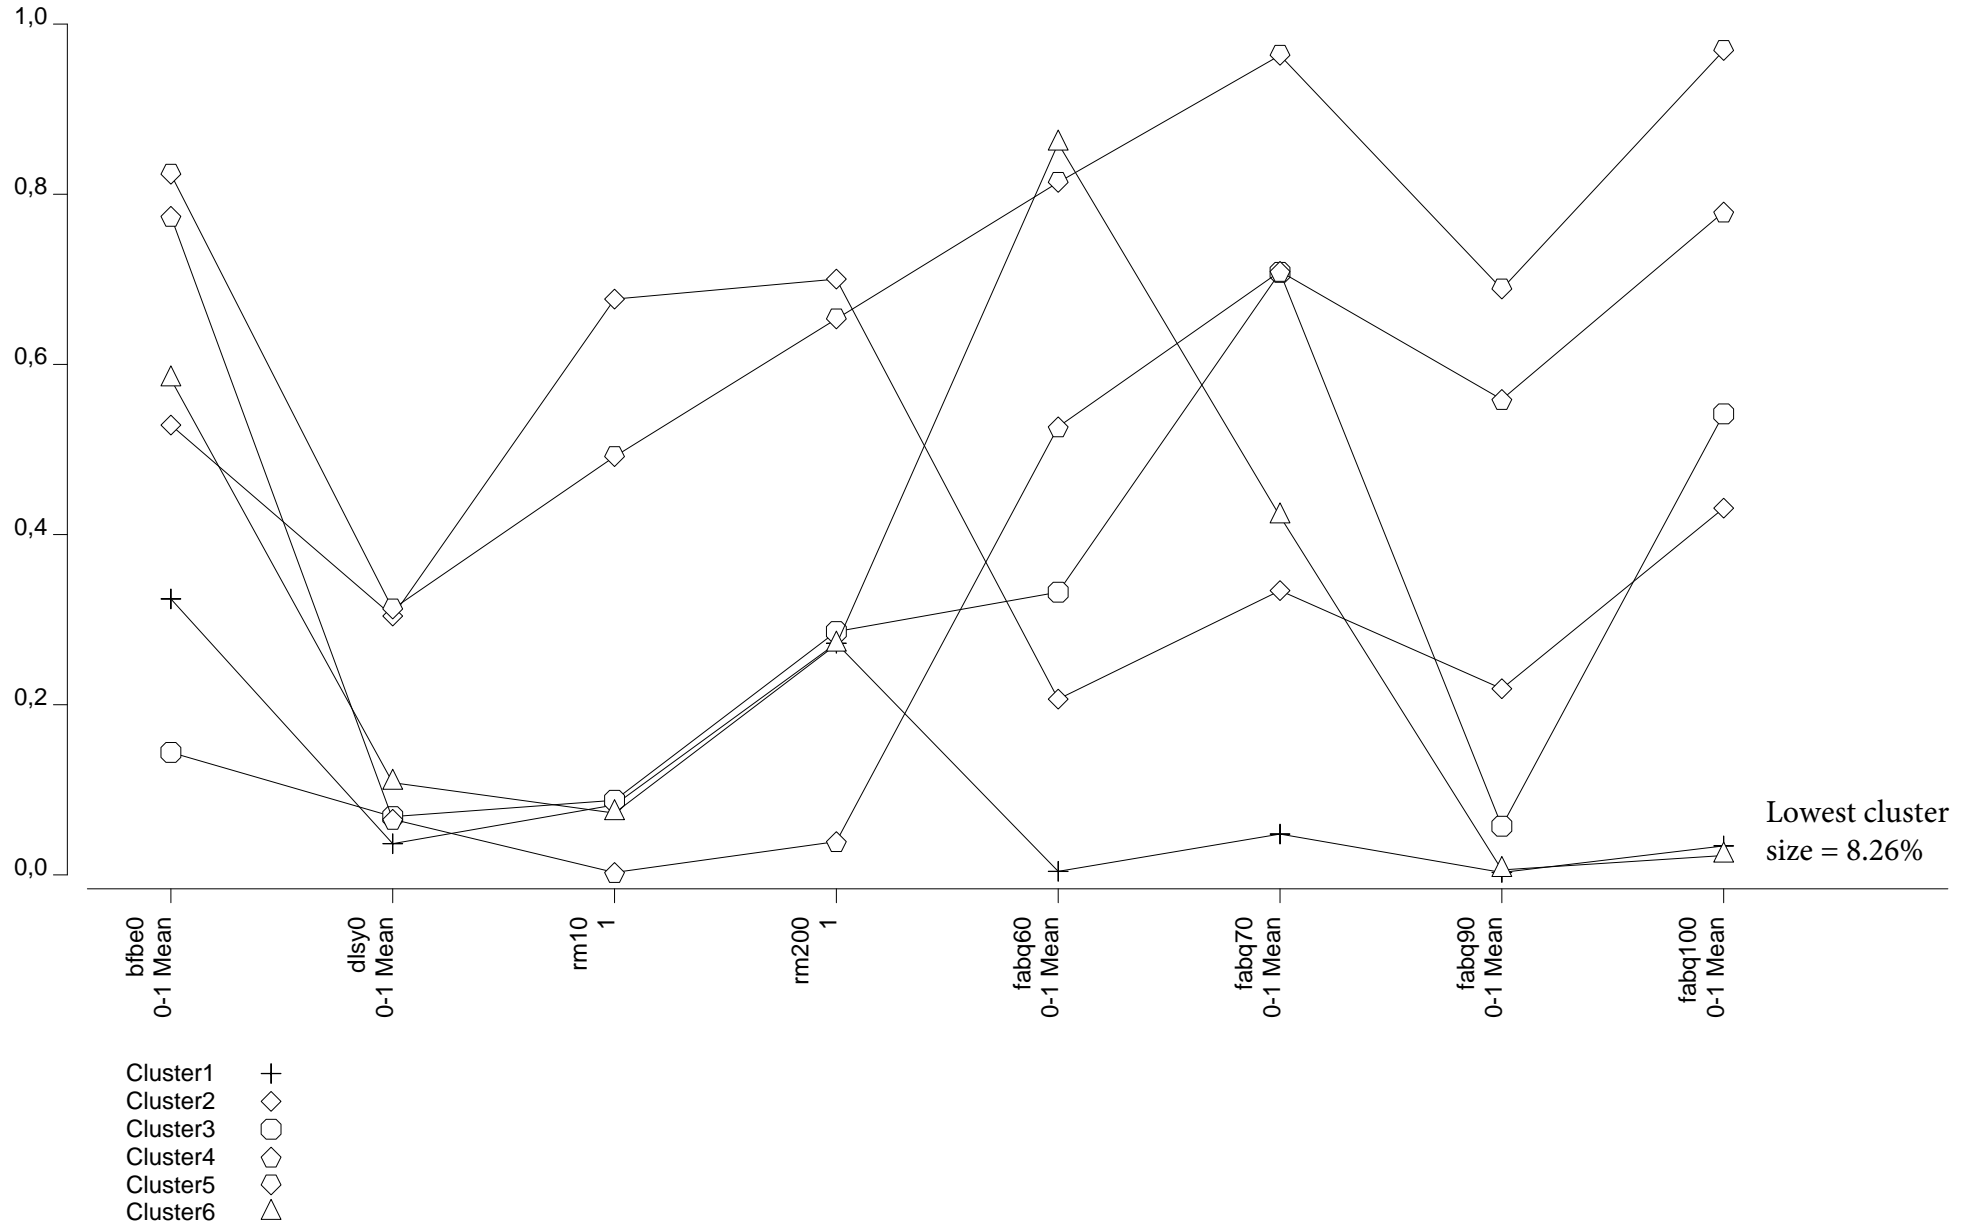

Participation domain, single-item, 7-domain profiles

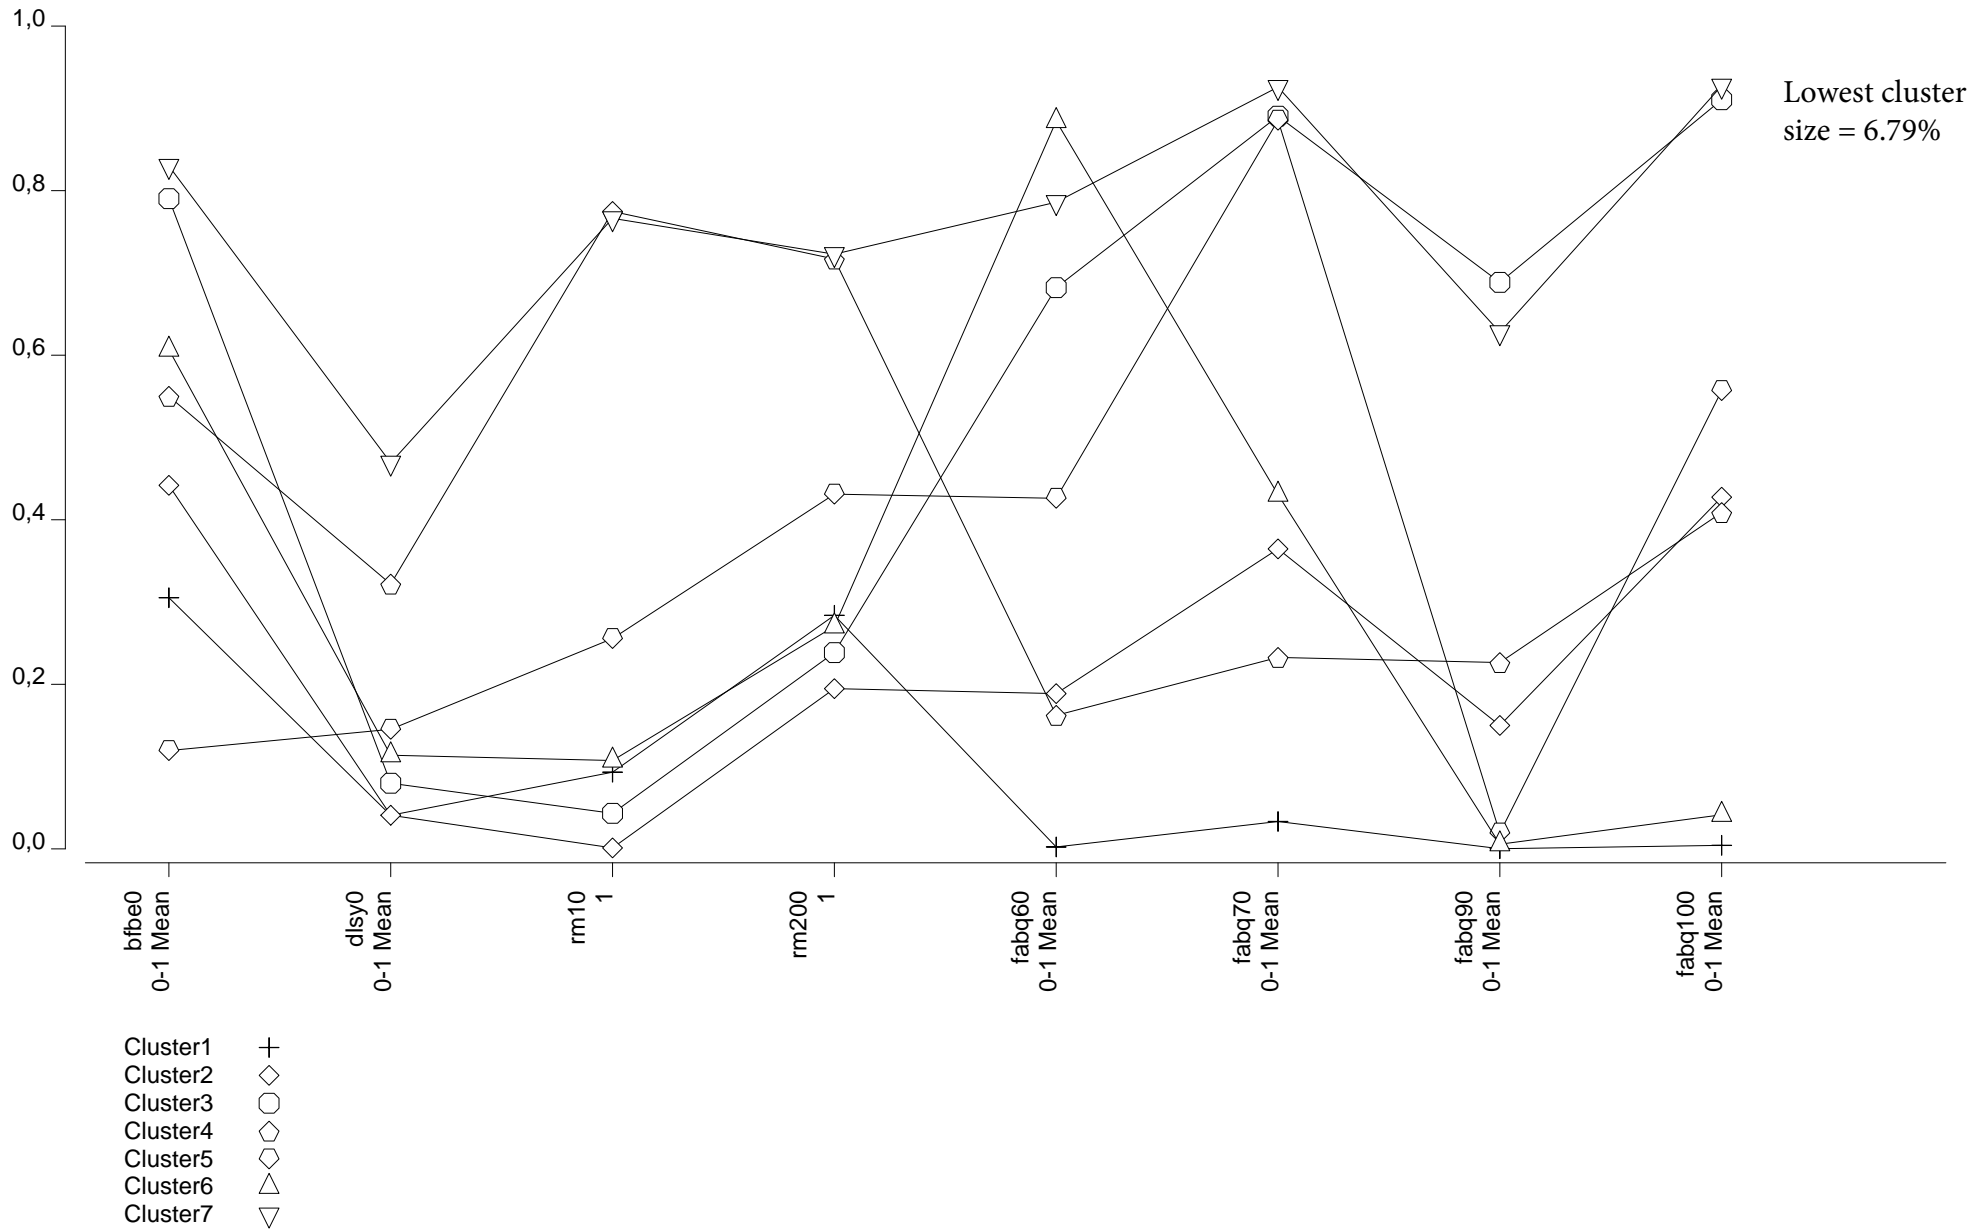

# Participation domain, single-item, 8-domain profiles

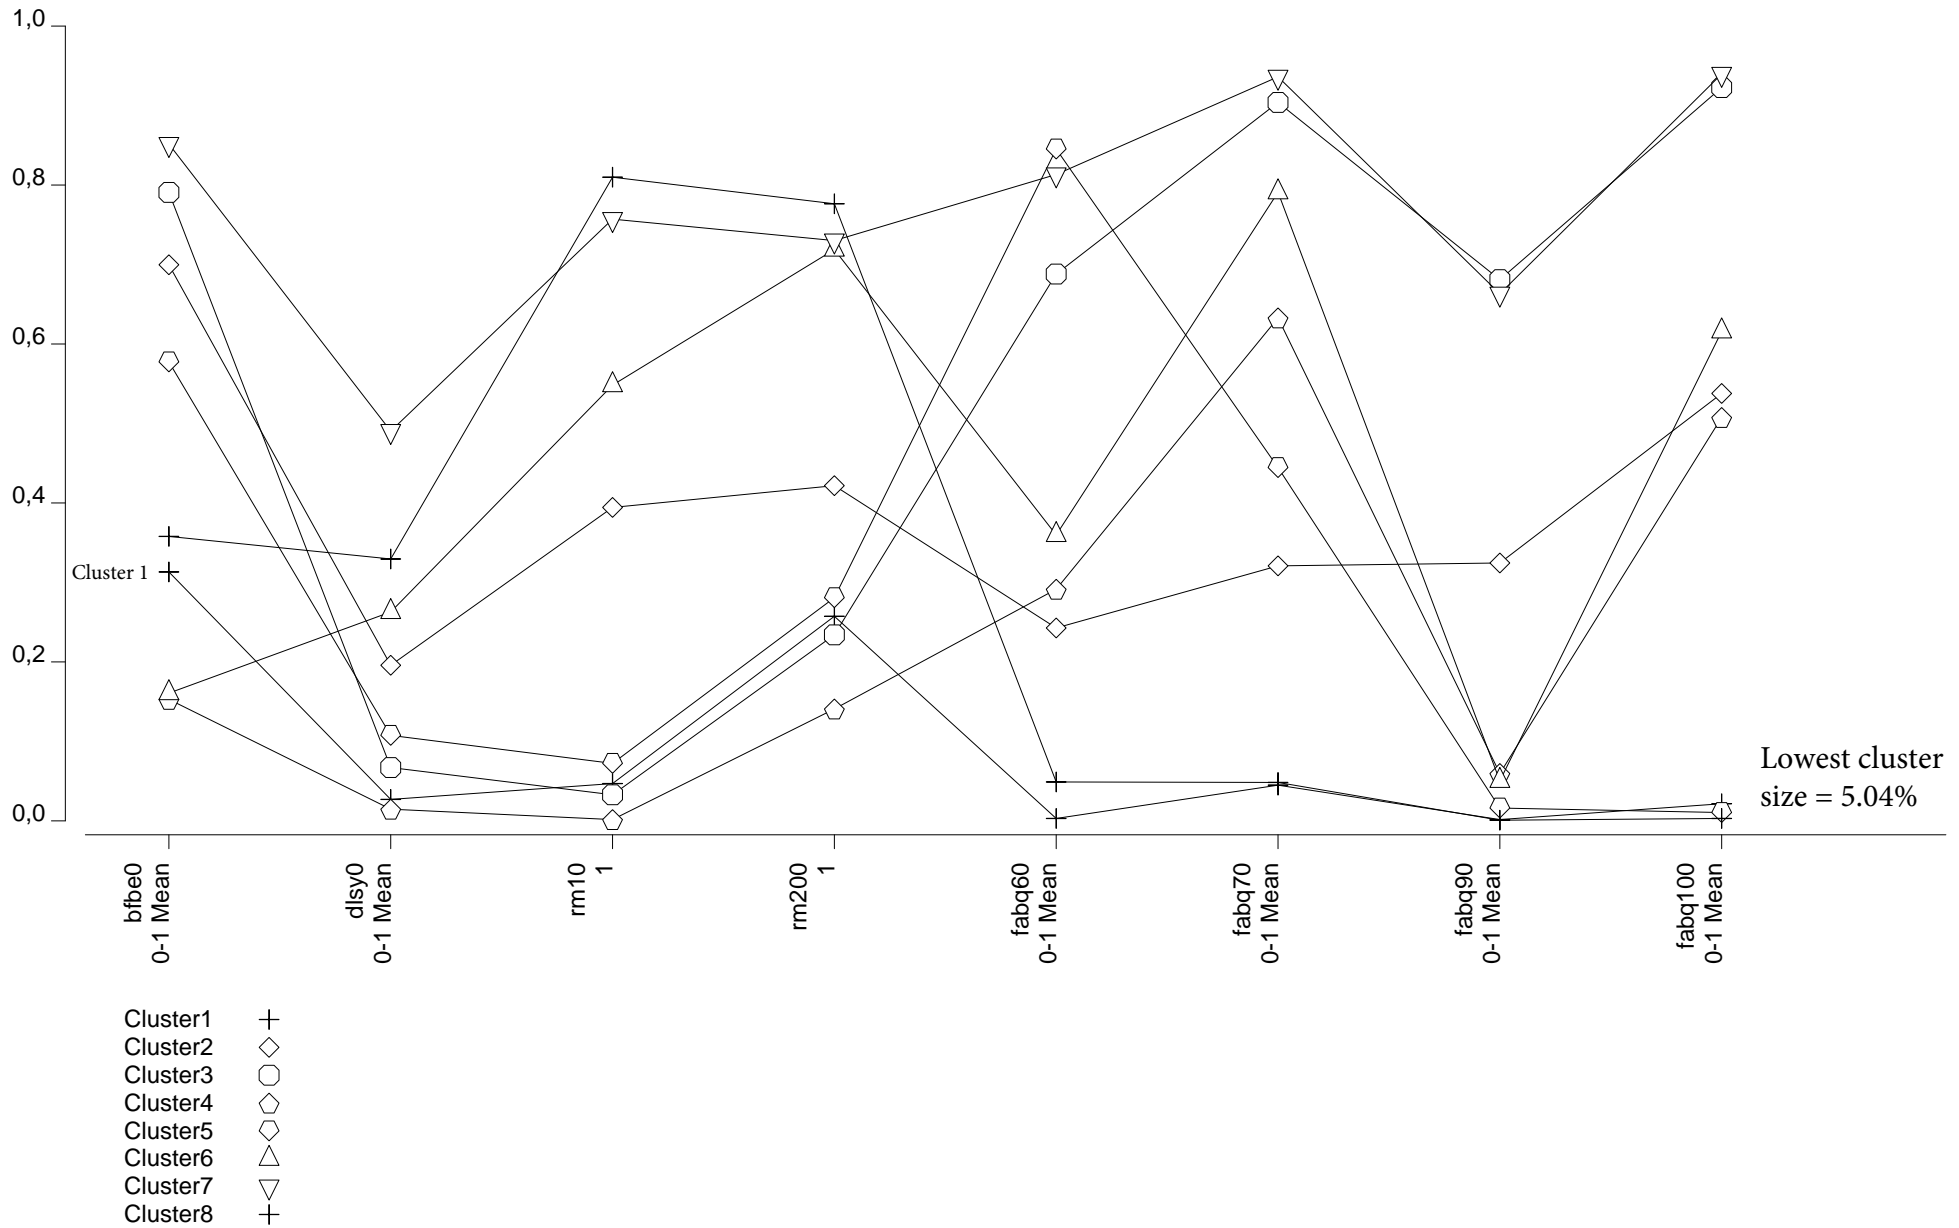

**Profiles in numbers – participation domain, single-item strategy, 4-domain profiles:**

The first row of numbers shows how large each cluster is. The body of the table contains (marginal) conditional probabilities that show how the clusters are related to the Nominal or Ordinal indicator variables. These probabilities sum to 1 within each cluster (column).

For indicators specified as Continuous, the body of the table contains means instead of probabilities. For indicators specified as Ordinal, means are displayed in addition to the conditional probabilities.

| <b>4-DP, single, part</b> | Cluster1 | s.e.   | Cluster2 | s.e.   | Cluster3 | s.e.   | Cluster4 | s.e.   |
|---------------------------|----------|--------|----------|--------|----------|--------|----------|--------|
| Cluster Size              | 34,34%   | 0,023  | 32,87%   | 0,0269 | 16,82%   | 0,0188 | 15,97%   | 0,0221 |
| <b>Indicators</b>         |          |        |          |        |          |        |          |        |
| bfbe0                     |          |        |          |        |          |        |          |        |
| 1                         | 0,3634   | 0,0265 | 0,242    | 0,0246 | 0,0201   | 0,0085 | 0,1832   | 0,0309 |
| 2                         | 0,404    | 0,0184 | 0,3885   | 0,0191 | 0,1184   | 0,0283 | 0,3598   | 0,0242 |
| 3                         | 0,157    | 0,0151 | 0,2179   | 0,0174 | 0,243    | 0,0215 | 0,2469   | 0,0209 |
| 4                         | 0,0756   | 0,013  | 0,1516   | 0,0213 | 0,6185   | 0,0517 | 0,2101   | 0,036  |
| Mean                      | 1,9448   | 0,0585 | 2,279    | 0,0713 | 3,4599   | 0,0951 | 2,484    | 0,1115 |
| dlsy0                     |          |        |          |        |          |        |          |        |
| 0                         | 0,9202   | 0,0208 | 0,8701   | 0,0281 | 0,6124   | 0,0471 | 0,4526   | 0,0517 |
| 1                         | 0,0784   | 0,02   | 0,126    | 0,0263 | 0,3456   | 0,0384 | 0,4507   | 0,0414 |
| 2                         | 0,0014   | 0,0009 | 0,0039   | 0,0022 | 0,042    | 0,0144 | 0,0967   | 0,0244 |
| Mean                      | 0,0813   | 0,0216 | 0,1338   | 0,03   | 0,4296   | 0,0581 | 0,644    | 0,0695 |
| rm10                      |          |        |          |        |          |        |          |        |
| 0                         | 0,902    | 0,0252 | 0,9982   | 0,0077 | 0,6987   | 0,047  | 0,2026   | 0,0867 |
| 1                         | 0,098    | 0,0252 | 0,0018   | 0,0077 | 0,3013   | 0,047  | 0,7974   | 0,0867 |
| rm200                     |          |        |          |        |          |        |          |        |
| 0                         | 0,7152   | 0,0301 | 0,7756   | 0,0351 | 0,5779   | 0,0477 | 0,2959   | 0,0479 |
| 1                         | 0,2848   | 0,0301 | 0,2244   | 0,0351 | 0,4221   | 0,0477 | 0,7041   | 0,0479 |
| fabq60                    |          |        |          |        |          |        |          |        |
| 0                         | 0,9973   | 0,0064 | 0,4705   | 0,0391 | 0,1688   | 0,035  | 0,6328   | 0,0541 |
| 1                         | 0,0027   | 0,0063 | 0,2174   | 0,0192 | 0,1871   | 0,0186 | 0,19     | 0,0203 |
| 2                         | 0        | 0,0001 | 0,3121   | 0,0339 | 0,644    | 0,0456 | 0,1772   | 0,0412 |
| Mean                      | 0,0027   | 0,0065 | 0,8416   | 0,0706 | 1,4752   | 0,0791 | 0,5444   | 0,094  |
| fabq70                    |          |        |          |        |          |        |          |        |
| 0                         | 0,9459   | 0,0233 | 0,3203   | 0,0356 | 0,0161   | 0,0099 | 0,4152   | 0,0578 |

|         |        |        |        |        |        |        |        |        |
|---------|--------|--------|--------|--------|--------|--------|--------|--------|
| 1       | 0,0514 | 0,0209 | 0,3394 | 0,0246 | 0,1211 | 0,0316 | 0,3326 | 0,0253 |
| 2       | 0,0026 | 0,0024 | 0,3404 | 0,0356 | 0,8629 | 0,041  | 0,2522 | 0,0496 |
| Mean    | 0,0567 | 0,0256 | 1,0201 | 0,0668 | 1,8468 | 0,0506 | 0,8369 | 0,1047 |
| fabq90  |        |        |        |        |        |        |        |        |
| 0       | 0,9993 | 0,0022 | 0,83   | 0,0292 | 0,1946 | 0,0465 | 0,7526 | 0,0476 |
| 1       | 0,0007 | 0,0022 | 0,1037 | 0,0155 | 0,1569 | 0,0202 | 0,1308 | 0,0204 |
| 2       | 0      | 0      | 0,0663 | 0,0185 | 0,6485 | 0,0548 | 0,1165 | 0,0338 |
| Mean    | 0,0007 | 0,0022 | 0,2363 | 0,0464 | 1,4539 | 0,0996 | 0,3639 | 0,08   |
| fabq100 |        |        |        |        |        |        |        |        |
| 0       | 0,9705 | 0,0226 | 0,4637 | 0,0383 | 0,0086 | 0,0064 | 0,3923 | 0,0599 |
| 1       | 0,0285 | 0,0211 | 0,305  | 0,0254 | 0,0822 | 0,0276 | 0,3153 | 0,0268 |
| 2       | 0,001  | 0,0015 | 0,2314 | 0,0335 | 0,9093 | 0,0338 | 0,2924 | 0,0544 |
| Mean    | 0,0305 | 0,0242 | 0,7677 | 0,0673 | 1,9007 | 0,04   | 0,9001 | 0,1112 |

| Loadings – part. domain, single-item, 4-DP | Clusters | R <sup>2</sup> | Loadings                                                                                                                                                                                                                                                                                                                                       |
|--------------------------------------------|----------|----------------|------------------------------------------------------------------------------------------------------------------------------------------------------------------------------------------------------------------------------------------------------------------------------------------------------------------------------------------------|
| bfbe0                                      | 0,4831   | 0,2334         | <p>The quantities reported under Clusters are simply correlations, representing the square root of the corresponding 'R2' or communality of the associated indicator.</p> <p>Correlations: These are standardised values for the loadings reported in the Loadings output. They represent correlations between the indicators and factors.</p> |
| dlsy0                                      | 0,4352   | 0,1894         |                                                                                                                                                                                                                                                                                                                                                |
| rm10                                       | 0,6699   | 0,4488         |                                                                                                                                                                                                                                                                                                                                                |
| rm200                                      | 0,3466   | 0,1201         |                                                                                                                                                                                                                                                                                                                                                |
| fabq60                                     | 0,6152   | 0,3785         |                                                                                                                                                                                                                                                                                                                                                |
| fabq70                                     | 0,718    | 0,5155         |                                                                                                                                                                                                                                                                                                                                                |
| fabq90                                     | 0,6841   | 0,468          |                                                                                                                                                                                                                                                                                                                                                |
| fabq100                                    | 0,7332   | 0,5376         |                                                                                                                                                                                                                                                                                                                                                |

**Profiles in numbers – participation domain, single-item strategy, 5-domain profiles:**

The first row of numbers shows how large each cluster is. The body of the table contains (marginal) conditional probabilities that show how the clusters are related to the Nominal or Ordinal indicator variables. These probabilities sum to 1 within each cluster (column).

For indicators specified as Continuous, the body of the table contains means instead of probabilities.

For indicators specified as Ordinal, means are displayed in addition to the conditional probabilities.

| <b>5-DP, single, part</b> | Cluster1 | s.e.   | <b>Cluster2</b> | s.e.   | Cluster3 | s.e.   | Cluster4 | s.e.   | <b>Cluster5</b> | s.e.   |
|---------------------------|----------|--------|-----------------|--------|----------|--------|----------|--------|-----------------|--------|
| Cluster Size              | 34,72%   | 0,0237 | 23,86%          | 0,0362 | 17,69%   | 0,0186 | 13,56%   | 0,0235 | 10,17%          | 0,0272 |
| <b>Indicators</b>         |          |        |                 |        |          |        |          |        |                 |        |
| bfbe0                     |          |        |                 |        |          |        |          |        |                 |        |
| 1                         | 0,3347   | 0,0288 | <b>0,106</b>    | 0,032  | 0,0123   | 0,0056 | 0,1033   | 0,0362 | <b>0,7821</b>   | 0,1344 |
| 2                         | 0,4708   | 0,0266 | 0,371           | 0,0377 | 0,1208   | 0,0295 | 0,3673   | 0,0466 | 0,2052          | 0,1168 |
| 3                         | 0,1461   | 0,0164 | 0,2866          | 0,0272 | 0,2616   | 0,0227 | 0,288    | 0,0278 | 0,0119          | 0,0162 |
| 4                         | 0,0484   | 0,0118 | 0,2365          | 0,0463 | 0,6052   | 0,0498 | 0,2413   | 0,0599 | 0,0007          | 0,0016 |
| Mean                      | 1,9083   | 0,0564 | 2,6536          | 0,1377 | 3,4597   | 0,0878 | 2,6673   | 0,1703 | 1,2312          | 0,1536 |
| dlsy0                     |          |        |                 |        |          |        |          |        |                 |        |
| 0                         | 0,9163   | 0,0223 | 0,8669          | 0,0347 | 0,6215   | 0,0456 | 0,434    | 0,0577 | 0,8226          | 0,0809 |
| 1                         | 0,0821   | 0,0213 | 0,1288          | 0,0324 | 0,3375   | 0,0374 | 0,4579   | 0,0443 | 0,1696          | 0,073  |
| 2                         | 0,0016   | 0,0011 | 0,0043          | 0,0027 | 0,041    | 0,0141 | 0,108    | 0,0284 | 0,0078          | 0,0082 |
| Mean                      | 0,0854   | 0,0232 | 0,1374          | 0,0371 | 0,4195   | 0,0562 | 0,674    | 0,0794 | 0,1853          | 0,0888 |
| rm10                      |          |        |                 |        |          |        |          |        |                 |        |
| 0                         | 0,8981   | 0,0269 | 0,9983          | 0,0083 | 0,703    | 0,0461 | 0,1948   | 0,0836 | 0,8547          | 0,0915 |
| 1                         | 0,1019   | 0,0269 | 0,0017          | 0,0083 | 0,297    | 0,0461 | 0,8052   | 0,0836 | 0,1453          | 0,0915 |
| rm200                     |          |        |                 |        |          |        |          |        |                 |        |
| 0                         | 0,7106   | 0,0309 | 0,7931          | 0,0434 | 0,5934   | 0,0461 | 0,2853   | 0,0532 | 0,6453          | 0,0909 |
| 1                         | 0,2894   | 0,0309 | 0,2069          | 0,0434 | 0,4066   | 0,0461 | 0,7147   | 0,0532 | 0,3547          | 0,0909 |
| fabq60                    |          |        |                 |        |          |        |          |        |                 |        |
| 0                         | 0,9968   | 0,0073 | 0,4538          | 0,0564 | 0,1811   | 0,0341 | 0,6362   | 0,0648 | 0,5295          | 0,0699 |
| 1                         | 0,0032   | 0,0071 | 0,2188          | 0,0197 | 0,1914   | 0,0185 | 0,1892   | 0,0223 | 0,2106          | 0,0203 |
| 2                         | 0        | 0,0001 | 0,3274          | 0,0499 | 0,6275   | 0,0437 | 0,1746   | 0,0489 | 0,2599          | 0,0602 |
| Mean                      | 0,0032   | 0,0074 | 0,8735          | 0,1046 | 1,4465   | 0,0762 | 0,5385   | 0,1127 | 0,7303          | 0,1289 |
| fabq70                    |          |        |                 |        |          |        |          |        |                 |        |
| 0                         | 0,9398   | 0,0236 | <b>0,4149</b>   | 0,0516 | 0,0122   | 0,008  | 0,4676   | 0,0871 | 0,0824          | 0,0493 |

|         |        |        |        |        |        |        |        |        |        |        |
|---------|--------|--------|--------|--------|--------|--------|--------|--------|--------|--------|
| 1       | 0,0577 | 0,0215 | 0,3612 | 0,031  | 0,122  | 0,0325 | 0,348  | 0,0326 | 0,273  | 0,0516 |
| 2       | 0,0025 | 0,0022 | 0,2239 | 0,0461 | 0,8657 | 0,0398 | 0,1844 | 0,0699 | 0,6446 | 0,0969 |
| Mean    | 0,0627 | 0,0257 | 0,809  | 0,0929 | 1,8535 | 0,0473 | 0,7168 | 0,1545 | 1,5623 | 0,1449 |
| fabq90  |        |        |        |        |        |        |        |        |        |        |
| 0       | 0,9994 | 0,002  | 0,8032 | 0,0392 | 0,2178 | 0,0434 | 0,7119 | 0,0605 | 0,9317 | 0,0517 |
| 1       | 0,0006 | 0,002  | 0,1152 | 0,0191 | 0,165  | 0,0209 | 0,1441 | 0,0235 | 0,0533 | 0,0323 |
| 2       | 0      | 0      | 0,0816 | 0,025  | 0,6172 | 0,0502 | 0,144  | 0,0442 | 0,015  | 0,0198 |
| Mean    | 0,0006 | 0,002  | 0,2784 | 0,0629 | 1,3995 | 0,0915 | 0,4321 | 0,1034 | 0,0834 | 0,0714 |
| fabq100 |        |        |        |        |        |        |        |        |        |        |
| 0       | 0,9686 | 0,0226 | 0,5493 | 0,0526 | 0,008  | 0,0062 | 0,3958 | 0,0728 | 0,2688 | 0,0664 |
| 1       | 0,0304 | 0,0212 | 0,2945 | 0,0277 | 0,0855 | 0,0294 | 0,3308 | 0,03   | 0,3301 | 0,0288 |
| 2       | 0,0009 | 0,0014 | 0,1562 | 0,0385 | 0,9065 | 0,0353 | 0,2734 | 0,0632 | 0,4011 | 0,0722 |
| Mean    | 0,0323 | 0,024  | 0,6069 | 0,088  | 1,8985 | 0,0412 | 0,8775 | 0,133  | 1,1323 | 0,1357 |

| Loadings – part. domain, single-item, 5-DP | Clusters | R <sup>2</sup> | Loadings                                                                                                                                                                                                                                                                                                                                       |
|--------------------------------------------|----------|----------------|------------------------------------------------------------------------------------------------------------------------------------------------------------------------------------------------------------------------------------------------------------------------------------------------------------------------------------------------|
| bfbe0                                      | 0,626    | 0,3919         | <p>The quantities reported under Clusters are simply correlations, representing the square root of the corresponding 'R2' or communality of the associated indicator.</p> <p>Correlations: These are standardised values for the loadings reported in the Loadings output. They represent correlations between the indicators and factors.</p> |
| dlsy0                                      | 0,4248   | 0,1804         |                                                                                                                                                                                                                                                                                                                                                |
| rm10                                       | 0,6196   | 0,3839         |                                                                                                                                                                                                                                                                                                                                                |
| rm200                                      | 0,3287   | 0,1081         |                                                                                                                                                                                                                                                                                                                                                |
| fabq60                                     | 0,6145   | 0,3776         |                                                                                                                                                                                                                                                                                                                                                |
| fabq70                                     | 0,7669   | 0,5881         |                                                                                                                                                                                                                                                                                                                                                |
| fabq90                                     | 0,6774   | 0,4588         |                                                                                                                                                                                                                                                                                                                                                |
| fabq100                                    | 0,76     | 0,5777         |                                                                                                                                                                                                                                                                                                                                                |



**Profiles in numbers – participation domain, single-item strategy, 6-domain profiles:**

The first row of numbers shows how large each cluster is. The body of the table contains (marginal) conditional probabilities that show how the clusters are related to the Nominal or Ordinal indicator variables. These probabilities sum to 1 within each cluster (column).

For indicators specified as Continuous, the body of the table contains means instead of probabilities.

For indicators specified as Ordinal, means are displayed in addition to the conditional probabilities.

| <b>6-DP, single, part</b> | Cluster1 | s.e.   | Cluster2 | s.e.   | Cluster3 | s.e.   | Cluster4 | s.e.   | Cluster5 | s.e.   | Cluster6 | s.e.   |
|---------------------------|----------|--------|----------|--------|----------|--------|----------|--------|----------|--------|----------|--------|
| Cluster Size              | 38,21%   | 0,0226 | 16,22%   | 0,0313 | 13,83%   | 0,028  | 12,73%   | 0,0197 | 10,75%   | 0,0172 | 8,26%    | 0,0179 |
| <b>Indicators</b>         |          |        |          |        |          |        |          |        |          |        |          |        |
| bfbe0                     |          |        |          |        |          |        |          |        |          |        |          |        |
| 1                         | 0,3126   | 0,0257 | 0,1236   | 0,0374 | 0,6222   | 0,0887 | 0,0217   | 0,011  | 0,0121   | 0,0075 | 0,0922   | 0,0321 |
| 2                         | 0,4616   | 0,0252 | 0,3796   | 0,0362 | 0,3297   | 0,0606 | 0,161    | 0,0451 | 0,1146   | 0,039  | 0,3376   | 0,0476 |
| 3                         | 0,166    | 0,0158 | 0,284    | 0,0292 | 0,0426   | 0,0243 | 0,2909   | 0,0256 | 0,264    | 0,03   | 0,3012   | 0,0263 |
| 4                         | 0,0598   | 0,0124 | 0,2128   | 0,0472 | 0,0055   | 0,0052 | 0,5264   | 0,0717 | 0,6092   | 0,0709 | 0,2691   | 0,0618 |
| Mean                      | 1,973    | 0,0521 | 2,586    | 0,1481 | 1,4313   | 0,1225 | 3,322    | 0,136  | 3,4703   | 0,1231 | 2,7471   | 0,1663 |
| dlsy0                     |          |        |          |        |          |        |          |        |          |        |          |        |
| 0                         | 0,9277   | 0,0193 | 0,4724   | 0,0569 | 0,8669   | 0,0673 | 0,8731   | 0,0495 | 0,4605   | 0,07   | 0,7928   | 0,0605 |
| 1                         | 0,0713   | 0,0187 | 0,447    | 0,0455 | 0,1294   | 0,0633 | 0,1236   | 0,0467 | 0,4542   | 0,0519 | 0,1978   | 0,0547 |
| 2                         | 0,001    | 0,0007 | 0,0806   | 0,0232 | 0,0037   | 0,0042 | 0,0033   | 0,003  | 0,0854   | 0,0286 | 0,0094   | 0,0065 |
| Mean                      | 0,0734   | 0,0199 | 0,6082   | 0,0741 | 0,1368   | 0,0713 | 0,1302   | 0,0523 | 0,6249   | 0,0935 | 0,2166   | 0,0664 |
| rm10                      |          |        |          |        |          |        |          |        |          |        |          |        |
| 0                         | 0,9179   | 0,023  | 0,3234   | 0,0722 | 0,9123   | 0,0781 | 0,9972   | 0,0145 | 0,5085   | 0,0779 | 0,9275   | 0,0671 |
| 1                         | 0,0821   | 0,023  | 0,6766   | 0,0722 | 0,0877   | 0,0781 | 0,0028   | 0,0145 | 0,4915   | 0,0779 | 0,0725   | 0,0671 |
| rm200                     |          |        |          |        |          |        |          |        |          |        |          |        |
| 0                         | 0,7279   | 0,0284 | 0,2998   | 0,0588 | 0,7142   | 0,077  | 0,9609   | 0,0619 | 0,3467   | 0,0777 | 0,7294   | 0,0672 |
| 1                         | 0,2721   | 0,0284 | 0,7002   | 0,0588 | 0,2858   | 0,077  | 0,0391   | 0,0619 | 0,6533   | 0,0777 | 0,2706   | 0,0672 |
| fabq60                    |          |        |          |        |          |        |          |        |          |        |          |        |
| 0                         | 0,9922   | 0,011  | 0,6958   | 0,0705 | 0,5469   | 0,0606 | 0,3425   | 0,058  | 0,0937   | 0,0377 | 0,0621   | 0,0553 |
| 1                         | 0,0077   | 0,0107 | 0,1956   | 0,0304 | 0,2418   | 0,0258 | 0,2618   | 0,0249 | 0,1849   | 0,0295 | 0,1567   | 0,0554 |
| 2                         | 0,0001   | 0,0003 | 0,1086   | 0,0451 | 0,2113   | 0,0478 | 0,3956   | 0,0603 | 0,7214   | 0,0628 | 0,7812   | 0,1093 |
| Mean                      | 0,0079   | 0,0114 | 0,4129   | 0,1144 | 0,6644   | 0,1061 | 1,0531   | 0,1157 | 1,6277   | 0,0992 | 1,7191   | 0,1641 |
| fabq70                    |          |        |          |        |          |        |          |        |          |        |          |        |
| 0                         | 0,9105   | 0,0238 | 0,5024   | 0,0886 | 0,1376   | 0,0469 | 0,1368   | 0,0423 | 0,0037   | 0,0049 | 0,4028   | 0,0675 |
| 1                         | 0,0834   | 0,0205 | 0,3272   | 0,0325 | 0,3086   | 0,0318 | 0,3081   | 0,0342 | 0,0659   | 0,04   | 0,3516   | 0,0297 |

|         |        |        |        |        |        |        |        |        |        |        |        |        |
|---------|--------|--------|--------|--------|--------|--------|--------|--------|--------|--------|--------|--------|
| 2       | 0,0061 | 0,0036 | 0,1705 | 0,0673 | 0,5539 | 0,0687 | 0,5551 | 0,0668 | 0,9304 | 0,0447 | 0,2456 | 0,0596 |
| Mean    | 0,0957 | 0,0271 | 0,6681 | 0,1539 | 1,4163 | 0,1133 | 1,4183 | 0,1065 | 1,9266 | 0,0495 | 0,8428 | 0,1239 |
| fabq90  |        |        |        |        |        |        |        |        |        |        |        |        |
| 0       | 0,9946 | 0,0064 | 0,7038 | 0,0559 | 0,9079 | 0,0469 | 0,3436 | 0,0652 | 0,2219 | 0,0568 | 0,9891 | 0,0287 |
| 1       | 0,0053 | 0,0062 | 0,1549 | 0,0248 | 0,0698 | 0,0278 | 0,1955 | 0,0244 | 0,1791 | 0,0245 | 0,0105 | 0,0264 |
| 2       | 0,0001 | 0,0003 | 0,1413 | 0,0394 | 0,0222 | 0,0198 | 0,4609 | 0,0673 | 0,599  | 0,0676 | 0,0005 | 0,0023 |
| Mean    | 0,0056 | 0,0067 | 0,4374 | 0,0935 | 0,1143 | 0,0663 | 1,1172 | 0,1302 | 1,3771 | 0,1225 | 0,0114 | 0,0311 |
| fabq100 |        |        |        |        |        |        |        |        |        |        |        |        |
| 0       | 0,9353 | 0,0228 | 0,3915 | 0,0671 | 0,2791 | 0,0606 | 0,0872 | 0,0326 | 0,0027 | 0,0037 | 0,956  | 0,0747 |
| 1       | 0,0615 | 0,0204 | 0,3551 | 0,0355 | 0,3585 | 0,0332 | 0,2675 | 0,041  | 0,0569 | 0,0357 | 0,0425 | 0,0696 |
| 2       | 0,0032 | 0,0026 | 0,2534 | 0,0549 | 0,3624 | 0,0597 | 0,6453 | 0,0668 | 0,9404 | 0,0393 | 0,0015 | 0,0051 |
| Mean    | 0,0678 | 0,0252 | 0,8618 | 0,1174 | 1,0834 | 0,1156 | 1,558  | 0,0967 | 1,9377 | 0,0429 | 0,0455 | 0,0798 |

| Loadings – part. domain, single-item, 6-DP | Clusters | R <sup>2</sup> | Loadings<br>The quantities reported under Clusters are simply correlations, representing the square root of the corresponding 'R2' or communality of the associated indicator.<br>Correlations: These are standardised values for the loadings reported in the Loadings output. They represent correlations between the indicators and factors. |
|--------------------------------------------|----------|----------------|-------------------------------------------------------------------------------------------------------------------------------------------------------------------------------------------------------------------------------------------------------------------------------------------------------------------------------------------------|
| bfbe0                                      | 0,626    | 0,3919         |                                                                                                                                                                                                                                                                                                                                                 |
| dlsy0                                      | 0,4684   | 0,2194         |                                                                                                                                                                                                                                                                                                                                                 |
| rm10                                       | 0,5948   | 0,3538         |                                                                                                                                                                                                                                                                                                                                                 |
| rm200                                      | 0,4457   | 0,1987         |                                                                                                                                                                                                                                                                                                                                                 |
| fabq60                                     | 0,7316   | 0,5352         |                                                                                                                                                                                                                                                                                                                                                 |
| fabq70                                     | 0,7542   | 0,5688         |                                                                                                                                                                                                                                                                                                                                                 |
| fabq90                                     | 0,6859   | 0,4705         |                                                                                                                                                                                                                                                                                                                                                 |
| fabq100                                    | 0,7917   | 0,6267         |                                                                                                                                                                                                                                                                                                                                                 |

**Profiles in numbers:**

The first row of numbers shows how large each cluster is. The body of the table contains (marginal) conditional probabilities that show how the clusters are related to the Nominal or Ordinal indicator variables. These probabilities sum to 1 within each cluster (column).

For indicators specified as Continuous, the body of the table contains means instead of probabilities.

For indicators specified as Ordinal, means are displayed in addition to the conditional probabilities.

| 7-DP, part.domain | Cluster1 | s.e.   | Cluster2 | s.e.   | Cluster3 | s.e.   | Cluster4 | s.e.   | Cluster5 | s.e.   | Cluster6 | s.e.   | Cluster7 | s.e.   |
|-------------------|----------|--------|----------|--------|----------|--------|----------|--------|----------|--------|----------|--------|----------|--------|
| Cluster Size      | 33,72%   | 0,0302 | 17,30%   | 0,0345 | 13,38%   | 0,0223 | 11,66%   | 0,0224 | 9,21%    | 0,0254 | 7,95%    | 0,0178 | 6,79%    | 0,0169 |
| <b>Indicators</b> |          |        |          |        |          |        |          |        |          |        |          |        |          |        |
| bfbe0             |          |        |          |        |          |        |          |        |          |        |          |        |          |        |
| 1                 | 0,3459   | 0,0279 | 0,1972   | 0,0695 | 0,0203   | 0,0101 | 0,1175   | 0,0357 | 0,6803   | 0,1203 | 0,0858   | 0,0294 | 0,0125   | 0,009  |
| 2                 | 0,4478   | 0,0241 | 0,423    | 0,0369 | 0,1465   | 0,0391 | 0,3572   | 0,0411 | 0,2849   | 0,0889 | 0,3126   | 0,0476 | 0,11     | 0,0468 |
| 3                 | 0,1513   | 0,0162 | 0,237    | 0,0416 | 0,2756   | 0,0242 | 0,2834   | 0,0264 | 0,0311   | 0,0269 | 0,2973   | 0,0234 | 0,2527   | 0,0364 |
| 4                 | 0,055    | 0,0121 | 0,1428   | 0,0603 | 0,5576   | 0,0646 | 0,2419   | 0,0552 | 0,0037   | 0,0051 | 0,3042   | 0,0642 | 0,6248   | 0,0882 |
| Mean              | 1,9155   | 0,057  | 2,3254   | 0,2255 | 3,3703   | 0,1214 | 2,6496   | 0,1592 | 1,3582   | 0,1571 | 2,8199   | 0,1642 | 3,4898   | 0,1517 |
| dlsy0             |          |        |          |        |          |        |          |        |          |        |          |        |          |        |
| 0                 | 0,9195   | 0,0252 | 0,9194   | 0,0511 | 0,8445   | 0,0564 | 0,4335   | 0,0631 | 0,7228   | 0,0773 | 0,7806   | 0,0653 | 0,2455   | 0,09   |
| 1                 | 0,0796   | 0,0245 | 0,0797   | 0,0498 | 0,1517   | 0,0532 | 0,4898   | 0,052  | 0,2639   | 0,0691 | 0,2114   | 0,0601 | 0,5707   | 0,0521 |
| 2                 | 0,001    | 0,0008 | 0,001    | 0,0013 | 0,0038   | 0,0035 | 0,0767   | 0,0261 | 0,0133   | 0,0096 | 0,0079   | 0,0059 | 0,1837   | 0,0629 |
| Mean              | 0,0815   | 0,0258 | 0,0816   | 0,0523 | 0,1593   | 0,0596 | 0,6432   | 0,0813 | 0,2906   | 0,0858 | 0,2273   | 0,0706 | 0,9382   | 0,1464 |
| rm10              |          |        |          |        |          |        |          |        |          |        |          |        |          |        |
| 0                 | 0,9069   | 0,0304 | 0,999    | 0,0056 | 0,957    | 0,053  | 0,2254   | 0,0926 | 0,7444   | 0,0821 | 0,8928   | 0,0614 | 0,2337   | 0,1005 |
| 1                 | 0,0931   | 0,0304 | 0,001    | 0,0056 | 0,043    | 0,053  | 0,7746   | 0,0926 | 0,2556   | 0,0821 | 0,1072   | 0,0614 | 0,7663   | 0,1005 |
| rm200             |          |        |          |        |          |        |          |        |          |        |          |        |          |        |
| 0                 | 0,7163   | 0,032  | 0,8053   | 0,0635 | 0,7616   | 0,0594 | 0,2832   | 0,0605 | 0,569    | 0,0823 | 0,7296   | 0,0703 | 0,2773   | 0,089  |
| 1                 | 0,2837   | 0,032  | 0,1947   | 0,0635 | 0,2384   | 0,0594 | 0,7168   | 0,0605 | 0,431    | 0,0823 | 0,2704   | 0,0703 | 0,7227   | 0,089  |
| fabq60            |          |        |          |        |          |        |          |        |          |        |          |        |          |        |
| 0                 | 0,9957   | 0,0095 | 0,718    | 0,0869 | 0,1985   | 0,0492 | 0,7521   | 0,081  | 0,4444   | 0,0861 | 0,0461   | 0,0504 | 0,1141   | 0,0593 |
| 1                 | 0,0043   | 0,0093 | 0,1869   | 0,0389 | 0,239    | 0,0262 | 0,1715   | 0,0401 | 0,2595   | 0,0265 | 0,1387   | 0,0631 | 0,2001   | 0,0398 |
| 2                 | 0        | 0,0002 | 0,0951   | 0,0515 | 0,5625   | 0,063  | 0,0764   | 0,0436 | 0,2961   | 0,0769 | 0,8152   | 0,1126 | 0,6858   | 0,095  |
| Mean              | 0,0044   | 0,0096 | 0,3771   | 0,1375 | 1,364    | 0,11   | 0,3242   | 0,1237 | 0,8518   | 0,161  | 1,7691   | 0,1626 | 1,5717   | 0,1533 |
| fabq70            |          |        |          |        |          |        |          |        |          |        |          |        |          |        |
| 0                 | 0,9358   | 0,03   | 0,4455   | 0,0815 | 0,0211   | 0,0176 | 0,6155   | 0,1093 | 0,0228   | 0,0271 | 0,3704   | 0,0709 | 0,0103   | 0,0141 |
| 1                 | 0,062    | 0,0278 | 0,3799   | 0,0412 | 0,1772   | 0,0607 | 0,3037   | 0,0611 | 0,1833   | 0,0884 | 0,3985   | 0,038  | 0,1281   | 0,0794 |

|         |        |        |        |        |        |        |        |        |        |        |        |        |        |        |
|---------|--------|--------|--------|--------|--------|--------|--------|--------|--------|--------|--------|--------|--------|--------|
| 2       | 0,0022 | 0,0023 | 0,1746 | 0,0601 | 0,8017 | 0,0772 | 0,0808 | 0,0533 | 0,7939 | 0,1147 | 0,2311 | 0,0648 | 0,8617 | 0,0932 |
| Mean    | 0,0664 | 0,0322 | 0,7291 | 0,1371 | 1,7806 | 0,0941 | 0,4653 | 0,1607 | 1,7711 | 0,1412 | 0,8608 | 0,1304 | 1,8514 | 0,1071 |
| fabq90  |        |        |        |        |        |        |        |        |        |        |        |        |        |        |
| 0       | 0,9997 | 0,0014 | 0,7853 | 0,0864 | 0,2205 | 0,0515 | 0,6938 | 0,0672 | 0,9654 | 0,0683 | 0,9894 | 0,0342 | 0,2762 | 0,0783 |
| 1       | 0,0003 | 0,0014 | 0,1296 | 0,0373 | 0,1819 | 0,0249 | 0,1598 | 0,0278 | 0,0307 | 0,0539 | 0,0102 | 0,0316 | 0,1921 | 0,0271 |
| 2       | 0      | 0      | 0,0851 | 0,0524 | 0,5975 | 0,0605 | 0,1465 | 0,0479 | 0,0039 | 0,0144 | 0,0004 | 0,0026 | 0,5317 | 0,089  |
| Mean    | 0,0003 | 0,0014 | 0,2998 | 0,138  | 1,377  | 0,1095 | 0,4527 | 0,1134 | 0,0385 | 0,0826 | 0,011  | 0,0368 | 1,2554 | 0,1654 |
| fabq100 |        |        |        |        |        |        |        |        |        |        |        |        |        |        |
| 0       | 0,9916 | 0,0237 | 0,3897 | 0,1008 | 0,0176 | 0,0152 | 0,41   | 0,0917 | 0,2588 | 0,0726 | 0,9217 | 0,0664 | 0,012  | 0,0134 |
| 1       | 0,0084 | 0,0234 | 0,3661 | 0,0389 | 0,1442 | 0,0515 | 0,3625 | 0,0383 | 0,3686 | 0,0343 | 0,0741 | 0,0591 | 0,1212 | 0,0608 |
| 2       | 0      | 0,0003 | 0,2442 | 0,0799 | 0,8383 | 0,066  | 0,2275 | 0,0717 | 0,3727 | 0,0804 | 0,0042 | 0,0074 | 0,8668 | 0,0738 |
| Mean    | 0,0085 | 0,024  | 0,8545 | 0,1776 | 1,8207 | 0,0807 | 0,8175 | 0,16   | 1,1139 | 0,1494 | 0,0826 | 0,0736 | 1,8548 | 0,087  |

| <b>Loadings,<br/>part. domain,<br/>single-item,<br/>7-DP</b> | <b>Clusters</b> | <b>R<sup>2</sup></b> | <b>Loadings</b><br>The quantities reported under Clusters are simply correlations,<br>representing the square root of the corresponding 'R2' or communality<br>of the associated indicator. |
|--------------------------------------------------------------|-----------------|----------------------|---------------------------------------------------------------------------------------------------------------------------------------------------------------------------------------------|
| bfbe0                                                        | 0,5982          | 0,3579               | Correlations: These are standardised values for the loadings reported in<br>the Loadings output. They represent correlations between the<br>indicators and factors.                         |
| dlsy0                                                        | 0,5306          | 0,2815               |                                                                                                                                                                                             |
| rm10                                                         | 0,6708          | 0,45                 |                                                                                                                                                                                             |
| rm200                                                        | 0,3826          | 0,1464               |                                                                                                                                                                                             |
| fabq60                                                       | 0,7415          | 0,5498               |                                                                                                                                                                                             |
| fabq70                                                       | 0,8018          | 0,6429               |                                                                                                                                                                                             |
| fabq90                                                       | 0,6951          | 0,4831               |                                                                                                                                                                                             |
| fabq100                                                      | 0,7933          | 0,6293               |                                                                                                                                                                                             |

# Participation domain, single-item strategy, 4-domain profiles

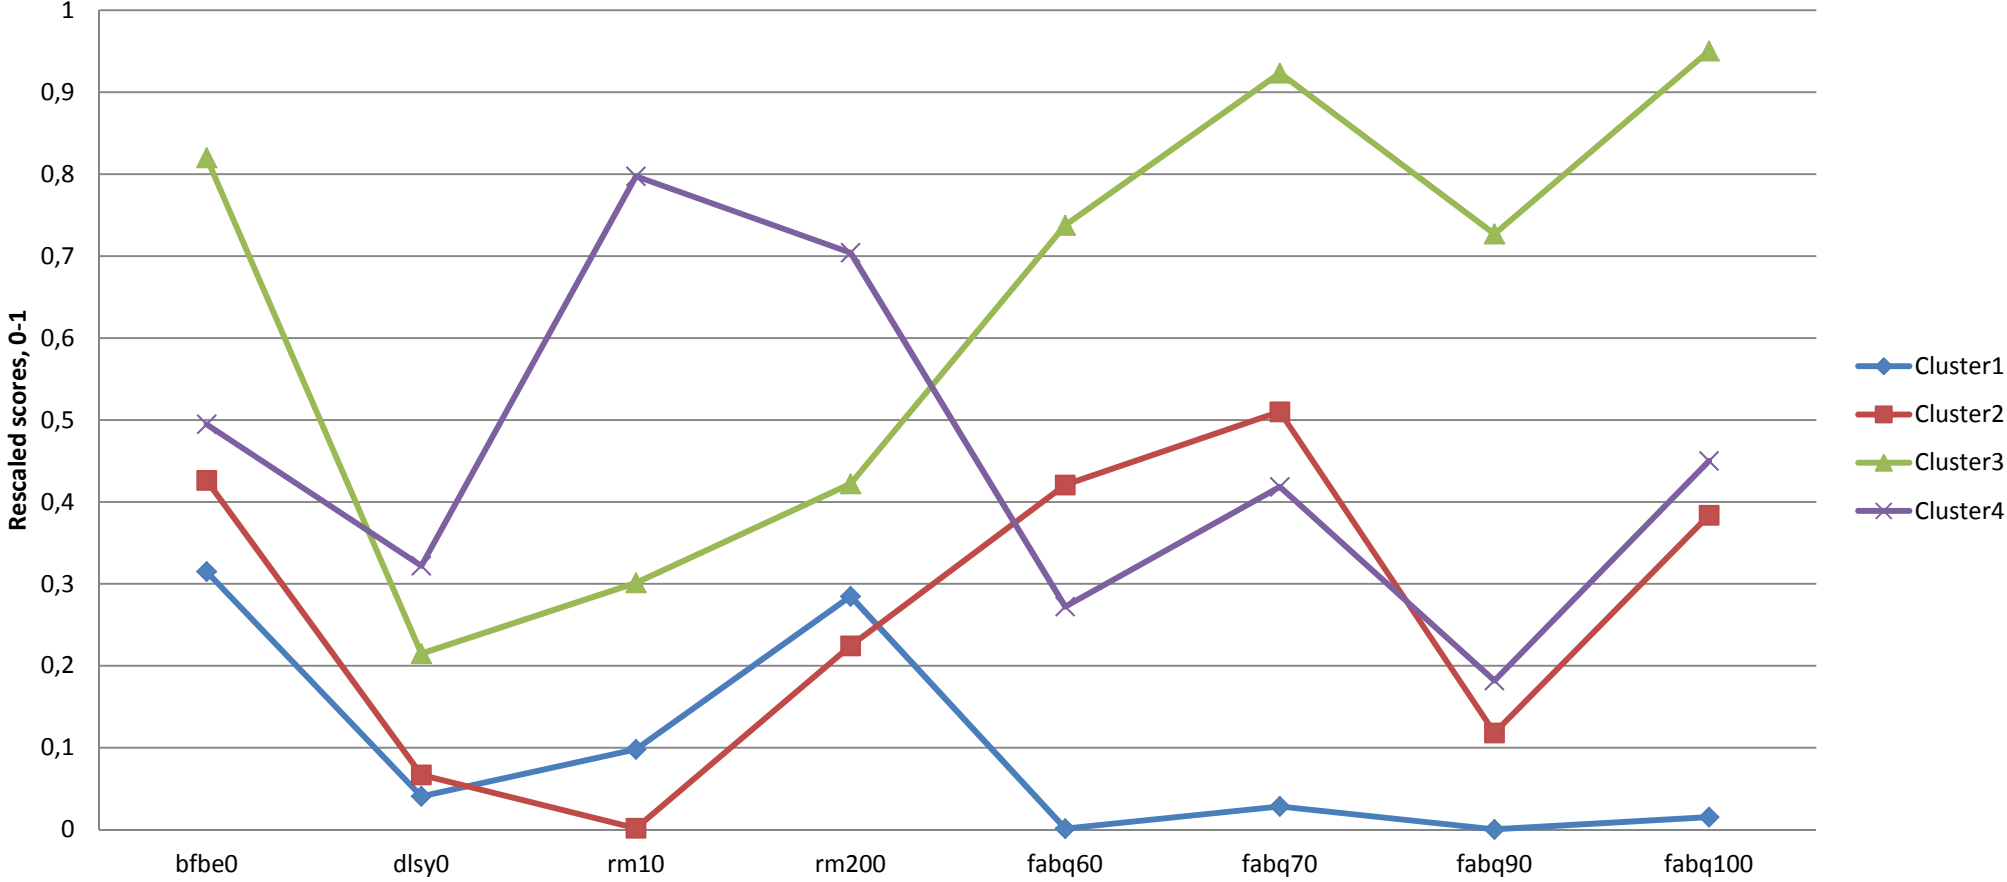

### Participation domain, single-item strategy, 5-domain profiles

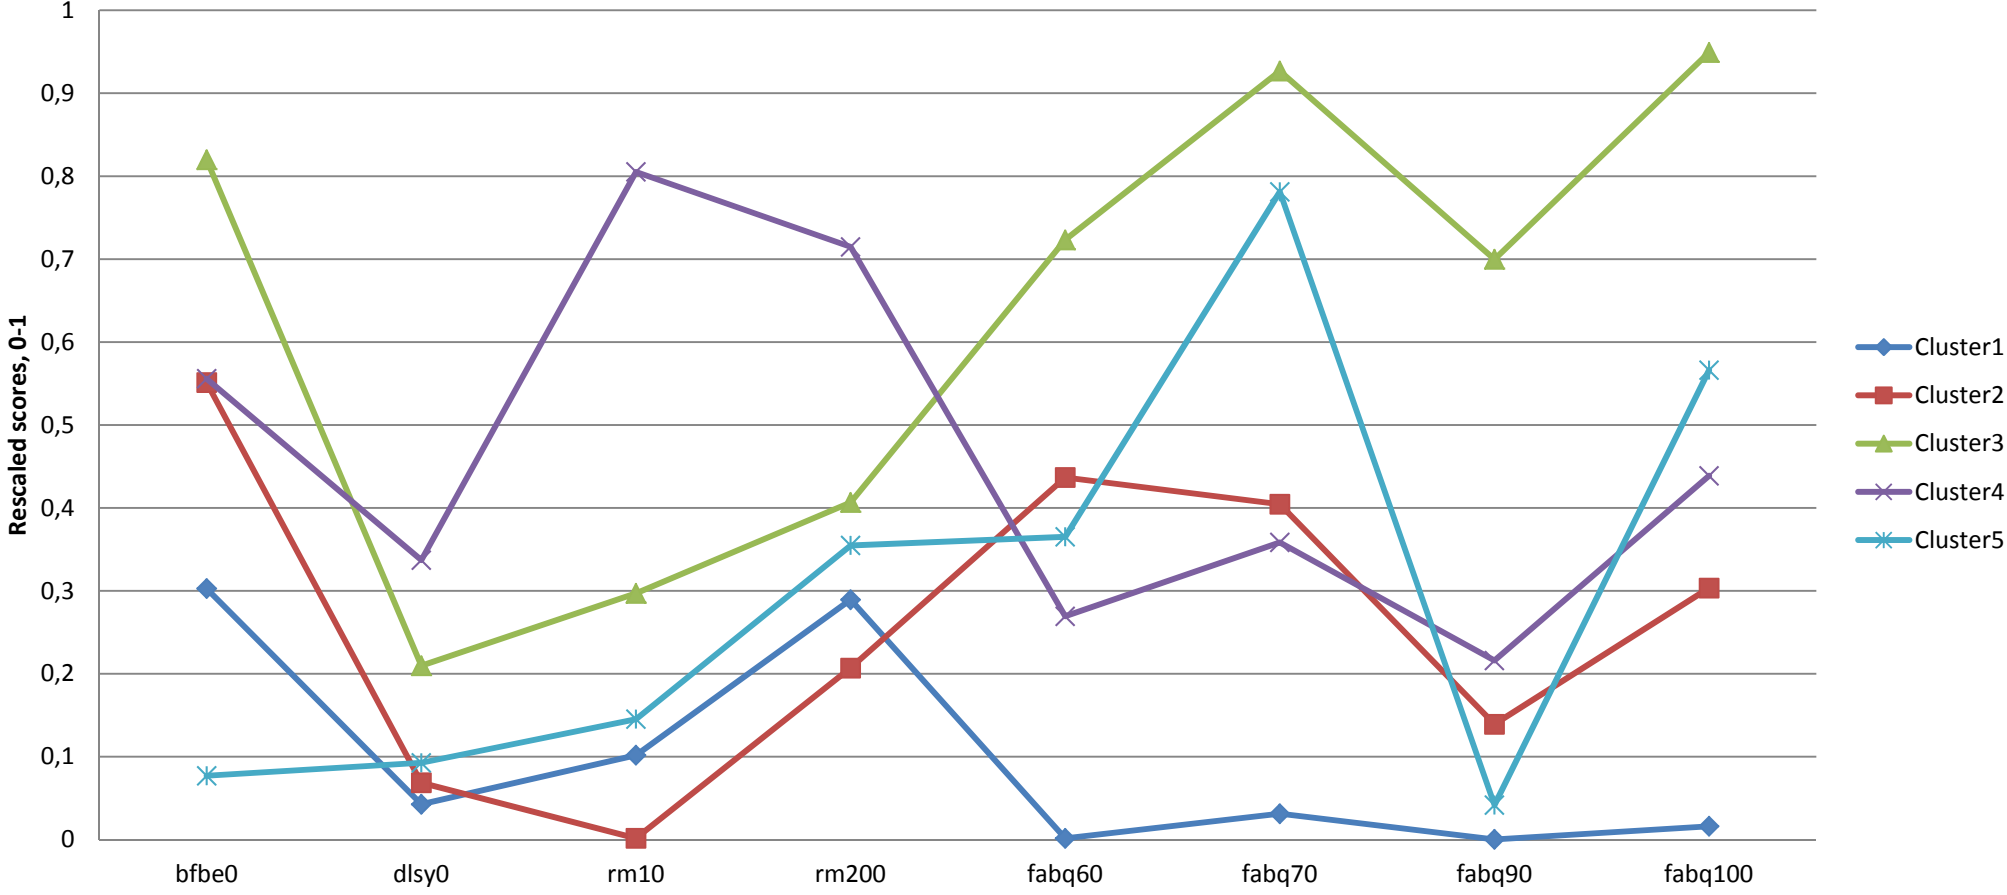

### Participation domain, single-item strategy, 6-domain profiles

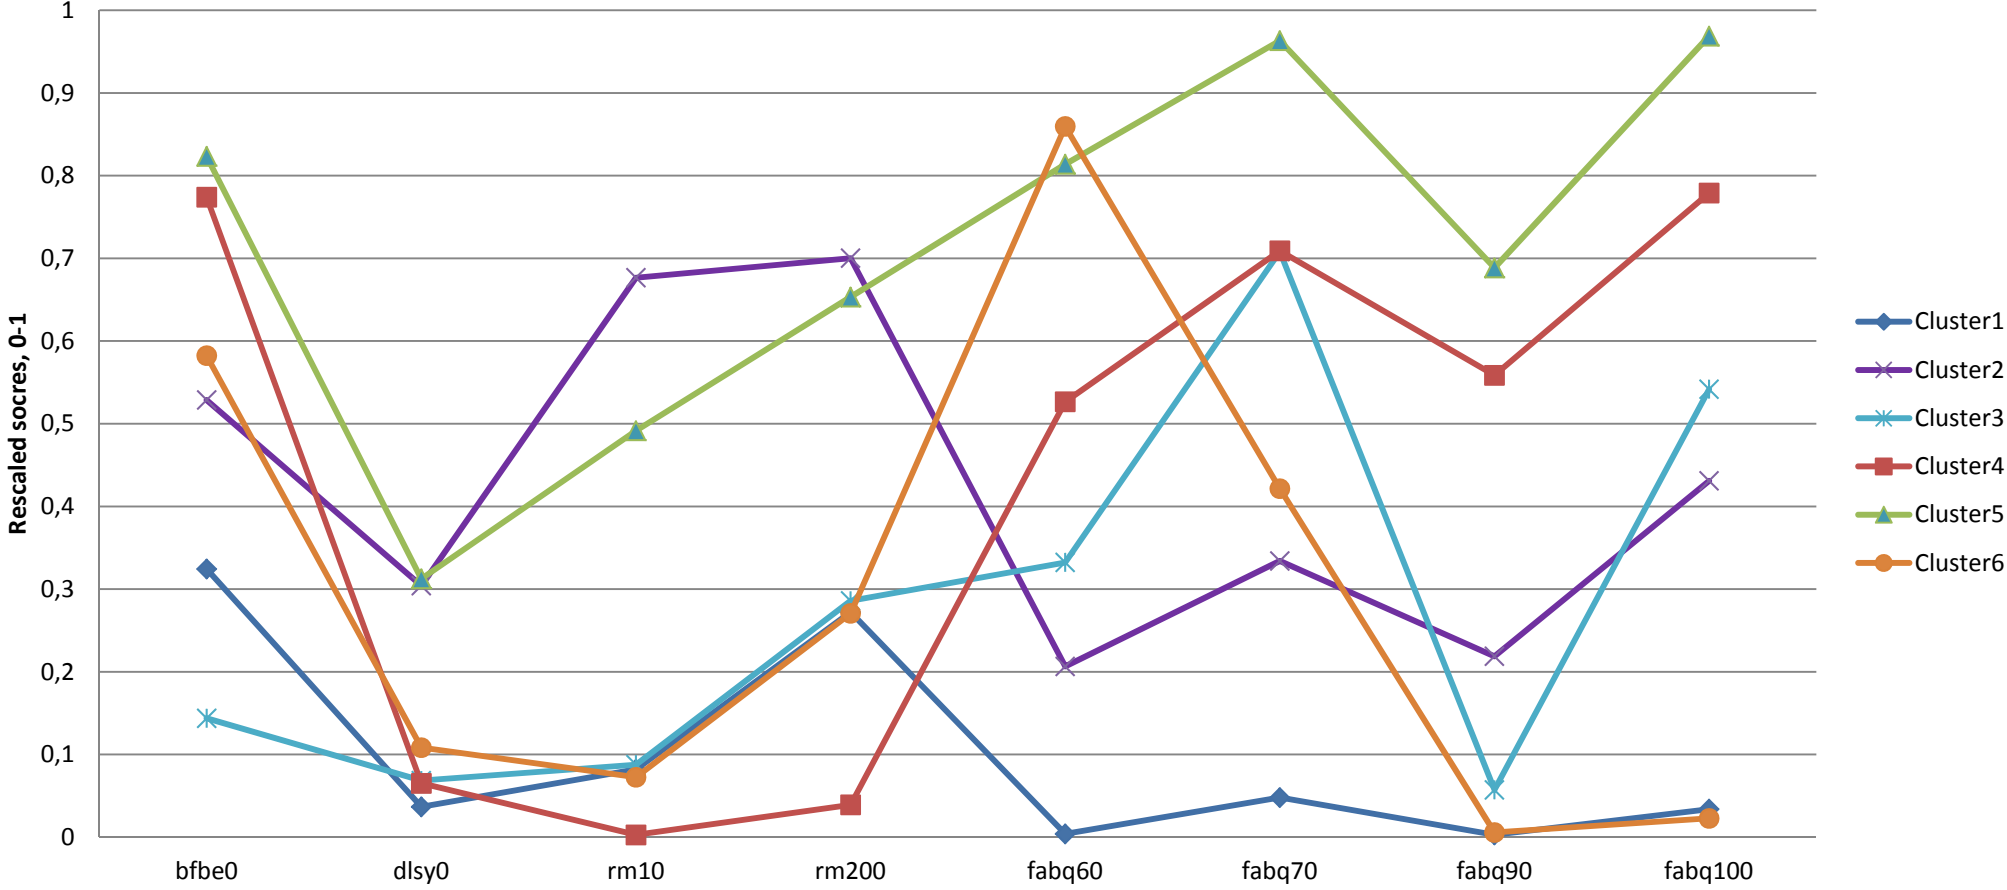



# Participation domain, single-item strategy, 7-domain profiles

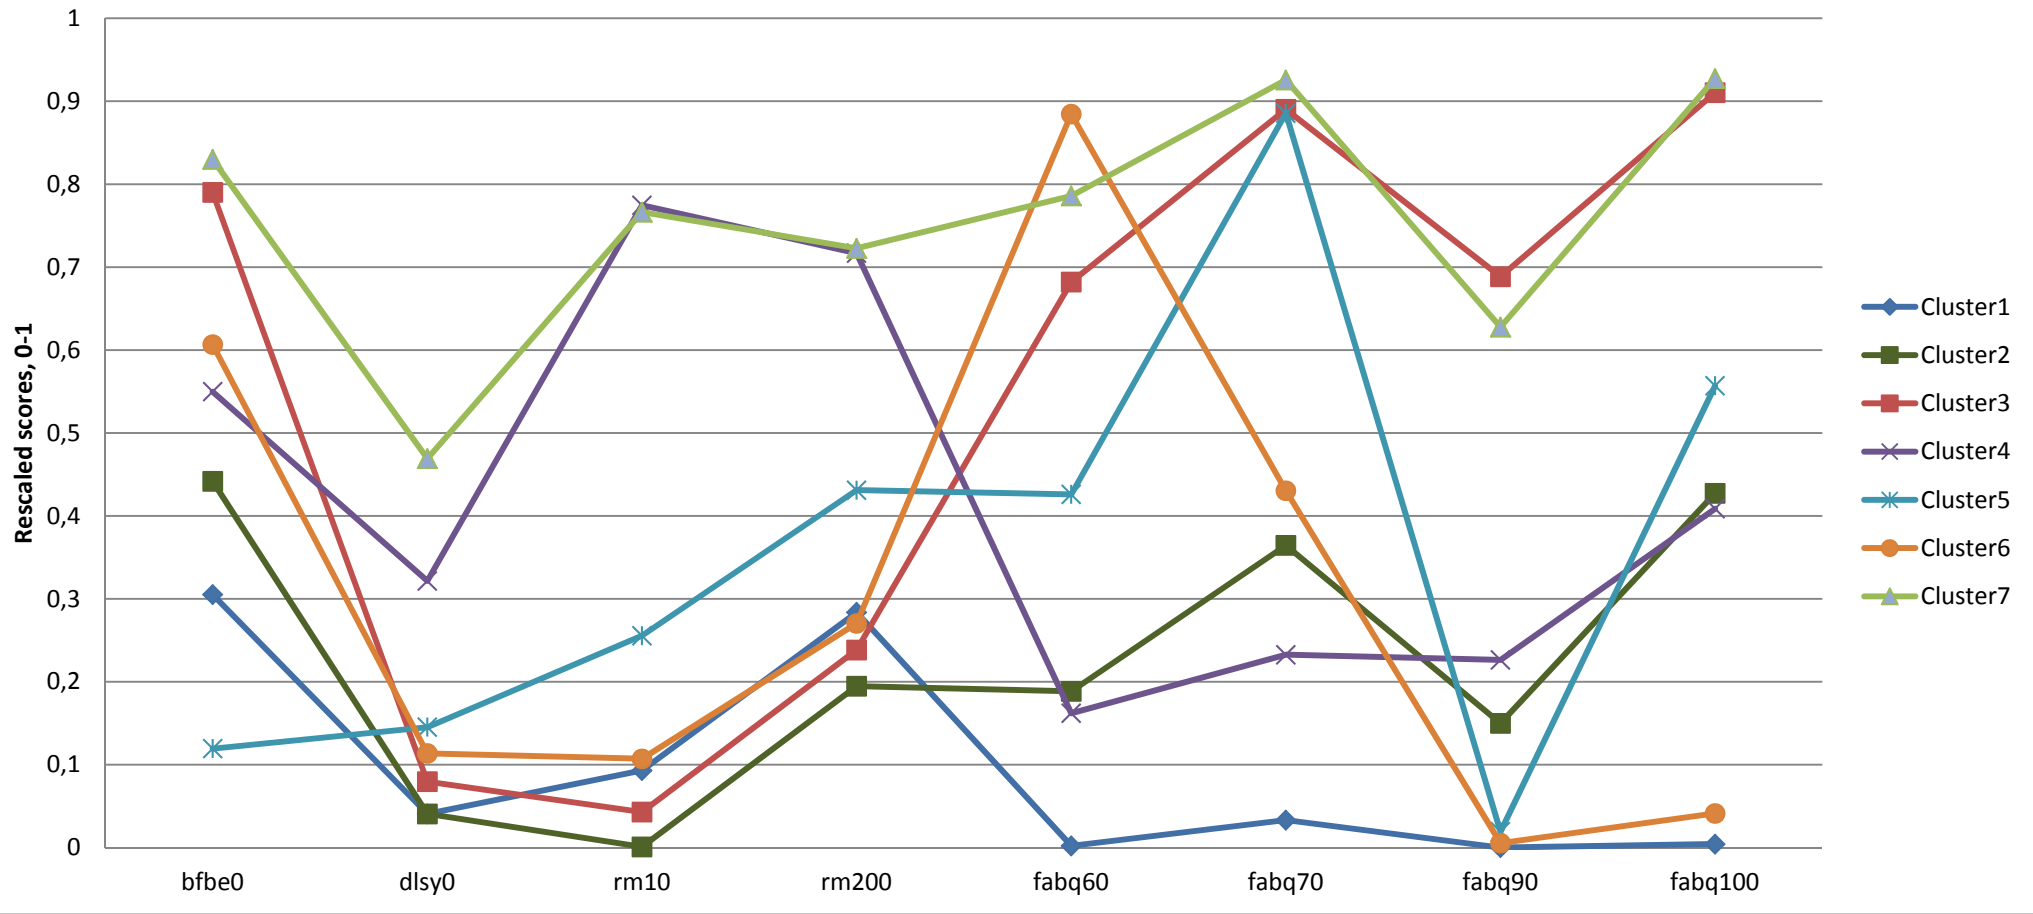

Supplement: Supplementary file 4 [file get_supplementary_file.php]
