# Supplementary material
Source: publisher site journal article supplement (https://www.dovepress.com/article/103330)
Supplement: Supplementary file 1 [file get_supplementary_file.php]

## Additional file 1

### Overview of variables used in the latent class analysis, classified by health domains

**Table 1. Psychology domain**

| Variable                                                                                                            | Abbreviated version of variable | Response options (range)                                    | Data type   | Missing observations, N (%) | Categorisation or reversing of variables (if performed)                                                                                                                                                                                                                                                                                                   | Used in 'single-item' or 'summary-score' strategy | References                                                                   |
|---------------------------------------------------------------------------------------------------------------------|---------------------------------|-------------------------------------------------------------|-------------|-----------------------------|-----------------------------------------------------------------------------------------------------------------------------------------------------------------------------------------------------------------------------------------------------------------------------------------------------------------------------------------------------------|---------------------------------------------------|------------------------------------------------------------------------------|
| Based on all things you do to cope or deal with your pain, on an average day, how much are you able to decrease it? | Able to decrease pain           | 0=Can decrease it completely<br>10=Can't decrease it at all | Continuous  | 26 (2.8)                    | <i>Original scale:</i><br>0=can't decrease it at all<br>10=can decrease it completely<br>Item from the Örebro Musculoskeletal Pain Screening Questionnaire.<br><i>Comment:</i><br>Reverse-scored in the descriptive analysis and the profile plots to make a high score indicate a higher risk of a poor prognosis                                        | Single-item & Summary-score                       | Reliability and validity of the full Örebro pain questionnaire [1, 2]        |
| How likely do you think it is that you would be fully recovered in 3 months?                                        | Negative recovery belief        | 0=Likely to recover<br>1=Unsure-not at all likely           | Dichotomous | 13 (1.4)                    | <i>Original scale:</i><br>0=not at all likely<br>10=very likely<br><i>Comment:</i><br>Dichotomised before the LCA due to highly skewed data distribution. Reverse-scored in the descriptive analysis and the profile plots to make a high score indicate a higher risk of a poor prognosis:<br>0=8-10 Likely to recover<br>1=0-7 Unsure-not at all likely | Single-item & Summary-score                       | Validity (Expectations and association with outcome/change over time) [3, 4] |

|                                                                                                                  |                                           |                                                     |             |          |                                                                                                                                                                                                                                                                                                                                                                                  |                             |                       |
|------------------------------------------------------------------------------------------------------------------|-------------------------------------------|-----------------------------------------------------|-------------|----------|----------------------------------------------------------------------------------------------------------------------------------------------------------------------------------------------------------------------------------------------------------------------------------------------------------------------------------------------------------------------------------|-----------------------------|-----------------------|
| To what extent do you feel socially isolated?                                                                    | Feel socially isolated                    | 0=not at all isolated<br>1=little to quite isolated | Dichotomous | 11 (1.2) | <i>Original scale:</i><br>0=not at all isolated<br>10=quite isolated<br><i>Comment:</i><br>Dichotomised before the LCA due to highly skewed data distribution:<br>0=0 Not at all isolated<br>1=1-10 Little-quite isolated                                                                                                                                                        | Single-item & Summary-score | Validity [5]          |
| How strongly do you agree: Treatment is essential to decrease my pain?                                           | Treatment not essential                   | 0=completely agree<br>10=completely disagree        | Continuous  | 20 (2.2) | <i>Comment:</i><br>For the descriptive analysis, the question was rephrased to: Treatment not essential                                                                                                                                                                                                                                                                          | Single-item & Summary-score | None (own production) |
| It's not really safe for a person with a condition like mine to be physically active (SBT-5)                     | Not safe to be physically active          | 0=disagree<br>1=agree                               | Dichotomous | 28 (3.0) |                                                                                                                                                                                                                                                                                                                                                                                  | Single-item                 | See SBT sum-score     |
| Worrying thoughts have been going through my mind a lot of the time (SBT-6)                                      | Worrying thoughts a lot of the time       | 0=disagree<br>1=agree                               | Dichotomous | 24 (2.6) |                                                                                                                                                                                                                                                                                                                                                                                  | Single-item                 | See SBT sum-score     |
| I feel that my back pain is terrible and it's never going to get any better (SBT-7)                              | Terrible back pain, will never get better | 0=disagree<br>1=agree                               | Dichotomous | 17 (1.8) |                                                                                                                                                                                                                                                                                                                                                                                  | Single-item                 | See SBT sum-score     |
| In general I have not enjoyed all the things I used to enjoy (SBT-8)                                             | Not enjoyed things used to enjoy          | 0=disagree<br>1=agree                               | Dichotomous | 19 (2.0) |                                                                                                                                                                                                                                                                                                                                                                                  | Single-item                 | See SBT sum-score     |
| Sum-score representing all questions related to the SBT Back Tool (9 questions)<br>Psychological high risk group | High-risk group (SBT)                     | 0=low-medium risk<br>1=high risk                    | Dichotomous | 8 (0.9)  | <i>Original scale:</i><br>0=low risk (3 or less of total score)<br>1=medium risk (>3 of total score, but 3 or less on the psychological sub score, Q5-9)<br>2=high risk (>3 of total score and >3 on the psychological sub score, Q5-9)<br><i>Comment:</i><br>Dichotomised before the LCA to suit the classification to the psychological domain (psychological high risk group) | Summary-score               | Validity [6-9]        |
| I sleep less well because of my back problem (RMDQ-15)                                                           | Sleep less well                           | 0=no<br>1=yes                                       | Dichotomous | 22 (2.4) |                                                                                                                                                                                                                                                                                                                                                                                  | Single-item                 | See RMDQ sum-score    |

|                                                                                                   |                                                          |                                                                                                   |             |           |  |                             |                                  |
|---------------------------------------------------------------------------------------------------|----------------------------------------------------------|---------------------------------------------------------------------------------------------------|-------------|-----------|--|-----------------------------|----------------------------------|
| Because of my back problem, I am more irritable and bad tempered with people than usual (RMDQ-17) | More irritable with people than usual                    | 0=no<br>1=yes                                                                                     | Dichotomous | 17 (1.8)  |  | Single-item                 | See RMDQ sum-score               |
| I keep rubbing or holding areas of my body that hurt or are uncomfortable (RMDQ-21)               | Rubbing/holding areas that hurt/are uncomfortable        | 0=no<br>1=yes                                                                                     | Dichotomous | 15 (1.6)  |  | Single-item                 | See RMDQ sum-score               |
| I often express concern to other people over what might be happening to my health (RMDQ-23)       | Often express concern                                    | 0=no<br>1=yes                                                                                     | Dichotomous | 17 (1.8)  |  | Single-item                 | See RMDQ sum-score               |
| Physical activity might harm my back (FABQ-3)                                                     | Physical activity might harm back                        | 0=completely disagree<br>3=unsure<br>6=completely agree                                           | Ordinal     | 29 (3.1)  |  | Single-item                 | See FABQ-pa sum-score            |
| I should not do physical activities which (might) make my pain worse (FABQ-4)                     | Should not do physical activity which (might) make worse | 0=completely disagree<br>3=unsure<br>6=completely agree                                           | Ordinal     | 30 (3.2)  |  | Single-item                 | See FABQ-pa sum-score            |
| My work might harm my back (FABQ-11)                                                              | Work might harm back                                     | 0=completely disagree<br>3=unsure<br>6=completely agree                                           | Ordinal     | 44* (5.2) |  | Single-item                 | See FABQ-pa sum-score            |
| I should not do my normal work with my present pain (FABQ-12)                                     | Should not do normal work with present pain              | 0=completely disagree<br>3=unsure<br>6=completely agree                                           | Ordinal     | 41* (4.8) |  | Single-item                 | See FABQ-pa sum-score            |
| I cannot do my normal work till my pain is treated (FABQ-14)                                      | Cannot work till pain is treated                         | 0=completely disagree<br>3=unsure<br>6=completely agree                                           | Ordinal     | 43* (5.1) |  | Single-item & Summary-score | See FABQ-pa sum-score            |
| Sum-score: Fear-avoidance beliefs about physical activity (FABQ-pa) (Questions 2,3,4,5)           | FABQ-physical activity subscale                          | 0=No fear-avoidance beliefs<br>24=high degree of fear-avoidance beliefs (The whole range is used) | Continuous  | 46 (5.0)  |  | Summary-score               | Validity and reliability [10-12] |

|                                                                |                                     |                                                                                                                                                        |         |          |                                                                                                                                                                                                                                                                                |             |                   |
|----------------------------------------------------------------|-------------------------------------|--------------------------------------------------------------------------------------------------------------------------------------------------------|---------|----------|--------------------------------------------------------------------------------------------------------------------------------------------------------------------------------------------------------------------------------------------------------------------------------|-------------|-------------------|
| Have you felt low in spirits or sad?<br>(MDI-1)                | Felt low in spirits/sad             | 0=at no time<br>1=some of the time<br>2=slightly-all the time                                                                                          | Ordinal | 7 (0.8)  | <i>Original scale:</i><br>0=at no time<br>1=some of the time<br>2=slightly less than half the time<br>3=slightly more than half the time<br>4=most of the time<br>5=all the time<br><br><i>Comment:</i><br>Trichotomised before the LCA due to highly skewed data distribution | Single-item | See MDI sum-score |
| Have you lost interest in your daily activities?<br>(MDI-2)    | Lost interest in daily activities   | 0=at no time<br>1=some of the time<br>2=slightly-all the time                                                                                          | Ordinal | 10 (1.1) |                                                                                                                                                                                                                                                                                | Single-item | See MDI sum-score |
| Have you felt lacking in energy and strength?<br>(MDI-3)       | Felt lacking in energy and strength | 0=at no time<br>1=some of the time<br>2=slightly less than half the time<br>3=slightly more than half the time<br>4=Most of the time<br>5=All the time | Ordinal | 5 (0.5)  |                                                                                                                                                                                                                                                                                | Single-item | See MDI sum-score |
| Have you felt less self-confident?<br>(MDI-4)                  | Felt less self-confident            | 0=at no time<br>1=some of the time<br>2=slightly-all the time                                                                                          | Ordinal | 9 (1.0)  | <i>Original scale:</i><br>0=at no time<br>1=some of the time<br>2=slightly less than half the time<br>3=slightly more than half the time<br>4=most of the time<br>5=all the time<br><br><i>Comment:</i><br>Trichotomised before the LCA due to highly skewed data distribution | Single-item | See MDI sum-score |
| Have you had a bad conscience or feelings of guilt?<br>(MDI-5) | Had a bad conscience                | 0=at no time<br>1=some of the time<br>2=slightly-all the time                                                                                          | Ordinal | 5 (0.5)  |                                                                                                                                                                                                                                                                                | Single-item | See MDI sum-score |

|                                                                                                                                                |                                               |                                                                                                                                                                          |            |          |                                                                                                                                                                                                                                                                            |               |                                         |
|------------------------------------------------------------------------------------------------------------------------------------------------|-----------------------------------------------|--------------------------------------------------------------------------------------------------------------------------------------------------------------------------|------------|----------|----------------------------------------------------------------------------------------------------------------------------------------------------------------------------------------------------------------------------------------------------------------------------|---------------|-----------------------------------------|
| Have you had difficulty in concentrating, e.g. when reading the newspaper or watching television?<br>(MDI-7)                                   | Had difficulty in concentrating               | 0=at no time<br>1=some of the time<br>2=slightly-all the time                                                                                                            | Ordinal    | 6 (0.6)  |                                                                                                                                                                                                                                                                            | Single-item   | See MDI sum-score                       |
| Have you felt very restless/subdued or slowed down?<br>(MDI-8)                                                                                 | Felt very restless/subdued/slowed down        | 0=at no time<br>1=some of the time<br>2=slightly-all the time                                                                                                            | Ordinal    | 6 (0.6)  |                                                                                                                                                                                                                                                                            | Single-item   | See MDI sum-score                       |
| Have you had trouble sleeping at night?<br>(MDI-9)                                                                                             | Had trouble sleeping at night                 | 0=at no time<br>1=some of the time<br>2=slightly less than half the time<br>3=slightly more than half the time<br>4=Most of the time<br>5=All the time See MDI-sum-score | Ordinal    | 6 (0.6)  |                                                                                                                                                                                                                                                                            | Single-item   | See MDI sum-score                       |
| Have you suffered from reduced/increased appetite?<br>(MDI-10)                                                                                 | Have suffered from reduced/increased appetite | 0=at no time<br>1=some of the time<br>2=slightly-all the time                                                                                                            | Ordinal    | 6 (0.6)  | <i>Original scale:</i><br>0=at no time<br>1=some of the time<br>2=slightly less than half the time<br>3=slightly more than half the time<br>4=most of the time<br>5=all the time<br><i>Comment:</i><br>Trichotomised before the LCA due to highly skewed data distribution | Single-item   | See MDI sum-score                       |
| Sum-score: Major Depression Inventory (10 questions)<br><i>(MDI-6 not used in the single-item strategy, but was part of the summary-score)</i> | Degree of depression                          | 0=no depression<br>50=severe depression (37 is the highest score in the cohort)                                                                                          | Continuous | 15 (1.6) | <i>Original scale:</i><br>Scored as a depression rating scale:<br>Mild depression: 20-24<br>Moderate depression: 25-29<br>Severe depression: 30 or more                                                                                                                    | Summary-score | Depression rating scale (validity) [13] |

LCA = Latent Class Analysis

FABQ-pa = Fear-Avoidance Beliefs Questionnaire, physical activity subscale

MDI = Major Depression Inventory

RMDQ = Roland-Morris Disability Questionnaire (23-item)

SBT = STarT Back Tool

\*The questions were only to be answered if the patient was working. Calculation of missing data on those variables excludes: students, unemployed, early retirement/retirement and health-related retirement

**Table 2. Pain domain**

| Variable                                                                 | Abbreviated version of variable | Response options (range)                                     | Data type  | Missing observations, N (%) | Categorisation or reversing of variables (if performed)                                                                                                                                                                             | Used in 'single-item' or 'summary-score' strategy | References                              |
|--------------------------------------------------------------------------|---------------------------------|--------------------------------------------------------------|------------|-----------------------------|-------------------------------------------------------------------------------------------------------------------------------------------------------------------------------------------------------------------------------------|---------------------------------------------------|-----------------------------------------|
| For how long has this episode of LBP lasted?                             | Duration of LBP                 | 1=0-2 weeks<br>2=2-4 weeks<br>3=1-3 months<br>4=>3 months    | Ordinal    | 18 (1.9)                    |                                                                                                                                                                                                                                     | Single-item & Summary-score                       | None (own production)                   |
| Back pain intensity on average the last week (Numeric Pain Rating Scale) | LBP intensity                   | 0=no pain<br>10=worst imaginable pain                        | Continuous | 25 (2.7)                    |                                                                                                                                                                                                                                     | Single-item & Summary-score                       | Validity and reliability [14, 15]       |
| Leg pain intensity on average the last week (Numeric Pain Rating Scale)  | Leg pain intensity              | 0=no pain<br>1=mild pain<br>2=moderate-worst imaginable pain | Ordinal    | 43 (4.6)                    | <i>Original scale:</i><br>0=no pain<br>10=worst imaginable pain<br><i>Comment:</i><br>Trichotomised before the LCA due to highly skewed data distribution:<br>0=no pain<br>1=1-4 mild pain<br>2=>4 moderate - worst imaginable pain | Single-item & Summary-score                       | As above.<br>Trichotomisation: [16, 17] |

|                                                                                  |                                      |                                                                                      |             |          |                                                                                                                                                                                                         |                             |                                  |
|----------------------------------------------------------------------------------|--------------------------------------|--------------------------------------------------------------------------------------|-------------|----------|---------------------------------------------------------------------------------------------------------------------------------------------------------------------------------------------------------|-----------------------------|----------------------------------|
| How many episodes of LBP have you had before this one?                           | Previous LBP episodes                | 0=no previous episodes<br>1=1-3 previous episodes<br>2=more than 3 previous episodes | Ordinal     | 19 (2.0) |                                                                                                                                                                                                         | Single-item & Summary-score | None (own production)            |
| How many days have you had LBP within the last year?                             | More than 30 days of LBP last year   | 0= $\leq$ 30 days<br>1= $>$ 30 days                                                  | Dichotomous | 32 (3.4) |                                                                                                                                                                                                         | Single-item & Summary-score | None (own production)            |
| My back pain has spread down my leg(s) at some time in the last 2 weeks (SBT-1)  | Pain has spread down leg(s)          | 0=no<br>1=yes                                                                        | Dichotomous | 16 (1.7) |                                                                                                                                                                                                         | Single-item                 | See SBT sum-score                |
| I have had pain in the shoulder or neck at some time in the last 2 weeks (SBT-2) | Shoulder/neck pain                   | 0=no<br>1=yes                                                                        | Dichotomous | 20 (2.2) |                                                                                                                                                                                                         | Single-item                 | See SBT sum-score                |
| Overall, how bothersome has your back pain been in the last 2 weeks? (SBT-9)     | Very-extremely bothersome BP         | 0=no-moderately bothersome pain<br>1=very-extremely bothersome pain                  | Dichotomous | 12 (1.3) | <i>Original scale:</i><br>0=not at all<br>0=slightly<br>0=moderately<br>1=very much<br>1=extremely<br><i>Comment:</i><br>Dichotomised before the LCA as prescribed in the scoring instruction (0 and 1) | Single-item                 | See SBT sum-score                |
| My back or leg is painful almost all the time (RMDQ-11)                          | Back/leg painful almost all the time | 0=no<br>1=yes                                                                        | Dichotomous | 19 (2.0) |                                                                                                                                                                                                         | Single-item                 | See RMDQ sum-score               |
| My pain was caused by physical activity (FABQ-1)                                 | Pain caused by physical activity     | 0=completely disagree<br>3=unsure<br>6=completely agree                              | Ordinal     | 18 (1.9) |                                                                                                                                                                                                         | Single-item & Summary-score | Validity and reliability [10-12] |
| Physical activity makes my pain worse (FABQ-2)                                   | Physical activity makes worse        | 0=completely disagree<br>3=unsure<br>6=completely agree                              | Ordinal     | 23 (2.5) |                                                                                                                                                                                                         | Single-item                 | See FABQ-pa sum-score            |

|                                           |                          |                                                                                                             |                    |             |                                                                                                                                                                                                                                                                                                                                                                                                                                                                                                             |                             |                                               |
|-------------------------------------------|--------------------------|-------------------------------------------------------------------------------------------------------------|--------------------|-------------|-------------------------------------------------------------------------------------------------------------------------------------------------------------------------------------------------------------------------------------------------------------------------------------------------------------------------------------------------------------------------------------------------------------------------------------------------------------------------------------------------------------|-----------------------------|-----------------------------------------------|
| Pain distribution <sup>#</sup>            | Pain distribution        | 0=back pain only<br>1=back pain and pain in one leg<br>2=back pain and pain in both legs<br>3=leg pain only | Multistate nominal | 15 (1.6)    | <p><i>Original scale:</i><br/>Variable created before the LCA based on the following three yes/no questions:</p> <ul style="list-style-type: none"> <li>• Back pain</li> <li>• Leg pain right</li> <li>• Leg pain left</li> </ul> <p>Participants who did not report any pain, were recoded as missing data<br/><i>Comment:</i><br/>For the profile plots, the category 'back pain only' was reverse-scored so a high score indicated a higher risk of a poor prognosis (<i>not</i> only low back pain)</p> | Single-item & Summary-score | None (own production)                         |
| Back pain is not dominating? <sup>#</sup> | LBP not dominating       | 0=no<br>1=yes                                                                                               | Dichotomous        | 9 (1.0)     | <p><i>Original scale:</i><br/>Variable created before the LCA was 'dominating back pain' based on the following three yes/no questions:<br/>1=dominating back pain (above gluteal fold)<br/>0=dominating leg pain (below gluteal fold)<br/>0=back pain equals leg pain<br/><i>Comment:</i><br/>For the descriptive analysis and profile plots, the variable was reverse-scored so a high score indicated a higher risk of a poor prognosis (<i>not</i> having dominating back pain = higher risk)</p>       | Single-item & Summary-score | None (own production)                         |
| No paraspinal pain onset <sup>#</sup>     | No paraspinal pain onset | 0=no<br>1=yes                                                                                               | Dichotomous        | 121* (13.2) | <p><i>Original scale:</i><br/>Paraspinal pain onset, 1=yes<br/>Part of a test battery for 'facet joint syndrome'. Only to be asked if patients had dominating back pain.<br/>For the LCA, the variable was used in its original form<br/><i>Comment:</i><br/>For the descriptive analysis and</p>                                                                                                                                                                                                           | Single-item & Summary-score | Element of diagnostic classification [18, 19] |



|                                                                                                                                                                                                                                                                                                                                                                                                                                                                                        |  |  |  |  |                                                                                                                                                                                                                                   |  |  |
|----------------------------------------------------------------------------------------------------------------------------------------------------------------------------------------------------------------------------------------------------------------------------------------------------------------------------------------------------------------------------------------------------------------------------------------------------------------------------------------|--|--|--|--|-----------------------------------------------------------------------------------------------------------------------------------------------------------------------------------------------------------------------------------|--|--|
|                                                                                                                                                                                                                                                                                                                                                                                                                                                                                        |  |  |  |  | profile plots, the variable was reverse-scored so a high score indicated a higher risk of a poor prognosis cf. the analysis (profile plots) showed, that patients seem to be worse off if <i>not</i> having paraspinal pain onset |  |  |
| <p>LCA = Latent Class Analysis<br/> LBP = Low back pain<br/> FABQ = Fear-Avoidance Beliefs Questionnaire<br/> RMDQ = Roland-Morris Disability Questionnaire (23-item)<br/> SBT = STarT Back Tool</p> <p>* The question was only to be answered if there was dominating back pain and the amount of missing data reported relative to that<br/> #Variables from the clinician-reported questionnaire. All other variables are from the patient self-reported baseline questionnaire</p> |  |  |  |  |                                                                                                                                                                                                                                   |  |  |

**Table 3. Activity domain**

| Variable                                                                                 | Abbreviated version of variable    | Response options (range) | Data type   | Missing observations, N (%) | Categorisation or reversing of variables (if performed) | Used in 'single-item' or 'summary-score' strategy | References         |
|------------------------------------------------------------------------------------------|------------------------------------|--------------------------|-------------|-----------------------------|---------------------------------------------------------|---------------------------------------------------|--------------------|
| I have only walked short distances because of my back pain (SBT-3)                       | Only walked short distances        | 0=disagree<br>1=agree    | Dichotomous | 29 (3.1)                    |                                                         | Single-item                                       | See SBT sum-score  |
| In the last 2 weeks, I have dressed more slowly than usual because of back pain (SBT-4)  | Dressed more slowly last two weeks | 0=disagree<br>1=agree    | Dichotomous | 16 (1.7)                    |                                                         | Single-item                                       | See SBT sum-score  |
| I change position frequently to try to get my back or leg comfortable (RMDQ-2)           | Change position frequently         | 0=no<br>1=yes            | Dichotomous | 16 (1.7)                    |                                                         | Single-item                                       | See RMDQ sum-score |
| I walk more slowly than usual because of my back problem or leg pain (sciatica) (RMDQ-3) | Walk more slowly                   | 0=no<br>1=yes            | Dichotomous | 20 (2.2)                    |                                                         | Single-item                                       | See RMDQ sum-score |

|                                                                                                        |                                                  |               |             |          |  |             |                    |
|--------------------------------------------------------------------------------------------------------|--------------------------------------------------|---------------|-------------|----------|--|-------------|--------------------|
| Because of my back problem, I am not doing any of the jobs that I usually do around the house (RMDQ-4) | Not doing usual jobs around the house            | 0=no<br>1=yes | Dichotomous | 18 (1.9) |  | Single-item | See RMDQ sum-score |
| Because of my back problem, I use a handrail to get upstairs (RMDQ-5)                                  | Use handrail to get upstairs                     | 0=no<br>1=yes | Dichotomous | 18 (1.9) |  | Single-item | See RMDQ sum-score |
| Because of my back problem, I have to hold on to something to get out of an easy chair (RMDQ-6)        | Hold on to something to get out of an easy chair | 0=no<br>1=yes | Dichotomous | 16 (1.7) |  | Single-item | See RMDQ sum-score |
| I get dressed more slowly than usual because of my back problem or leg pain (sciatica) (RMDQ-7)        | Get dressed more slowly                          | 0=no<br>1=yes | Dichotomous | 15 (1.6) |  | Single-item | See RMDQ sum-score |
| I only stand for short periods of time because of my back problem or leg pain (sciatica) (RMDQ-8)      | Only stand for short periods of time             | 0=no<br>1=yes | Dichotomous | 15 (1.6) |  | Single-item | See RMDQ sum-score |
| Because of my back problem, I try not to bend or kneel down (RMDQ-9)                                   | Try not to bend or kneel down                    | 0=no<br>1=yes | Dichotomous | 17 (1.8) |  | Single-item | See RMDQ sum-score |
| I find it difficult to get out of a chair because of my back problem or leg pain (sciatica) (RMDQ-10)  | Difficult to get out of a chair                  | 0=no<br>1=yes | Dichotomous | 14 (1.5) |  | Single-item | See RMDQ sum-score |
| I find it difficult to turn over in bed because of my back problem or leg pain (sciatica) (RMDQ-12)    | Difficult to turn over in bed                    | 0=no<br>1=yes | Dichotomous | 18 (1.9) |  | Single-item | See RMDQ sum-score |
| I have trouble putting on my socks (or stockings) because of the pain in my back or leg (RMDQ-13)      | Trouble putting on socks                         | 0=no<br>1=yes | Dichotomous | 16 (1.7) |  | Single-item | See RMDQ sum-score |
| I only walk short distances because of my back problem or leg pain (sciatica) (RMDQ-14)                | Only walk short distances                        | 0=no<br>1=yes | Dichotomous | 16 (1.7) |  | Single-item | See RMDQ sum-score |
| I avoid heavy jobs around the house because of my back problem (RMDQ-16)                               | Avoid heavy jobs around the house                | 0=no<br>1=yes | Dichotomous | 14 (1.5) |  | Single-item | See RMDQ sum-score |
| Because of my back problem, I go upstairs more slowly than usual (RMDQ-18)                             | Go upstairs more slowly                          | 0=no<br>1=yes | Dichotomous | 15 (1.6) |  | Single-item | See RMDQ sum-score |

|                                                                                                                  |                                                             |                                                                       |             |                 |                                                                                                                                                                                                                                |                             |                                                         |
|------------------------------------------------------------------------------------------------------------------|-------------------------------------------------------------|-----------------------------------------------------------------------|-------------|-----------------|--------------------------------------------------------------------------------------------------------------------------------------------------------------------------------------------------------------------------------|-----------------------------|---------------------------------------------------------|
| I stay in bed most of the time because of my back or leg pain (sciatica) (RMDQ-19)                               | Stay in bed most of the time                                | 0=no<br>1=yes                                                         | Dichotomous | 14 (1.5)        |                                                                                                                                                                                                                                | Single-item                 | See RMDQ sum-score                                      |
| Because of my back problem, I am doing less of the daily work around the house than I would usually do (RMDQ-22) | Do less daily work around the house                         | 0=no<br>1=yes                                                         | Dichotomous | 15 (1.6)        |                                                                                                                                                                                                                                | Single-item                 | See RMDQ sum-score                                      |
| Sum-score representing the Roland Morris Disability Questionnaire (23 questions), proportional score             | Roland-Morris summary-score                                 | 0=no disability<br>100=severe disability<br>(The whole range is used) | Continuous  | 14 (1.5)        |                                                                                                                                                                                                                                | Summary-score               | Validity [20]<br>Proportional recalculation method [21] |
| I cannot do physical activities which (might) make my pain worse (FABQ-5)                                        | Cannot do physical activities which (might) make pain worse | 0=completely disagree<br>3=unsure<br>6=completely agree               | Ordinal     | 34 (3.7)        |                                                                                                                                                                                                                                | Single-item                 | Validity and reliability [10-12]                        |
| I cannot do my normal work with my present pain (FABQ-13)                                                        | Cannot work with present pain                               | 0=disagree<br>1=unsure<br>2=agree                                     | Ordinal     | 41*(4.8)        | <i>Original scale:</i><br>0=completely disagree<br>3=unsure<br>6=completely agree<br><i>Comment:</i><br>Trichotomised before the LCA due to highly skewed data distribution (few observations answering other than 'disagree') | Single-item & Summary-score | Validity and reliability [10-12]                        |
| Best posture is to sit <sup>#</sup>                                                                              | Best posture to sit                                         | 0=no<br>1=yes                                                         | Dichotomous | 105**<br>(11.5) | <i>Original scale:</i><br>As shown. The variable was part of a test battery for 'facet joint syndrome'. Only to be asked if patients had dominating back pain.                                                                 | Single-item & Summary-score | Element of diagnostic classification [18, 19]           |
| Best activity is <i>not</i> to walk <sup>#</sup>                                                                 | Best activity is not to walk                                | 0=no<br>1=yes                                                         | Dichotomous | 119**<br>(13.0) | <i>Original scale:</i><br>Best activity to walk, 1=yes<br>Part of a test battery for 'facet joint syndrome'. Only to be asked if patients had dominating back pain.                                                            | Single-item & Summary-score | Element of diagnostic classification [18, 19]           |

|                                                                                                                                                                                                                                                                                                                                                                                                                                                                                                                                                                                                                                                                                  |  |  |  |  |                                                                                                                                                                                                                                                                                                                                           |  |  |
|----------------------------------------------------------------------------------------------------------------------------------------------------------------------------------------------------------------------------------------------------------------------------------------------------------------------------------------------------------------------------------------------------------------------------------------------------------------------------------------------------------------------------------------------------------------------------------------------------------------------------------------------------------------------------------|--|--|--|--|-------------------------------------------------------------------------------------------------------------------------------------------------------------------------------------------------------------------------------------------------------------------------------------------------------------------------------------------|--|--|
|                                                                                                                                                                                                                                                                                                                                                                                                                                                                                                                                                                                                                                                                                  |  |  |  |  | For the LCA, variable was used in its original form<br><i>Comment:</i><br>For the descriptive analysis and profile plots, the variable was reverse-scored so a high score indicated a higher risk of a poor prognosis cf. the analysis (profile plots) showed, that patients seem to be worse off if best activity was <i>not</i> to walk |  |  |
| <p>LCA = Latent Class Analysis<br/> FABQ = Fear-Avoidance Beliefs Questionnaire<br/> RMDQ = Roland-Morris Disability Questionnaire (23-item)<br/> SBT = STarT Back Tool<br/> *The questions were only to be answered if the patient was working. Calculation of missing data on those variables excludes: students, unemployed, early retirement/retirement and health-related retirement<br/> ** The questions were only to be answered if there was dominating back pain and the amount of missing data reported relative to that<br/> #Variables from the clinician-reported questionnaire. All other variables are from the patient self-reported baseline questionnaire</p> |  |  |  |  |                                                                                                                                                                                                                                                                                                                                           |  |  |

**Table 4. Participation domain**

| Variable                            | Abbreviated version of variable | Response options (range)                                                             | Data type | Missing observations, N (%) | Categorisation or reversing of variables (if performed)                                                                                              | Used in 'single-item' or 'summary-score' strategy | References |
|-------------------------------------|---------------------------------|--------------------------------------------------------------------------------------|-----------|-----------------------------|------------------------------------------------------------------------------------------------------------------------------------------------------|---------------------------------------------------|------------|
| Physical load at work               | Physical workload               | 1=sitting<br>2=sitting and walking<br>3=light physical load<br>4=heavy physical load | Ordinal   | 49 (5.3)                    |                                                                                                                                                      | Single-item & Summary-score                       | [22]       |
| Days with sick leave the last month | Days with sick leave last month | 0=0 days<br>1=1-5 days (workweek)<br>2=6-31 days                                     | Ordinal   | 46 (5.0)                    | <i>Original scale:</i><br>0-31 days, continuous scale (patient's noted a number themselves)<br><i>Comment:</i><br>Trichotomised before the LCA to an | Single-item & Summary-score                       |            |

|                                                                                                                                                                                 |                                      |                                                                                           |             |           |                                                                                                                                                                                                                                                                                          |               |                                  |
|---------------------------------------------------------------------------------------------------------------------------------------------------------------------------------|--------------------------------------|-------------------------------------------------------------------------------------------|-------------|-----------|------------------------------------------------------------------------------------------------------------------------------------------------------------------------------------------------------------------------------------------------------------------------------------------|---------------|----------------------------------|
|                                                                                                                                                                                 |                                      |                                                                                           |             |           | ordinal scale due to highly skewed data distribution (few observations had any days of sick leave)                                                                                                                                                                                       |               |                                  |
| I stay at home most of the time because of my back problem or leg pain (sciatica) (RMDQ-1)                                                                                      | Stay home most of the time           | 0=no<br>1=yes                                                                             | Dichotomous | 18 (1.9)  |                                                                                                                                                                                                                                                                                          | Single-item   | See RMDQ sum-score               |
| Because of my back problem, my sexual activity is decreased (RMDQ-20)                                                                                                           | Decreased sexual activity            | 0=no<br>1=yes                                                                             | Dichotomous | 31 (3.3)  |                                                                                                                                                                                                                                                                                          | Single-item   | See RMDQ sum-score               |
| My pain was caused by my work or by an accident at work (FABQ-6)                                                                                                                | Pain caused by work/accident at work | 0=disagree<br>1=unsure<br>2=agree                                                         | Ordinal     | 19* (2.1) | <i>Original scale:</i><br>0=completely disagree<br>3=unsure<br>6=completely agree<br><i>Comment:</i><br>Trichotomised before the LCA due to the highly skewed data distribution (few observations answering other than 'disagree'):<br>0=disagree (0-2)<br>1=unsure (3)<br>2=agree (4-6) | Single-item   | See FABQ-work sub scale          |
| My work aggravated my pain (FABQ-7)                                                                                                                                             | Work-aggravated pain                 | 0=disagree<br>1=unsure<br>2=agree                                                         | Ordinal     | 19*(2.1)  |                                                                                                                                                                                                                                                                                          | Single-item   | See FABQ-work sub scale          |
| My work is too heavy for me (FABQ-9)                                                                                                                                            | Work is too heavy                    | 0=disagree<br>1=unsure<br>2=agree                                                         | Ordinal     | 40* (4.7) |                                                                                                                                                                                                                                                                                          | Single-item   | See FABQ-work sub scale          |
| My work makes or would make my pain worse (FABQ-10)                                                                                                                             | Work makes/would make pain worse     | 0=disagree<br>1=unsure<br>2=agree                                                         | Ordinal     | 43*(5.1)  |                                                                                                                                                                                                                                                                                          | Single-item   | See FABQ-work sub scale          |
| Sum-score: Fear Avoidance Beliefs about work (FABQ-work) (Questions 6,7,9,10,11,12,15)<br><br>(FABQ-15 not used in the single-item strategy, but was part of the summary-score) | FABQ-work subscale                   | 0=no fear-avoidance beliefs<br>38=severe fear-avoidance beliefs (The whole range is used) | Continuous  | 55*(6.5)  |                                                                                                                                                                                                                                                                                          | Summary-score | Validity and reliability [10-12] |

LCA = Latent Class Analysis

FABQ-w = Fear-Avoidance Beliefs Questionnaire, work subscale

RMDQ = Roland-Morris Disability Questionnaire (23-item)

\*The questions were only to be answered if the patient was working. Calculation of missing data on those variables excludes: students, unemployed, early retirement/retirement and health-related retirement

## References

1. Linton SJ, Boersma K: **Early identification of patients at risk of developing a persistent back problem: the predictive validity of the Orebro Musculoskeletal Pain Questionnaire.** *Clin J Pain* 2003, **19(2)**:80-86.
2. Grotle M, Vollestad NK, Brox JI: **Screening for yellow flags in first-time acute low back pain: reliability and validity of a Norwegian version of the Acute Low Back Pain Screening Questionnaire.** *Clin J Pain* 2006, **22(5)**:458-467. doi:10.1097/01.ajp.0000208243.33498.cb.
3. Kamper SJ, Kongsted A, Haanstra TM, Hestbaek L: **Do recovery expectations change over time?** *Eur Spine J* 2015, **24(2)**:218-226. doi:DOI 10.1007/s00586-014-3380-1.
4. Kongsted A, Vach W, Axo M, Bech RN, Hestbaek L: **Expectation of recovery from low back pain: a longitudinal cohort study investigating patient characteristics related to expectations and the association between expectations and 3-month outcome.** *Spine (Phila Pa 1976)* 2014, **39(1)**:81-90. doi:10.1097/BRS.0000000000000059.
5. Kent P, Mirkhil S, Keating J, Buchbinder R, Manniche C, Albert HB: **The concurrent validity of brief screening questions for anxiety, depression, social isolation, catastrophization, and fear of movement in people with low back pain.** *Clin J Pain* 2014, **30(6)**:479-489. doi:10.1097/AJP.0000000000000010.
6. Hill JC, Dunn KM, Lewis M, Mullis R, Main CJ, Foster NE *et al*: **A primary care back pain screening tool: identifying patient subgroups for initial treatment.** *Arthritis Rheum* 2008, **59(5)**:632-641. doi:10.1002/art.23563.
7. Hill JC, Dunn KM, Main CJ, Hay EM: **Subgrouping low back pain: A comparison of the STarT Back Tool with the Örebro Musculoskeletal Pain Screening Questionnaire.** *Eur J Pain* 2010, **14(1)**:83-89. doi:10.1016/j.ejpain.2009.01.003.
8. Hill JC, Whitehurst DG, Lewis M, Bryan S, Dunn KM, Foster NE *et al*: **Comparison of stratified primary care management for low back pain with current best practice (STarT Back): a randomised controlled trial.** *Lancet* 2011, **378(9802)**:1560-1571. doi:10.1016/S0140-6736(11)60937-9.
9. Morso L, Albert H, Kent P, Manniche C, Hill J: **Translation and discriminative validation of the STarT Back Screening Tool into Danish.** *Eur Spine J* 2011, **20(12)**:2166-2173. doi:10.1007/s00586-011-1911-6.
10. Waddell G, Newton M, Henderson I, Somerville D, Main CJ: **A Fear-Avoidance Beliefs Questionnaire (FABQ) and the role of fear-avoidance beliefs in chronic low back pain and disability.** *Pain* 1993, **52(2)**:157-168.
11. Swinkels-Meewisse EJ, Swinkels RA, Verbeek AL, Vlaeyen JW, Oostendorp RA: **Psychometric properties of the Tampa Scale for kinesiophobia and the fear-avoidance beliefs questionnaire in acute low back pain.** *Man Ther* 2003, **8(1)**:29-36.
12. Grotle M, Brox JI, Vollestad NK: **Reliability, validity and responsiveness of the fear-avoidance beliefs questionnaire: methodological aspects of the Norwegian version.** *J Rehabil Med* 2006, **38(6)**:346-353. doi:10.1080/16501970600722403.
13. Olsen LR, Jensen DV, Noerholm V, Martiny K, Bech P: **The internal and external validity of the Major Depression Inventory in measuring severity of depressive states.** *Psychol Med* 2003, **33(2)**:351-356.
14. Jensen MP, Turner JA, Romano JM, Fisher LD: **Comparative reliability and validity of chronic pain intensity measures.** *Pain* 1999, **83(2)**:157-162.

15. Bolton JE, Wilkinson RC: **Responsiveness of pain scales: a comparison of three pain intensity measures in chiropractic patients.** *J Manipulative Physiol Ther* 1998, **21(1)**:1-7.
16. Dunn KM, Jordan K, Croft PR: **Characterizing the course of low back pain: a latent class analysis.** *Am J Epidemiol* 2006, **163(8)**:754-761. doi:10.1093/aje/kwj100.
17. Palos GR, Mendoza TR, Mobley GM, Cantor SB, Cleeland CS: **Asking the community about cutpoints used to describe mild, moderate, and severe pain.** *J Pain* 2006, **7(1)**:49-56. doi:10.1016/j.jpain.2005.07.012.
18. Petersen T, Olsen S, Laslett M, Thorsen H, Manniche C, Ekdahl C *et al*: **Inter-tester reliability of a new diagnostic classification system for patients with non-specific low back pain.** *Aust J Physiother* 2004, **50(2)**:85-94.
19. Petersen T, Laslett M, Thorsen H, Manniche C, Ekdahl C, Jacobsen S: **Diagnostic classification of non-specific low back pain. A new system integrating patho-anatomic and clinical categories.** *Physiother Theory Pract* 2003, **19(4)**:213-237. doi:10.1080/091593980390246760.
20. Albert HB, Jensen AM, Dahl D, Rasmussen MN: **[Criteria validation of the Roland Morris questionnaire. A Danish translation of the international scale for the assessment of functional level in patients with low back pain and sciatica].** *Ugeskr Laeger* 2003, **165(18)**:1875-1880.
21. Kent P, Lauridsen HH: **Managing missing scores on the Roland Morris Disability Questionnaire.** *Spine (Phila Pa 1976)* 2011, **36(22)**:1878-1884. doi:10.1097/BRS.0b013e3181ffe53f.
22. Saltin B, Grimby G: **Physiological analysis of middle-aged and old former athletes. Comparison with still active athletes of the same ages.** *Circulation* 1968, **38(6)**:1104-1115. doi:10.1161/01.CIR.38.6.1104.
