# Supplementary material
Source: publisher site journal article supplement (https://www.dovepress.com/article/103330)
Supplement: Supplementary file 2 [file get_supplementary_file.php]

## Additional file 2

**Table 1. Statistical characteristics for identified subgroup models based on the summary score strategy**

Subgroup models were identified for four different health domains (psychology, pain, activity and participation)

| Health domain | Sub-groups | Parameters | Log-likelihood  | BIC <sub>LL</sub> | % change of BIC <sub>LL</sub> | Frequency of presented BIC | Size of smallest subgroup, N (%) |
|---------------|------------|------------|-----------------|-------------------|-------------------------------|----------------------------|----------------------------------|
| Psychology    | 1          | 17         | -12900.8        | 25917.9           |                               | 10/10                      | 928 (100)                        |
|               | 2          | 30         | -12124.3        | 24453.5           | 5.65                          | 8/10                       | 334 (36.0)                       |
|               | 3          | 43         | <i>-11803.1</i> | <i>23900.0</i>    | 2.26                          | <i>10/10</i>               | <i>237 (25.5)</i>                |
|               | 4          | 56         | -11693.7        | 23770.0           | 0.54                          | 10/10                      | 103 (11.1)                       |
|               | 5          | 69         | -11596.3        | 23664.0           | 0.45                          | 9/10                       | 84 (9.05)                        |
|               | <b>6</b>   | <b>82</b>  | <b>-11542.2</b> | <b>23644.7</b>    | <b>0.08</b>                   | <b>4/10</b>                | <b>34 (3.66)</b>                 |
|               | 7          | 95         | -11378.6        | 23406.4           | 1.01                          | 1/10                       | 60 (6.5)                         |
|               | 8          | 108        | -11320.0        | 23377.9           | 0.12                          | 1/10                       | 4 (0.39)                         |
|               | 9          | 121        | -11261.6        | 23350.0           | 0.12                          | 1/10                       | 9 (0.95)                         |
|               | <u>10</u>  | <u>134</u> | <u>-11094.5</u> | <u>23104.7</u>    | <u>1.05</u>                   | <u>1/10</u>                | <u>38 (4.07)</u>                 |
|               | 11         | 147        | -11113.1        | 23230.7           | -0.55                         | 1/10                       | 9 (1.00)                         |
|               | 12         | 160        | -11020.0        | 23133.3           | 0.42                          | 1/10                       | 7 (0.71)                         |
| Pain          | 1          | 21         | -8470.8         | 17085.2           |                               | 10/10                      | 928 (100)                        |
|               | 2          | 34         | <i>-8206.8</i>  | <i>16645.8</i>    | 2.57                          | <i>10/10</i>               | <i>320 (34.5)</i>                |
|               | 3          | 47         | -8083.1         | 16487.4           | 0.95                          | 10/10                      | 133 (14.4)                       |
|               | 4          | 60         | -8004.0         | 16418.0           | 0.42                          | 10/10                      | 125 (13.5)                       |
|               | <u>5</u>   | <u>73</u>  | <u>-7936.6</u>  | <u>16372.1</u>    | <u>0.28</u>                   | <u>10/10</u>               | <u>75 (8.1)</u>                  |
|               | <b>6</b>   | <b>86</b>  | <b>-7899.8</b>  | <b>16387.2</b>    | <b>-0.09</b>                  | <b>9/10</b>                | <b>50 (5.3)</b>                  |
|               | 7          | 99         | -7877.7         | 16431.8           | -0.27                         | 4/10                       | 40 (4.3)                         |
|               | 8          | 112        | -7862.1         | 16489.4           | -0.35                         | 3/10                       | 41 (4.5)                         |
| Activity      | 1          | 6          | -5810.6         | 11662.3           |                               | 10/10                      | 928 (100)                        |
|               | <u>2</u>   | <u>12</u>  | <u>-5671.2</u>  | <u>11424.4</u>    | <u>2.04</u>                   | <u>10/10</u>               | <u>364 (39.3)</u>                |
|               | 3          | 18         | -5652.1         | 11427.1           | -0.02                         | 10/10                      | 166 (17.8)                       |
|               | 4          | 24         | -5645.8         | 11455.5           | -0.25                         | 5/10                       | 103 (11.1)                       |
|               | 5          | 30         | -5638.1         | 11481.3           | -0.22                         | 4/10                       | 49 (5.3)                         |
|               | 6          | 36         | -5634.3         | 11514.7           | -0.29                         | 6/10                       | 47 (5.0)                         |
|               | <b>7</b>   | <b>42</b>  | <b>-5632.7</b>  | <b>11552.3</b>    | <b>-0.33</b>                  | <b>4/10</b>                | <b>83 (8.9)</b>                  |
|               | 8          | 48         | -5628.8         | 11585.5           | -0.29                         | 3/10                       | 56 (6.0)                         |
|               | 9          | 54         | -5625.3         | 11619.5           | -0.29                         | 3/10                       | 48 (5.2)                         |
| Participation | 1          | 7          | -4591.6         | 9231.0            |                               | 10/10                      | 928 (100)                        |
|               | 2          | 12         | <i>-4389.3</i>  | <i>8860.6</i>     | 4.01                          | <i>10/10</i>               | <i>335 (36.1)</i>                |
|               | <u>3</u>   | <u>17</u>  | <u>-4356.3</u>  | <u>8828.8</u>     | <u>0.36</u>                   | <u>10/10</u>               | <u>251 (27.1)</u>                |
|               | 4          | 22         | -4349.9         | 8850.2            | -0.24                         | 4/10                       | 135 (14.6)                       |
|               | <b>5</b>   | <b>27</b>  | <b>-4341.5</b>  | <b>8867.4</b>     | <b>-0.19</b>                  | <b>7/10</b>                | <b>96 (10.4)</b>                 |
|               | 6          | 32         | -4319.1         | 8856.8            | 0.12                          | 7/10                       | 52 (5.7)                         |
|               | 7          | 37         | -4304.0         | 8860.8            | -0.04                         | 3/10                       | 62 (6.7)                         |

BIC = Bayesian Information Criterion. %-change of BIC: A positive change represents a reduction of BIC

*Italics*: Selected starting model improving BIC by at least 1%

**Bold**: Preferred subgroup model

Underline: Best model if based only on lowest BIC

Additional results are available on request from the first author.

**Table 2. Statistical characteristics for identified subgroup models based on the single item strategy**

Subgroup models were identified for four different health domains (psychology, pain, activity and participation)

| Health domain | Sub-groups | Parameters | Log-likelihood  | BIC <sub>LL</sub> | % change of BIC <sub>LL</sub> | Frequency of presented BIC | Size of smallest subgroup, N (%) |
|---------------|------------|------------|-----------------|-------------------|-------------------------------|----------------------------|----------------------------------|
| Psychology    | 1          | 68         | -25490.4        | 51445.5           |                               | 10/10                      | 928 (100)                        |
|               | 2          | 97         | -24031.8        | 48726.4           | 5.29                          | 10/10                      | 369 (39.8)                       |
|               | 3          | <i>126</i> | <i>-23465.9</i> | <i>47792.7</i>    | <i>1.92</i>                   | <i>10/10</i>               | <i>228 (24.5)</i>                |
|               | 4          | 155        | -23154.5        | 47368.1           | 0.89                          | 10/10                      | 166 (17.9)                       |
|               | 5          | 184        | -22916.2        | 47089.6           | 0.59                          | 6/10                       | 98 (10.51)                       |
|               | 6          | 213        | -22775.7        | 47006.9           | 0.18                          | 4/10                       | 100 (10.77)                      |
|               | 7          | 242        | -22658.2        | 46970.0           | 0.08                          | 4/10                       | 85 (9.12)                        |
|               | <b>8</b>   | <b>271</b> | <b>-22526.3</b> | <b>46904.3</b>    | <b>0.14</b>                   | <b>8/10</b>                | <b>47 (5.1)</b>                  |
|               | 9          | 300        | -22434.3        | 46918.4           | -0.03                         | 7/10                       | 43 (4.6)                         |
|               | 10         | 329        | -22367.8        | 46983.7           | -0.14                         | 1/10                       | 12 (1.3)                         |
| Pain          | 1          | 31         | -12610.8        | 25433.4           |                               | 10/10                      | 928 (100)                        |
|               | 2          | 49         | -12058.0        | 24450.8           | 3.86                          | 10/10                      | 440 (47.4)                       |
|               | 3          | 67         | -11877.7        | 24213.3           | 0.97                          | 10/10                      | 229 (24.7)                       |
|               | 4          | 85         | -11767.5        | 24115.8           | 0.40                          | 10/10                      | 127 (13.7)                       |
|               | 5          | 103        | -11662.6        | 24028.9           | 0.36                          | 9/10                       | 105 (11.3)                       |
|               | <u>6</u>   | <u>121</u> | <u>-11568.4</u> | <u>23963.7</u>    | <u>0.27</u>                   | <u>9/10</u>                | <u>84 (9.0)</u>                  |
|               | <b>7</b>   | <b>139</b> | <b>-11522.2</b> | <b>23994.1</b>    | <b>-0.13</b>                  | <b>5/10</b>                | <b>41 (4.4)</b>                  |
|               | 8          | 157        | -11486.6        | 24045.9           | -0.22                         | 3/10                       | 42 (4.5)                         |
|               | 9          | 175        | -11441.3        | 24078.4           | -0.13                         | 6/10                       | 38 (4.1)                         |
| Activity      | 1          | 28         | -13280.5        | 26752.3           |                               | 10/10                      | 928 (100)                        |
|               | 2          | 51         | -11463.4        | 23275.2           | 13.00                         | 10/10                      | 424 (45.7)                       |
|               | 3          | 74         | -11152.4        | 22810.4           | 2.00                          | 10/10                      | 207 (22.3)                       |
|               | 4          | 97         | -10982.5        | 22627.8           | 0.80                          | 10/10                      | 126 (13.6)                       |
|               | <u>5</u>   | <u>120</u> | <u>-10848.2</u> | <u>22516.3</u>    | <u>0.49</u>                   | <u>10/10</u>               | <u>145 (15.6)</u>                |
|               | 6          | 143        | -10780          | 22537.1           | -0.09                         | 10/10                      | 59 (6.4)                         |
|               | <b>7</b>   | <b>166</b> | <b>-10721.6</b> | <b>22577.5</b>    | <b>-0.18</b>                  | <b>9/10</b>                | <b>50 (5.4)</b>                  |
|               | 8          | 189        | -10672.8        | 22637.0           | -0.26                         | 2/10                       | 38 (4.1)                         |
|               | 9          | 212        | -10624.6        | 22697.8           | -0.27                         | 2/10                       | 38 (4.1)                         |
| Participation | 1          | 15         | -5870.3         | 11843.1           |                               | 10/10                      | 928 (100)                        |
|               | 2          | 24         | -5429.4         | 11022.9           | 6.93                          | 10/10                      | 376 (40.5)                       |
|               | 3          | 33         | -5343.4         | 10912.2           | 1.00                          | 10/10                      | 173 (18.6)                       |
|               | <u>4</u>   | <u>42</u>  | <u>-5284.7</u>  | <u>10856.3</u>    | <u>0.51</u>                   | <u>10/10</u>               | <u>148 (16.0)</u>                |
|               | 5          | 51         | -5261.3         | 10871.1           | -0.14                         | 6/10                       | 94 (10.2)                        |
|               | 6          | 60         | -5232.4         | 10874.8           | -0.03                         | 6/10                       | 77 (8.3)                         |
|               | <b>7</b>   | <b>69</b>  | <b>-5213.7</b>  | <b>10898.8</b>    | <b>-0.22</b>                  | <b>5/10</b>                | <b>63 (6.8)</b>                  |
|               | 8          | 78         | -5192.3         | 10917.5           | -0.17                         | 4/10                       | 47 (5.0)                         |
|               | 9          | 87         | -5178.2         | 10950.9           | -0.31                         | 7/10                       | 47 (5.1)                         |

BIC = Bayesian Information Criterion. %-change of BIC: A positive change represents a reduction of BIC

*Italics*: Selected starting model improving BIC by at least 1%

**Bold**: Preferred subgroup model

Underline: Best model if based only on lowest BIC

Shown are results of model sizes up to preferred model plus two. Additional results are available on request from the first author.
