# Supplementary material
Source: publisher site journal article supplement (https://www.dovepress.com/article/103330)
Supplement: Supplementary file 3 [file get_supplementary_file.php]

## Additional file 3

### Selecting the preferred model for the four health domains in the summary-score strategy based on

- Profile plots (from Latent GOLD): The Profile Plot is constructed from the conditional probabilities for the nominal variables and means for the other indicators as displayed in the columns of the Profile table ('profile in numbers'). The quantities associated with the clusters are plotted and connected to form a line graph.
  - For the scale types ordinal and continuous, prior to plotting the class-specific means, they are re-scaled to always lie within the 0-1 range. Scaling of these "0-1 Means" is accomplished by subtracting the lowest observed value from the class-specific means and dividing the results by the range, which is simply the difference between the highest and the lowest observed value. The advantage of such scaling is that these numbers can be depicted on the same scale as the class-specific probabilities for nominal variables
  - For nominal variables containing more than 2 categories, all categories are displayed simultaneously.
  - For dichotomous variables specified as nominal, by default only the last category is displayed.
  - A separate line is displayed for each cluster
  - Lowest cluster size is noted and consistency of BIC (Bayesian Information Criterion) for selected models
  - Brief descriptions of subgroups are included for selected models
  - Used synonyms for subgroup: domain profile (DP), cluster, class
- Profiles in numbers (conditional probabilities from Latent GOLD)
- Loadings (from Latent GOLD)

## Psychology domain – summary-score strategy

**Profile-plots:** Results with 3 to 10 domain profiles based on the following variables:

|           |                                                                                                                                                                                                                                                                                                                                                                                                                                                                                                                       |
|-----------|-----------------------------------------------------------------------------------------------------------------------------------------------------------------------------------------------------------------------------------------------------------------------------------------------------------------------------------------------------------------------------------------------------------------------------------------------------------------------------------------------------------------------|
| Okon0     | On an average day, what are your possibilities of handling or controlling your pain? (0= no possibility, 10= complete control)                                                                                                                                                                                                                                                                                                                                                                                        |
| Okom0     | How big is the chance of you being recovered within 3 months? (0=high chance, 1= Little or no chance)                                                                                                                                                                                                                                                                                                                                                                                                                 |
| Oens0     | To what extent do you feel lonely? (0=not lonely, 1=little to very lonely)                                                                                                                                                                                                                                                                                                                                                                                                                                            |
| Obeh0     | How well do you agree: Treatment is crucial to reduce my pain? (0=fully agree, 10=fully disagree)                                                                                                                                                                                                                                                                                                                                                                                                                     |
| SBT_score | Sum-score' representing all questions related to the STarT Back Tool (9 questions) (1=high risk)                                                                                                                                                                                                                                                                                                                                                                                                                      |
| Fabqpa    | Sum-score representing the following items from the Fear Avoidance Beliefs Questionnaire: 2,3,4,5 (0-24) FABQ2:<br>Physical activity makes my pain worse (0=disagree, 3 = don't know, 6=agree)<br>FABQ3: Physical activity might harm my back (0=disagree, 3= don't know, 6=agree)<br>FABQ4: I should not do physical activities which (might) make my pain worse (0=disagree, 3= don't know, 6=agree)<br>FABQ5: I cannot do physical activities which (might) make my pain worse (0=disagree, 3=don't know, 6=agree) |
| Fabq140   | I cannot do my normal work till my pain is treated (0=disagree, 6 = agree)                                                                                                                                                                                                                                                                                                                                                                                                                                            |
| Mdi_tot   | Sum-score representing the Major Depression Inventory (10 questions)                                                                                                                                                                                                                                                                                                                                                                                                                                                  |

### AMN's suggestion on final model: 6 domain profiles (clusters)

Cluster 1: Believe in recovery, not lonely, treatment IS crucial

Cluster 2: Slightly displeased, treatment IS NOT crucial

Cluster 3: The positives – control of pain, can work despite pain and not depressed

Cluster 4: Slightly displeased, treatment IS fairly crucial

Cluster 5: The lonely and depressed patients

Cluster 6: The depressed patients in the high risk group with high activity limitation and unable to work because of pain

### Facts:

Lowest cluster size = 3.66 % (equals approx. 34 patients out of the 928 included)

The seed number used was based on a BIC appearing 4 out of 10 rounds within the statistical analysis

**Psychology domain, summary-score, 3-domain profiles**

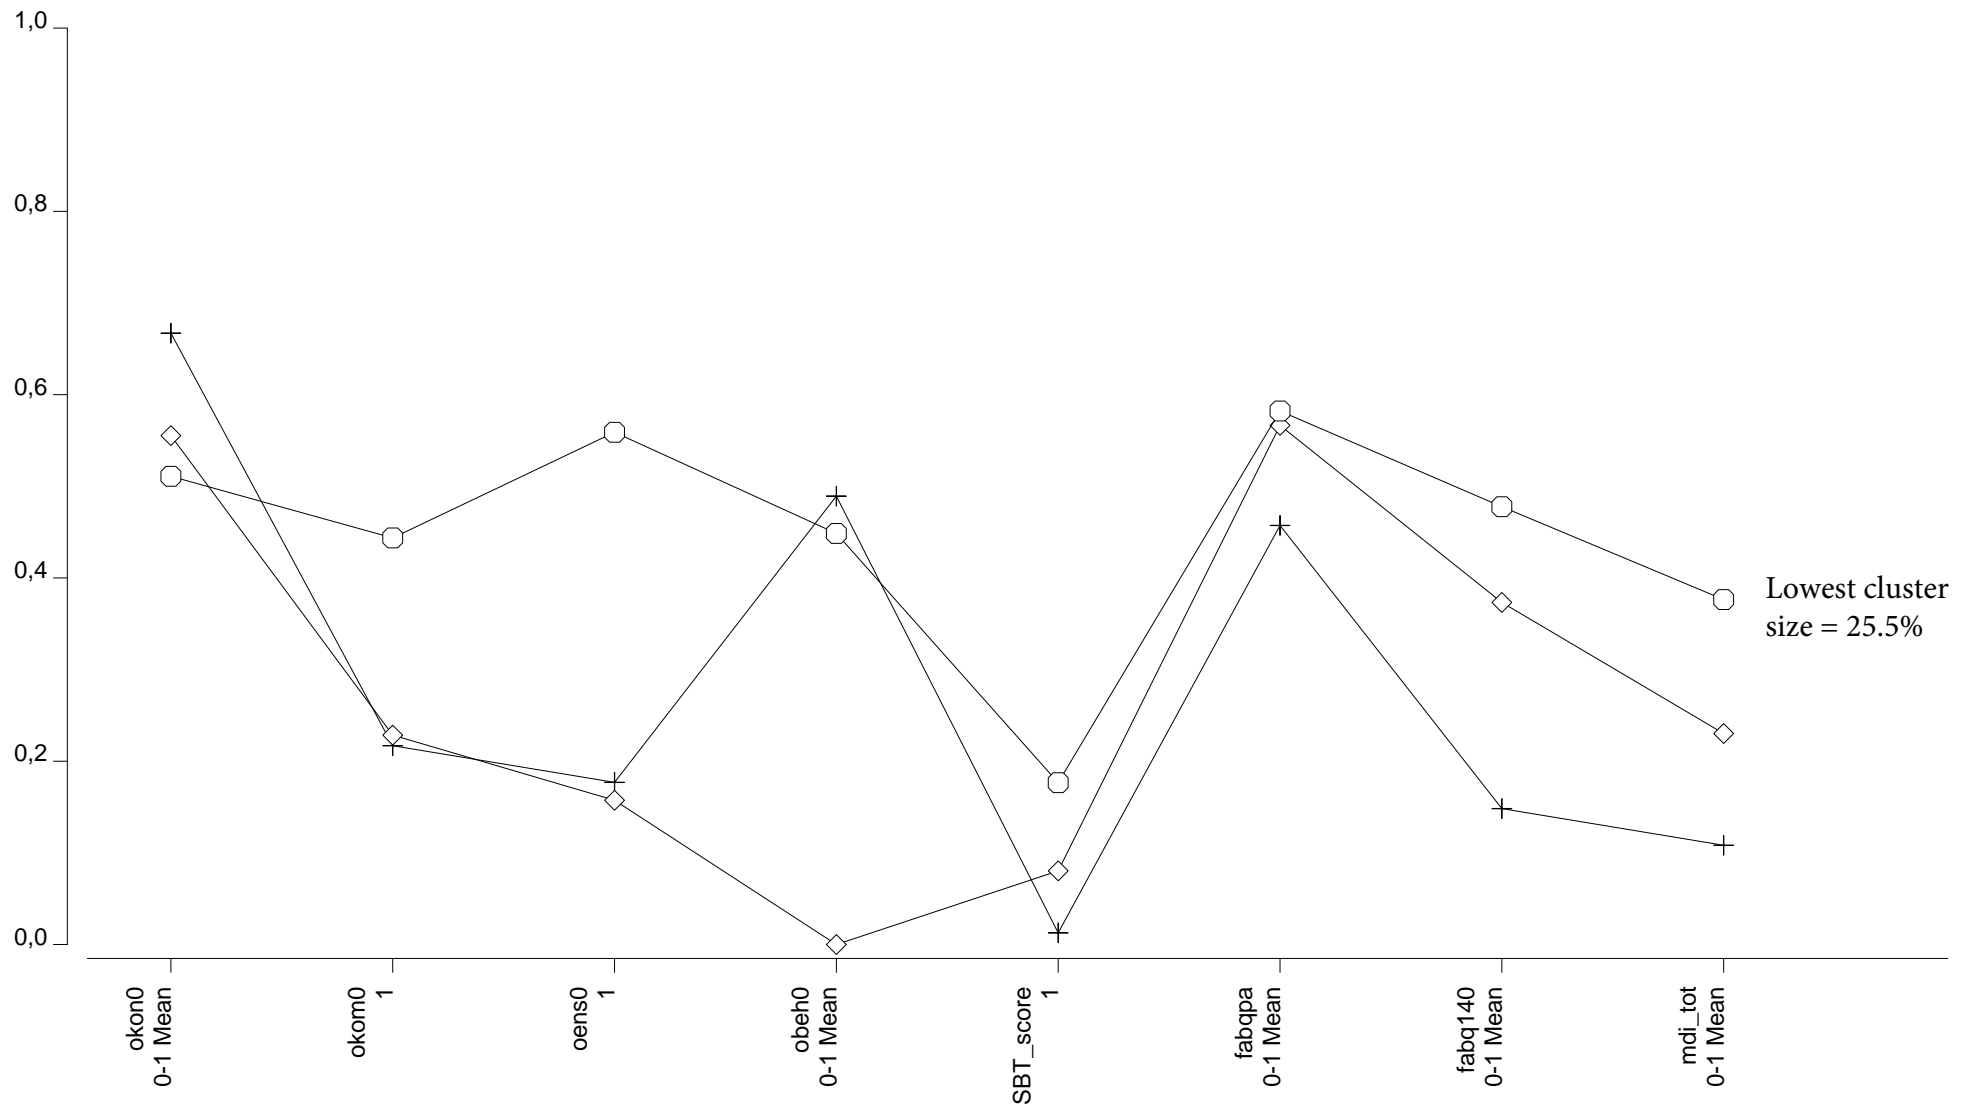

Lowest cluster size = 25.5%

- Cluster1 + **Cluster 1: Believe in recovery within 3 months, not lonely, treatment is not crucial to reduce pain and not depressed**
- Cluster2 ◇ **Cluster 2: Believe in recovery within 3 months, not lonely, treatment IS crucial to reduce pain and not depressed**
- Cluster3 ○ **Cluster 3: Doubt if recovered within 3 months, a little lonely, treatment is not crucial to reduce pain and slightly/moderately depressed**

Psychology domain, summary-score, 4-domain profiles

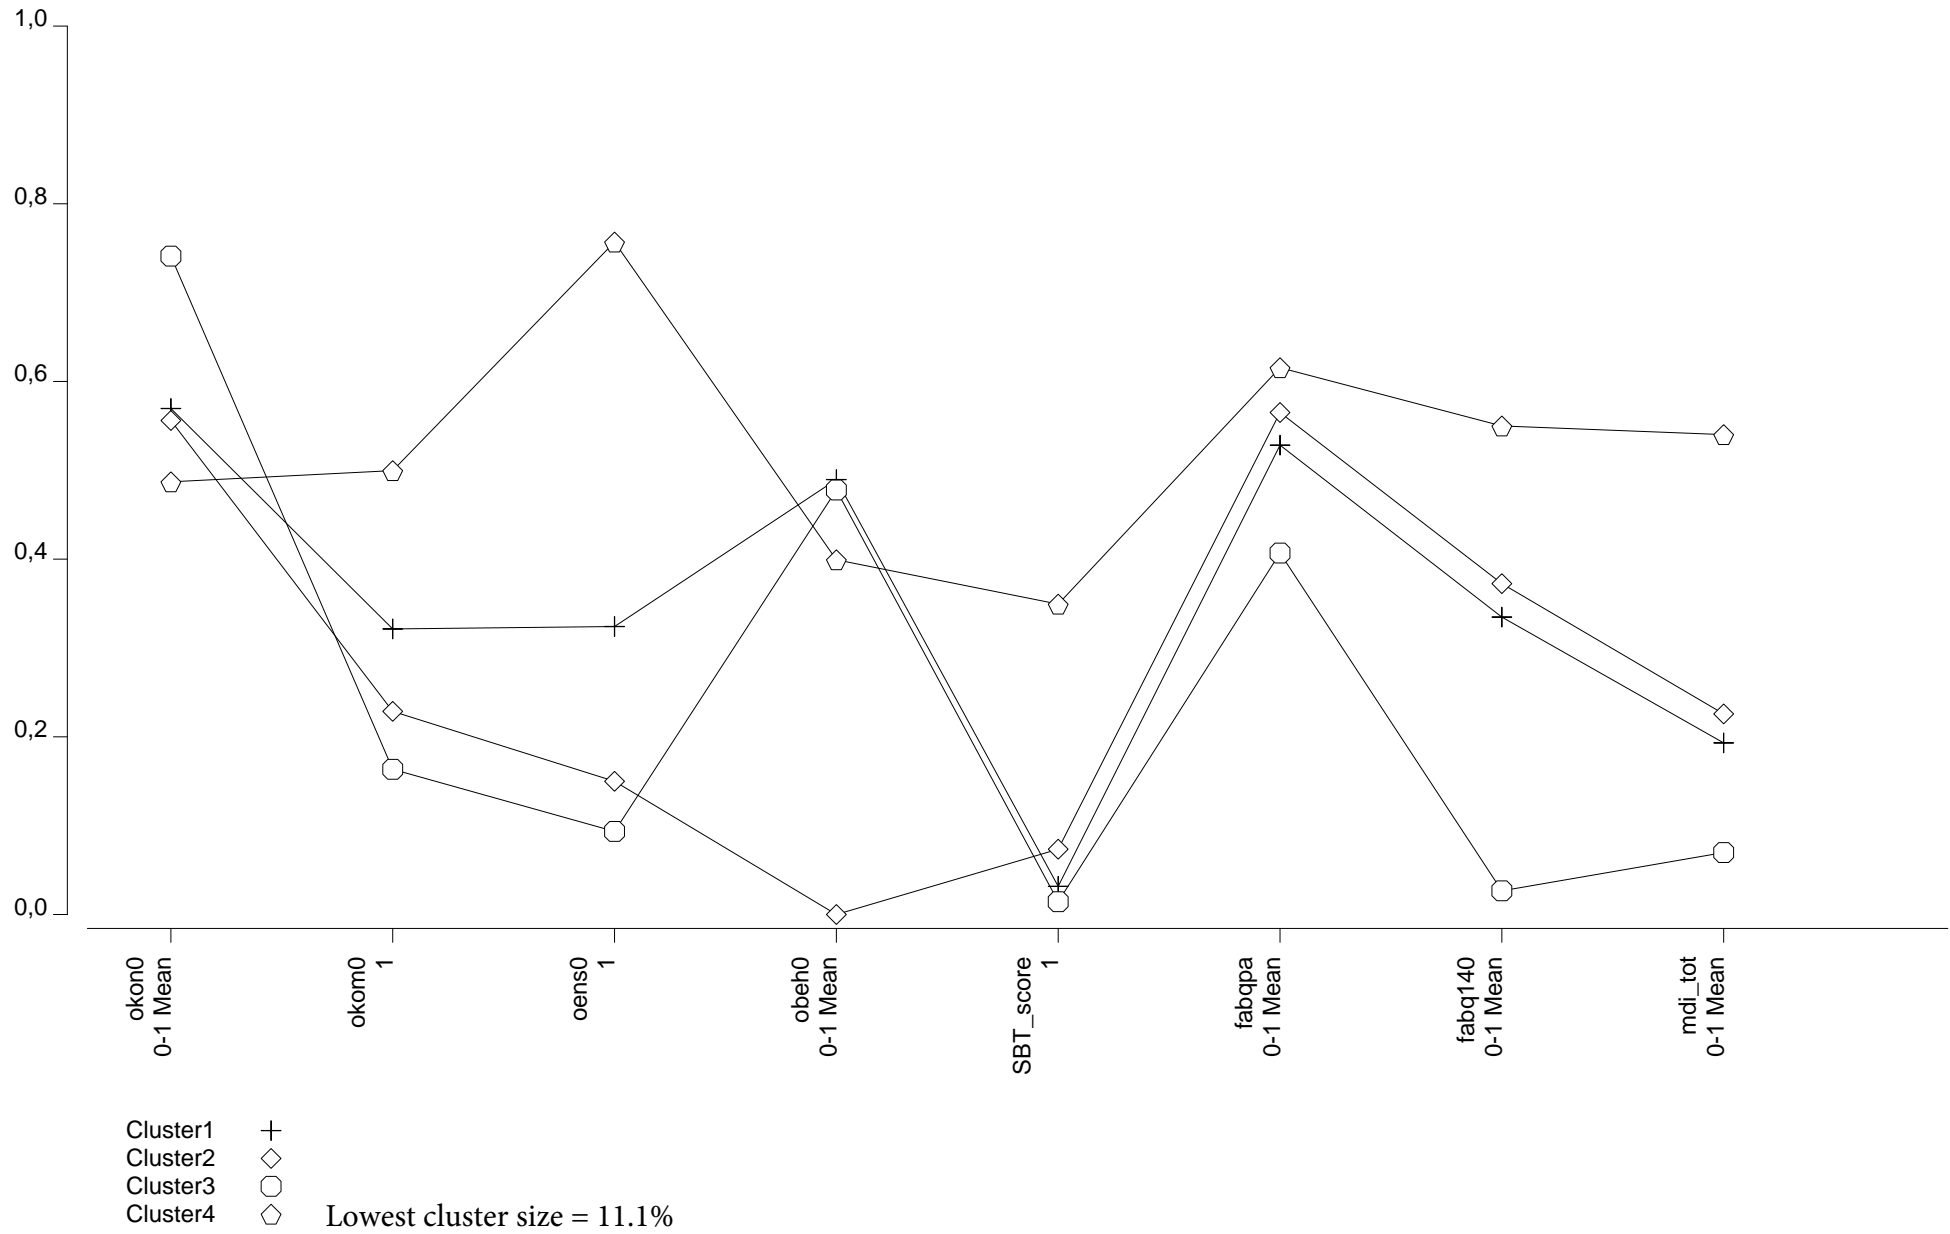

Psychology domain, summary-scores, 5-domain profiles,

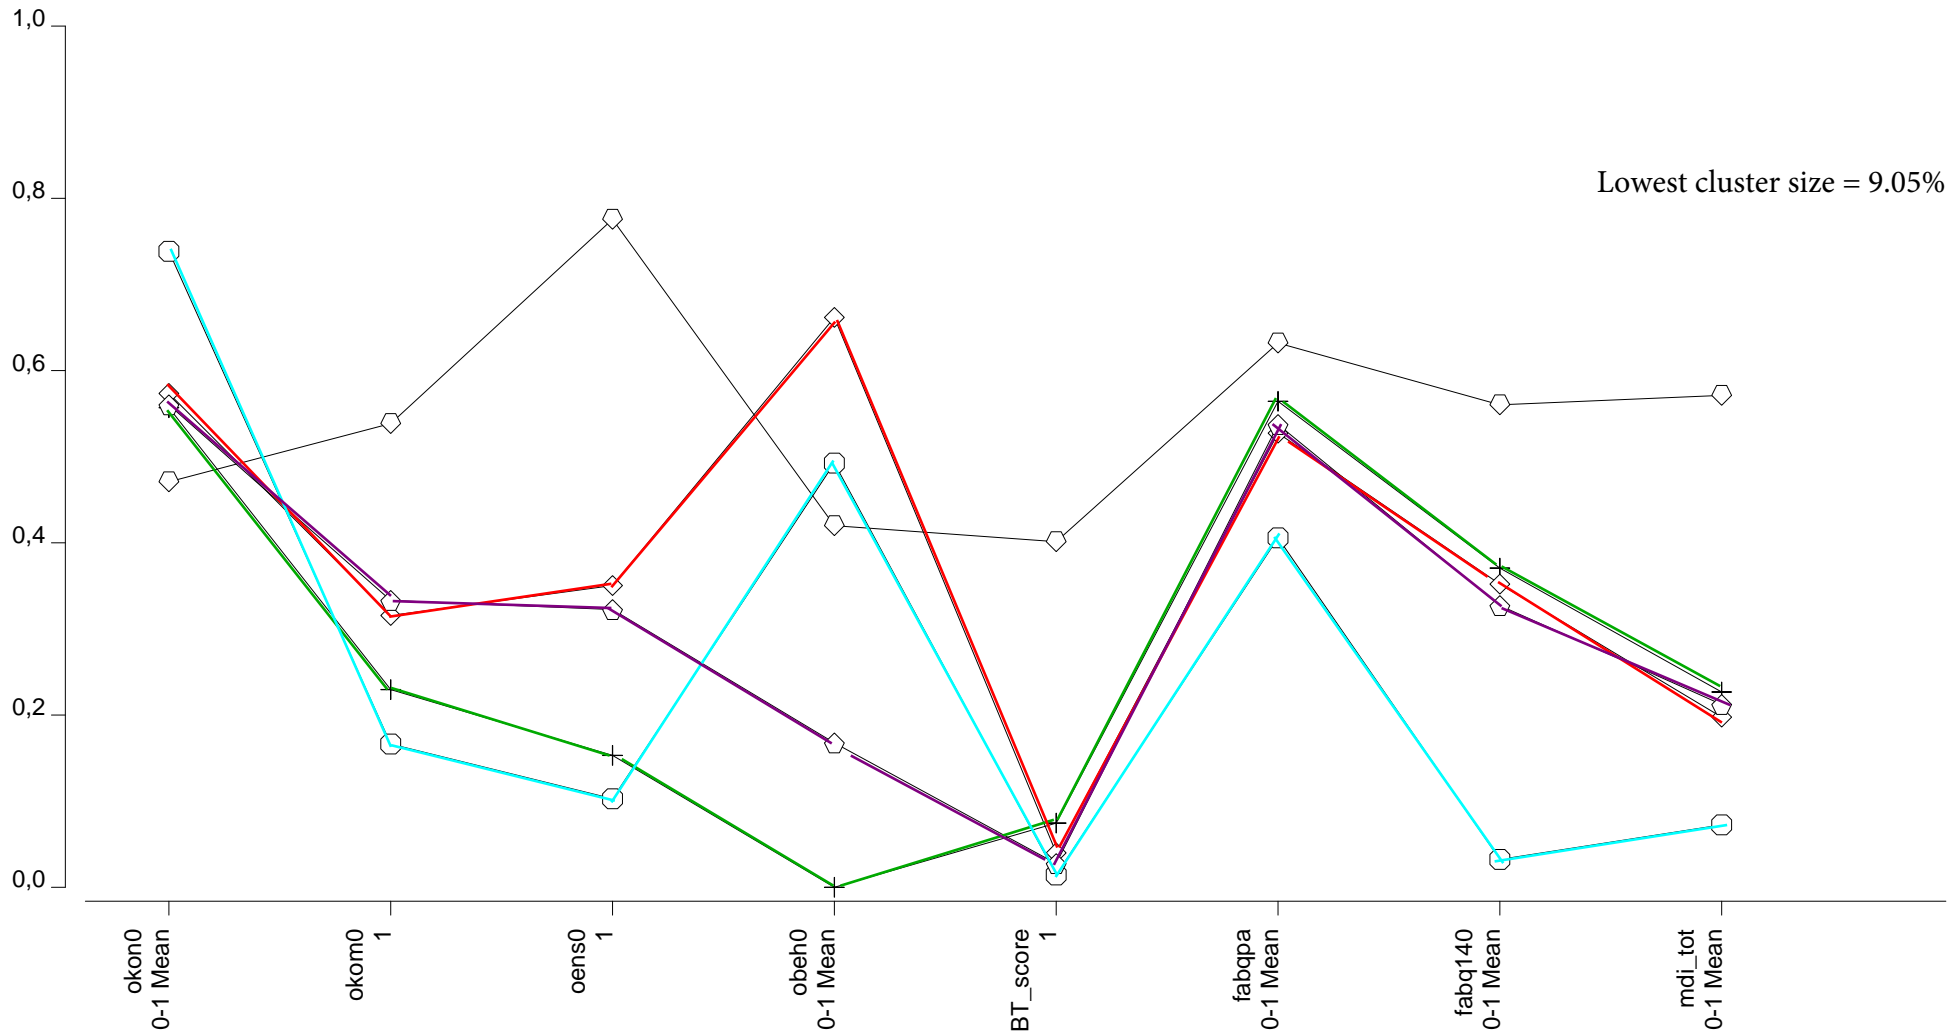

Lowest cluster size = 9.05%

- Cluster1: believe in recovery, not lonely, treatment IS crucial, low risk group (SBT), slightly depressed (=cluster 2, 3class model)
- Cluster2: might believe in recovery, slightly lonely, treatment IS NOT crucial, low risk group (SBT), slightly depressed. Similar to cluster 1, but less chance of recovery and slightly lonely and treatment IS NOT crucial.
- Cluster3: control of pain, believe in recovery, not lonely, low risk group (SBT), low activity limitation, not depressed (=cluster 1, 3-class model)
- Cluster4: might recover, slightly lonely, treatment only slightly crucial, low risk group (SBT), slightly depressed. Similar to cluster 2, but differs on 'treatment variable' - treatment is fairly crucial for this cluster
- Cluster5: some control of pain, doubt if recovered, lonely, treatment might help, high risk (SBT), activity limitation, might not be able to work before pain is treated, depressed (=cluster 3, 3class model, but more outstanding = less believe in recovery, more lonely, more depressed, high risk group (SBT), can't work before pain is treated, more depressed

Psychology domain, summary-scores, 6 domain profiles

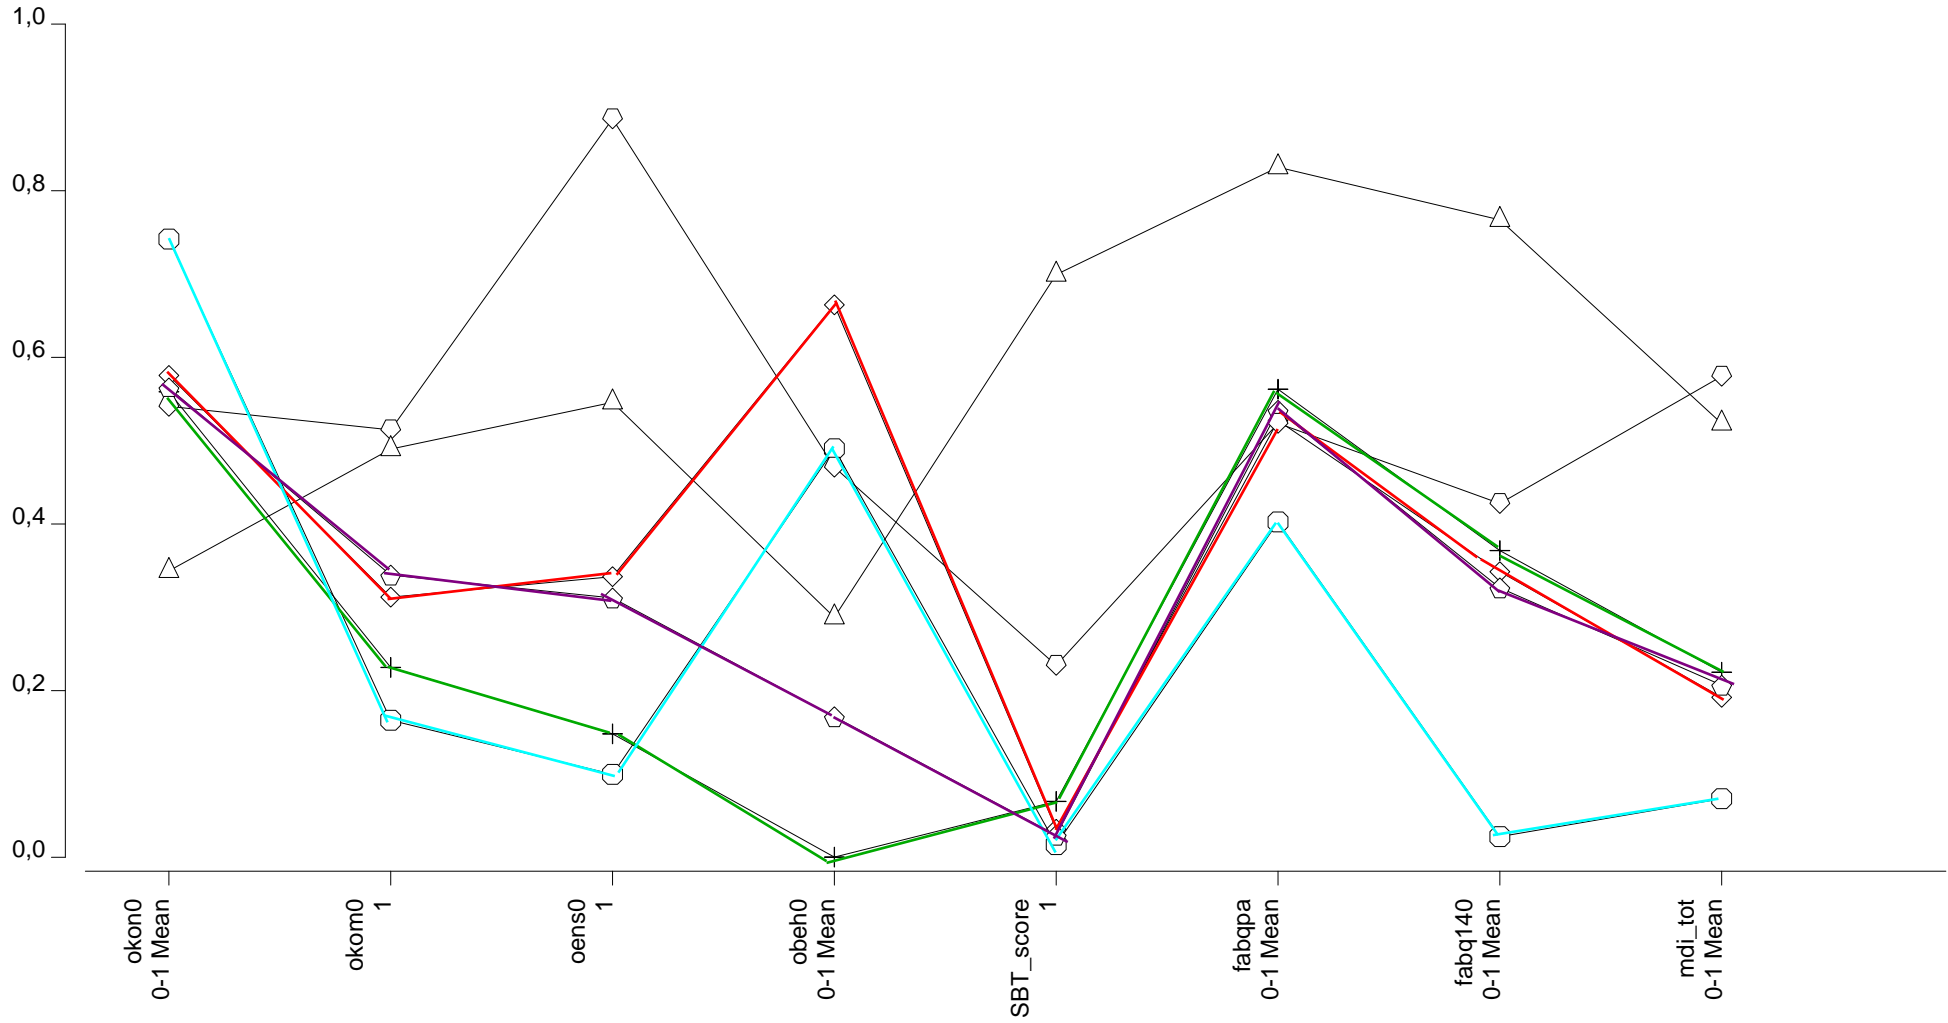

- Cluster1 +
- Cluster2 ◊
- Cluster3 ○
- Cluster4 ◊
- Cluster5 ◊
- Cluster6 △

Equals the 5-domain profiles model, BUT the 'depressed' cluster 5 is now split into two different clusters :  
 - cluster 5 being worse off in relation to loneliness  
 - cluster 6 being worse off in relation to the SBT Score (high risk) and afraid of physical activity/cannot work

Lowest cluster size = 3.66%

Psychology domain, summary-score, 7-domain profiles

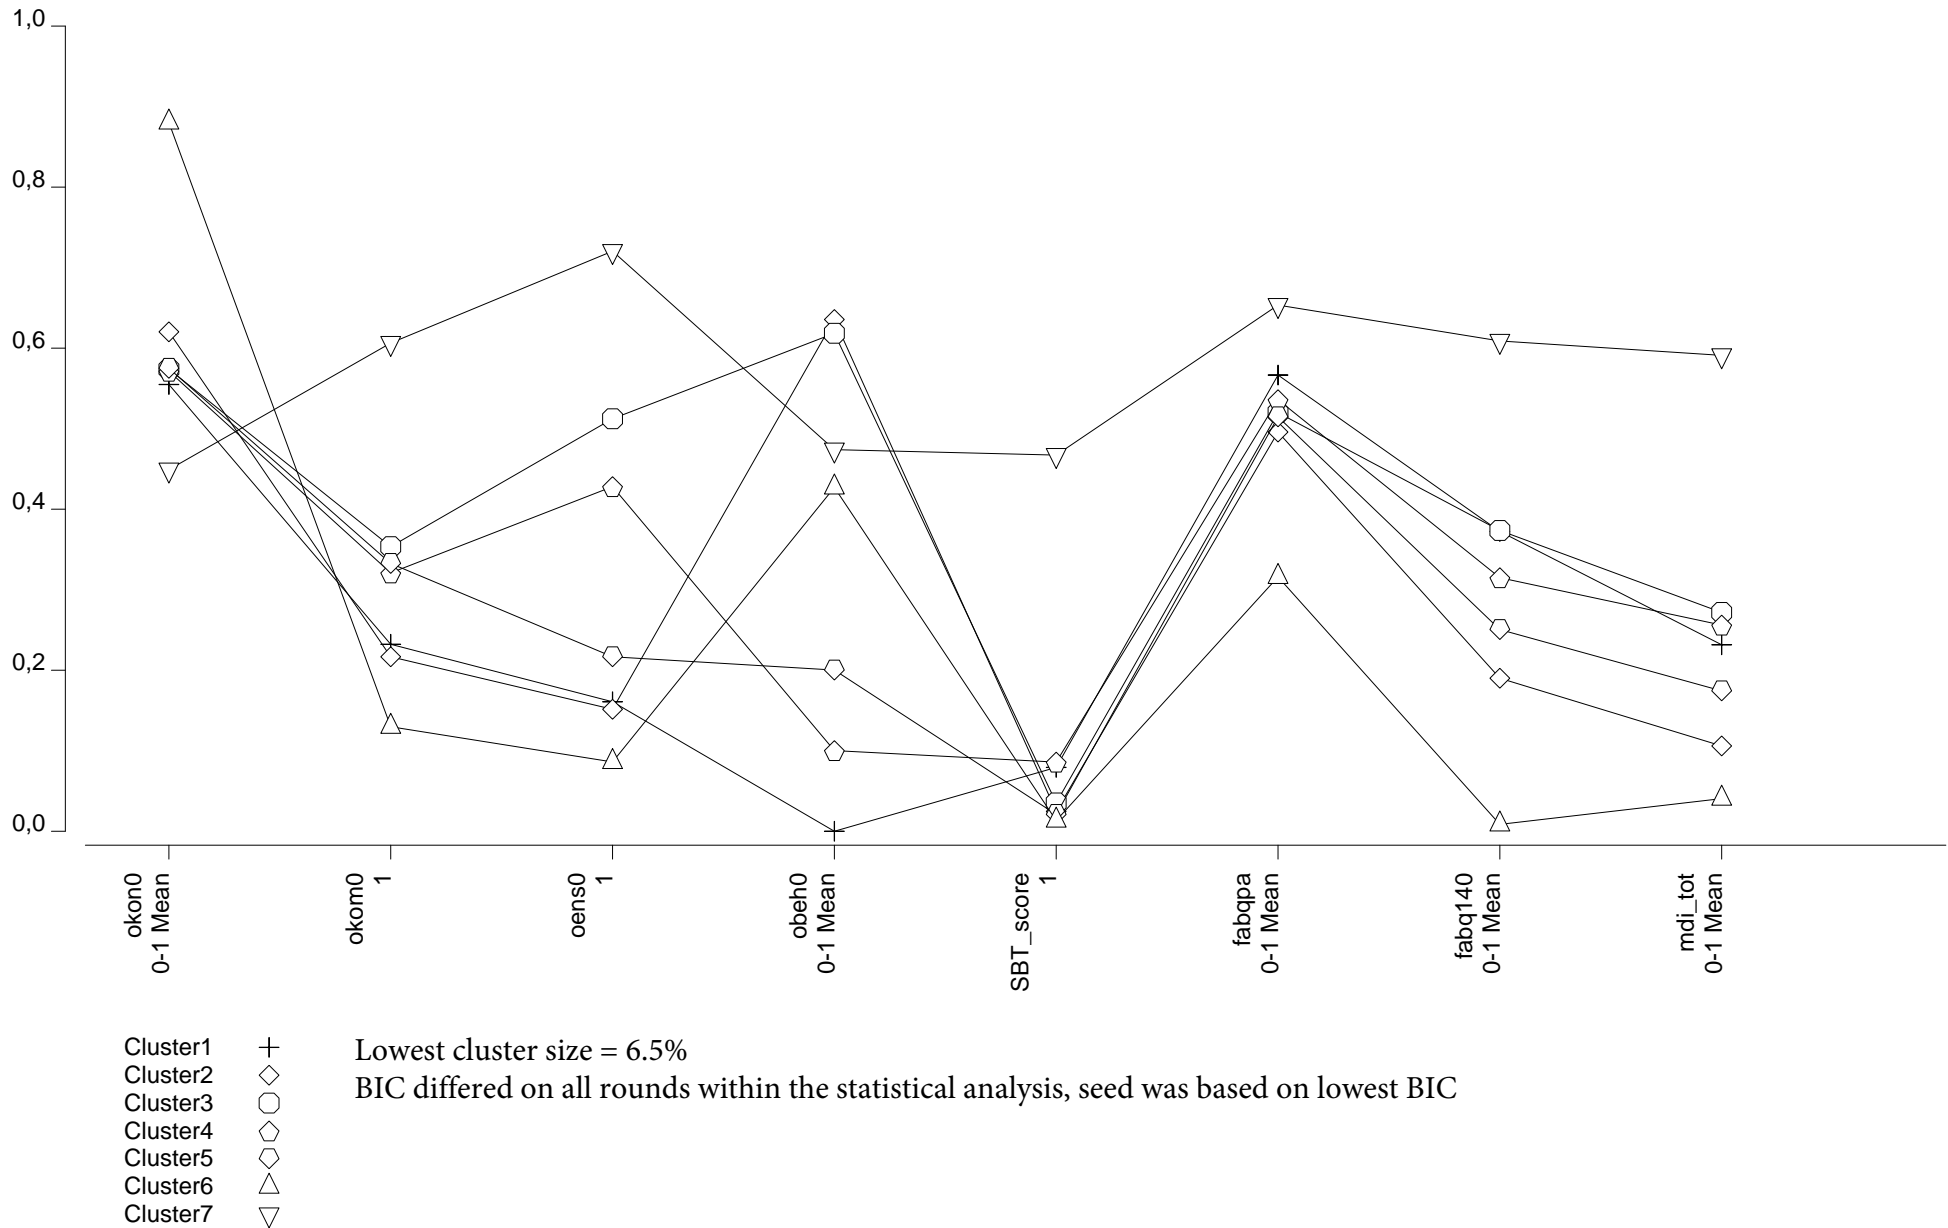

Psychology domain, summary-score, 8-domain profiles

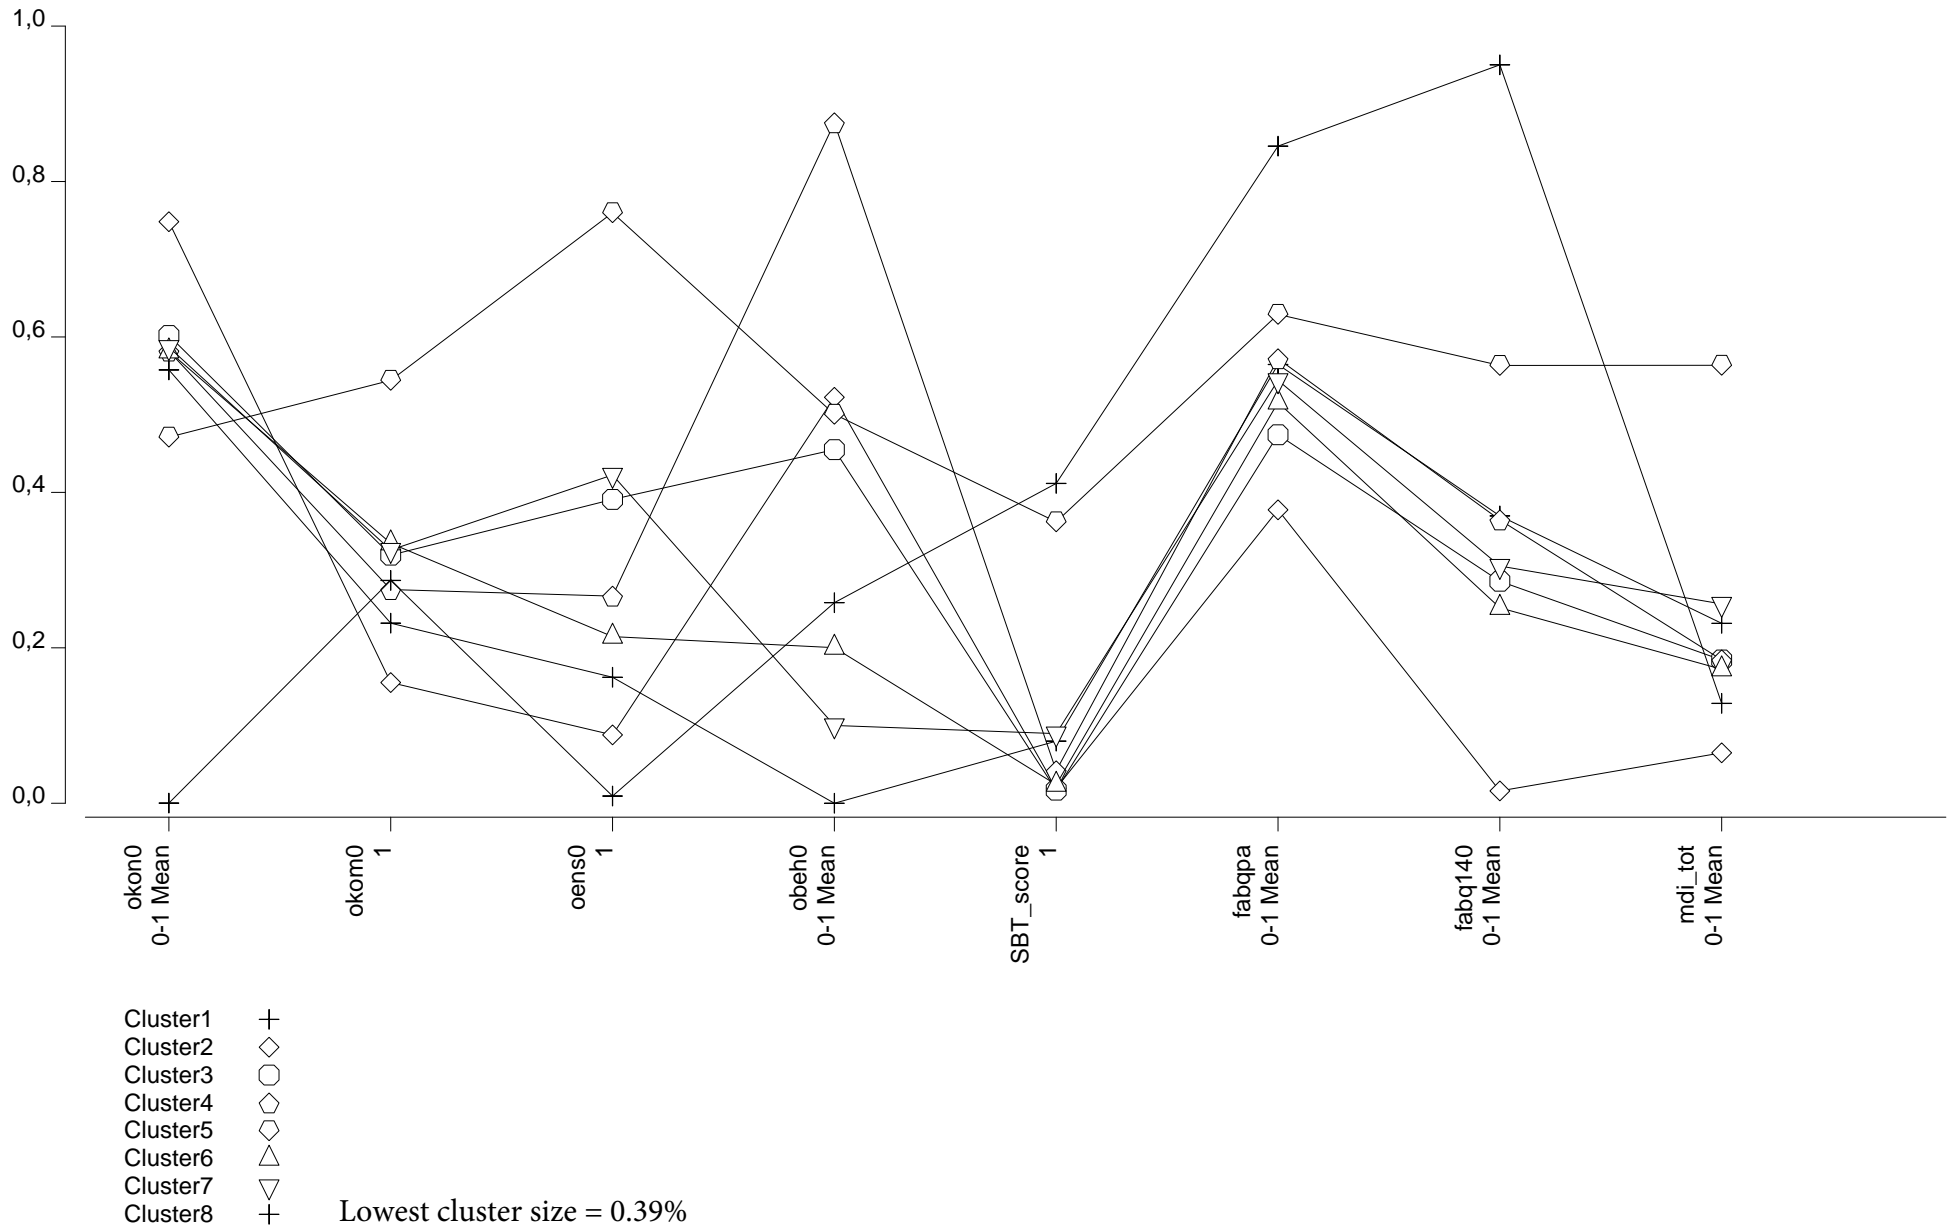



Psychology domain, summary-score, 9-domain profiles

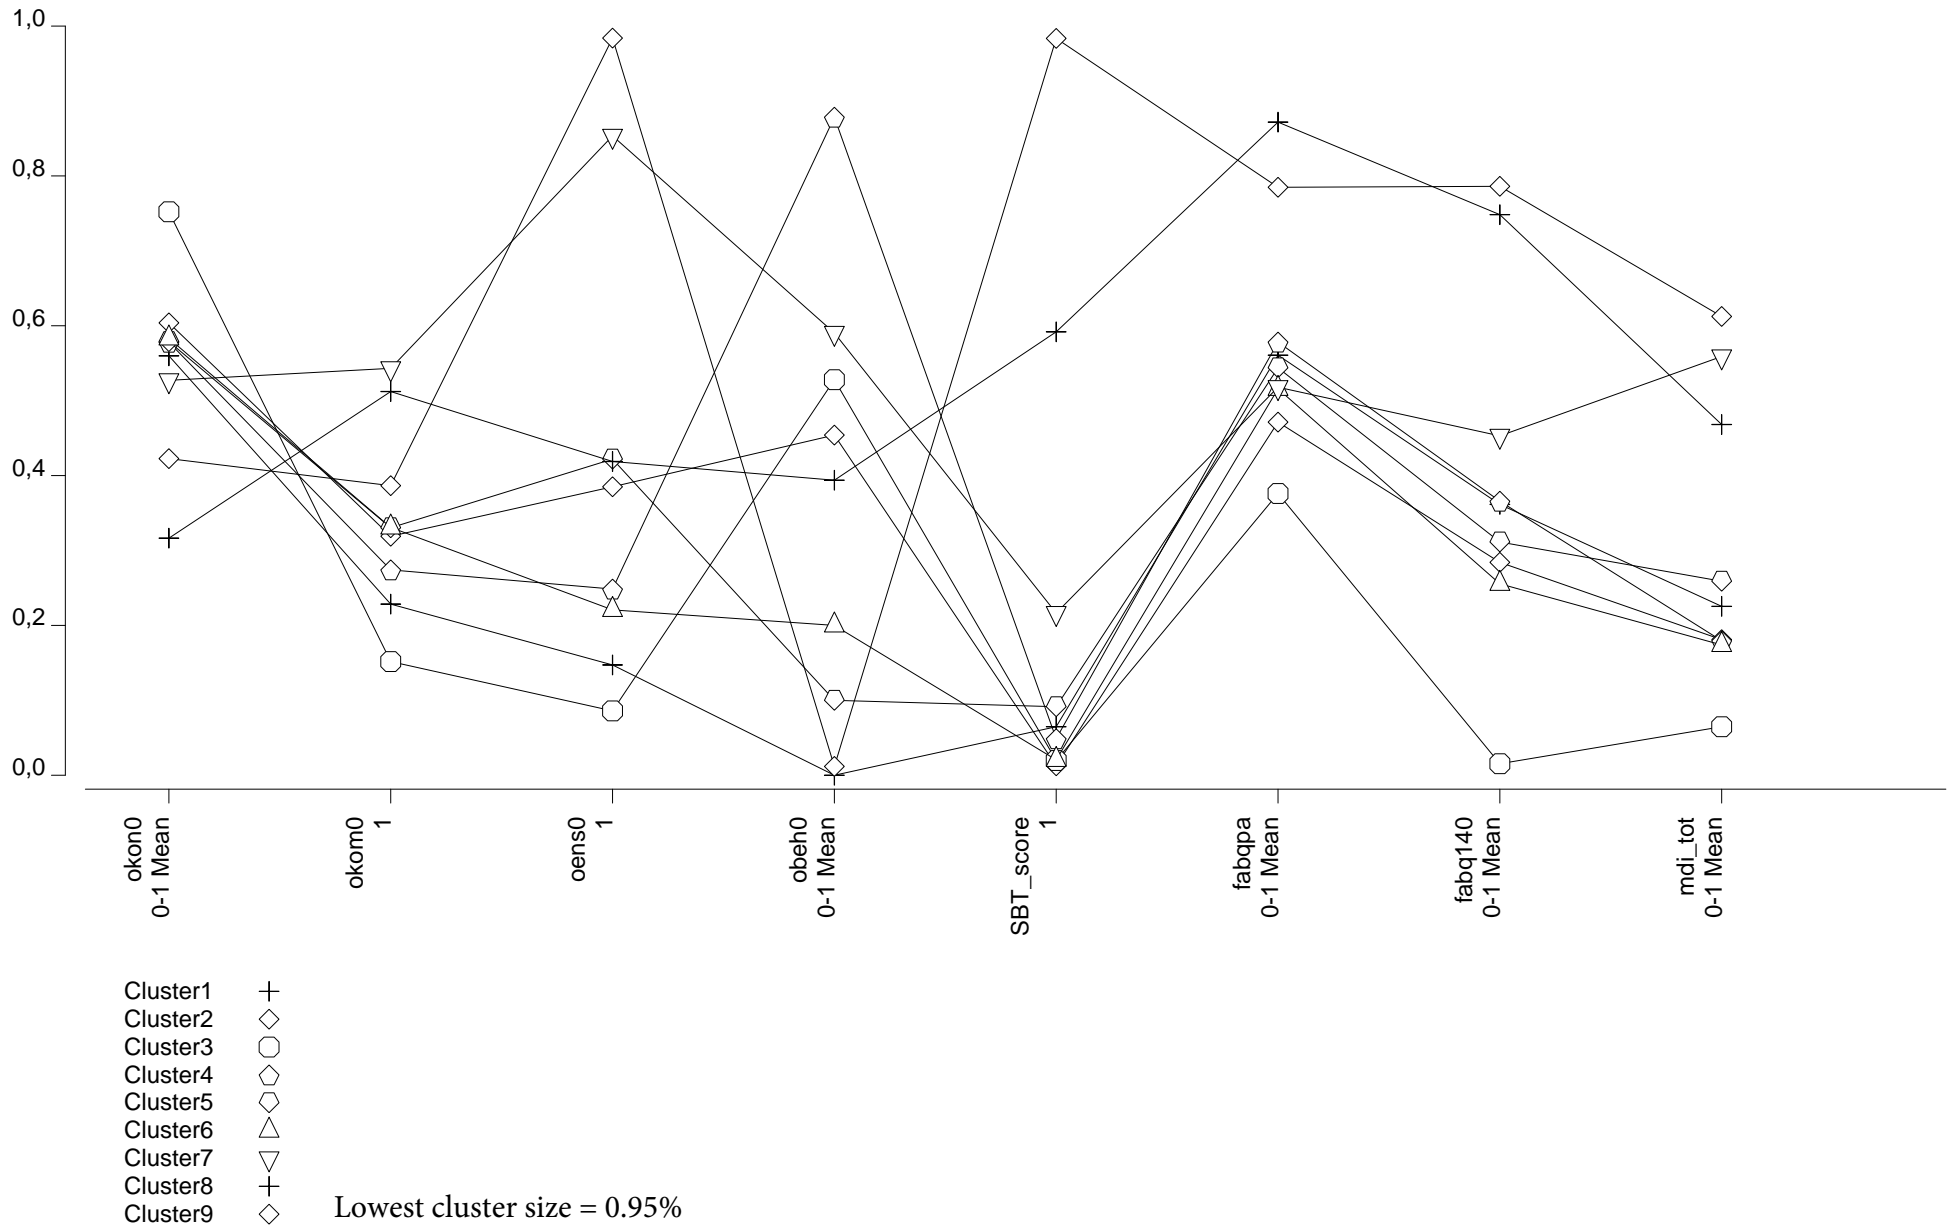

Psychology domain, summary-score, 10-domain profiles

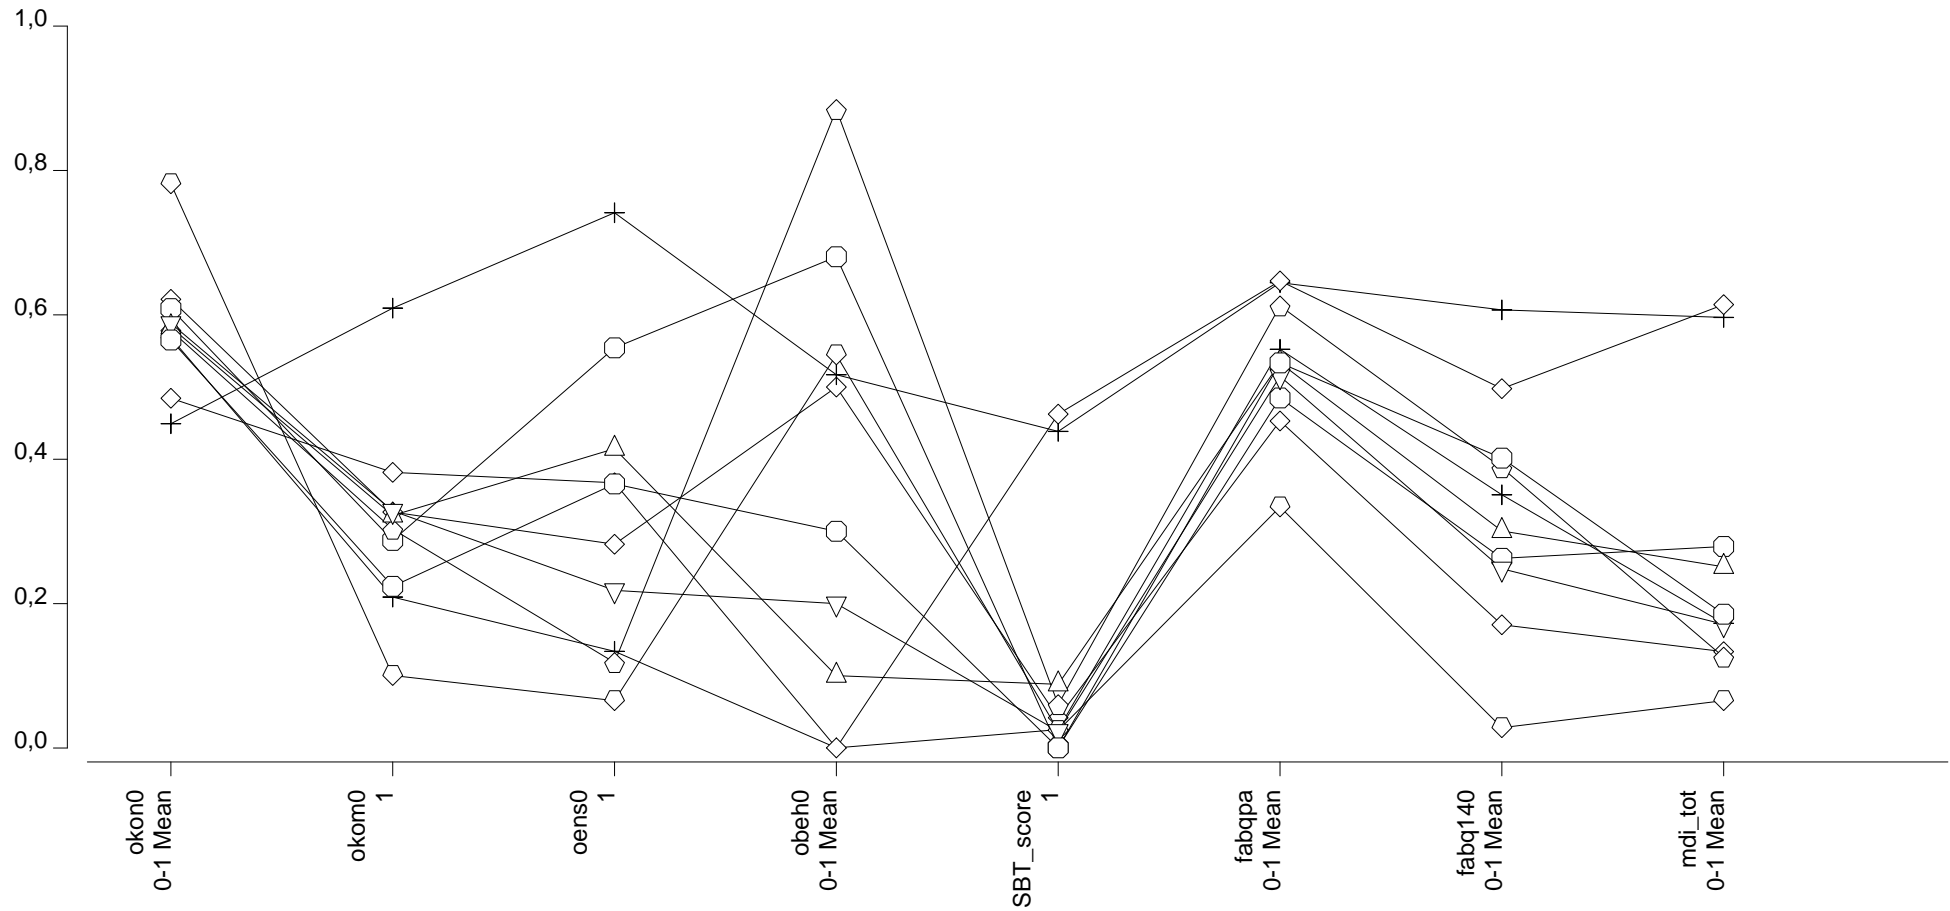

Cluster1 +  
 Cluster2 ◇  
 Cluster3 ○  
 Cluster4 ◇  
 Cluster5 ◇  
 Cluster6 △  
 Cluster7 ▽  
 Cluster8 +  
 Cluster9 ◇  
 Cluster10 ○

Lowest cluster size = 4.07%

**Profile in numbers – 5-DP, psychology domain, summary-score**

The first row of numbers shows how large each cluster is. The body of the table contains (marginal) conditional probabilities that show how the clusters are related to the Nominal or Ordinal indicator variables. These probabilities sum to 1 within each cluster (column). For indicators specified as Continuous, the body of the table contains means instead of probabilities. For indicators specified as Ordinal, means are displayed in addition to the conditional probabilities

| 5-DP              | Cluster1 | s.e.   | Cluster2 | s.e.   | Cluster3 | s.e.   | Cluster4 | s.e.   | Cluster5 | s.e.   |
|-------------------|----------|--------|----------|--------|----------|--------|----------|--------|----------|--------|
| Cluster Size      | 35,43%   | 0,0162 | 22,83%   | 0,0282 | 19,23%   | 0,0305 | 13,47%   | 0,0168 | 9,05%    | 0,0152 |
| <b>Indicators</b> |          |        |          |        |          |        |          |        |          |        |
| okon0             |          |        |          |        |          |        |          |        |          |        |
| Mean              | 5,5673   | 0,152  | 5,7328   | 0,2252 | 7,3833   | 0,1986 | 5,6014   | 0,2348 | 4,7069   | 0,2584 |
| okom0             |          |        |          |        |          |        |          |        |          |        |
| 0                 | 0,7705   | 0,0237 | 0,6846   | 0,0416 | 0,8337   | 0,036  | 0,667    | 0,05   | 0,4617   | 0,0672 |
| 1                 | 0,2295   | 0,0237 | 0,3154   | 0,0416 | 0,1663   | 0,036  | 0,333    | 0,05   | 0,5383   | 0,0672 |
| oens0             |          |        |          |        |          |        |          |        |          |        |
| 0                 | 0,8469   | 0,0209 | 0,6497   | 0,0474 | 0,8973   | 0,0336 | 0,6777   | 0,0527 | 0,2244   | 0,0575 |
| 1                 | 0,1531   | 0,0209 | 0,3503   | 0,0474 | 0,1027   | 0,0336 | 0,3223   | 0,0527 | 0,7756   | 0,0575 |
| obeh0             |          |        |          |        |          |        |          |        |          |        |
| Mean              | 0        | 0,0045 | 6,6162   | 0,2997 | 4,9248   | 0,29   | 1,6765   | 0,1067 | 4,1974   | 0,4202 |
| SBT_score         |          |        |          |        |          |        |          |        |          |        |
| 0                 | 0,9256   | 0,0155 | 0,9601   | 0,0182 | 0,9858   | 0,0107 | 0,9725   | 0,0186 | 0,5987   | 0,0708 |
| 1                 | 0,0744   | 0,0155 | 0,0399   | 0,0182 | 0,0142   | 0,0107 | 0,0275   | 0,0186 | 0,4013   | 0,0708 |
| fabqpa            |          |        |          |        |          |        |          |        |          |        |
| Mean              | 13,5405  | 0,3346 | 12,6519  | 0,4684 | 9,7343   | 0,5285 | 12,8932  | 0,4381 | 15,1631  | 0,6437 |
| fabq140           |          |        |          |        |          |        |          |        |          |        |
| 0                 | 0,3937   | 0,0273 | 0,4127   | 0,0397 | 0,8718   | 0,076  | 0,4387   | 0,0467 | 0,2216   | 0,0465 |
| 1                 | 0,1081   | 0,0131 | 0,1109   | 0,0146 | 0,0879   | 0,0304 | 0,1144   | 0,0146 | 0,0748   | 0,0138 |
| 2                 | 0,0787   | 0,0109 | 0,079    | 0,0109 | 0,0235   | 0,0199 | 0,0791   | 0,0109 | 0,0669   | 0,0107 |
| 3                 | 0,1047   | 0,0122 | 0,1028   | 0,0124 | 0,0115   | 0,0156 | 0,0998   | 0,0126 | 0,1093   | 0,0128 |
| 4                 | 0,0794   | 0,0109 | 0,0763   | 0,0118 | 0,0032   | 0,006  | 0,0719   | 0,012  | 0,1019   | 0,0141 |
| 5                 | 0,0861   | 0,0119 | 0,0809   | 0,0142 | 0,0013   | 0,003  | 0,0741   | 0,0145 | 0,1359   | 0,0212 |
| 6                 | 0,1494   | 0,0181 | 0,1374   | 0,0257 | 0,0008   | 0,0023 | 0,122    | 0,0269 | 0,2896   | 0,0485 |
| Mean              | 2,2238   | 0,1387 | 2,1113   | 0,2248 | 0,1934   | 0,1681 | 1,9618   | 0,2513 | 3,361    | 0,332  |
| mdi_tot           |          |        |          |        |          |        |          |        |          |        |
| Mean              | 8,3845   | 0,428  | 7,3076   | 0,619  | 2,6775   | 0,2785 | 7,8495   | 0,6049 | 21,1338  | 1,4628 |

| Loadings – 5DP | Clusters | R <sup>2</sup> |
|----------------|----------|----------------|
| okon0          | 0,3223   | 0,1039         |
| okom0          | 0,224    | 0,0502         |
| oens0          | 0,4237   | 0,1796         |
| obeh0          | 0,8274   | 0,6846         |
| SBT_score      | 0,3891   | 0,1514         |
| fabqpa         | 0,2911   | 0,0847         |
| fabq140        | 0,3988   | 0,159          |
| mdi_tot        | 0,6359   | 0,4043         |

**Profile in numbers – 6DP**

The first row of numbers shows how large each cluster is. The body of the table contains (marginal) conditional probabilities that show how the clusters are related to the Nominal or Ordinal indicator variables. These probabilities sum to 1 within each cluster (column). For indicators specified as Continuous, the body of the table contains means instead of probabilities. For indicators specified as Ordinal, means are displayed in addition to the conditional probabilities

| <b>Psych. domain, sum. score</b> | <b>Cluster1</b> | <b>s.e.</b> | <b>Cluster2</b> | <b>s.e.</b> | <b>Cluster3</b> | <b>s.e.</b> | <b>Cluster4</b> | <b>s.e.</b> | <b>Cluster5</b> | <b>s.e.</b> | <b>Cluster6</b> | <b>s.e.</b> |
|----------------------------------|-----------------|-------------|-----------------|-------------|-----------------|-------------|-----------------|-------------|-----------------|-------------|-----------------|-------------|
| <b>6-DP</b>                      |                 |             |                 |             |                 |             |                 |             |                 |             |                 |             |
| Cluster Size                     | 35,14%          | 0,0162      | 23,08%          | 0,0275      | 18,23%          | 0,0271      | 13,28%          | 0,0166      | 6,61%           | 0,0154      | 3,66%           | 0,0094      |
| <b>Indicators</b>                |                 |             |                 |             |                 |             |                 |             |                 |             |                 |             |
| okon0                            |                 |             |                 |             |                 |             |                 |             |                 |             |                 |             |
| Mean                             | 5,5867          | 0,1527      | 5,7821          | 0,2071      | 7,418           | 0,1974      | 5,632           | 0,2385      | 5,4102          | 0,3024      | 3,4356          | 0,3599      |
| okom0                            |                 |             |                 |             |                 |             |                 |             |                 |             |                 |             |
| 0                                | 0,7721          | 0,0237      | 0,6878          | 0,0403      | 0,8357          | 0,0372      | 0,6615          | 0,0506      | 0,4871          | 0,082       | 0,5102          | 0,1084      |
| 1                                | 0,2279          | 0,0237      | 0,3122          | 0,0403      | 0,1643          | 0,0372      | 0,3385          | 0,0506      | 0,5129          | 0,082       | 0,4898          | 0,1084      |
| oens0                            |                 |             |                 |             |                 |             |                 |             |                 |             |                 |             |
| 0                                | 0,852           | 0,0206      | 0,6633          | 0,0464      | 0,9006          | 0,0333      | 0,6888          | 0,055       | 0,1138          | 0,0585      | 0,4541          | 0,1079      |
| 1                                | 0,148           | 0,0206      | 0,3367          | 0,0464      | 0,0994          | 0,0333      | 0,3112          | 0,055       | 0,8862          | 0,0585      | 0,5459          | 0,1079      |
| obeh0                            |                 |             |                 |             |                 |             |                 |             |                 |             |                 |             |
| Mean                             | 0               | 0,0042      | 6,629           | 0,2966      | 4,9026          | 0,2942      | 1,6851          | 0,108       | 4,6802          | 0,4977      | 2,8781          | 0,5405      |
| SBT_score                        |                 |             |                 |             |                 |             |                 |             |                 |             |                 |             |
| 0                                | 0,933           | 0,015       | 0,9664          | 0,0151      | 0,985           | 0,0111      | 0,9737          | 0,0192      | 0,7698          | 0,068       | 0,3007          | 0,1233      |
| 1                                | 0,067           | 0,015       | 0,0336          | 0,0151      | 0,015           | 0,0111      | 0,0263          | 0,0192      | 0,2302          | 0,068       | 0,6993          | 0,1233      |
| fabqpa                           |                 |             |                 |             |                 |             |                 |             |                 |             |                 |             |
| Mean                             | 13,4797         | 0,3349      | 12,5752         | 0,4462      | 9,6559          | 0,5382      | 12,873          | 0,4455      | 12,5002         | 0,6236      | 19,8754         | 0,7568      |
| fabq140                          |                 |             |                 |             |                 |             |                 |             |                 |             |                 |             |
| 0                                | 0,3929          | 0,0271      | 0,4188          | 0,0382      | 0,8934          | 0,0692      | 0,4391          | 0,0476      | 0,3377          | 0,0638      | 0,0744          | 0,0424      |
| 1                                | 0,1103          | 0,0134      | 0,1142          | 0,0148      | 0,0787          | 0,0335      | 0,1169          | 0,015       | 0,1011          | 0,0164      | 0,0337          | 0,0154      |
| 2                                | 0,0801          | 0,0109      | 0,0804          | 0,0109      | 0,0179          | 0,0181      | 0,0804          | 0,0109      | 0,0782          | 0,0111      | 0,0395          | 0,0135      |
| 3                                | 0,1059          | 0,0123      | 0,1031          | 0,0125      | 0,0074          | 0,0119      | 0,1007          | 0,0128      | 0,1102          | 0,0131      | 0,0844          | 0,0187      |
| 4                                | 0,0799          | 0,011       | 0,0755          | 0,0117      | 0,0018          | 0,0038      | 0,072           | 0,0122      | 0,0886          | 0,0149      | 0,1027          | 0,0153      |
| 5                                | 0,0857          | 0,0119      | 0,0786          | 0,0135      | 0,0006          | 0,0016      | 0,0732          | 0,0147      | 0,1013          | 0,0216      | 0,178           | 0,0238      |
| 6                                | 0,1453          | 0,018       | 0,1294          | 0,0234      | 0,0003          | 0,001       | 0,1176          | 0,027       | 0,183           | 0,0475      | 0,4871          | 0,0853      |
| Mean                             | 2,2078          | 0,1383      | 2,0558          | 0,2099      | 0,1485          | 0,1337      | 1,9399          | 0,256       | 2,5468          | 0,3967      | 4,59            | 0,4292      |
| mdi_tot                          |                 |             |                 |             |                 |             |                 |             |                 |             |                 |             |
| Mean                             | 8,2124          | 0,41        | 7,0954          | 0,5166      | 2,5986          | 0,2643      | 7,6352          | 0,6286      | 21,356          | 1,8941      | 19,2617         | 2,071       |

| Loadings - 6DP | Clusters | R <sup>2</sup> |
|----------------|----------|----------------|
| okon0          | 0,3469   | 0,1203         |
| okom0          | 0,2149   | 0,0462         |
| oens0          | 0,4498   | 0,2024         |
| obeh0          | 0,829    | 0,6873         |
| SBT_score      | 0,4886   | 0,2388         |
| fabqpa         | 0,359    | 0,1289         |
| fabq140        | 0,421    | 0,1772         |
| mdi_tot        | 0,6469   | 0,4185         |

#### Loadings – psychology domain, summary-score – 6-DP

The quantities reported under Clusters are simply correlations, representing the square root of the corresponding 'R<sup>2</sup>' or communality of the associated indicator.

Correlations: These are standardised values for the loadings reported in the Loadings output. They represent correlations between the indicators and factors.

### Psychology domain, summary-score, 6-domain profiles

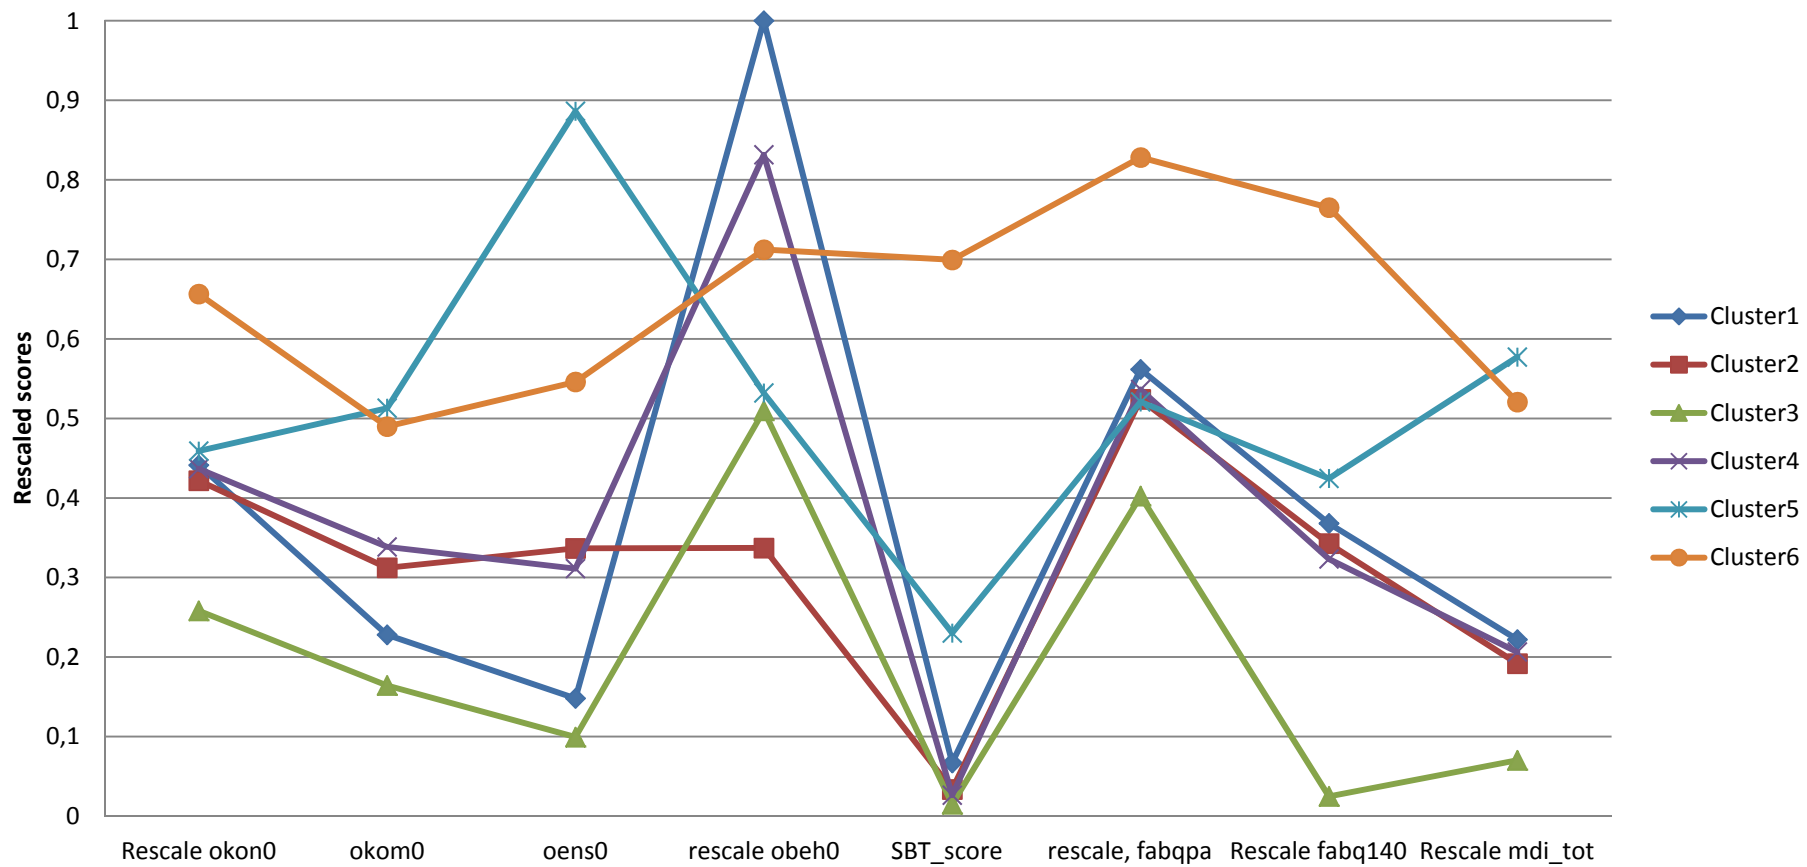

## Pain domain v. 2 – summary-score strategy

**Profile-plots:** Results with 2 to 7 domain profiles based on the following variables:

|                |                                                                                                                           |
|----------------|---------------------------------------------------------------------------------------------------------------------------|
| Dlva0          | For how long has this episode of LBP lasted? (0-2 weeks, 2-4 weeks, 1-3 months, >3 months)                                |
| Vasl0          | Numeric pain rating scale, 0-10 (10=worst imaginable pain)                                                                |
| Vasb0          | Numeric pain rating scale (0=no pain, 1 = mild pain, 2 = moderate-severe pain), ordinal variable                          |
| Tlep0          | How many episodes of LBP have you had before this one? (0, 1-3, >3)                                                       |
| Tlda0          | How many days have you had LBP within the last year? (30 days or less, >30 days)                                          |
| Fabq10         | My pain was caused by physical activity (0=disagree, 3 = don't know, 6=agree)                                             |
| Pain_dis       | Pain distribution (0=back pain only, 1=back pain and pain in one leg, 2=back pain and pain in two legs, 3=only leg pain)? |
| Domin_bp       | Dominating back pain? (0=no, 1=yes)                                                                                       |
| Paraspin_debut | Paraspinal pain onset? (0=no, 1=yes)                                                                                      |

**AMN's suggestion on final model: 6 domain profiles (clusters) both based on statistical criteria and profile plots**

**Cluster 1:** very short duration of BP, high intensity back pain, no leg pain

**Cluster 2:** very short duration of BP, high intensity back pain, high intensity leg pain, often only back pain, but sometimes pain in one leg,

**Cluster 3:** short duration of BP, low intensity back pain, very often only back pain

**Cluster 4:** long duration of BP (>1 month), moderate intensity back pain, low intensity leg pain, more than 30 days of LBP last year, very often only back pain

**Cluster 5:** long duration of back pain (>1 month), high intensity back pain, very high intensity leg pain, more than 30 days of LBP last year, often back pain and pain in one leg, often dominating back pain

**Cluster 6:** short duration of BP, moderate intensity back pain, very high intensity leg pain, often back pain and pain in one leg, but sometimes only leg pain, very often leg pain is dominating (very seldom back pain is dominating)

Pain domain version 2: the variable 'leg pain intensity' was used as continuous in version 1 (results not shown) and ordinal in version 2



## Description of model: Pain domain v.2, summary-score strategy, 6-domain profiles

Variables not mentioned in the description: tlep0, fabq10, paraspin\_debut (cf. reduced profile plot of final model)

**Cluster 1:** 0-2 weeks of back pain (**very short duration of BP**), **high intensity back pain**, very low intensity leg pain, less than 30 days of LBP last year, very often dominating back pain, **no leg pain**

**Cluster 2:** 0-2 weeks of back pain (very short duration of BP), high intensity back pain, high intensity leg pain, less than 30 days of LBP last year, often only back pain, but sometimes pain in one leg, very often dominating back pain

**Cluster 3:** 0-4 weeks of back pain (short duration of BP), low intensity back pain, very low intensity leg pain, less than 30 days of LBP last year, very often only back pain and dominating back pain

**Cluster 4:** long duration of BP (>1 month), moderate intensity back pain, low intensity leg pain, more than 30 days of LBP last year, very often only back pain, very often dominating back pain

**Cluster 5:** long duration of back pain (>1 month), high intensity back pain, very high intensity leg pain, more than 30 days of LBP last year, often back pain and pain in one leg, often dominating back pain

**Cluster 6:** 0-4 weeks of back pain (short duration of BP), moderate intensity back pain, very high intensity leg pain, less than 30 days of LBP last year, often back pain and pain in one leg, but sometimes only leg pain, very often leg pain is dominating (very seldom back pain is dominating)

Pain domain v. 2, summary-score strategy, 2-domain profiles

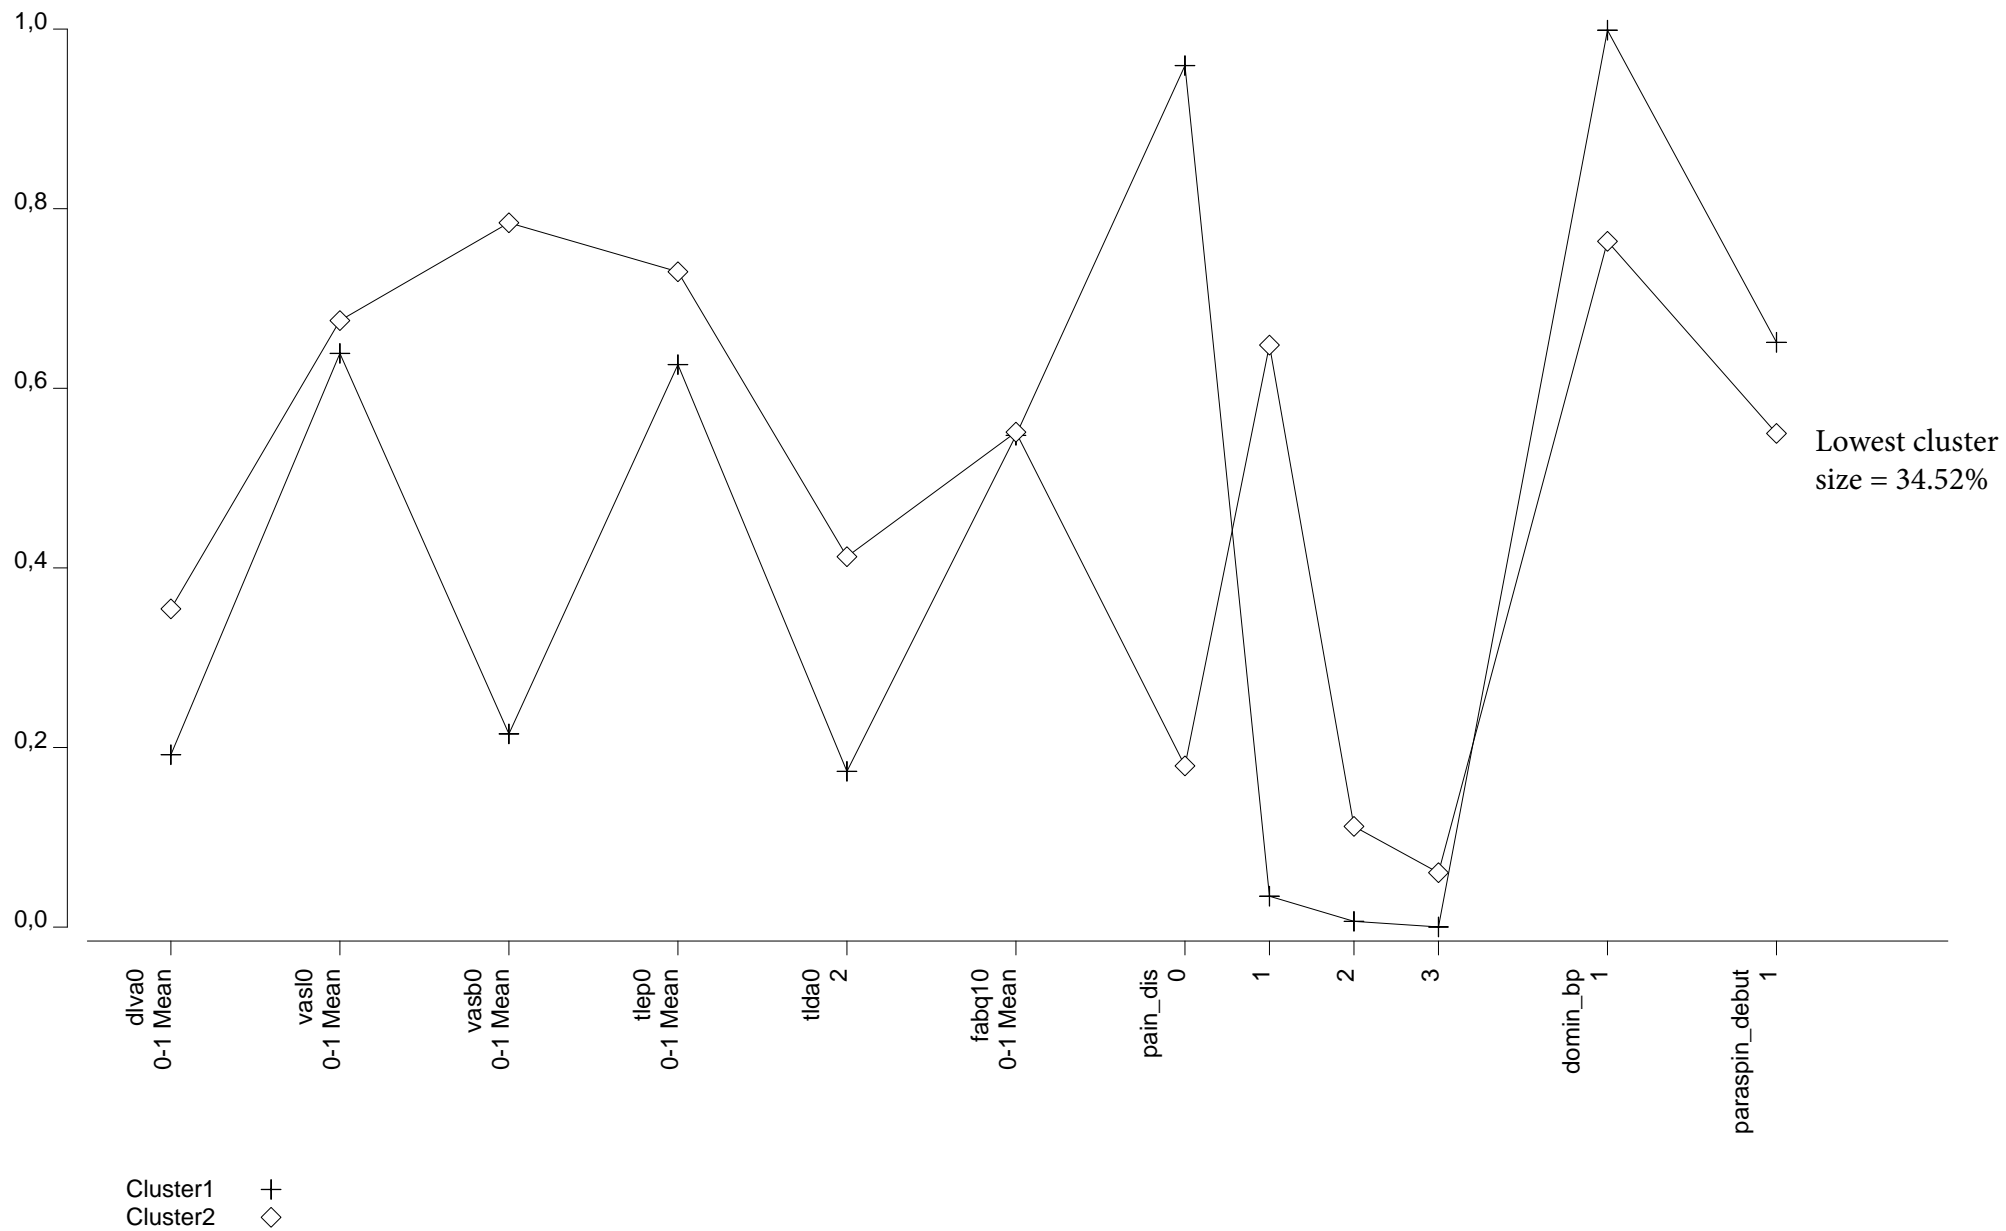

Pain domain v. 2, summary-score strategy, 3-domain profiles

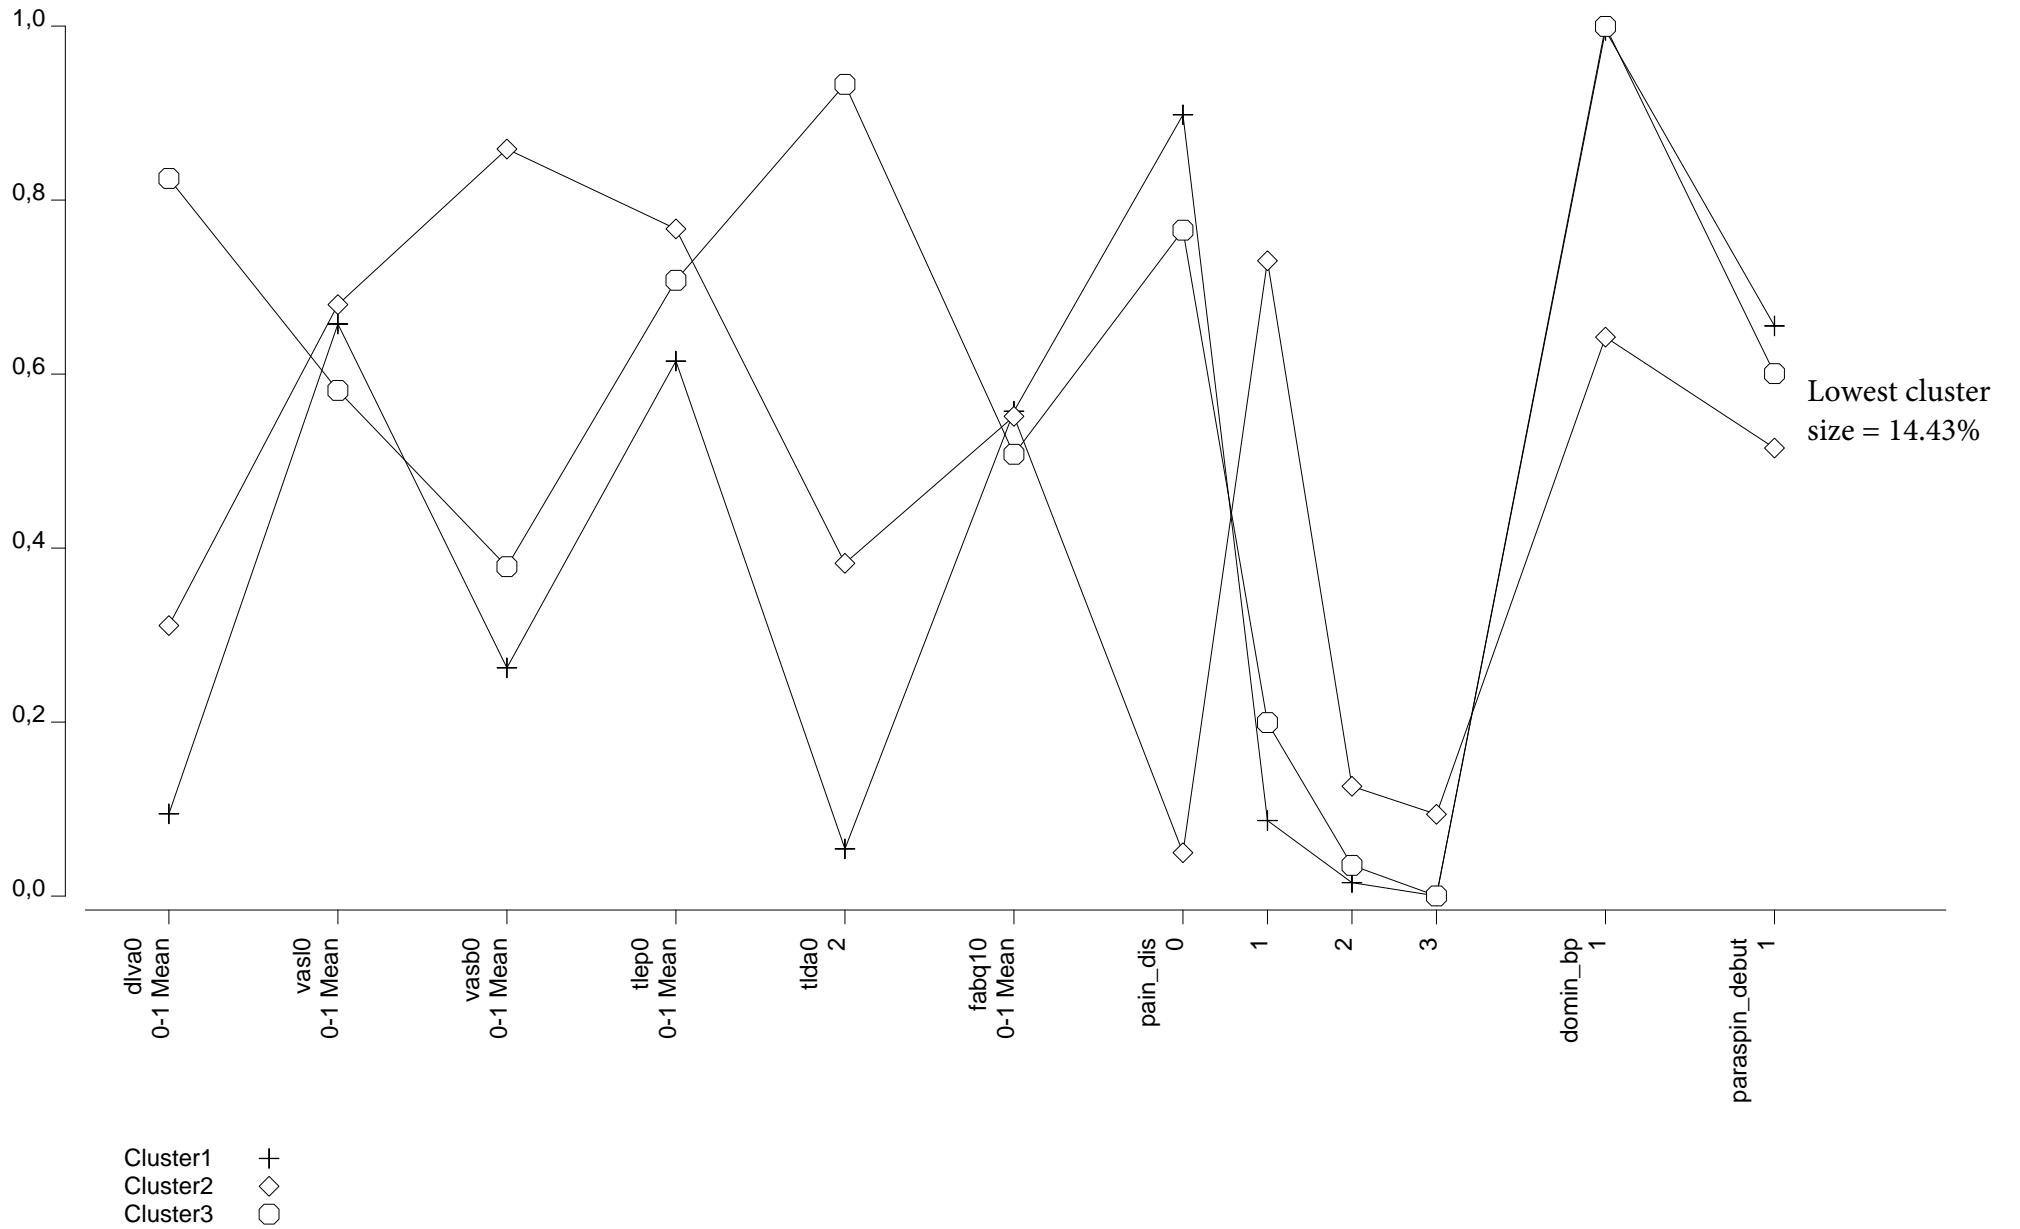

Pain domain v. 2, summary-score strategy, 4-domain profiles

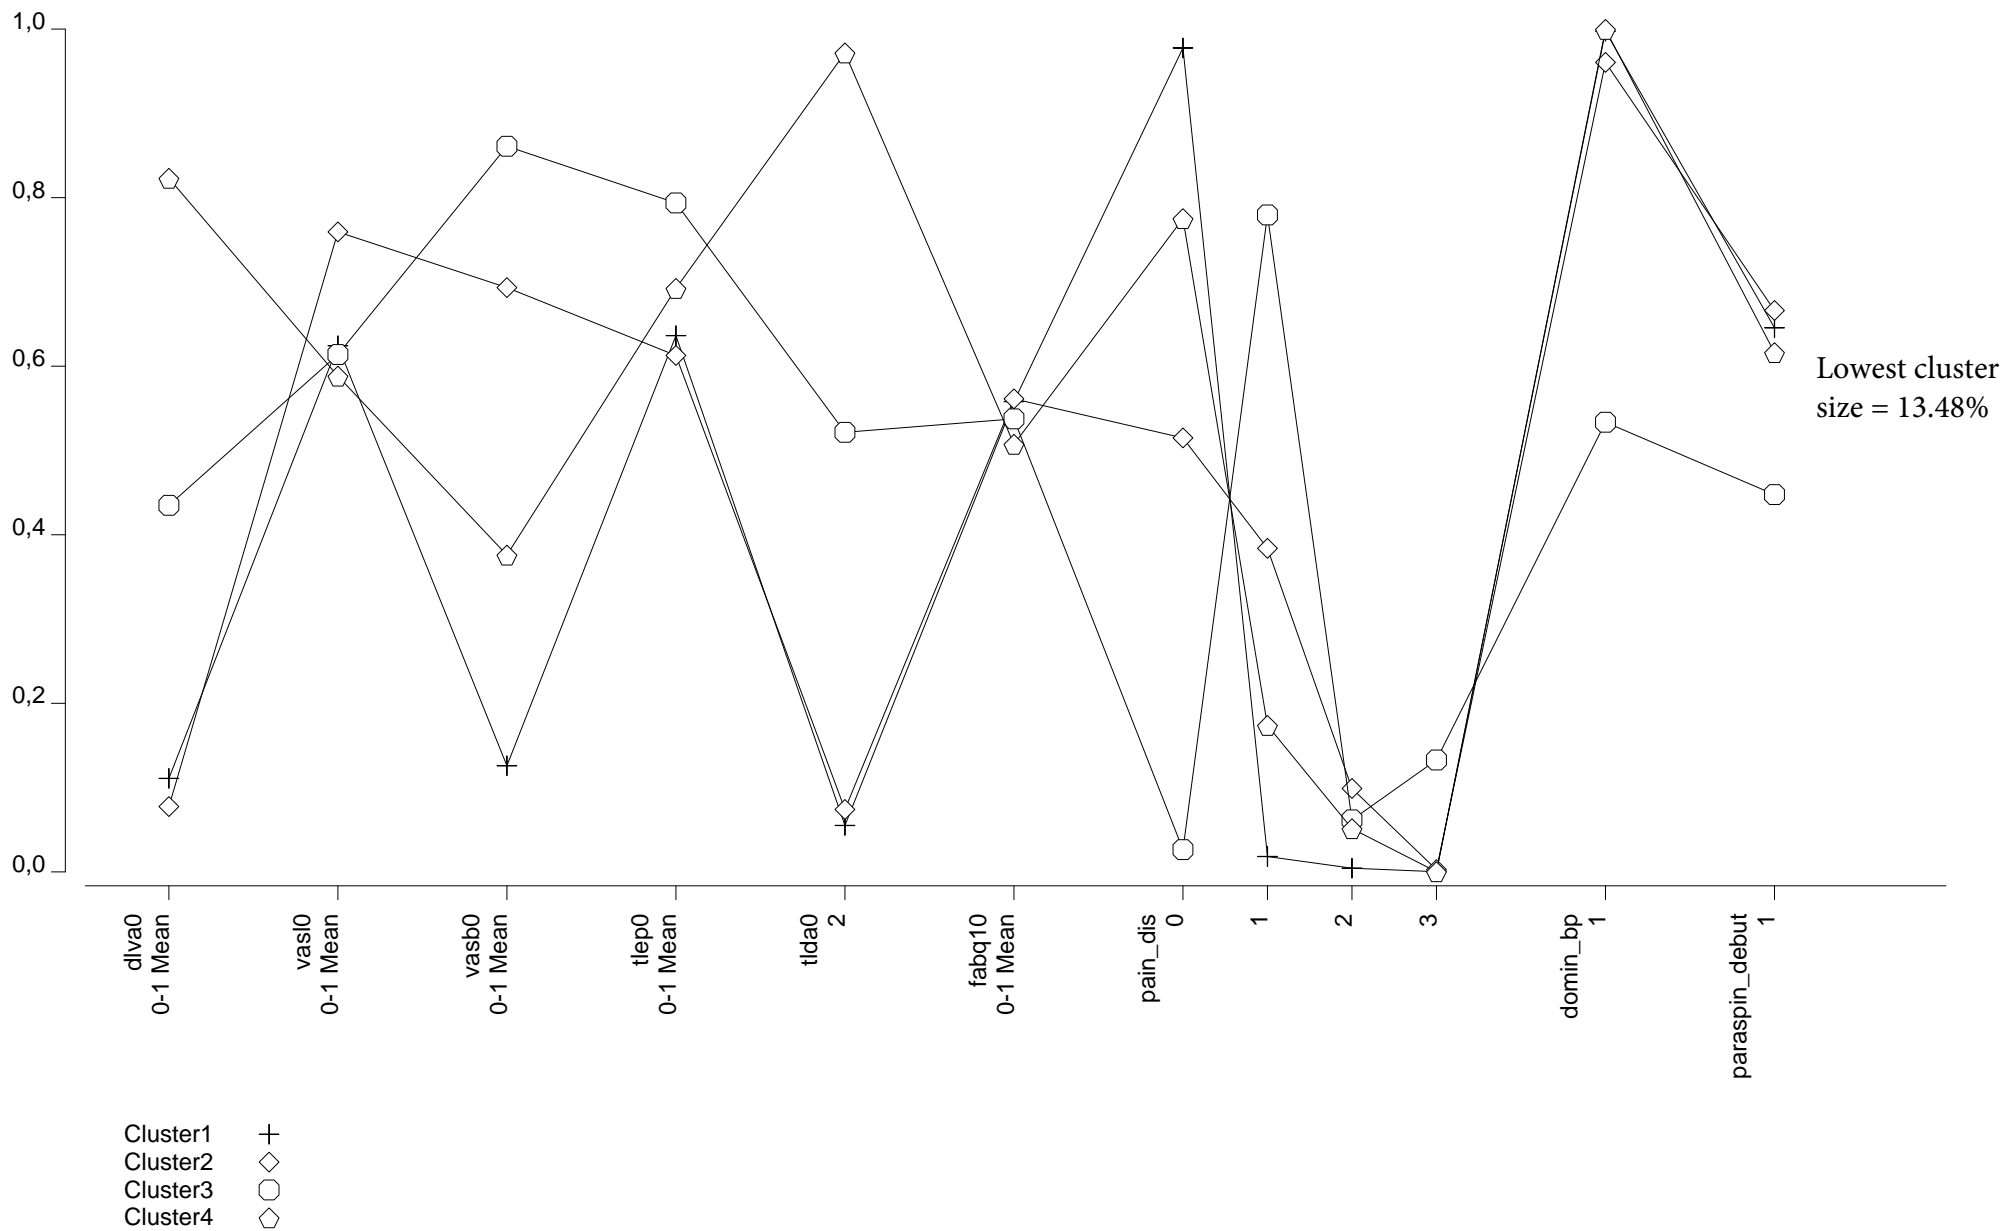

Pain domain v. 2, summary-score strategy, 5-domain profiles

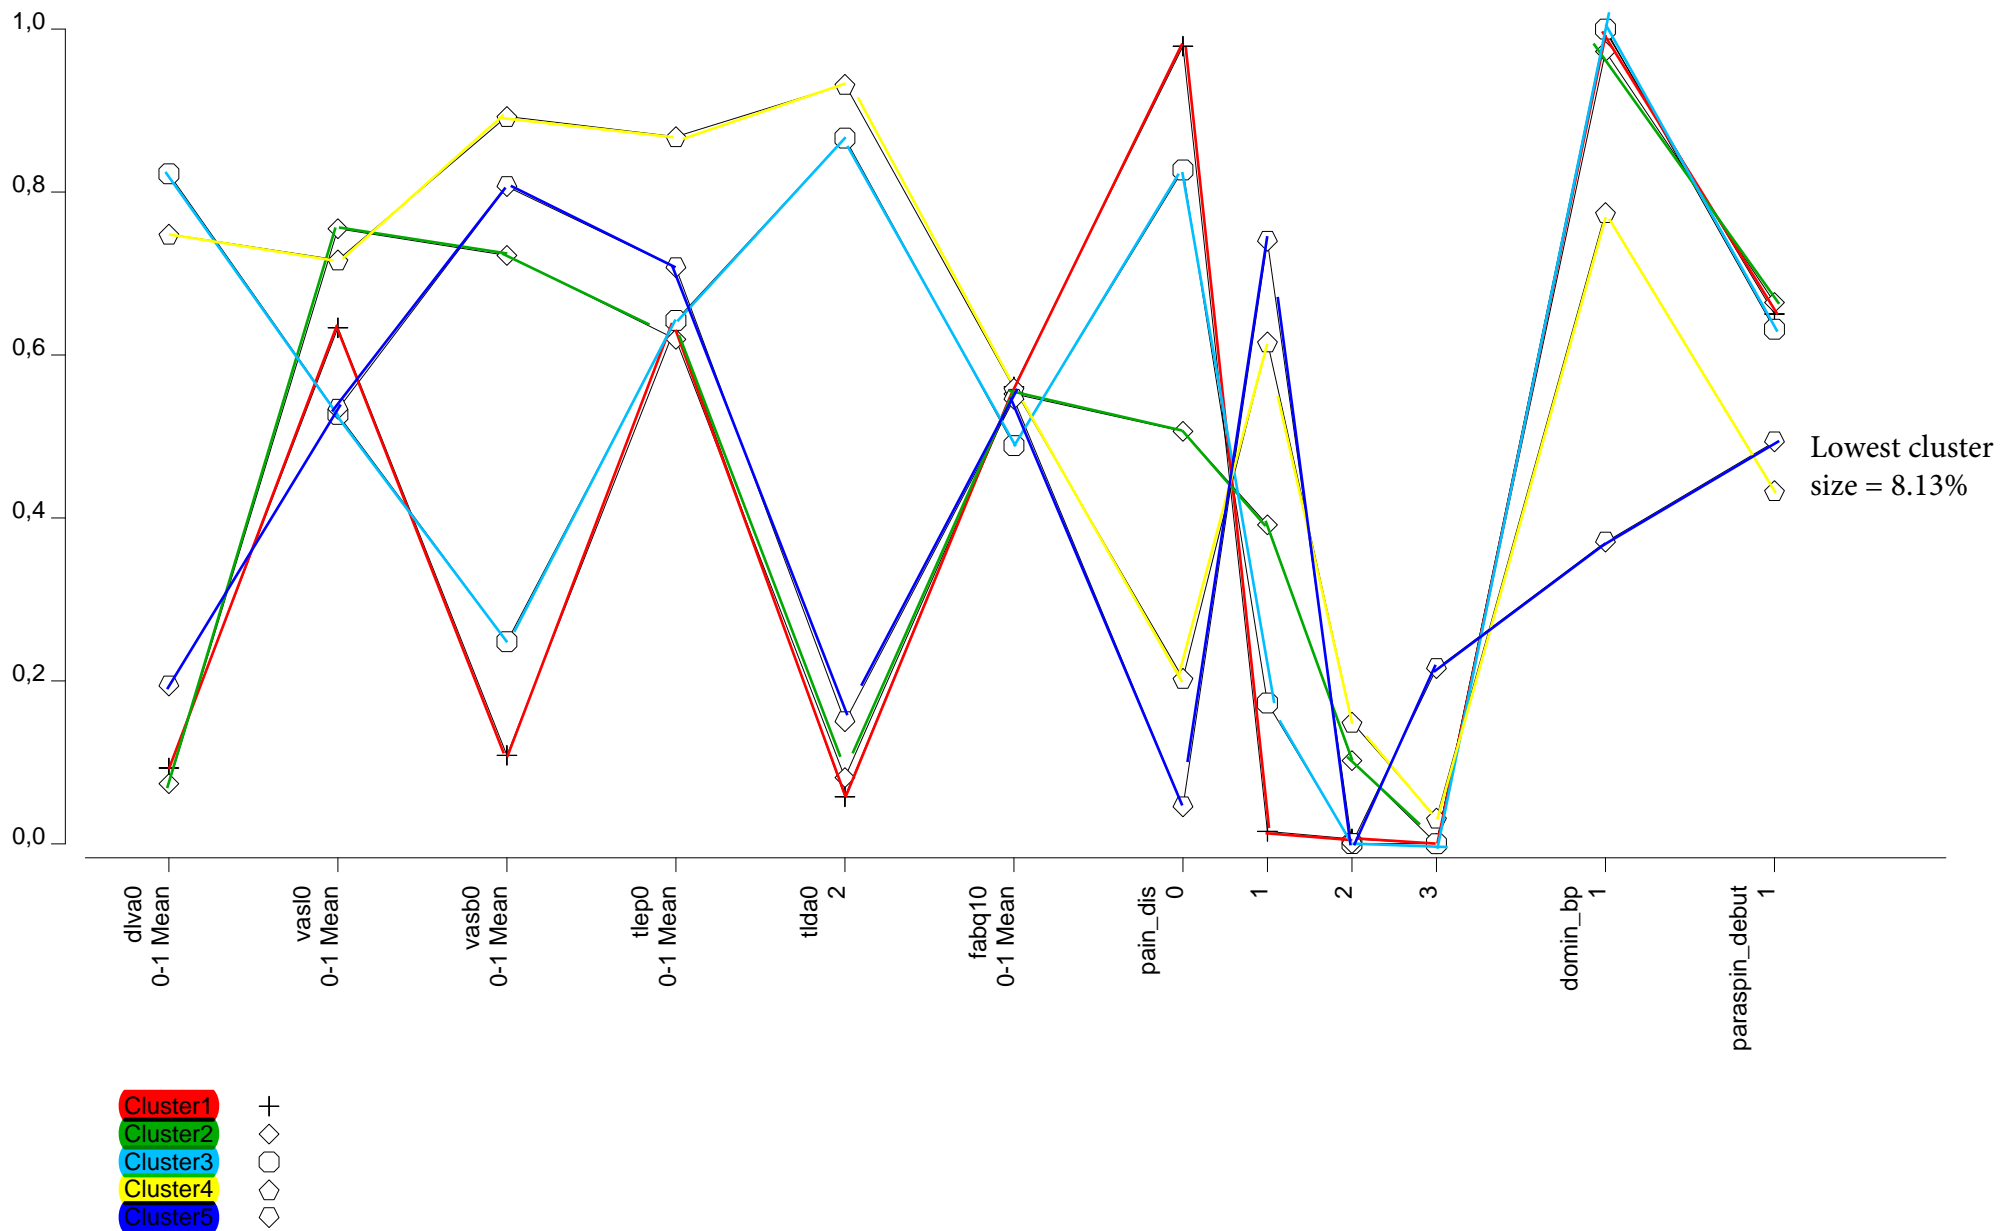

Pain domain v. 2, summary-score strategy, 6-domain profiles

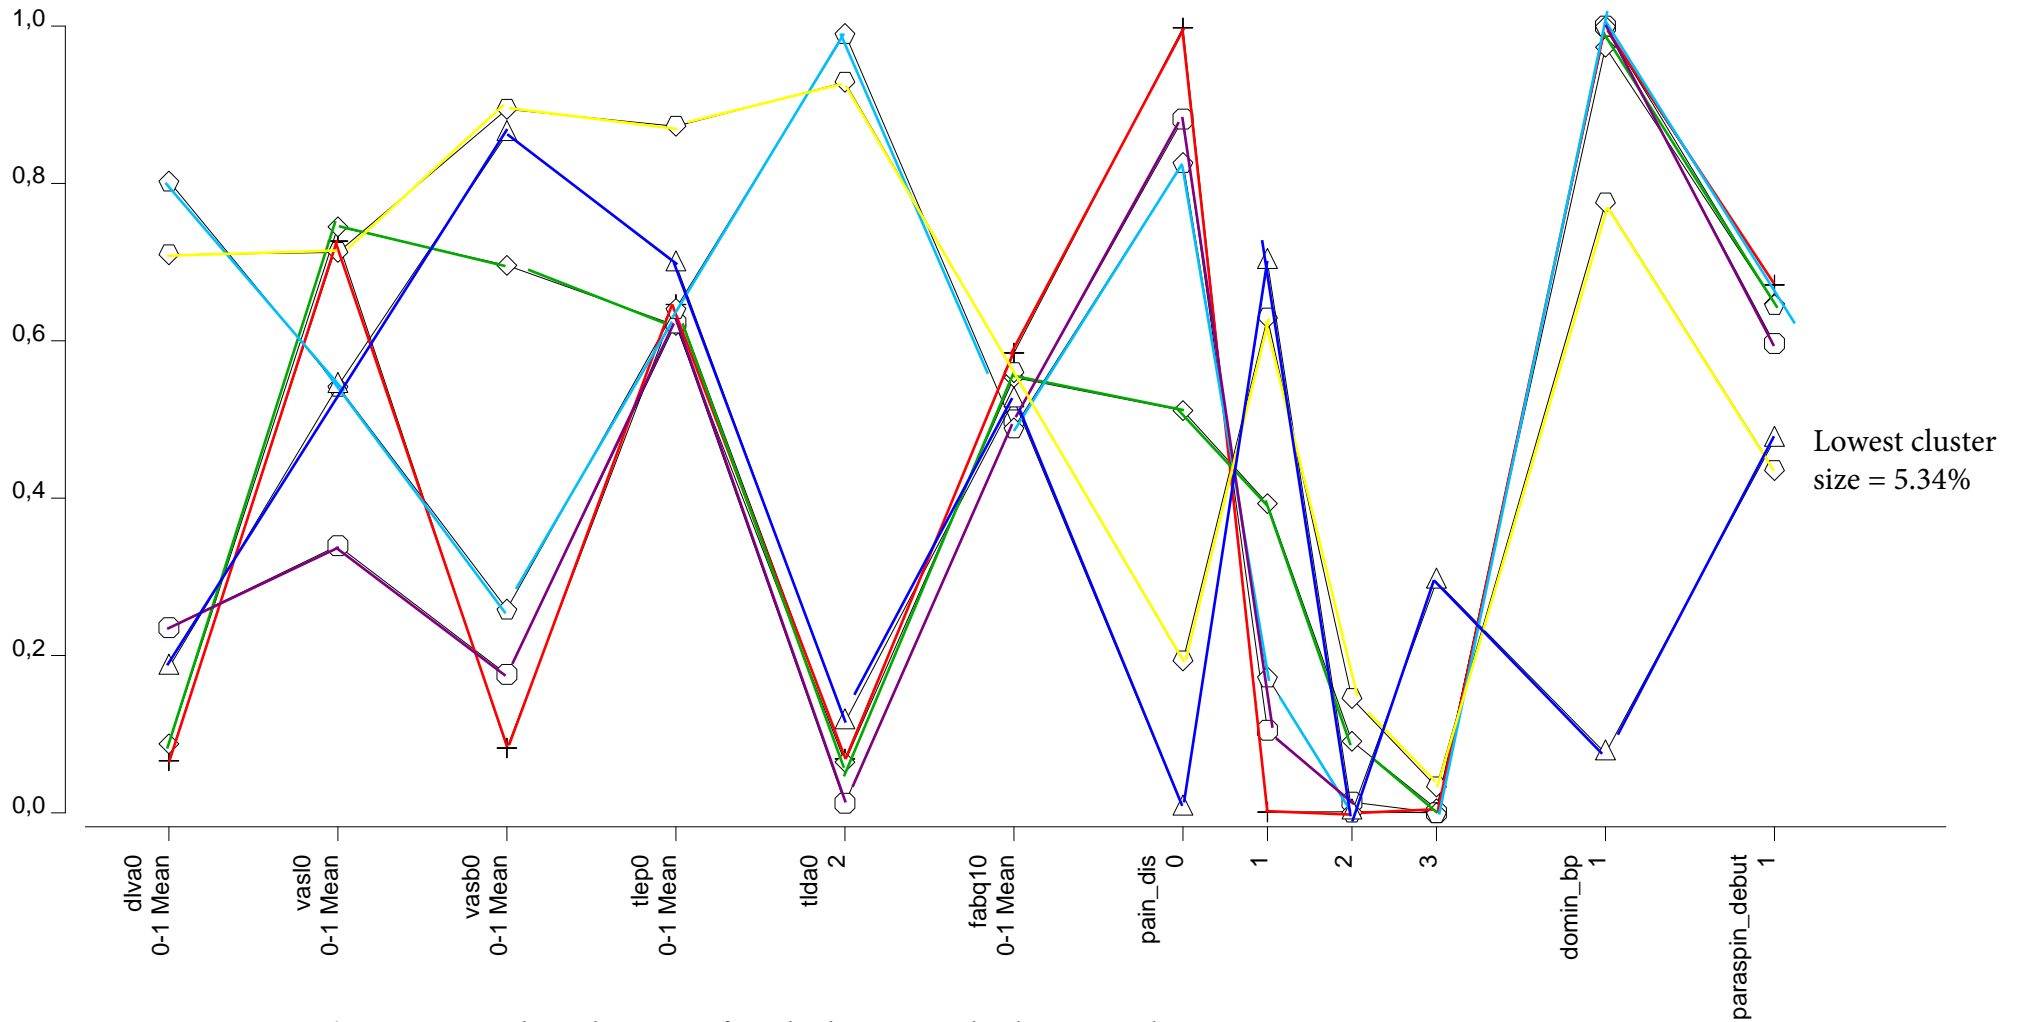

- Cluster1 + **Cluster 1:** very short duration of BP, high intensity back pain, no leg pain
- Cluster2 ○ **Cluster 2:** very short duration of BP, high intensity back pain, high intensity leg pain, often only back pain, but sometimes pain in one leg,
- Cluster3 ◇ **Cluster 3:** short duration of BP, low intensity back pain, very often only back pain
- Cluster4 ◇ **Cluster 4:** long duration of BP (>1 month), moderate intensity back pain, low intensity leg pain, more than 30 days of LBP last year, very often only back pain
- Cluster5 ◇ **Cluster 5:** long duration of back pain (>1 month), high intensity back pain, very high intensity leg pain, more than 30 days of LBP last year, often back pain and pain in one leg, often dominating back pain
- Cluster6 △ **Cluster 6:** short duration of BP, moderate intensity back pain, very high intensity leg pain, often back pain and pain in one leg, but sometimes only leg pain, very often leg pain is dominating (very seldom back pain is dominating)

Pain domain v. 2, summary-score strategy, 7-domain profiles

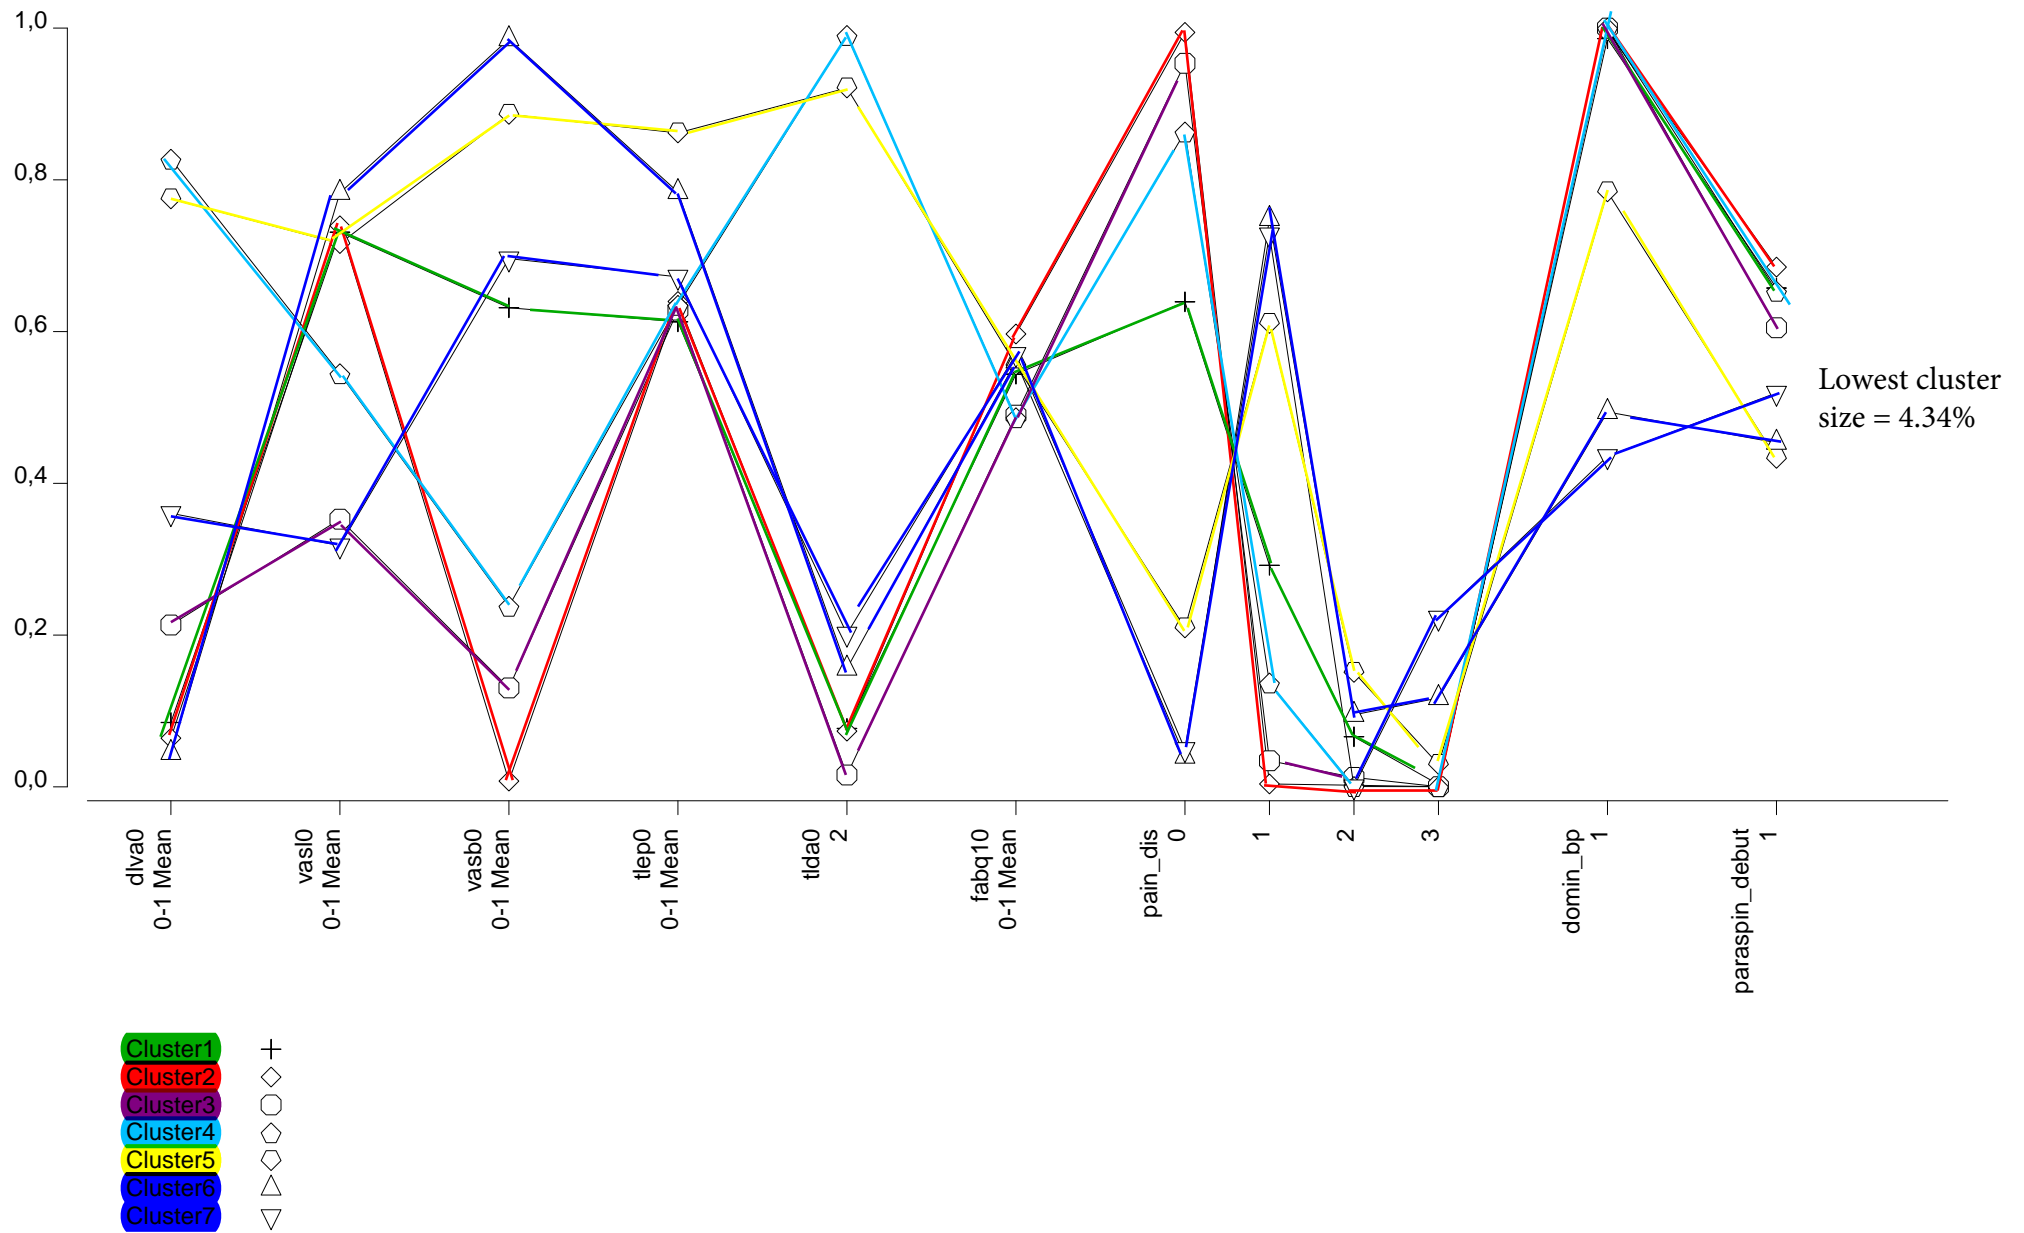

**Profiles in numbers – pain domain v.2, 5-DP, sum.score**

The first row of numbers shows how large each cluster is. The body of the table contains (marginal) conditional probabilities that show how the clusters are related to the Nominal or Ordinal indicator variables. These probabilities sum to 1 within each cluster (column). For indicators specified as Continuous, the body of the table contains means instead of probabilities. For indicators specified as Ordinal, means are displayed in addition to the conditional probabilities

| Pain v.2, sum.score<br>5-DP | Cluster1 | s.e.   | Cluster2 | s.e.   | Cluster3 | s.e.   | Cluster4 | s.e.   | Cluster5 | s.e.   |
|-----------------------------|----------|--------|----------|--------|----------|--------|----------|--------|----------|--------|
| Cluster Size                | 45,48%   | 0,0244 | 24,58%   | 0,0249 | 11,74%   | 0,015  | 10,06%   | 0,014  | 8,13%    | 0,0166 |
| Indicators                  |          |        |          |        |          |        |          |        |          |        |
| dlva0                       |          |        |          |        |          |        |          |        |          |        |
| 1                           | 0,7921   | 0,0237 | 0,828    | 0,0329 | 0,037    | 0,0256 | 0,0753   | 0,0499 | 0,6296   | 0,0674 |
| 2                           | 0,1473   | 0,0156 | 0,1289   | 0,0191 | 0,0743   | 0,0255 | 0,112    | 0,0321 | 0,2045   | 0,0262 |
| 3                           | 0,0502   | 0,011  | 0,0368   | 0,0131 | 0,2738   | 0,0355 | 0,3053   | 0,0374 | 0,1217   | 0,0328 |
| 4                           | 0,0104   | 0,0055 | 0,0064   | 0,0046 | 0,6149   | 0,0648 | 0,5074   | 0,0767 | 0,0442   | 0,0251 |
| Mean                        | 1,279    | 0,041  | 1,2216   | 0,0529 | 3,4666   | 0,1333 | 3,2448   | 0,1997 | 1,5806   | 0,1417 |
| vasl0                       |          |        |          |        |          |        |          |        |          |        |
| Mean                        | 6,3321   | 0,1174 | 7,5483   | 0,1304 | 5,2709   | 0,2347 | 7,1666   | 0,1571 | 5,3328   | 0,3984 |
| vasb0                       |          |        |          |        |          |        |          |        |          |        |
| 0                           | 0,7845   | 0,0341 | 0,0167   | 0,0211 | 0,5161   | 0,0591 | 0,0016   | 0,0023 | 0,0064   | 0,0082 |
| 1                           | 0,2138   | 0,0331 | 0,5222   | 0,0465 | 0,4717   | 0,0551 | 0,2117   | 0,0562 | 0,3739   | 0,0782 |
| 2                           | 0,0016   | 0,0023 | 0,4611   | 0,0497 | 0,0122   | 0,0157 | 0,7867   | 0,0572 | 0,6197   | 0,0805 |
| Mean                        | 0,2171   | 0,0352 | 1,4443   | 0,0606 | 0,4961   | 0,0666 | 1,7851   | 0,0583 | 1,6133   | 0,0835 |
| tlep0                       |          |        |          |        |          |        |          |        |          |        |
| 1                           | 0,1802   | 0,0182 | 0,1945   | 0,027  | 0,1753   | 0,0344 | 0,0318   | 0,0143 | 0,1258   | 0,038  |
| 2                           | 0,3669   | 0,0175 | 0,3726   | 0,0193 | 0,3647   | 0,0223 | 0,2006   | 0,0371 | 0,3346   | 0,0323 |
| 3                           | 0,4529   | 0,0247 | 0,4328   | 0,0368 | 0,4601   | 0,0499 | 0,7677   | 0,0507 | 0,5396   | 0,0671 |
| Mean                        | 2,2727   | 0,0397 | 2,2383   | 0,0616 | 2,2848   | 0,0827 | 2,7359   | 0,0646 | 2,4138   | 0,1041 |
| tlda0                       |          |        |          |        |          |        |          |        |          |        |
| 1                           | 0,9423   | 0,0149 | 0,9187   | 0,031  | 0,1339   | 0,0634 | 0,0679   | 0,044  | 0,8503   | 0,0744 |
| 2                           | 0,0577   | 0,0149 | 0,0813   | 0,031  | 0,8661   | 0,0634 | 0,9321   | 0,044  | 0,1497   | 0,0744 |
| fabq10                      |          |        |          |        |          |        |          |        |          |        |
| 0                           | 0,1542   | 0,016  | 0,1606   | 0,0222 | 0,2124   | 0,0341 | 0,1554   | 0,0309 | 0,1658   | 0,0376 |
| 1                           | 0,0718   | 0,0091 | 0,0739   | 0,0105 | 0,0893   | 0,0134 | 0,0722   | 0,0125 | 0,0755   | 0,0143 |
| 2                           | 0,0452   | 0,0069 | 0,0459   | 0,0072 | 0,0508   | 0,008  | 0,0453   | 0,0076 | 0,0465   | 0,008  |



|                |        |        |        |        |        |        |        |        |        |        |
|----------------|--------|--------|--------|--------|--------|--------|--------|--------|--------|--------|
| 3              | 0,2749 | 0,0149 | 0,276  | 0,0151 | 0,2791 | 0,015  | 0,2751 | 0,0157 | 0,2768 | 0,0157 |
| 4              | 0,1091 | 0,0105 | 0,1082 | 0,0106 | 0,1001 | 0,0109 | 0,109  | 0,0111 | 0,1075 | 0,0115 |
| 5              | 0,1278 | 0,012  | 0,1253 | 0,0133 | 0,1059 | 0,0145 | 0,1273 | 0,016  | 0,1232 | 0,0177 |
| 6              | 0,217  | 0,018  | 0,2101 | 0,0239 | 0,1624 | 0,0278 | 0,2157 | 0,0339 | 0,2047 | 0,0389 |
| Mean           | 3,3646 | 0,1089 | 3,3133 | 0,1615 | 2,9325 | 0,2264 | 3,3547 | 0,2369 | 3,2732 | 0,284  |
| pain_dis       |        |        |        |        |        |        |        |        |        |        |
| 0              | 0,9788 | 0,0111 | 0,5061 | 0,0476 | 0,8269 | 0,0465 | 0,2031 | 0,0528 | 0,0452 | 0,0455 |
| 1              | 0,0152 | 0,0098 | 0,3915 | 0,0454 | 0,1727 | 0,0464 | 0,6161 | 0,0594 | 0,7394 | 0,0658 |
| 2              | 0,0059 | 0,0046 | 0,1021 | 0,0224 | 0,0003 | 0,003  | 0,1493 | 0,0408 | 0,0004 | 0,0041 |
| 3              | 0      | 0,0002 | 0,0003 | 0,0037 | 0      | 0,0006 | 0,0316 | 0,0231 | 0,215  | 0,0599 |
| domin_bp       |        |        |        |        |        |        |        |        |        |        |
| 0              | 0,0029 | 0,003  | 0,0276 | 0,0182 | 0,0002 | 0,0014 | 0,2253 | 0,0505 | 0,6299 | 0,1089 |
| 1              | 0,9971 | 0,003  | 0,9724 | 0,0182 | 0,9998 | 0,0014 | 0,7747 | 0,0505 | 0,3701 | 0,1089 |
| paraspin_debut |        |        |        |        |        |        |        |        |        |        |
| 0              | 0,3498 | 0,0272 | 0,3357 | 0,0427 | 0,3684 | 0,0575 | 0,5666 | 0,0615 | 0,5067 | 0,0803 |
| 1              | 0,6502 | 0,0272 | 0,6643 | 0,0427 | 0,6316 | 0,0575 | 0,4334 | 0,0615 | 0,4933 | 0,0803 |

| Loadings, pain domain v.2, sum. score, 5-DP | Clusters | R <sup>2</sup> | <b>Loadings</b><br>The quantities reported under Clusters are simply correlations, representing the square root of the corresponding 'R2' or communality of the associated indicator.<br>Correlations: These are standardised values for the loadings reported in the Loadings output. They represent correlations between the indicators and factors. |
|---------------------------------------------|----------|----------------|--------------------------------------------------------------------------------------------------------------------------------------------------------------------------------------------------------------------------------------------------------------------------------------------------------------------------------------------------------|
| dlva0                                       | 0,7871   | 0,6196         |                                                                                                                                                                                                                                                                                                                                                        |
| vasl0                                       | 0,3803   | 0,1446         |                                                                                                                                                                                                                                                                                                                                                        |
| vasb0                                       | 0,8111   | 0,6578         |                                                                                                                                                                                                                                                                                                                                                        |
| tlep0                                       | 0,1956   | 0,0383         |                                                                                                                                                                                                                                                                                                                                                        |
| tlda0                                       | 0,7825   | 0,6123         |                                                                                                                                                                                                                                                                                                                                                        |
| fabq10                                      | 0,0656   | 0,0043         |                                                                                                                                                                                                                                                                                                                                                        |
| pain_dis                                    | 0,6187   | 0,3828         |                                                                                                                                                                                                                                                                                                                                                        |
| domin_bp                                    | 0,6399   | 0,4095         |                                                                                                                                                                                                                                                                                                                                                        |
| paraspin_debut                              | 0,1554   | 0,0242         |                                                                                                                                                                                                                                                                                                                                                        |

**Profiles in numbers – pain domain v.2, 6-DP, sum.score**

The first row of numbers shows how large each cluster is. The body of the table contains (marginal) conditional probabilities that show how the clusters are related to the Nominal or Ordinal indicator variables. These probabilities sum to 1 within each cluster (column). For indicators specified as Continuous, the body of the table contains means instead of probabilities. For indicators specified as Ordinal, means are displayed in addition to the conditional probabilities

| <b>6-DP</b>       | Cluster1 | s.e.   | Cluster2 | s.e.   | Cluster3 | s.e.   | Cluster4 | s.e.   | Cluster5 | s.e.   | Cluster6 | s.e.   |
|-------------------|----------|--------|----------|--------|----------|--------|----------|--------|----------|--------|----------|--------|
| Cluster Size      | 32,70%   | 0,0358 | 27,76%   | 0,0317 | 12,74%   | 0,0212 | 10,85%   | 0,0134 | 10,60%   | 0,0141 | 5,34%    | 0,0111 |
| <b>Indicators</b> |          |        |          |        |          |        |          |        |          |        |          |        |
| dlva0             |          |        |          |        |          |        |          |        |          |        |          |        |
| 1                 | 0,8458   | 0,0239 | 0,8057   | 0,0308 | 0,5814   | 0,052  | 0,0542   | 0,0292 | 0,1119   | 0,0435 | 0,6516   | 0,0706 |
| 2                 | 0,1165   | 0,0151 | 0,1373   | 0,017  | 0,2047   | 0,0213 | 0,0849   | 0,0243 | 0,1274   | 0,0242 | 0,1913   | 0,0239 |
| 3                 | 0,0312   | 0,0087 | 0,0455   | 0,0124 | 0,1404   | 0,0252 | 0,2586   | 0,0283 | 0,2824   | 0,03   | 0,1093   | 0,0318 |
| 4                 | 0,0064   | 0,0031 | 0,0115   | 0,0057 | 0,0735   | 0,0223 | 0,6023   | 0,0656 | 0,4783   | 0,0642 | 0,0477   | 0,0243 |
| Mean              | 1,1982   | 0,0368 | 1,263    | 0,0523 | 1,7061   | 0,1122 | 3,409    | 0,1432 | 3,1272   | 0,1668 | 1,5532   | 0,1466 |
| vasl0             |          |        |          |        |          |        |          |        |          |        |          |        |
| Mean              | 7,2668   | 0,1627 | 7,448    | 0,1106 | 3,3946   | 0,233  | 5,4209   | 0,2215 | 7,1224   | 0,1579 | 5,4245   | 0,4437 |
| vasb0             |          |        |          |        |          |        |          |        |          |        |          |        |
| 0                 | 0,837    | 0,0695 | 0,0345   | 0,0169 | 0,6567   | 0,0539 | 0,5046   | 0,0582 | 0,0027   | 0,0022 | 0,0049   | 0,0039 |
| 1                 | 0,1614   | 0,0678 | 0,5394   | 0,0484 | 0,3346   | 0,051  | 0,473    | 0,0518 | 0,2062   | 0,0564 | 0,2649   | 0,0698 |
| 2                 | 0,0016   | 0,0019 | 0,4261   | 0,0525 | 0,0086   | 0,0052 | 0,0224   | 0,013  | 0,7911   | 0,0581 | 0,7302   | 0,0728 |
| Mean              | 0,1646   | 0,0712 | 1,3915   | 0,0611 | 0,3519   | 0,0571 | 0,5178   | 0,0666 | 1,7884   | 0,0599 | 1,7254   | 0,0759 |
| tlep0             |          |        |          |        |          |        |          |        |          |        |          |        |
| 1                 | 0,1719   | 0,0215 | 0,194    | 0,025  | 0,1914   | 0,0351 | 0,176    | 0,0352 | 0,0297   | 0,0132 | 0,1325   | 0,0428 |
| 2                 | 0,3639   | 0,0183 | 0,3733   | 0,0189 | 0,3723   | 0,021  | 0,3658   | 0,0226 | 0,1955   | 0,0361 | 0,3405   | 0,0339 |
| 3                 | 0,4641   | 0,0304 | 0,4327   | 0,034  | 0,4362   | 0,048  | 0,4582   | 0,0509 | 0,7748   | 0,0487 | 0,527    | 0,0734 |
| Mean              | 2,2922   | 0,0493 | 2,2387   | 0,0565 | 2,2448   | 0,0815 | 2,2822   | 0,0846 | 2,745    | 0,0616 | 2,3945   | 0,1153 |
| tlda0             |          |        |          |        |          |        |          |        |          |        |          |        |
| 1                 | 0,9315   | 0,0187 | 0,9356   | 0,0282 | 0,988    | 0,0299 | 0,0096   | 0,0259 | 0,0715   | 0,0461 | 0,885    | 0,073  |
| 2                 | 0,0685   | 0,0187 | 0,0644   | 0,0282 | 0,012    | 0,0299 | 0,9904   | 0,0259 | 0,9285   | 0,0461 | 0,115    | 0,073  |
| fabq10            |          |        |          |        |          |        |          |        |          |        |          |        |
| 0                 | 0,1364   | 0,0183 | 0,1593   | 0,0206 | 0,2026   | 0,0341 | 0,2113   | 0,034  | 0,1546   | 0,03   | 0,1821   | 0,0457 |
| 1                 | 0,066    | 0,0092 | 0,0736   | 0,0102 | 0,0868   | 0,0134 | 0,0892   | 0,0134 | 0,0721   | 0,0123 | 0,0807   | 0,0162 |

|                |        |        |        |        |        |        |        |        |        |        |        |        |
|----------------|--------|--------|--------|--------|--------|--------|--------|--------|--------|--------|--------|--------|
| 2              | 0,0431 | 0,0068 | 0,0459 | 0,0072 | 0,0502 | 0,008  | 0,0509 | 0,008  | 0,0454 | 0,0076 | 0,0483 | 0,0084 |
| 3              | 0,2715 | 0,0151 | 0,2767 | 0,0151 | 0,28   | 0,015  | 0,2799 | 0,0151 | 0,2758 | 0,0157 | 0,2794 | 0,0153 |
| 4              | 0,1115 | 0,0108 | 0,1086 | 0,0106 | 0,1019 | 0,011  | 0,1004 | 0,011  | 0,1092 | 0,0111 | 0,1052 | 0,0122 |
| 5              | 0,135  | 0,0133 | 0,1256 | 0,0129 | 0,1092 | 0,0149 | 0,1061 | 0,0145 | 0,1275 | 0,0157 | 0,1168 | 0,0195 |
| 6              | 0,2365 | 0,0226 | 0,2102 | 0,0225 | 0,1694 | 0,0291 | 0,1622 | 0,0277 | 0,2153 | 0,033  | 0,1875 | 0,0429 |
| Mean           | 3,507  | 0,139  | 3,3193 | 0,1486 | 2,9968 | 0,2318 | 2,9358 | 0,2257 | 3,3568 | 0,2299 | 3,1452 | 0,3321 |
| pain_dis       |        |        |        |        |        |        |        |        |        |        |        |        |
| 0              | 0,9977 | 0,0067 | 0,5112 | 0,0587 | 0,8816 | 0,0381 | 0,8265 | 0,0465 | 0,1931 | 0,0516 | 0,0054 | 0,0157 |
| 1              | 0,0009 | 0,0045 | 0,3929 | 0,0515 | 0,1048 | 0,0361 | 0,1725 | 0,0449 | 0,6288 | 0,0585 | 0,7002 | 0,0731 |
| 2              | 0,0013 | 0,0046 | 0,0909 | 0,021  | 0,0136 | 0,0124 | 0,0009 | 0,011  | 0,1452 | 0,0402 | 0,0004 | 0,0052 |
| 3              | 0      | 0,0003 | 0,0051 | 0,006  | 0,0001 | 0,001  | 0      | 0,0006 | 0,0329 | 0,0229 | 0,294  | 0,0727 |
| domin_bp       |        |        |        |        |        |        |        |        |        |        |        |        |
| 0              | 0,0039 | 0,0044 | 0,0269 | 0,015  | 0,0002 | 0,0015 | 0,0002 | 0,0014 | 0,225  | 0,0505 | 0,9243 | 0,1152 |
| 1              | 0,9961 | 0,0044 | 0,9731 | 0,015  | 0,9998 | 0,0015 | 0,9998 | 0,0014 | 0,775  | 0,0505 | 0,0757 | 0,1152 |
| paraspin_debut |        |        |        |        |        |        |        |        |        |        |        |        |
| 0              | 0,3291 | 0,0343 | 0,3529 | 0,0396 | 0,4036 | 0,0586 | 0,354  | 0,0567 | 0,5652 | 0,0602 | 0,5259 | 0,0873 |
| 1              | 0,6709 | 0,0343 | 0,6471 | 0,0396 | 0,5964 | 0,0586 | 0,646  | 0,0567 | 0,4348 | 0,0602 | 0,4741 | 0,0873 |

| Loadings, pain domain v.2<br>Sum.score, 6-DP | Clusters | R <sup>2</sup> | Loadings                                                                                                                                                                                                                                                                                                                                       |
|----------------------------------------------|----------|----------------|------------------------------------------------------------------------------------------------------------------------------------------------------------------------------------------------------------------------------------------------------------------------------------------------------------------------------------------------|
| dlva0                                        | 0,746    | 0,5565         | <p>The quantities reported under Clusters are simply correlations, representing the square root of the corresponding 'R2' or communality of the associated indicator.</p> <p>Correlations: These are standardised values for the loadings reported in the Loadings output. They represent correlations between the indicators and factors.</p> |
| vasl0                                        | 0,6686   | 0,447          |                                                                                                                                                                                                                                                                                                                                                |
| vasb0                                        | 0,805    | 0,6479         |                                                                                                                                                                                                                                                                                                                                                |
| tlep0                                        | 0,2024   | 0,041          |                                                                                                                                                                                                                                                                                                                                                |
| tlda0                                        | 0,8499   | 0,7223         |                                                                                                                                                                                                                                                                                                                                                |
| fabq10                                       | 0,0997   | 0,0099         |                                                                                                                                                                                                                                                                                                                                                |
| pain_dis                                     | 0,5899   | 0,348          |                                                                                                                                                                                                                                                                                                                                                |
| domin_bp                                     | 0,7689   | 0,5911         |                                                                                                                                                                                                                                                                                                                                                |
| paraspin_debut                               | 0,1587   | 0,0252         |                                                                                                                                                                                                                                                                                                                                                |

**Profiles in numbers – pain domain v.2, 7-DP, sum.score**

The first row of numbers shows how large each cluster is. The body of the table contains (marginal) conditional probabilities that show how the clusters are related to the Nominal or Ordinal indicator variables. These probabilities sum to 1 within each cluster (column). For indicators specified as Continuous, the body of the table contains means instead of probabilities. For indicators specified as Ordinal, means are displayed in addition to the conditional probabilities

| <b>7-DP</b>       | Cluster1 | s.e.   | Cluster2 | s.e.   | Cluster3 | s.e.   | Cluster4 | s.e.   | Cluster5 | s.e.   | Cluster6 | s.e.   | Cluster7 | s.e.   |
|-------------------|----------|--------|----------|--------|----------|--------|----------|--------|----------|--------|----------|--------|----------|--------|
| Cluster Size      | 30,01%   | 0,0262 | 26,80%   | 0,0285 | 12,65%   | 0,0218 | 10,02%   | 0,0125 | 9,96%    | 0,013  | 6,22%    | 0,0153 | 4,34%    | 0,0104 |
| <b>Indicators</b> |          |        |          |        |          |        |          |        |          |        |          |        |          |        |
| dlva0             |          |        |          |        |          |        |          |        |          |        |          |        |          |        |
| 1                 | 0,8062   | 0,0283 | 0,8461   | 0,0254 | 0,599    | 0,0525 | 0,0346   | 0,023  | 0,0597   | 0,0365 | 0,887    | 0,0658 | 0,4123   | 0,086  |
| 2                 | 0,1421   | 0,017  | 0,12     | 0,0167 | 0,2151   | 0,0247 | 0,0733   | 0,0253 | 0,1009   | 0,03   | 0,0938   | 0,045  | 0,2301   | 0,0248 |
| 3                 | 0,0433   | 0,0117 | 0,0294   | 0,0091 | 0,1334   | 0,0262 | 0,2684   | 0,0328 | 0,2943   | 0,0326 | 0,0171   | 0,0181 | 0,2218   | 0,0443 |
| 4                 | 0,0084   | 0,0045 | 0,0046   | 0,0026 | 0,0525   | 0,0187 | 0,6238   | 0,0656 | 0,545    | 0,0727 | 0,002    | 0,0033 | 0,1357   | 0,0535 |
| Mean              | 1,2538   | 0,0463 | 1,1924   | 0,0378 | 1,6395   | 0,1052 | 3,4813   | 0,1312 | 3,3246   | 0,1688 | 1,1341   | 0,0901 | 2,081    | 0,2213 |
| vasl0             |          |        |          |        |          |        |          |        |          |        |          |        |          |        |
| Mean              | 7,3099   | 0,1145 | 7,3941   | 0,173  | 3,5259   | 0,2586 | 5,4443   | 0,2263 | 7,1588   | 0,1472 | 7,8282   | 0,257  | 3,1772   | 0,3986 |
| vasb0             |          |        |          |        |          |        |          |        |          |        |          |        |          |        |
| 0                 | 0,033    | 0,0476 | 0,9851   | 0,0421 | 0,7415   | 0,0613 | 0,533    | 0,061  | 0,0014   | 0,0022 | 0        | 0,0001 | 0,0174   | 0,0248 |
| 1                 | 0,6712   | 0,0492 | 0,0149   | 0,0421 | 0,2566   | 0,0592 | 0,4584   | 0,0581 | 0,2248   | 0,0576 | 0,0294   | 0,0587 | 0,573    | 0,0908 |
| 2                 | 0,2958   | 0,0463 | 0        | 0      | 0,0019   | 0,0034 | 0,0086   | 0,0128 | 0,7738   | 0,0584 | 0,9706   | 0,0588 | 0,4097   | 0,0939 |
| Mean              | 1,2628   | 0,08   | 0,0149   | 0,0422 | 0,2604   | 0,0635 | 0,4755   | 0,0662 | 1,7724   | 0,0593 | 1,9706   | 0,0588 | 1,3923   | 0,1031 |
| tlep0             |          |        |          |        |          |        |          |        |          |        |          |        |          |        |
| 1                 | 0,1994   | 0,0245 | 0,1771   | 0,0244 | 0,1865   | 0,0357 | 0,1812   | 0,0373 | 0,0342   | 0,0147 | 0,0748   | 0,0324 | 0,1513   | 0,0534 |
| 2                 | 0,3757   | 0,0188 | 0,3669   | 0,019  | 0,3709   | 0,0216 | 0,3687   | 0,0227 | 0,2079   | 0,0366 | 0,2829   | 0,0445 | 0,3534   | 0,035  |
| 3                 | 0,4249   | 0,0328 | 0,456    | 0,0342 | 0,4426   | 0,0495 | 0,4502   | 0,053  | 0,7579   | 0,0505 | 0,6424   | 0,0754 | 0,4953   | 0,0848 |
| Mean              | 2,2255   | 0,0548 | 2,2789   | 0,0563 | 2,2561   | 0,0836 | 2,269    | 0,0888 | 2,7236   | 0,0648 | 2,5676   | 0,1072 | 2,3439   | 0,1373 |
| tlda0             |          |        |          |        |          |        |          |        |          |        |          |        |          |        |
| 1                 | 0,9231   | 0,0232 | 0,9268   | 0,0196 | 0,9845   | 0,025  | 0,0099   | 0,0282 | 0,0789   | 0,0454 | 0,8441   | 0,0751 | 0,7984   | 0,0923 |
| 2                 | 0,0769   | 0,0232 | 0,0732   | 0,0196 | 0,0155   | 0,025  | 0,9901   | 0,0282 | 0,9211   | 0,0454 | 0,1559   | 0,0751 | 0,2016   | 0,0923 |
| fabq10            |          |        |          |        |          |        |          |        |          |        |          |        |          |        |
| 0                 | 0,1663   | 0,0202 | 0,1275   | 0,0182 | 0,2106   | 0,0366 | 0,2136   | 0,0359 | 0,157    | 0,031  | 0,1535   | 0,043  | 0,1465   | 0,047  |
| 1                 | 0,076    | 0,0102 | 0,0629   | 0,0091 | 0,0891   | 0,014  | 0,09     | 0,0138 | 0,073    | 0,0126 | 0,0718   | 0,016  | 0,0695   | 0,0173 |
| 2                 | 0,0468   | 0,0073 | 0,0419   | 0,0067 | 0,0509   | 0,0081 | 0,0511   | 0,0081 | 0,0458   | 0,0077 | 0,0453   | 0,0084 | 0,0445   | 0,0088 |
| 3                 | 0,2782   | 0,0151 | 0,2692   | 0,0152 | 0,2803   | 0,0151 | 0,2802   | 0,0151 | 0,2767   | 0,0157 | 0,2761   | 0,0169 | 0,2746   | 0,018  |

|                |        |        |        |        |        |        |        |        |        |        |        |        |        |        |
|----------------|--------|--------|--------|--------|--------|--------|--------|--------|--------|--------|--------|--------|--------|--------|
| 4              | 0,1077 | 0,0105 | 0,1126 | 0,0109 | 0,1006 | 0,0112 | 0,1001 | 0,0111 | 0,109  | 0,0111 | 0,1095 | 0,0118 | 0,1104 | 0,012  |
| 5              | 0,1227 | 0,0125 | 0,1387 | 0,0136 | 0,1062 | 0,0154 | 0,1052 | 0,015  | 0,1264 | 0,016  | 0,1279 | 0,0201 | 0,1307 | 0,0219 |
| 6              | 0,2023 | 0,0212 | 0,2471 | 0,0238 | 0,1623 | 0,0301 | 0,1599 | 0,0288 | 0,2121 | 0,0336 | 0,2159 | 0,0475 | 0,2238 | 0,0541 |
| Mean           | 3,2623 | 0,1413 | 3,5809 | 0,1434 | 2,9388 | 0,2461 | 2,9184 | 0,2377 | 3,3354 | 0,2365 | 3,3636 | 0,3384 | 3,4205 | 0,3789 |
| pain_dis       |        |        |        |        |        |        |        |        |        |        |        |        |        |        |
| 0              | 0,6392 | 0,0427 | 0,9942 | 0,0214 | 0,9534 | 0,0272 | 0,8629 | 0,0487 | 0,2093 | 0,0531 | 0,0398 | 0,0462 | 0,0494 | 0,0689 |
| 1              | 0,2918 | 0,037  | 0,0037 | 0,018  | 0,0343 | 0,0244 | 0,1368 | 0,0486 | 0,6107 | 0,0593 | 0,7484 | 0,0822 | 0,7277 | 0,0926 |
| 2              | 0,0659 | 0,0202 | 0,0021 | 0,0057 | 0,0123 | 0,0121 | 0,0002 | 0,0031 | 0,1506 | 0,0406 | 0,0948 | 0,065  | 0,0003 | 0,0037 |
| 3              | 0,0031 | 0,0045 | 0      | 0,0002 | 0      | 0,0005 | 0      | 0,0006 | 0,0294 | 0,0205 | 0,117  | 0,0538 | 0,2227 | 0,0793 |
| domin_bp       |        |        |        |        |        |        |        |        |        |        |        |        |        |        |
| 0              | 0,014  | 0,0099 | 0,004  | 0,0045 | 0,0002 | 0,0016 | 0,0001 | 0,0013 | 0,216  | 0,0479 | 0,5059 | 0,1198 | 0,5645 | 0,1163 |
| 1              | 0,986  | 0,0099 | 0,996  | 0,0045 | 0,9998 | 0,0016 | 0,9999 | 0,0013 | 0,784  | 0,0479 | 0,4941 | 0,1198 | 0,4355 | 0,1163 |
| paraspin_debut |        |        |        |        |        |        |        |        |        |        |        |        |        |        |
| 0              | 0,3427 | 0,0354 | 0,3151 | 0,0346 | 0,3951 | 0,058  | 0,3469 | 0,059  | 0,5672 | 0,061  | 0,5465 | 0,097  | 0,4809 | 0,1041 |
| 1              | 0,6573 | 0,0354 | 0,6849 | 0,0346 | 0,6049 | 0,058  | 0,6531 | 0,059  | 0,4328 | 0,061  | 0,4535 | 0,097  | 0,5191 | 0,1041 |

| Loadings, pain domain v.2<br>Sum.score, 7-DP | Clusters | R <sup>2</sup> | Loadings                                                                                                                                                                                                                                                                                                                                                  |
|----------------------------------------------|----------|----------------|-----------------------------------------------------------------------------------------------------------------------------------------------------------------------------------------------------------------------------------------------------------------------------------------------------------------------------------------------------------|
| dlva0                                        | 0,7827   | 0,6126         | <p>The quantities reported under Clusters are simply correlations, representing the square root of the corresponding 'R<sup>2</sup>' or communality of the associated indicator.</p> <p>Correlations: These are standardised values for the loadings reported in the Loadings output. They represent correlations between the indicators and factors.</p> |
| vasl0                                        | 0,7289   | 0,5313         |                                                                                                                                                                                                                                                                                                                                                           |
| vasb0                                        | 0,8606   | 0,7407         |                                                                                                                                                                                                                                                                                                                                                           |
| tlep0                                        | 0,2094   | 0,0438         |                                                                                                                                                                                                                                                                                                                                                           |
| tlda0                                        | 0,8111   | 0,658          |                                                                                                                                                                                                                                                                                                                                                           |
| fabq10                                       | 0,1129   | 0,0127         |                                                                                                                                                                                                                                                                                                                                                           |
| pain_dis                                     | 0,6108   | 0,3731         |                                                                                                                                                                                                                                                                                                                                                           |
| domin_bp                                     | 0,603    | 0,3636         |                                                                                                                                                                                                                                                                                                                                                           |
| paraspin_debut                               | 0,1761   | 0,031          |                                                                                                                                                                                                                                                                                                                                                           |

## Activity domain – summary-score strategy

**Profile-plots:** Results with 2 to 7 domain profiles based on the following variables:

|           |                                                                                                                  |
|-----------|------------------------------------------------------------------------------------------------------------------|
| Rmprop    | Sum-score representing the Roland Morris Disability Questionnaire. The higher score the more activity limitation |
| Fabq130   | I cannot do my normal work with my present pain (disagree, don't know, agree)                                    |
| facetsit  | Best posture is to sit (1=yes)                                                                                   |
| facetwalk | Best activity is to walk (1=yes)                                                                                 |

### AMN's suggestion on final model: 5 domain profiles (clusters) – profile plot at page 5

Cluster 1: Moderate activity limitation, ok to work despite pain, prefer to walk

Cluster 2: Fairly high activity limitation, might be able to work, prefer to walk

Cluster 3: Low activity limitation, can work, prefer to walk

Cluster 4: Fairly high activity limitation, cannot work, prefer to walk

Cluster 5: Fairly high activity limitation, might be able to work, prefer to sit

### Facts:

Lowest cluster size = 5.27 %

The seed used was based on the lowest BIC appearing 4 out of 10 rounds within the statistical analysis

## AMN's suggestion on final model: 7-domain profiles (clusters)

### Facts:

Lowest cluster size = 8.9%

The used seed was based on the BIC appearing most often (4/10) within the statistical analysis

### Description of clusters – activity domain, summary-score strategy – 7-domain profiles

**Bold text** where the probability of the subgroup solution described is above 80% and 'rmprop s.e.' less than 5.00.

**Cluster 1: High activity limitation, fully agree that cannot work with present pain, fully disagree on 'best posture is to sit' and agree on 'best activity is to walk'**

**Cluster 2: High activity limitation, fully disagree that cannot work with present pain, fully disagree on 'best posture is to sit' and agree on 'best activity is to walk'**

**Cluster 3: Moderate activity limitation, disagree that cannot work with present pain, don't know if 'best posture is to sit', agree on 'best activity is to walk' (a lot of variation within the profile, 'the garbage bag')**

**Cluster 4: Low activity limitation, fully disagree that cannot work with present pain, fully disagree on 'best posture is to sit', fully agree on 'best activity is to walk'**

**Cluster 5: Very low activity limitation, fully disagree that cannot work with present pain, disagree on 'best posture is to sit', fully agree on 'best activity is to walk'**

**Cluster 6: Low activity limitation, fully disagree that cannot work with present pain, fully disagree on 'best posture is to sit', fully disagree on 'best activity is to walk'**

**Cluster 7: High activity limitation, don't know if one cannot work with present pain, don't know if 'best posture is to sit' and fully disagree on 'best activity is to walk'**

### Activity domain, summary-score, 2-domain profiles

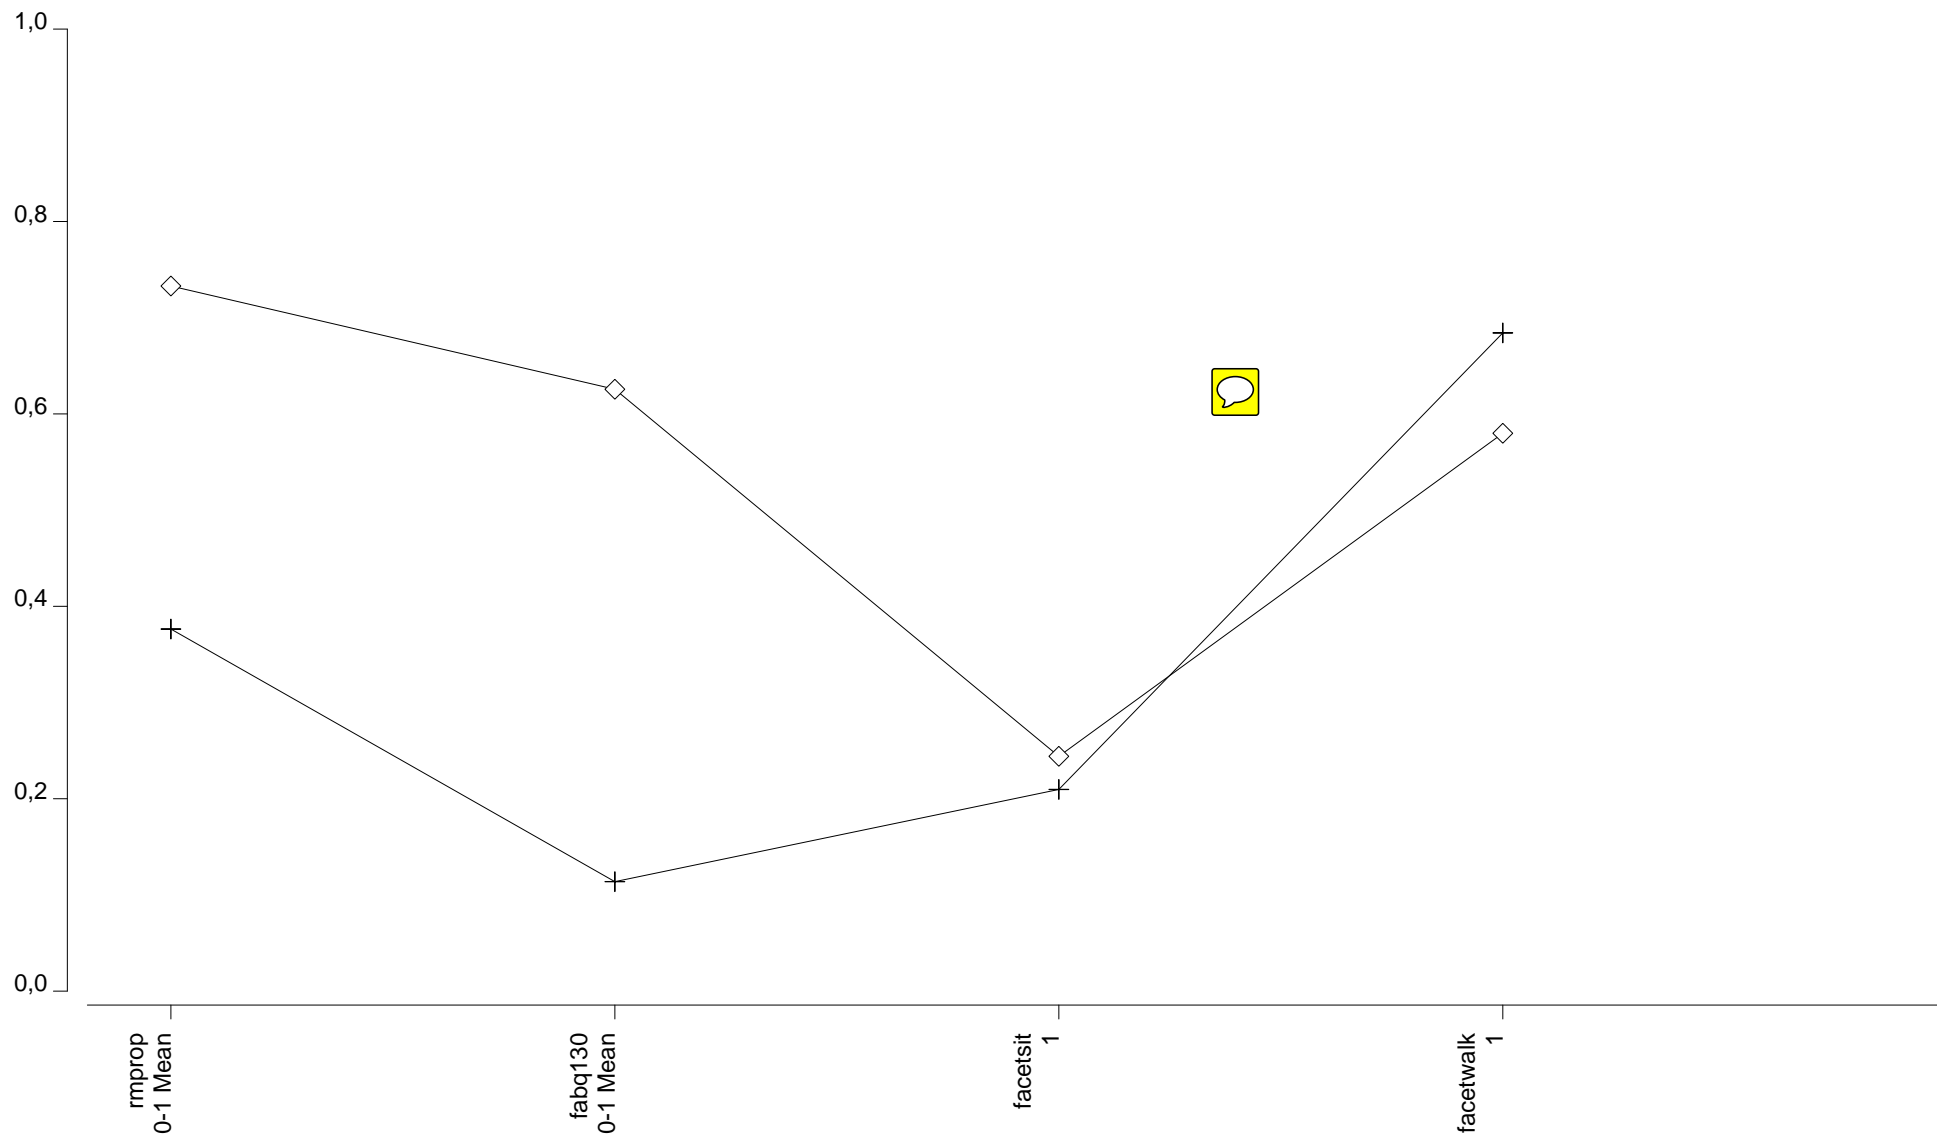

Cluster1 +  
Cluster2 ◇

**Cluster 1: Some activity limitation, can work despite pain**

**Cluster 2: Fairly high activity limitation, cannot work because of pain**

**Lowest cluster size = 39.26%**



### Activity domain, summary-score, 3-domain profiles

Clusters 1 and 3 in this 3-domain profile model represents cluster 1 in the 2-domain profile model with only a quantitative difference in the rmprop and fabq130 variables

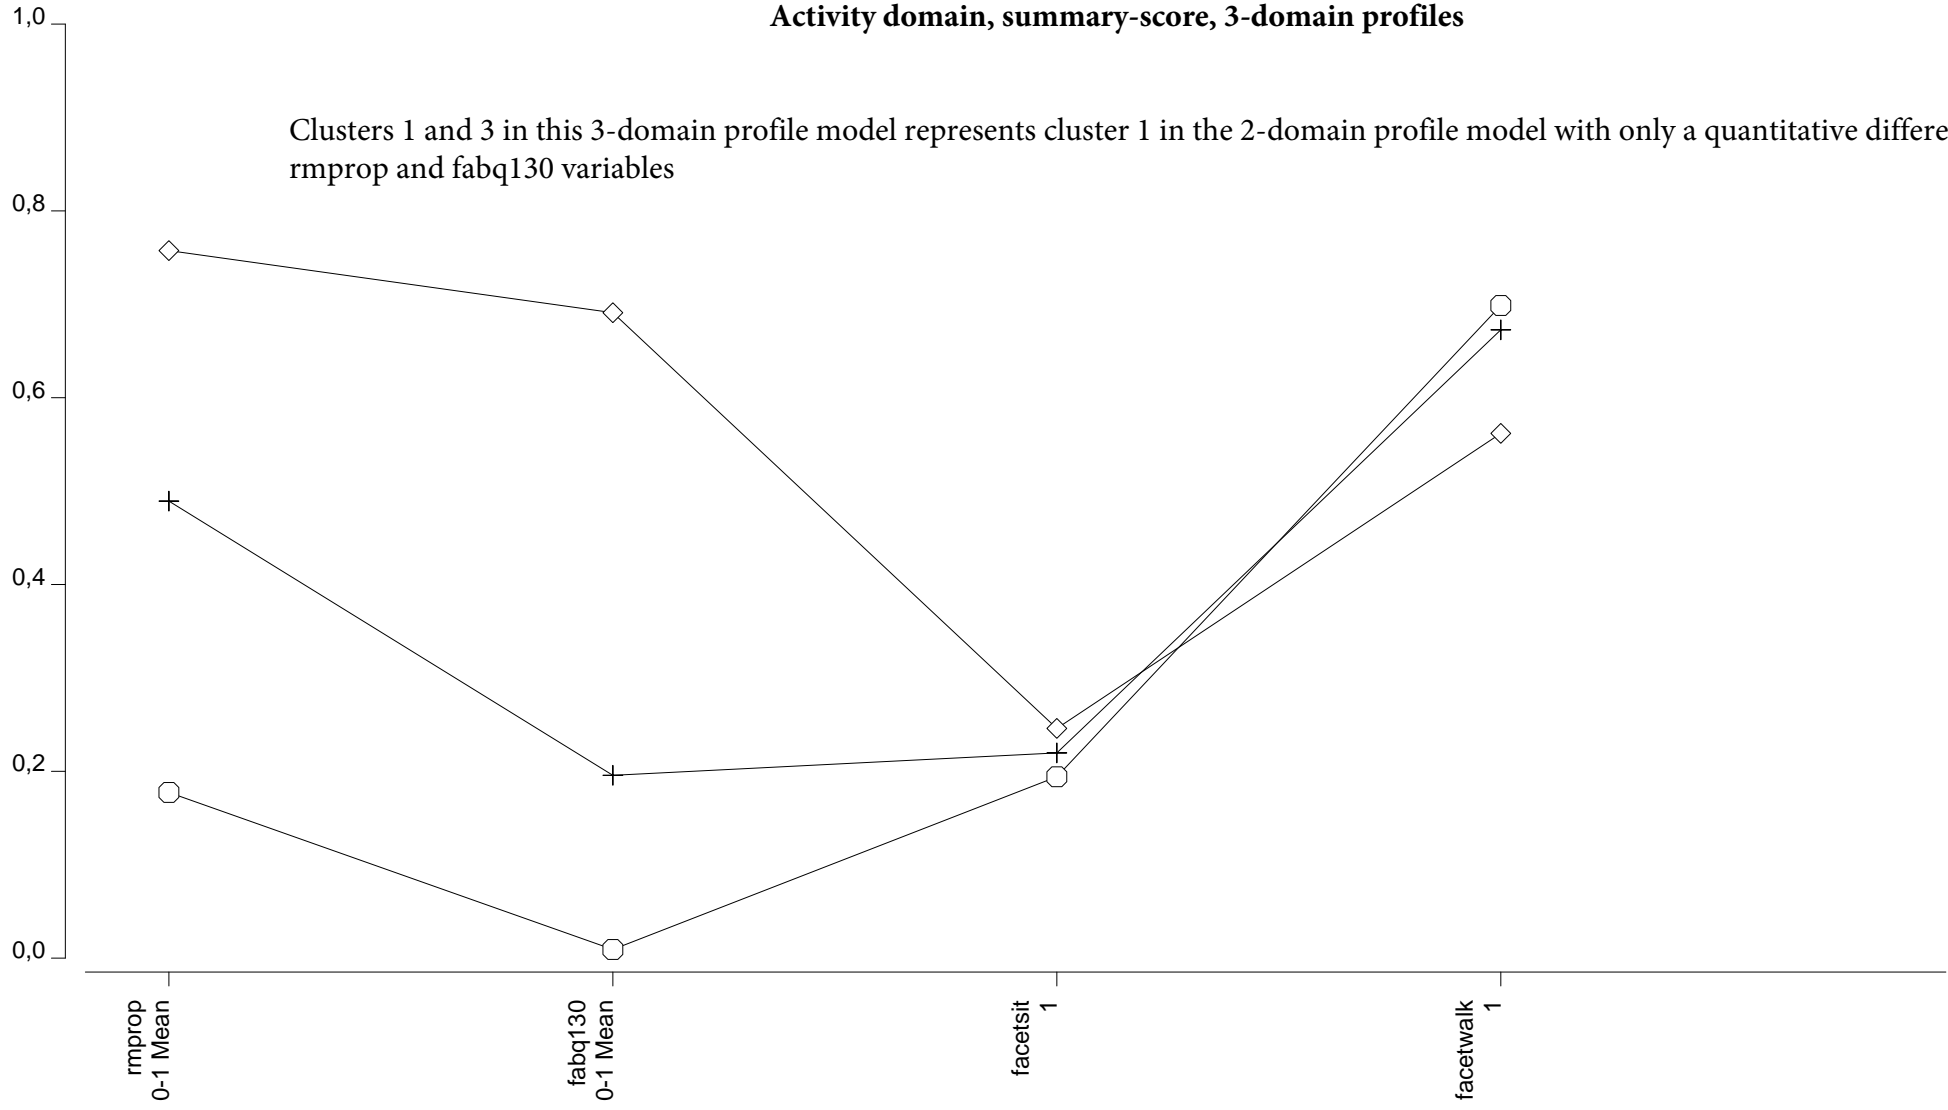

Cluster1 +  
Cluster2 ◇  
Cluster3 ○ **Lowest cluster size = 17.84%**

### Activity domain, summary-score, 4-domain profiles

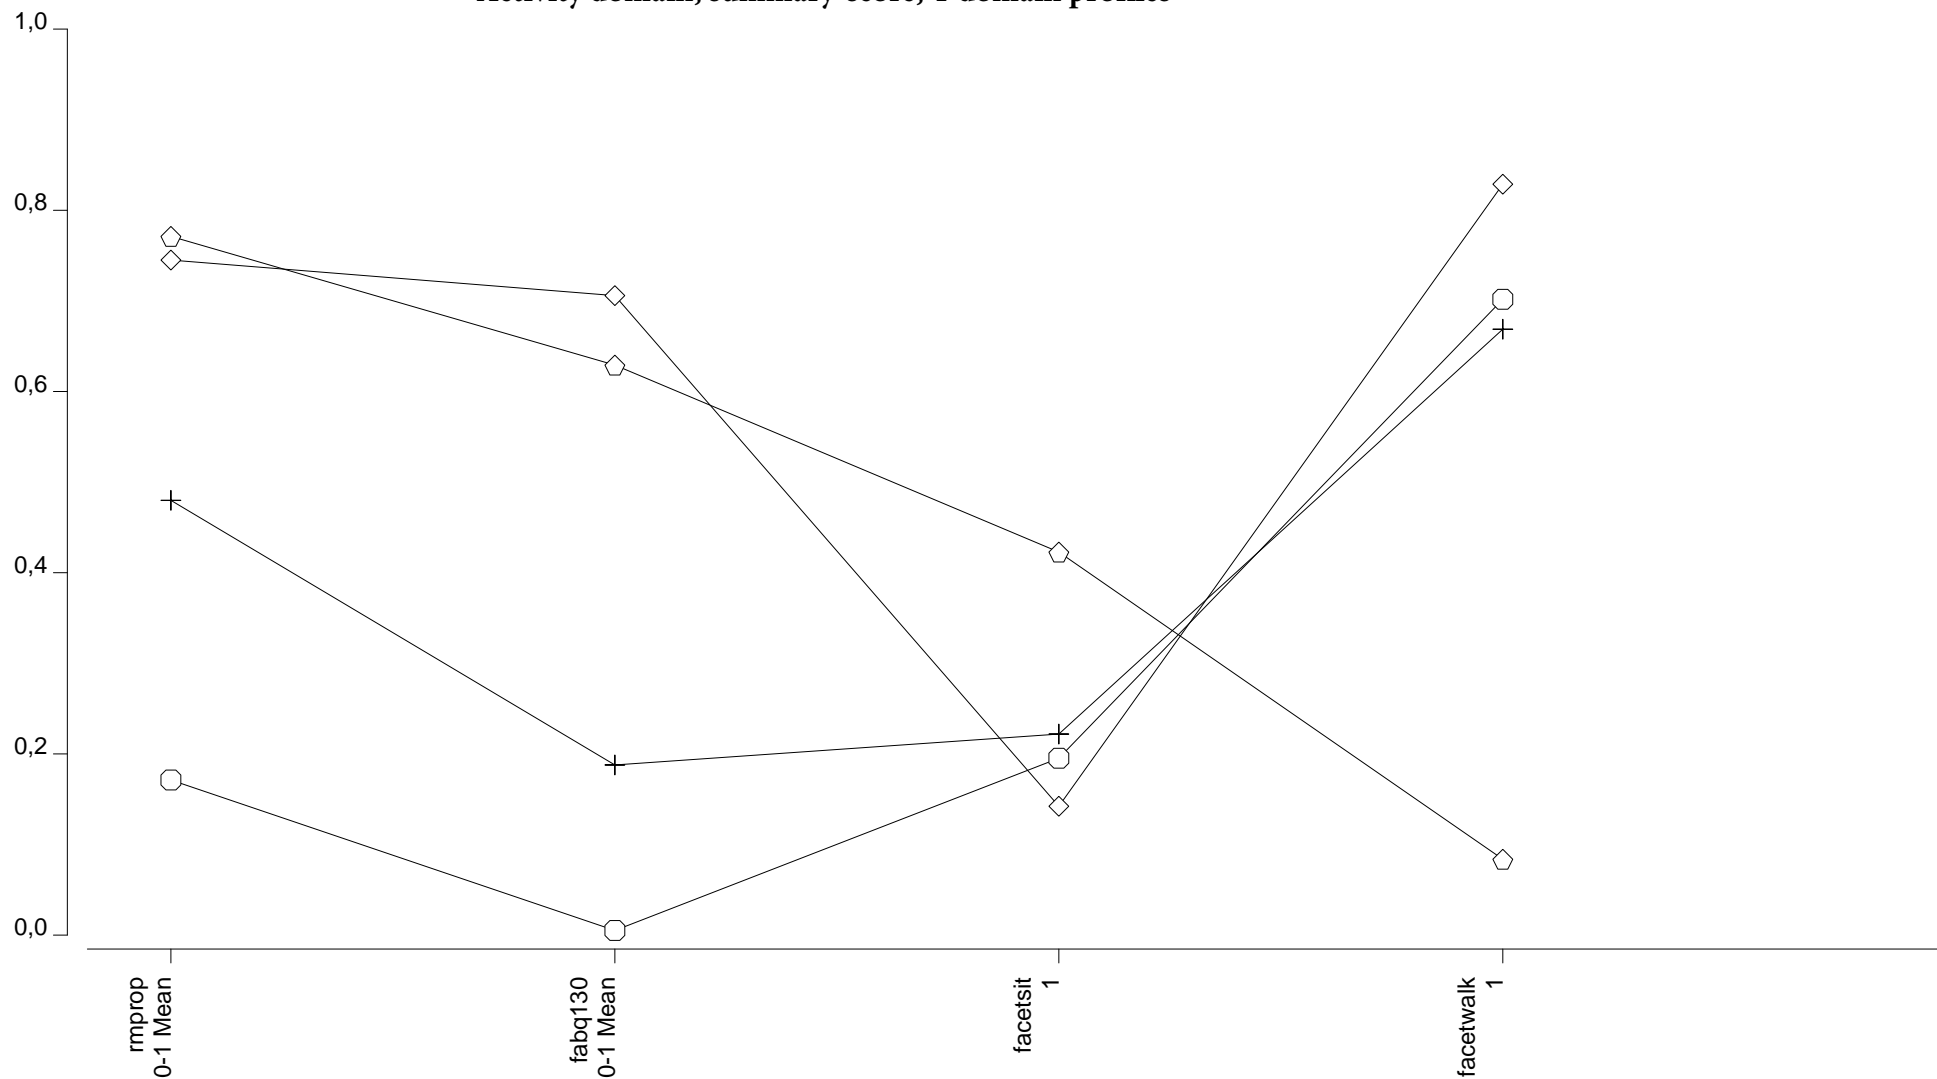

Cluster1 +  
Cluster2 ◇  
Cluster3 ○  
Cluster4 ◊

**Cluster 1: Moderate activity limitation, ok to work despite pain, prefer to walk**

**Cluster 2: fairly high activity limitation, cannot work, prefer to walk**

**Cluster 3: low activity limitation, can work, prefer to walk**

**Cluster 4: Fairly high activity limitation, cannot work, prefer to sit**

**Lowest cluster size = 11.12%**

### Activity domain, summary-score, 5-domain profiles

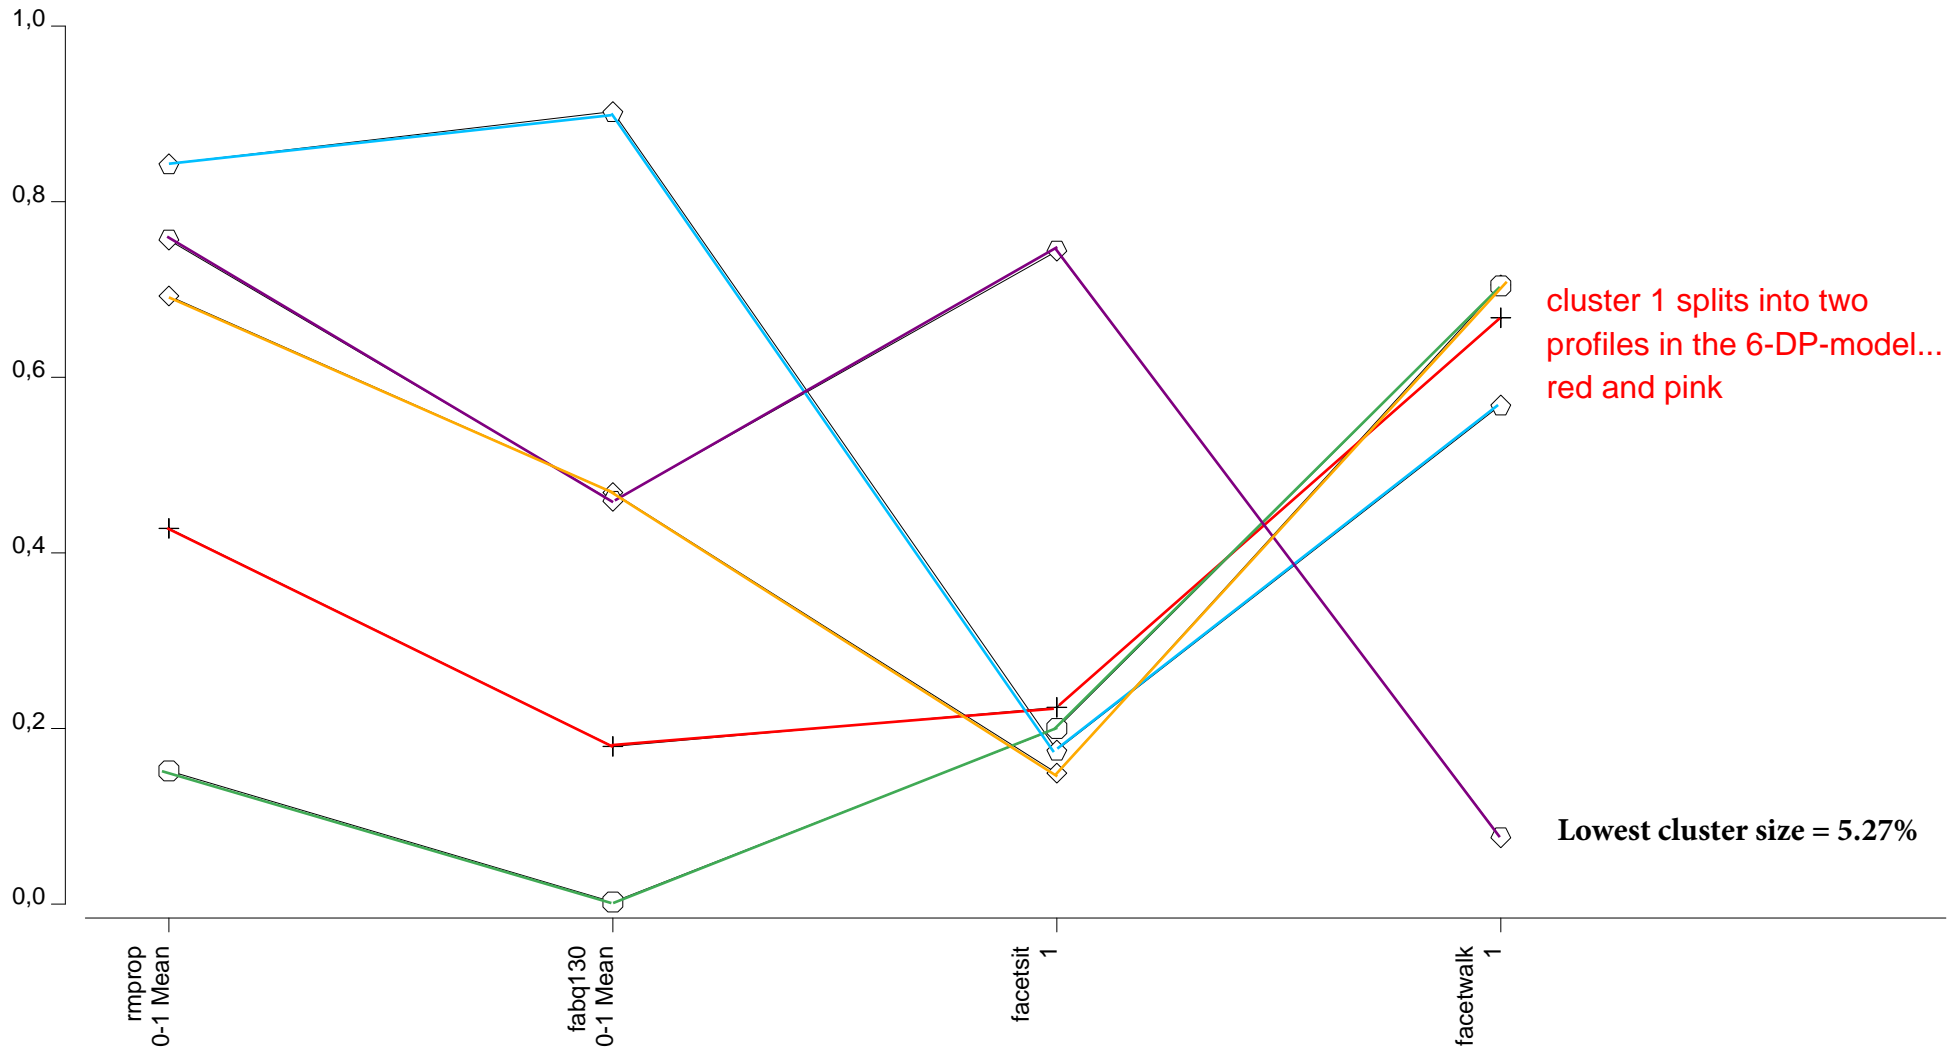

cluster 1 splits into two profiles in the 6-DP-model... red and pink

Lowest cluster size = 5.27%

- Cluster1 +
- Cluster2 ◇
- Cluster3 ○
- Cluster4 ◇
- Cluster5 ◇

Cluster 4 within the 4-domain profiles model is represented within the cluster 2 and 5 in this 5-domain profile model. Cluster 5 which 'prefers to sit' becomes more distinct.

- Cluster 1: Moderate activity limitation, ok to work despite pain, prefer to walk
- Cluster 2: Fairly high activity limitation, might be able to work, prefer to walk
- Cluster 3: Low activity limitation, can work, prefer to walk
- Cluster 4: Fairly high activity limitation, cannot work, prefer to walk
- Cluster 5: Fairly high activity limitation, might be able to work, prefer to sit

### Activity domain, summary-score, 6-domain profiles

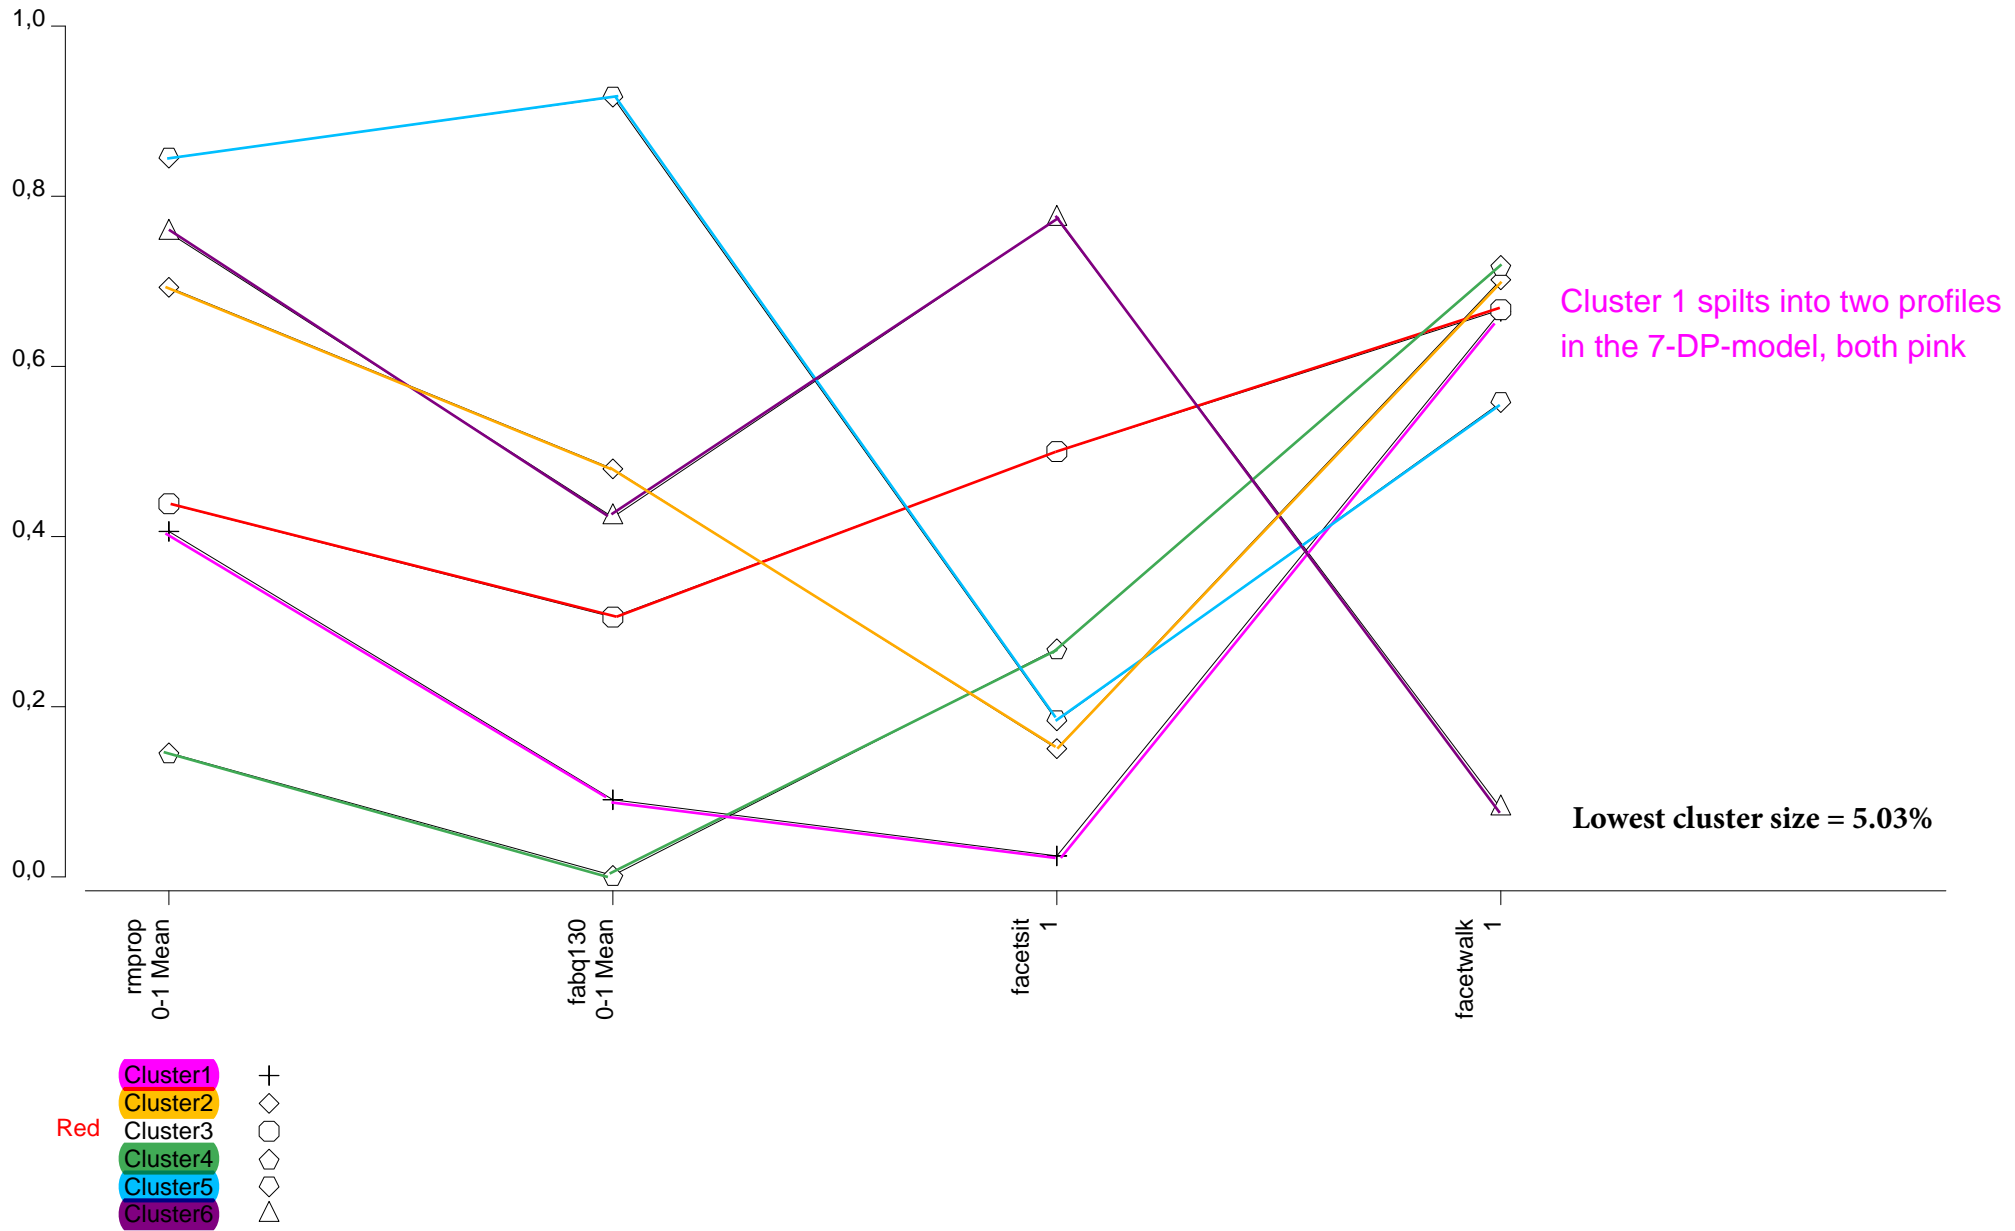

Activity domain, summary-score strategy, 7-domain profiles

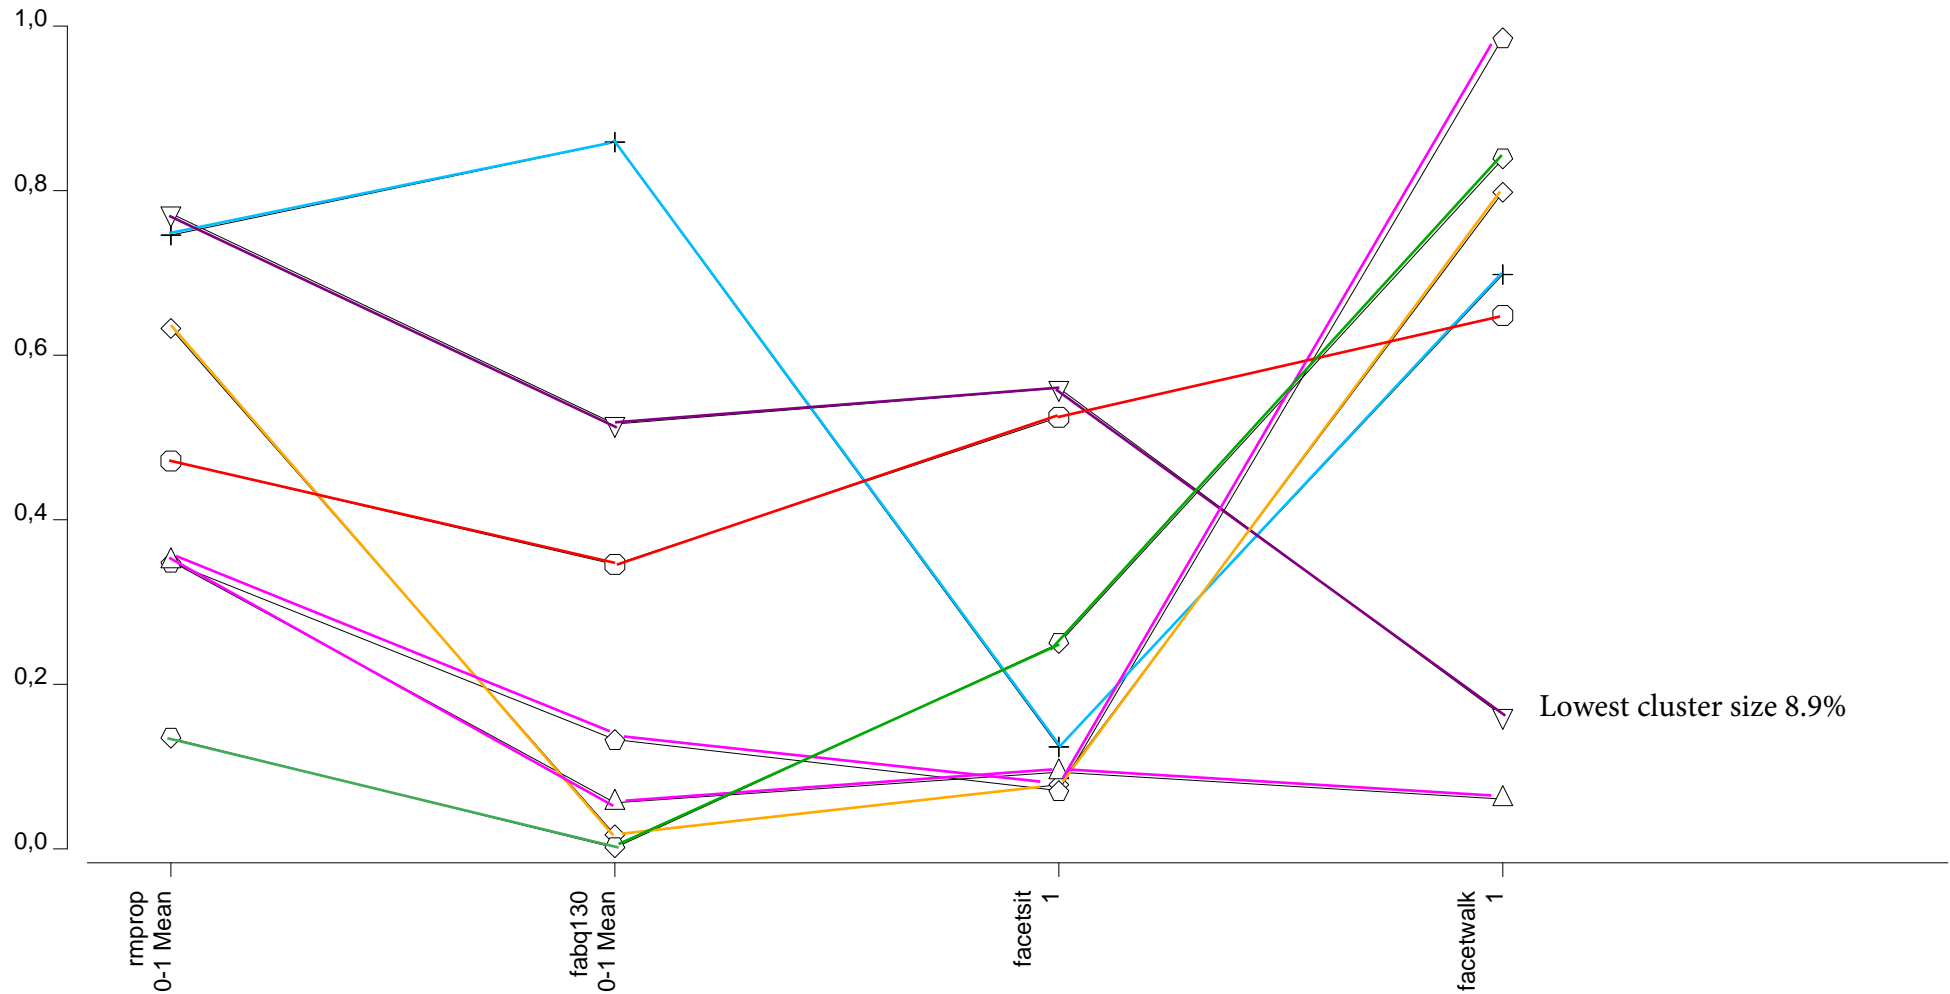

Lowest cluster size 8.9%

- Cluster1 + Cluster 1: High act. limitation, fully agree cannot work, fully disagree 'best posture is to sit', agree 'best activity is to walk'
- Cluster2 ◇ Cluster 2: High act. limitation, fully disagree cannot work, fully disagree 'best posture is to sit', agree 'best activity is to walk'
- Cluster3 ○ Cluster 3: 'The garbage bag': moderate act.limitation, don't know if cannot work and if 'best posture is to sit', agree 'best activity is to walk'
- Cluster4 ◇ Cluster 4: Low act. limitation, fully disagree cannot work, fully disagree 'best posture is to sit', fully agree 'best activity is to walk'
- Cluster5 △ Cluster 5: Very low act.limitation, fully disagree cannot work, fully disagree best posture to sit, fully agree on 'best activity is to walk'
- Cluster6 ▽ Cluster 6: Low act. limitation, fully disagree cannot work, fully disagree 'best posture is to sit', fully disagree 'best activity is to walk'
- Cluster7 ▽ Cluster 7: High act. limitation, don't know if cannot work or 'best posture to sit', fully disagree on 'best activity is to walk'

Larger models tend to have cluster sizes <5% and only differ quantitatively.

| <b>Profile in numbers - 5DP</b>                                                                                                                                                                                                                                                                                                                                                                                                                                                             |          |        |          |        |          |        |          |        |          |        |
|---------------------------------------------------------------------------------------------------------------------------------------------------------------------------------------------------------------------------------------------------------------------------------------------------------------------------------------------------------------------------------------------------------------------------------------------------------------------------------------------|----------|--------|----------|--------|----------|--------|----------|--------|----------|--------|
| The first row of numbers shows how large each cluster is. The body of the table contains (marginal) conditional probabilities that show how the clusters are related to the Nominal or Ordinal indicator variables. These probabilities sum to 1 within each cluster (column). For indicators specified as Continuous, the body of the table contains means instead of probabilities. For indicators specified as Ordinal, means are displayed in addition to the conditional probabilities |          |        |          |        |          |        |          |        |          |        |
| Activity domain                                                                                                                                                                                                                                                                                                                                                                                                                                                                             | Cluster1 | s.e.   | Cluster2 | s.e.   | Cluster3 | s.e.   | Cluster4 | s.e.   | Cluster5 | s.e.   |
| <b>Sum.score, 5-DP</b>                                                                                                                                                                                                                                                                                                                                                                                                                                                                      |          |        |          |        |          |        |          |        |          |        |
| Cluster Size                                                                                                                                                                                                                                                                                                                                                                                                                                                                                | 43,88%   | 0,0546 | 27,04%   | 0,0643 | 14,36%   | 0,0366 | 9,46%    | 0,0393 | 5,27%    | 0,0378 |
| <b>Indicators</b>                                                                                                                                                                                                                                                                                                                                                                                                                                                                           |          |        |          |        |          |        |          |        |          |        |
| rmprop                                                                                                                                                                                                                                                                                                                                                                                                                                                                                      |          |        |          |        |          |        |          |        |          |        |
| Mean                                                                                                                                                                                                                                                                                                                                                                                                                                                                                        | 42,7726  | 3,2489 | 69,2562  | 2,0546 | 15,1677  | 2,6993 | 84,308   | 2,6557 | 75,622   | 3,6873 |
| fabq130                                                                                                                                                                                                                                                                                                                                                                                                                                                                                     |          |        |          |        |          |        |          |        |          |        |
| 0                                                                                                                                                                                                                                                                                                                                                                                                                                                                                           | 0,7828   | 0,0335 | 0,4804   | 0,0843 | 0,9959   | 0,0132 | 0,0694   | 0,0984 | 0,4906   | 0,156  |
| 1                                                                                                                                                                                                                                                                                                                                                                                                                                                                                           | 0,0756   | 0,0113 | 0,1018   | 0,0136 | 0,0038   | 0,0115 | 0,056    | 0,0344 | 0,1016   | 0,0135 |
| 2                                                                                                                                                                                                                                                                                                                                                                                                                                                                                           | 0,1416   | 0,0277 | 0,4178   | 0,0823 | 0,0003   | 0,0017 | 0,8746   | 0,1321 | 0,4078   | 0,154  |
| Mean                                                                                                                                                                                                                                                                                                                                                                                                                                                                                        | 0,3588   | 0,0604 | 0,9374   | 0,166  | 0,0044   | 0,0149 | 1,8052   | 0,2304 | 0,9173   | 0,3096 |
| facetsit                                                                                                                                                                                                                                                                                                                                                                                                                                                                                    |          |        |          |        |          |        |          |        |          |        |
| 0                                                                                                                                                                                                                                                                                                                                                                                                                                                                                           | 0,7761   | 0,0274 | 0,8509   | 0,0493 | 0,8001   | 0,0457 | 0,8247   | 0,0874 | 0,2564   | 0,3689 |
| 1                                                                                                                                                                                                                                                                                                                                                                                                                                                                                           | 0,2239   | 0,0274 | 0,1491   | 0,0493 | 0,1999   | 0,0457 | 0,1753   | 0,0874 | 0,7436   | 0,3689 |
| facetwalk                                                                                                                                                                                                                                                                                                                                                                                                                                                                                   |          |        |          |        |          |        |          |        |          |        |
| 0                                                                                                                                                                                                                                                                                                                                                                                                                                                                                           | 0,3323   | 0,0313 | 0,2949   | 0,0779 | 0,2961   | 0,0524 | 0,4317   | 0,1045 | 0,9246   | 0,1808 |
| 1                                                                                                                                                                                                                                                                                                                                                                                                                                                                                           | 0,6677   | 0,0313 | 0,7051   | 0,0779 | 0,7039   | 0,0524 | 0,5683   | 0,1045 | 0,0754   | 0,1808 |

| Loadings - 5DP          | Clusters | R <sup>2</sup> |
|-------------------------|----------|----------------|
| Act. domain, sum. score |          |                |
| rmprop                  | 0,8782   | 0,7713         |
| fabq130                 | 0,5608   | 0,3145         |
| facetsit                | 0,3042   | 0,0926         |
| facetwalk               | 0,2901   | 0,0842         |

#### Loadings

The quantities reported under Clusters are simply correlations, representing the square root of the corresponding 'R<sup>2</sup>' or communality of the associated indicator.

Correlations: These are standardised values for the loadings reported in the Loadings output. They represent correlations between the indicators and factors.

| <b>Profile in numbers - 6-DP</b>                                                                                                                                                                                                                                                                                                                                                                                                                                                             |          |        |          |        |          |        |          |        |          |        |          |        |
|----------------------------------------------------------------------------------------------------------------------------------------------------------------------------------------------------------------------------------------------------------------------------------------------------------------------------------------------------------------------------------------------------------------------------------------------------------------------------------------------|----------|--------|----------|--------|----------|--------|----------|--------|----------|--------|----------|--------|
| The first row of numbers shows how large each cluster is. The body of the table contains (marginal) conditional probabilities that show how the clusters are related to the Nominal or Ordinal indicator variables. These probabilities sum to 1 within each cluster (column). For indicators specified as Continuous, the body of the table contains means instead of probabilities. For indicators specified as Ordinal, means are displayed in addition to the conditional probabilities. |          |        |          |        |          |        |          |        |          |        |          |        |
| <b>Profile in numbers, 6-DP<br/>Activity domain,<br/>sum.score</b>                                                                                                                                                                                                                                                                                                                                                                                                                           | Cluster1 | s.e.   | Cluster2 | s.e.   | Cluster3 | s.e.   | Cluster4 | s.e.   | Cluster5 | s.e.   | Cluster6 | s.e.   |
| Cluster Size                                                                                                                                                                                                                                                                                                                                                                                                                                                                                 | 29,01%   | 0,1038 | 27,30%   | 0,0633 | 17,06%   | 0,0966 | 12,31%   | 0,0369 | 9,29%    | 0,0377 | 5,03%    | 0,0347 |
| Indicators                                                                                                                                                                                                                                                                                                                                                                                                                                                                                   |          |        |          |        |          |        |          |        |          |        |          |        |
| rmprop                                                                                                                                                                                                                                                                                                                                                                                                                                                                                       |          |        |          |        |          |        |          |        |          |        |          |        |
| Mean                                                                                                                                                                                                                                                                                                                                                                                                                                                                                         | 40,5903  | 5,1765 | 69,2903  | 2,0155 | 43,8455  | 3,3233 | 14,5804  | 2,6022 | 84,4772  | 2,5699 | 75,6924  | 3,5147 |
| fabq130                                                                                                                                                                                                                                                                                                                                                                                                                                                                                      |          |        |          |        |          |        |          |        |          |        |          |        |
| 0                                                                                                                                                                                                                                                                                                                                                                                                                                                                                            | 0,8817   | 0,068  | 0,4677   | 0,0922 | 0,6466   | 0,1025 | 0,9968   | 0,0105 | 0,0569   | 0,0931 | 0,5252   | 0,1661 |
| 1                                                                                                                                                                                                                                                                                                                                                                                                                                                                                            | 0,0556   | 0,0196 | 0,1057   | 0,0149 | 0,0964   | 0,0176 | 0,003    | 0,0095 | 0,0533   | 0,0382 | 0,1044   | 0,0151 |
| 2                                                                                                                                                                                                                                                                                                                                                                                                                                                                                            | 0,0627   | 0,0497 | 0,4266   | 0,0894 | 0,257    | 0,0909 | 0,0002   | 0,001  | 0,8898   | 0,1307 | 0,3704   | 0,1617 |
| Mean                                                                                                                                                                                                                                                                                                                                                                                                                                                                                         | 0,181    | 0,1175 | 0,9589   | 0,181  | 0,6104   | 0,193  | 0,0034   | 0,0116 | 1,8329   | 0,2236 | 0,8452   | 0,3274 |
| facetsit                                                                                                                                                                                                                                                                                                                                                                                                                                                                                     |          |        |          |        |          |        |          |        |          |        |          |        |
| 0                                                                                                                                                                                                                                                                                                                                                                                                                                                                                            | 0,9755   | 0,1218 | 0,8494   | 0,0608 | 0,5002   | 0,201  | 0,7319   | 0,0728 | 0,8167   | 0,0867 | 0,2266   | 0,3527 |
| 1                                                                                                                                                                                                                                                                                                                                                                                                                                                                                            | 0,0245   | 0,1218 | 0,1506   | 0,0608 | 0,4998   | 0,201  | 0,2681   | 0,0728 | 0,1833   | 0,0867 | 0,7734   | 0,3527 |
| facetwalk                                                                                                                                                                                                                                                                                                                                                                                                                                                                                    |          |        |          |        |          |        |          |        |          |        |          |        |
| 0                                                                                                                                                                                                                                                                                                                                                                                                                                                                                            | 0,3354   | 0,0535 | 0,2983   | 0,0711 | 0,3335   | 0,0721 | 0,2814   | 0,064  | 0,4427   | 0,1027 | 0,9195   | 0,1946 |
| 1                                                                                                                                                                                                                                                                                                                                                                                                                                                                                            | 0,6646   | 0,0535 | 0,7017   | 0,0711 | 0,6665   | 0,0721 | 0,7186   | 0,064  | 0,5573   | 0,1027 | 0,0805   | 0,1946 |

| <b>Loadings, 6-DP<br/>Act. domain, sum. score</b> | Clusters | R <sup>2</sup> |
|---------------------------------------------------|----------|----------------|
| rmprop                                            | 0,8666   | 0,751          |
| fabq130                                           | 0,5872   | 0,3448         |
| facetsit                                          | 0,4903   | 0,2404         |
| facetwalk                                         | 0,2835   | 0,0804         |

#### Loadings

The quantities reported under Clusters are simply correlations, representing the square root of the corresponding 'R<sup>2</sup>' or communality of the associated indicator.

Correlations: These are standardised values for the loadings reported in the Loadings output. They represent correlations between the indicators and factors.

| <b>Profile in numbers - 7-DP</b>                                                                                                                                                                                                                                                                                                                                                                                                                                                             |                 |             |                 |             |                 |             |                 |             |                 |             |                 |             |                 |             |
|----------------------------------------------------------------------------------------------------------------------------------------------------------------------------------------------------------------------------------------------------------------------------------------------------------------------------------------------------------------------------------------------------------------------------------------------------------------------------------------------|-----------------|-------------|-----------------|-------------|-----------------|-------------|-----------------|-------------|-----------------|-------------|-----------------|-------------|-----------------|-------------|
| The first row of numbers shows how large each cluster is. The body of the table contains (marginal) conditional probabilities that show how the clusters are related to the Nominal or Ordinal indicator variables. These probabilities sum to 1 within each cluster (column). For indicators specified as Continuous, the body of the table contains means instead of probabilities. For indicators specified as Ordinal, means are displayed in addition to the conditional probabilities. |                 |             |                 |             |                 |             |                 |             |                 |             |                 |             |                 |             |
| <b>Profile in numbers, 7-DP, Activity domain, sum.score</b>                                                                                                                                                                                                                                                                                                                                                                                                                                  | <b>Cluster1</b> | <b>s.e.</b> | <b>Cluster2</b> | <b>s.e.</b> | <b>Cluster3</b> | <b>s.e.</b> | <b>Cluster4</b> | <b>s.e.</b> | <b>Cluster5</b> | <b>s.e.</b> | <b>Cluster6</b> | <b>s.e.</b> | <b>Cluster7</b> | <b>s.e.</b> |
| Cluster Size                                                                                                                                                                                                                                                                                                                                                                                                                                                                                 | 21,73%          | 0,0624      | 17,02%          | 0,0718      | 16,03%          | 0,1157      | 13,58%          | 0,0588      | 11,41%          | 0,0599      | 11,33%          | 0,0478      | 8,90%           | 0,0605      |
| <b>Indicators</b>                                                                                                                                                                                                                                                                                                                                                                                                                                                                            |                 |             |                 |             |                 |             |                 |             |                 |             |                 |             |                 |             |
| rmprop                                                                                                                                                                                                                                                                                                                                                                                                                                                                                       |                 |             |                 |             |                 |             |                 |             |                 |             |                 |             |                 |             |
| Mean                                                                                                                                                                                                                                                                                                                                                                                                                                                                                         | 74,5775         | 2,8788      | 63,2459         | 2,6206      | 47,1248         | 7,6887      | 34,8333         | 4,6485      | 13,427          | 3,6839      | 34,9585         | 12,3164     | 77,2131         | 2,6453      |
| fabq130                                                                                                                                                                                                                                                                                                                                                                                                                                                                                      |                 |             |                 |             |                 |             |                 |             |                 |             |                 |             |                 |             |
| 0                                                                                                                                                                                                                                                                                                                                                                                                                                                                                            | 0,0978          | 0,0872      | 0,9715          | 0,0828      | 0,5916          | 0,2125      | 0,8252          | 0,1519      | 0,9975          | 0,0087      | 0,9185          | 0,0774      | 0,4171          | 0,1604      |
| 1                                                                                                                                                                                                                                                                                                                                                                                                                                                                                            | 0,0868          | 0,0319      | 0,0228          | 0,0545      | 0,1257          | 0,0361      | 0,0841          | 0,042       | 0,0024          | 0,0083      | 0,0512          | 0,0336      | 0,1331          | 0,0261      |
| 2                                                                                                                                                                                                                                                                                                                                                                                                                                                                                            | 0,8154          | 0,1153      | 0,0057          | 0,0284      | 0,2827          | 0,1844      | 0,0907          | 0,1126      | 0,0001          | 0,0004      | 0,0303          | 0,0448      | 0,4498          | 0,1662      |
| Mean                                                                                                                                                                                                                                                                                                                                                                                                                                                                                         | 1,7175          | 0,2019      | 0,0342          | 0,1111      | 0,6911          | 0,3963      | 0,2655          | 0,2641      | 0,0026          | 0,0092      | 0,1118          | 0,122       | 1,0327          | 0,3256      |
| facetsit                                                                                                                                                                                                                                                                                                                                                                                                                                                                                     |                 |             |                 |             |                 |             |                 |             |                 |             |                 |             |                 |             |
| 0                                                                                                                                                                                                                                                                                                                                                                                                                                                                                            | 0,8761          | 0,0666      | 0,9221          | 0,1219      | 0,4757          | 0,3933      | 0,9292          | 0,1509      | 0,7505          | 0,0619      | 0,907           | 0,2127      | 0,44            | 0,2632      |
| 1                                                                                                                                                                                                                                                                                                                                                                                                                                                                                            | 0,1239          | 0,0666      | 0,0779          | 0,1219      | 0,5243          | 0,3933      | 0,0708          | 0,1509      | 0,2495          | 0,0619      | 0,093           | 0,2127      | 0,56            | 0,2632      |
| facetwalk                                                                                                                                                                                                                                                                                                                                                                                                                                                                                    |                 |             |                 |             |                 |             |                 |             |                 |             |                 |             |                 |             |
| 0                                                                                                                                                                                                                                                                                                                                                                                                                                                                                            | 0,3021          | 0,1223      | 0,2021          | 0,1526      | 0,3519          | 0,1688      | 0,0143          | 0,0606      | 0,1616          | 0,1965      | 0,9396          | 0,204       | 0,8386          | 0,2028      |
| 1                                                                                                                                                                                                                                                                                                                                                                                                                                                                                            | 0,6979          | 0,1223      | 0,7979          | 0,1526      | 0,6481          | 0,1688      | 0,9857          | 0,0606      | 0,8384          | 0,1965      | 0,0604          | 0,204       | 0,1614          | 0,2028      |

| <b>Loadings – 7-DP Act. domain, sum. score</b> | <b>Clusters</b> | <b>R<sup>2</sup></b> |
|------------------------------------------------|-----------------|----------------------|
| rmprop                                         | 0,8729          | 0,7619               |
| fabq130                                        | 0,7335          | 0,5381               |
| facetsit                                       | 0,453           | 0,2052               |
| facetwalk                                      | 0,6051          | 0,3661               |

### Loadings

The quantities reported under Clusters are simply correlations, representing the square root of the corresponding 'R<sup>2</sup>' or communality of the associated indicator.

Correlations: These are standardized values for the loadings reported in the Loadings output. They represent correlations between the indicators and factors.



## Participation domain – summary-score strategy

**Profile-plots:** Results with 2 to 8 domain profiles based on the following variables:

|       |                                                                                                                                                                                                                                                                                                                                                                                                                                                                                                                                                                                                                                                                                                                                                                   |
|-------|-------------------------------------------------------------------------------------------------------------------------------------------------------------------------------------------------------------------------------------------------------------------------------------------------------------------------------------------------------------------------------------------------------------------------------------------------------------------------------------------------------------------------------------------------------------------------------------------------------------------------------------------------------------------------------------------------------------------------------------------------------------------|
| Bfbe0 | Physical load at work: 1=sitting, 2=sitting and walking, 3=light physical load, 4=heavy physical load                                                                                                                                                                                                                                                                                                                                                                                                                                                                                                                                                                                                                                                             |
| Dlsy0 | Days with sick leave the last month (0, 1-5, 6-31)                                                                                                                                                                                                                                                                                                                                                                                                                                                                                                                                                                                                                                                                                                                |
| Fabqw | Sum-score representing the following items from the Fear Avoidance Beliefs Questionnaire: 6,7,9,10,11,12,15<br>FABQ6: My pain was caused by my work or by an accident at work (0=disagree, 1=don't know, 2=agree)<br>FABQ7: My work aggravated my pain (0=disagree, 1=don't know, 2=agree)<br>FABQ9: My work is too heavy for me (0=disagree, 1=don't know, 2=agree)<br>FABQ10: My work makes or would make my pain worse (0=disagree, 1=don't know, 2=agree)<br>FABQ11: My work might harm my back (0=disagree, 3= don't know, 6=agree)<br>FABQ12: I should not do my normal work with my present pain (0=disagree, 3= don't know, 6=agree)<br>FABQ15: I do not think that I will be back to my normal work within 3 months (0=disagree, 3= don't know, 6=agree) |

### AMN's suggestion on final model: 5 domain profiles (clusters)

Cluster 1: Low physical work load (Sitting and walking at work) and very few fear avoidance beliefs in relation to work

Cluster 2: Moderate physical work load (sitting, walking and light physical load) and few fear avoidance beliefs in relation to work

Cluster 3: High physical work load (sits, walks and often light-heavy physical work load) and moderate fear avoidance beliefs in relation to work

Cluster 4: Very high physical work load (often heavy physical work load) and high fear avoidance beliefs in relation to work

Cluster 5: Very low physical work load (sitting) and few fear avoidance beliefs

### Facts:

Lowest cluster size = 10.35%

BIC was the same each time in 7 out of 10 rounds

Adding more clusters does not seem to change the 'quantitative presentation' – the more heavy workload the higher fear avoidance beliefs

Participation domain, summary-score, 2-domain profiles

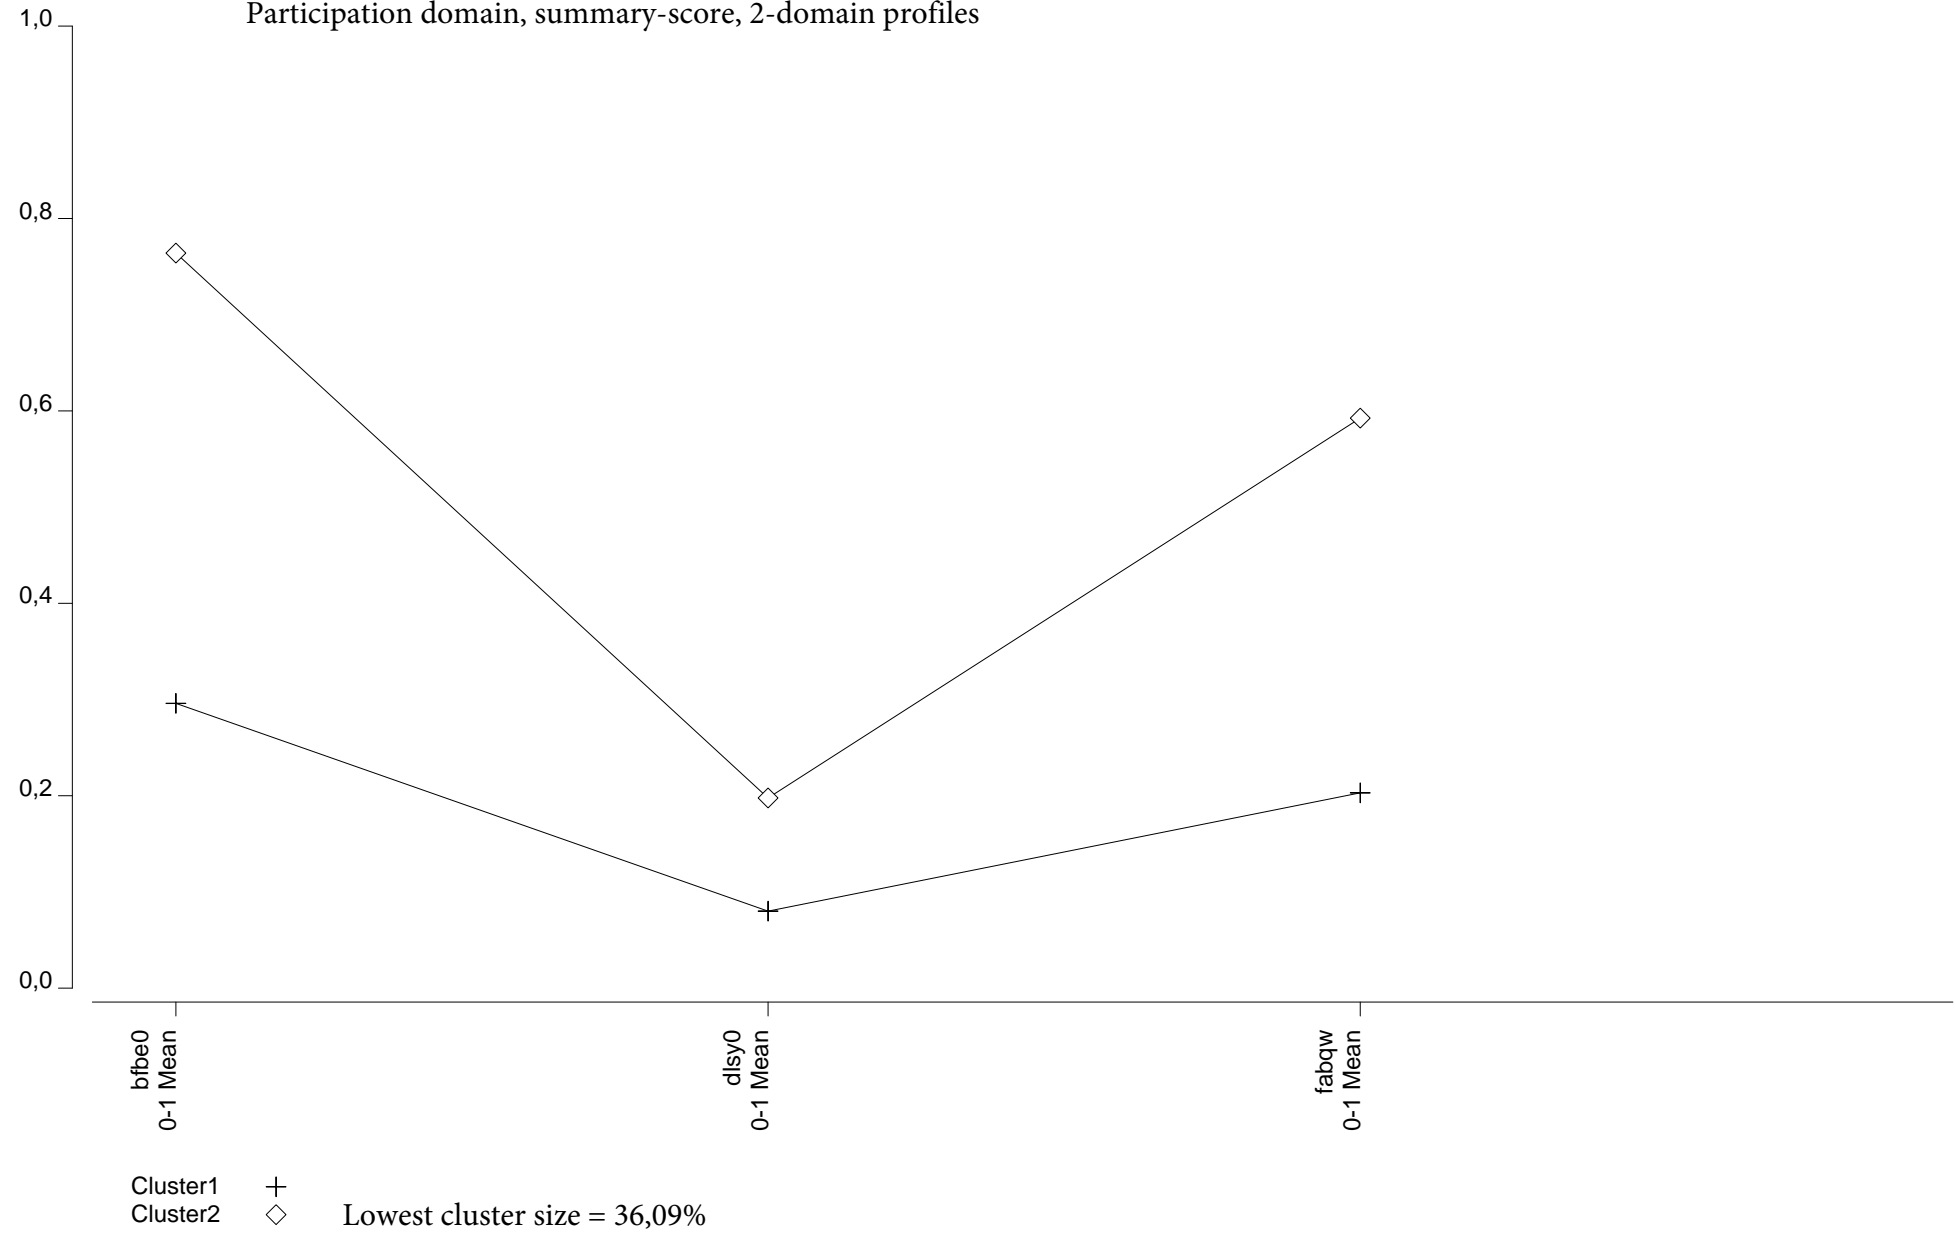

Participation domain, summary-score, 3-domain profiles

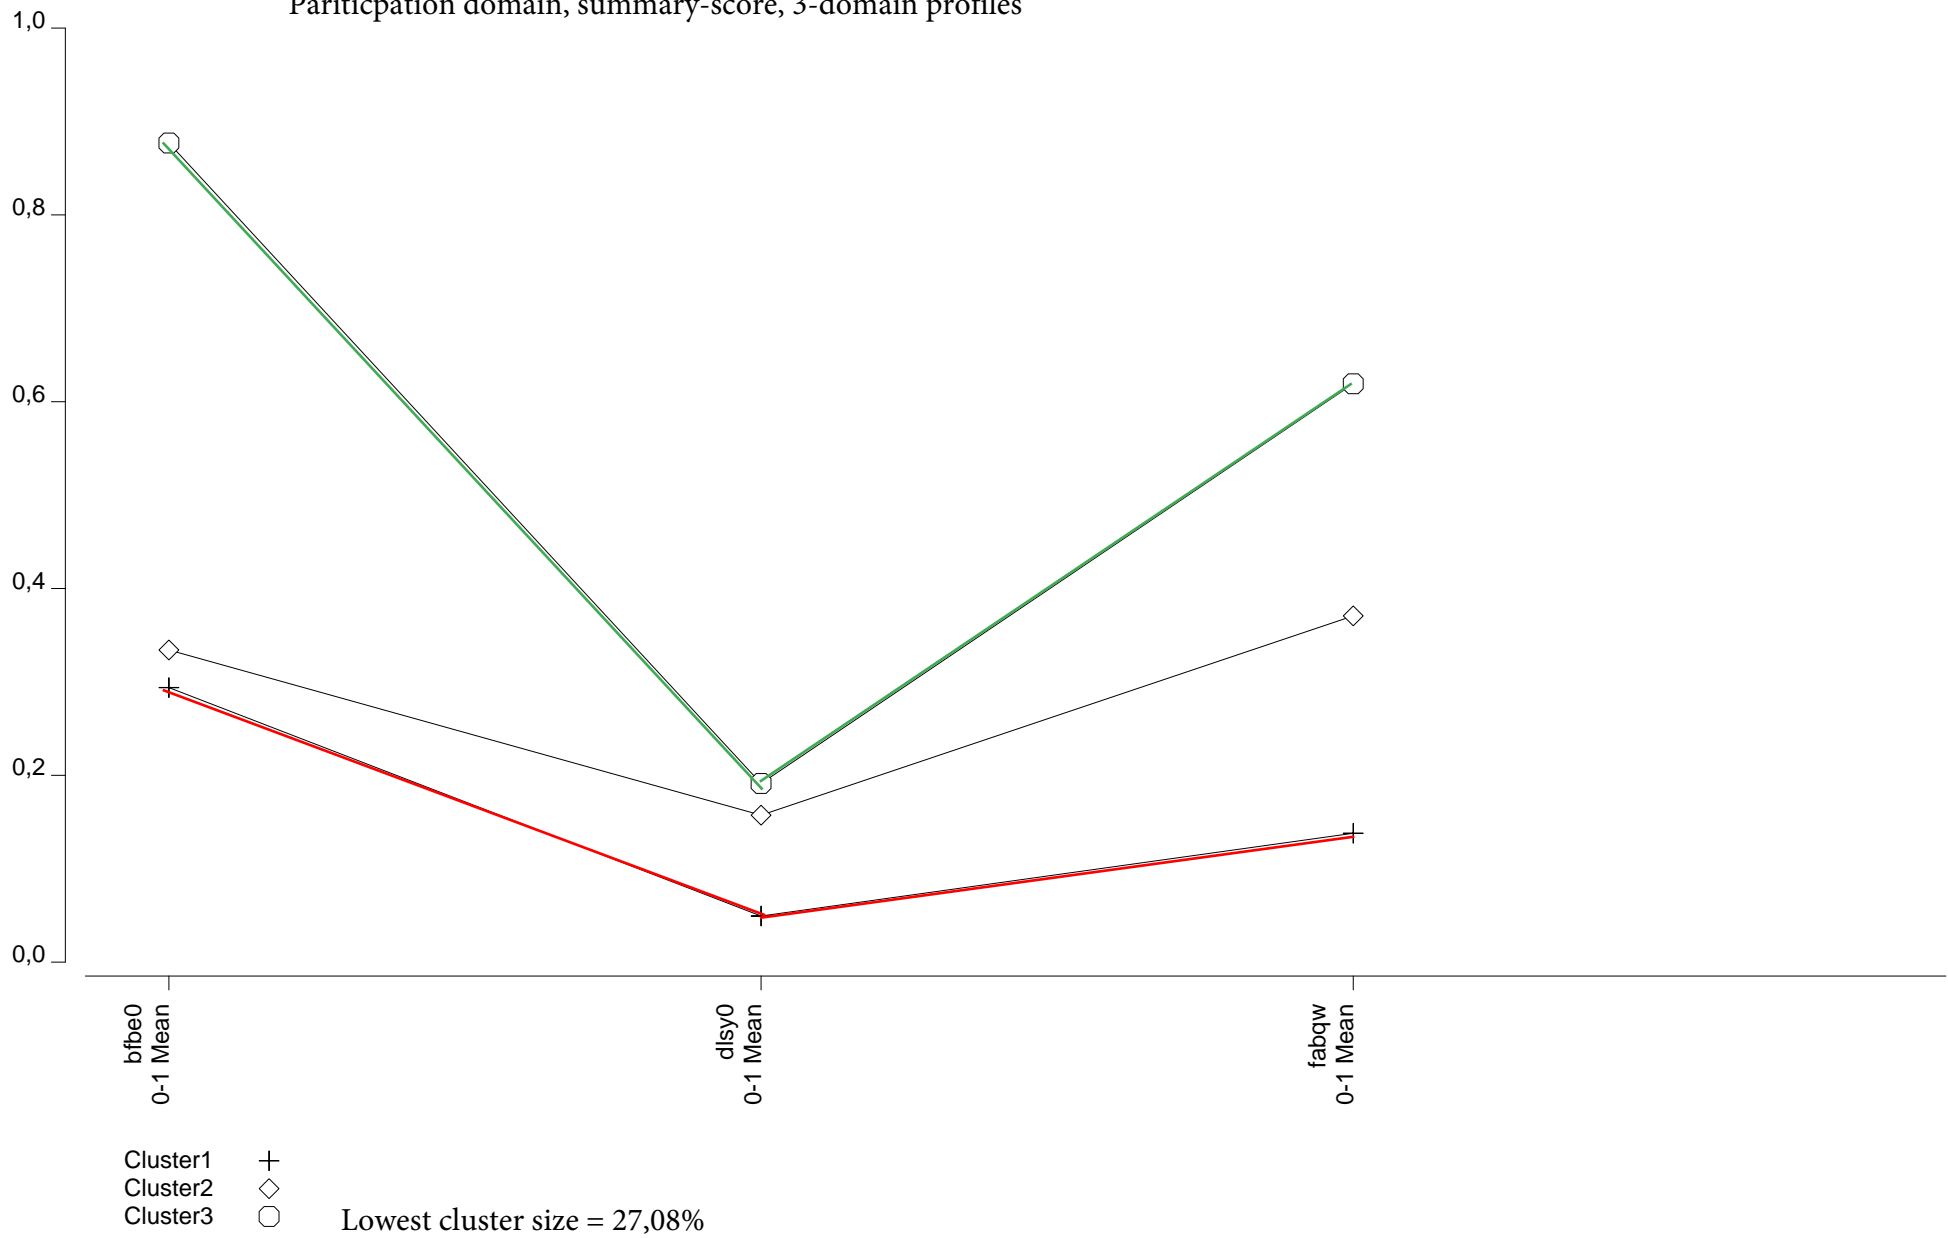

Participation domain, summary-score, 4-domain profiles

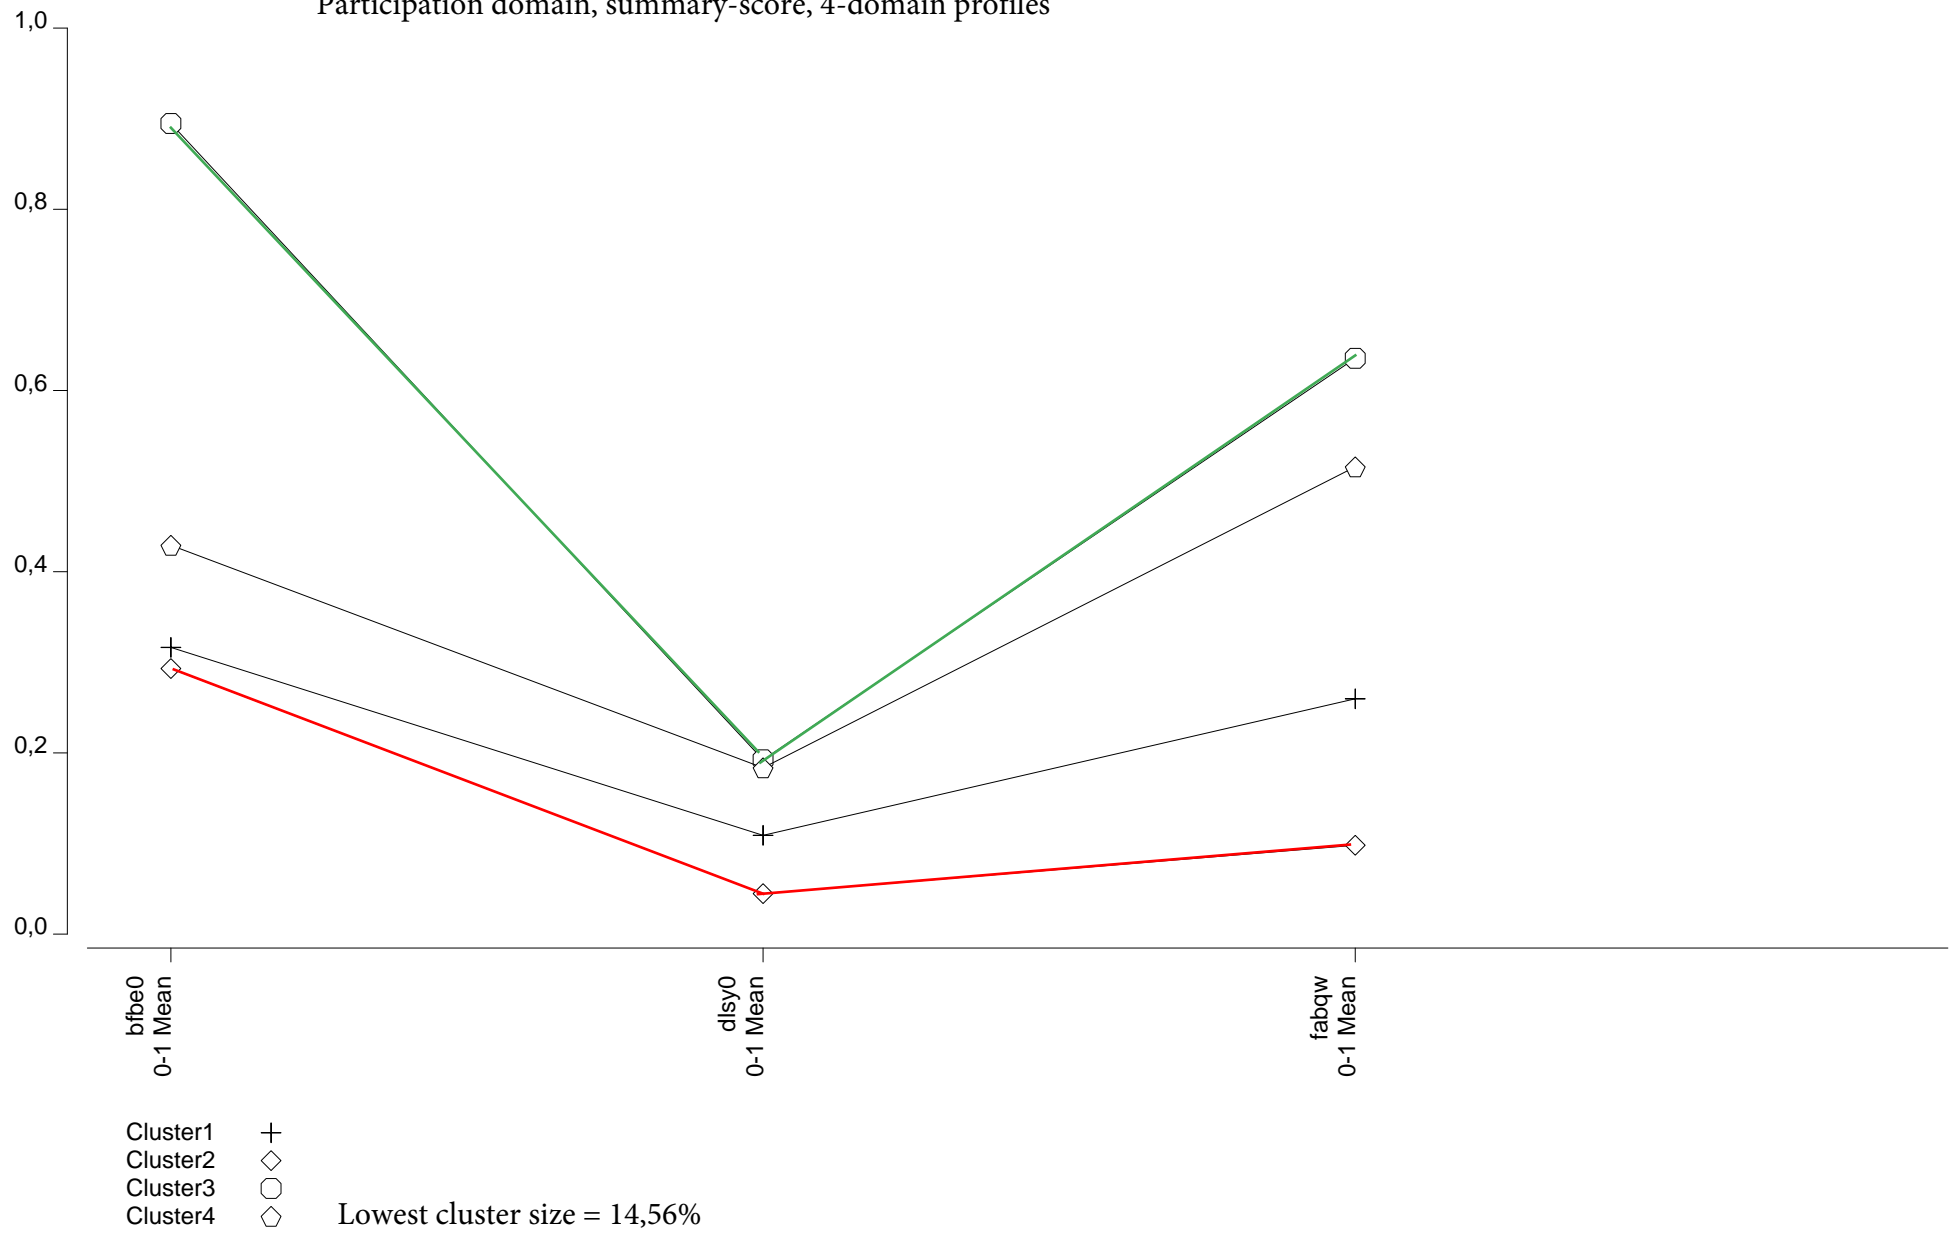

Participation domain, summary-score strategy, 5-domain profiles

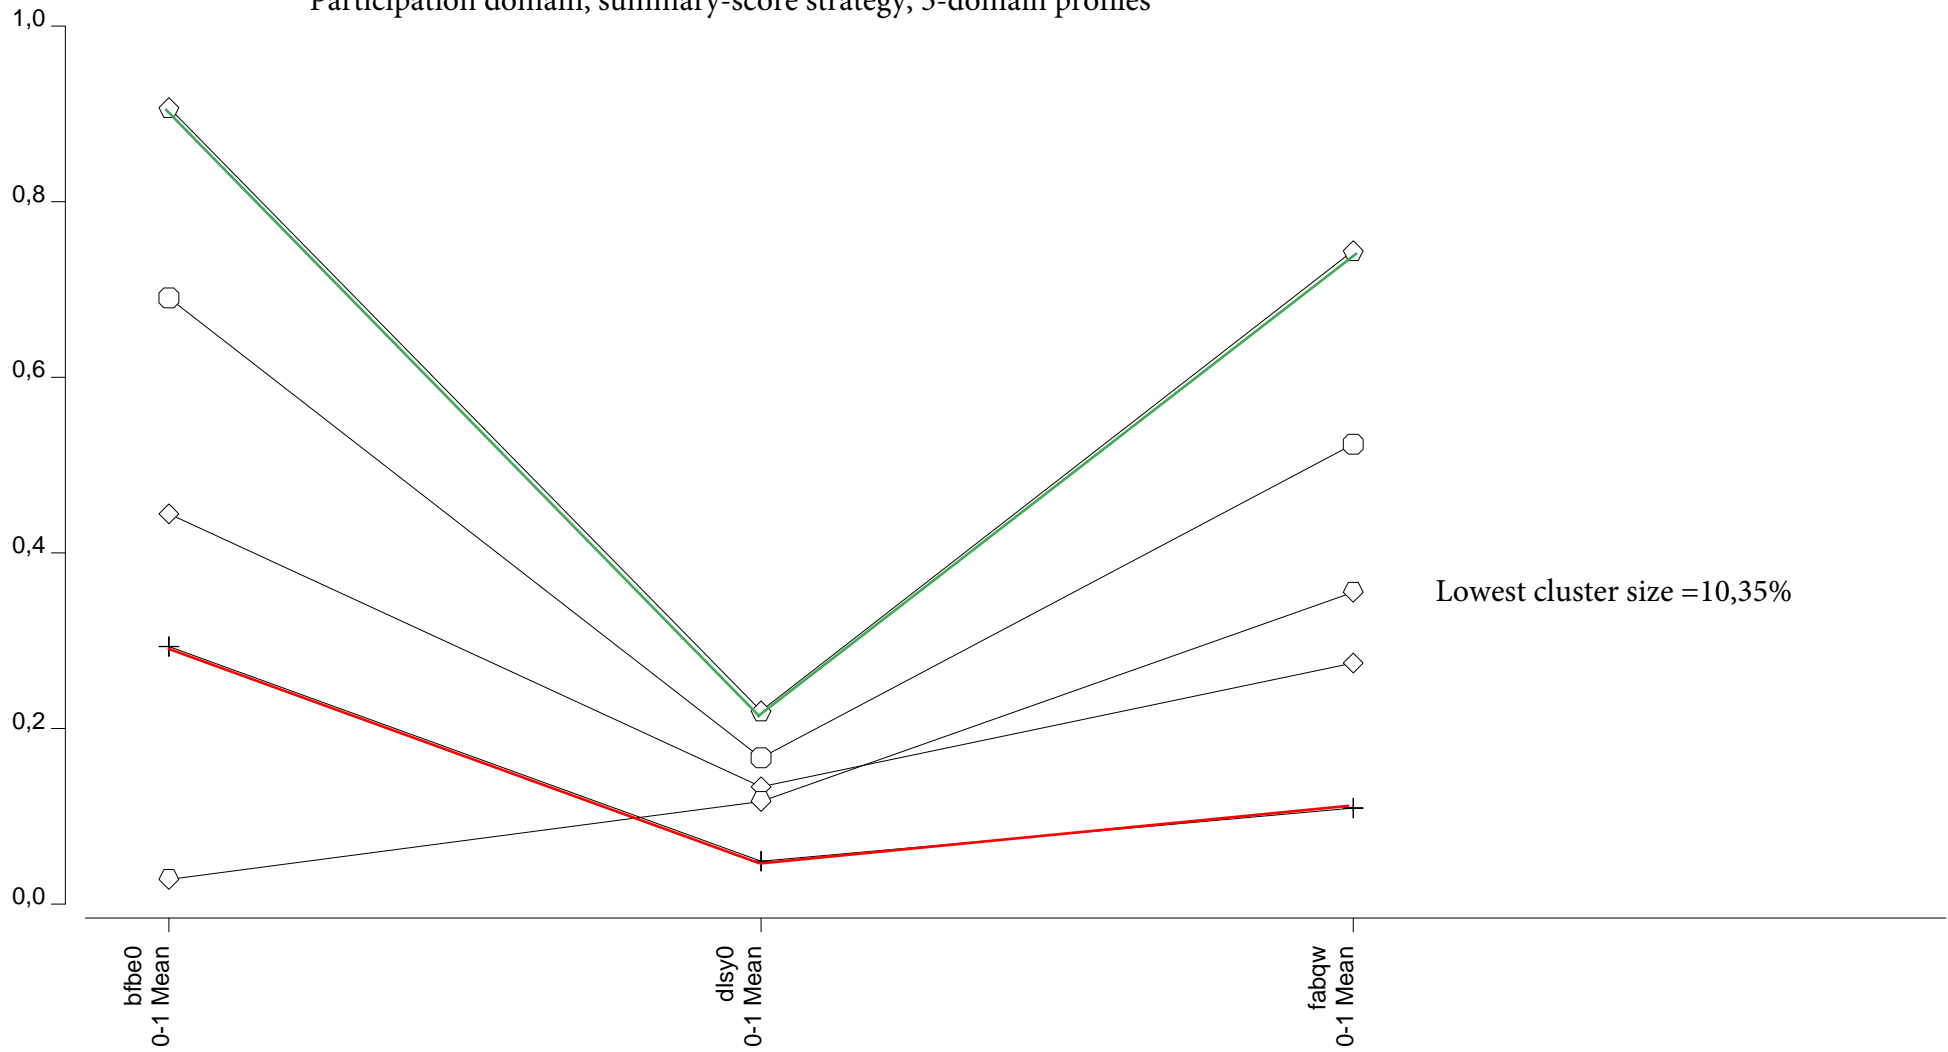

Lowest cluster size = 10,35%

- Cluster1 + Cluster 1: Low physical work load (Sitting and walking at work) and very few fear avoidance beliefs in relation to work
- Cluster2 ◇ Cluster 2: Moderate physical work load (sitting, walking and light physical load) and few fear avoidance beliefs in relation to work
- Cluster3 ○ Cluster 3: High physical work load (sits, walks and often light-heavy physical work load) and moderate fear avoidance beliefs in relation to work
- Cluster4 ◇ Cluster 4: Very high physical work load (often heavy physical work load) and high fear avoidance beliefs in relation to work
- Cluster5 ◇ Cluster 5: Very low physical work load (sitting) and few fear avoidance beliefs

Participation domain, summary-score, 6-domain profiles

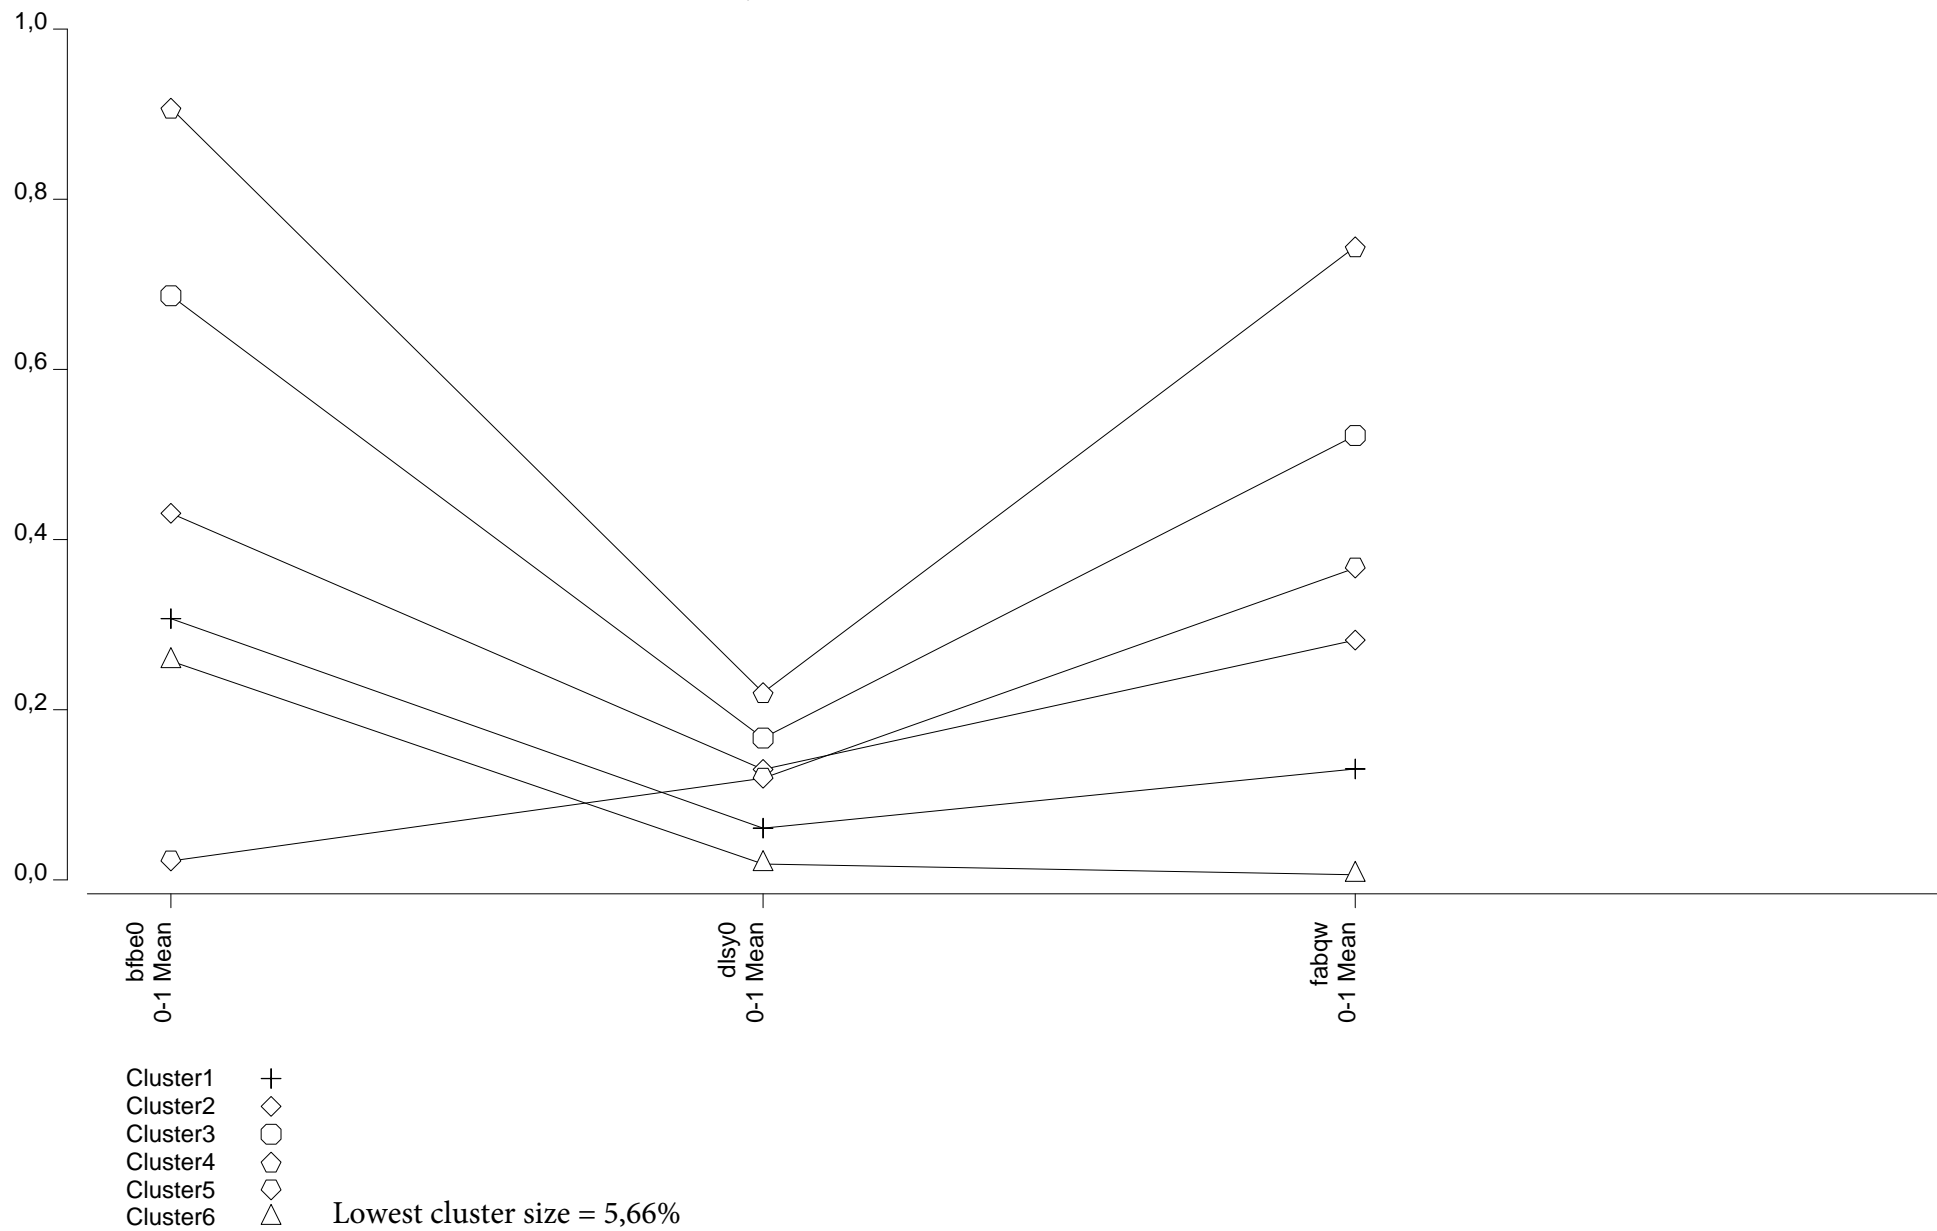

Participation domain, summary-score, 7-domain profiles

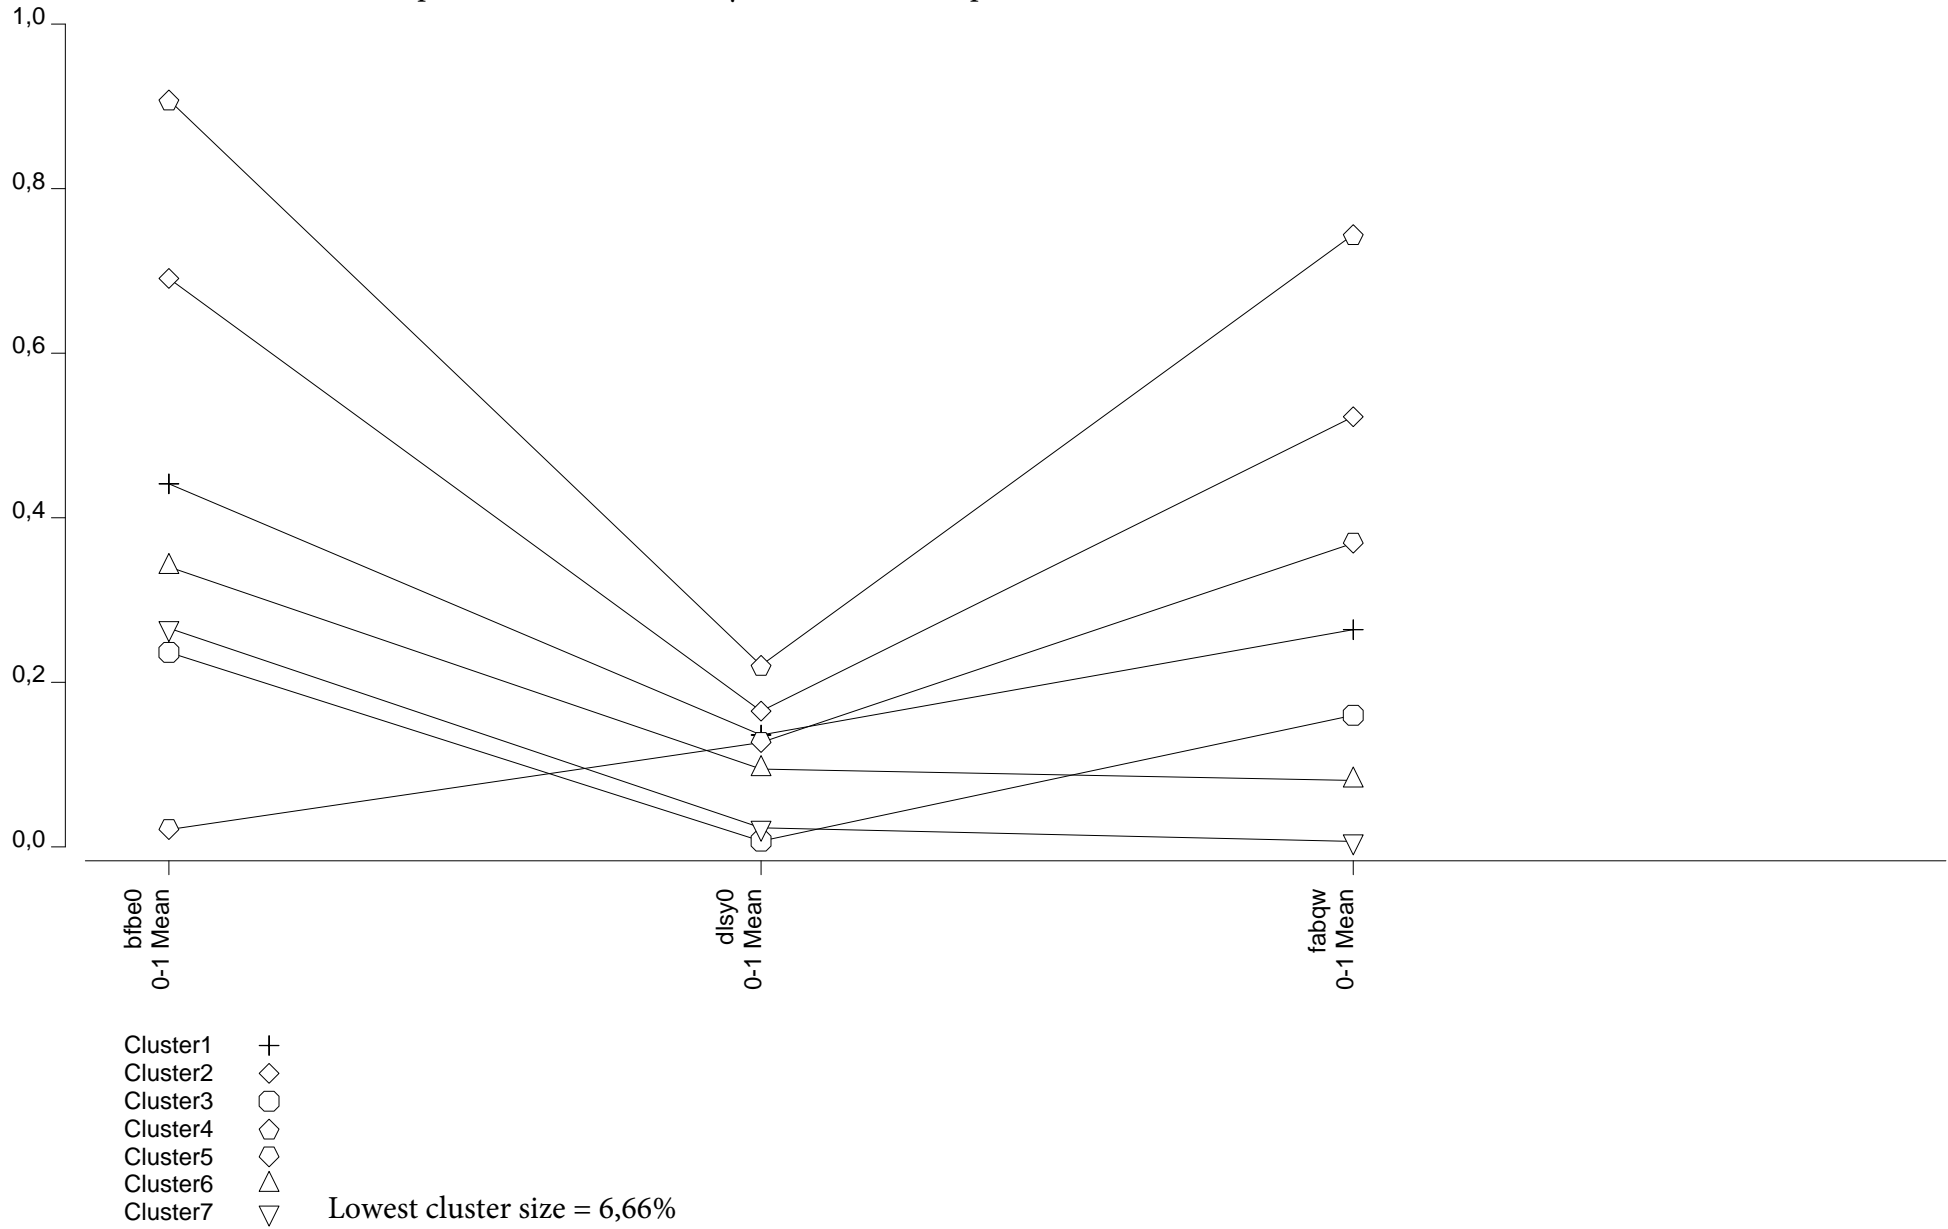

Participation domain, summary-score, 8-domain profiles

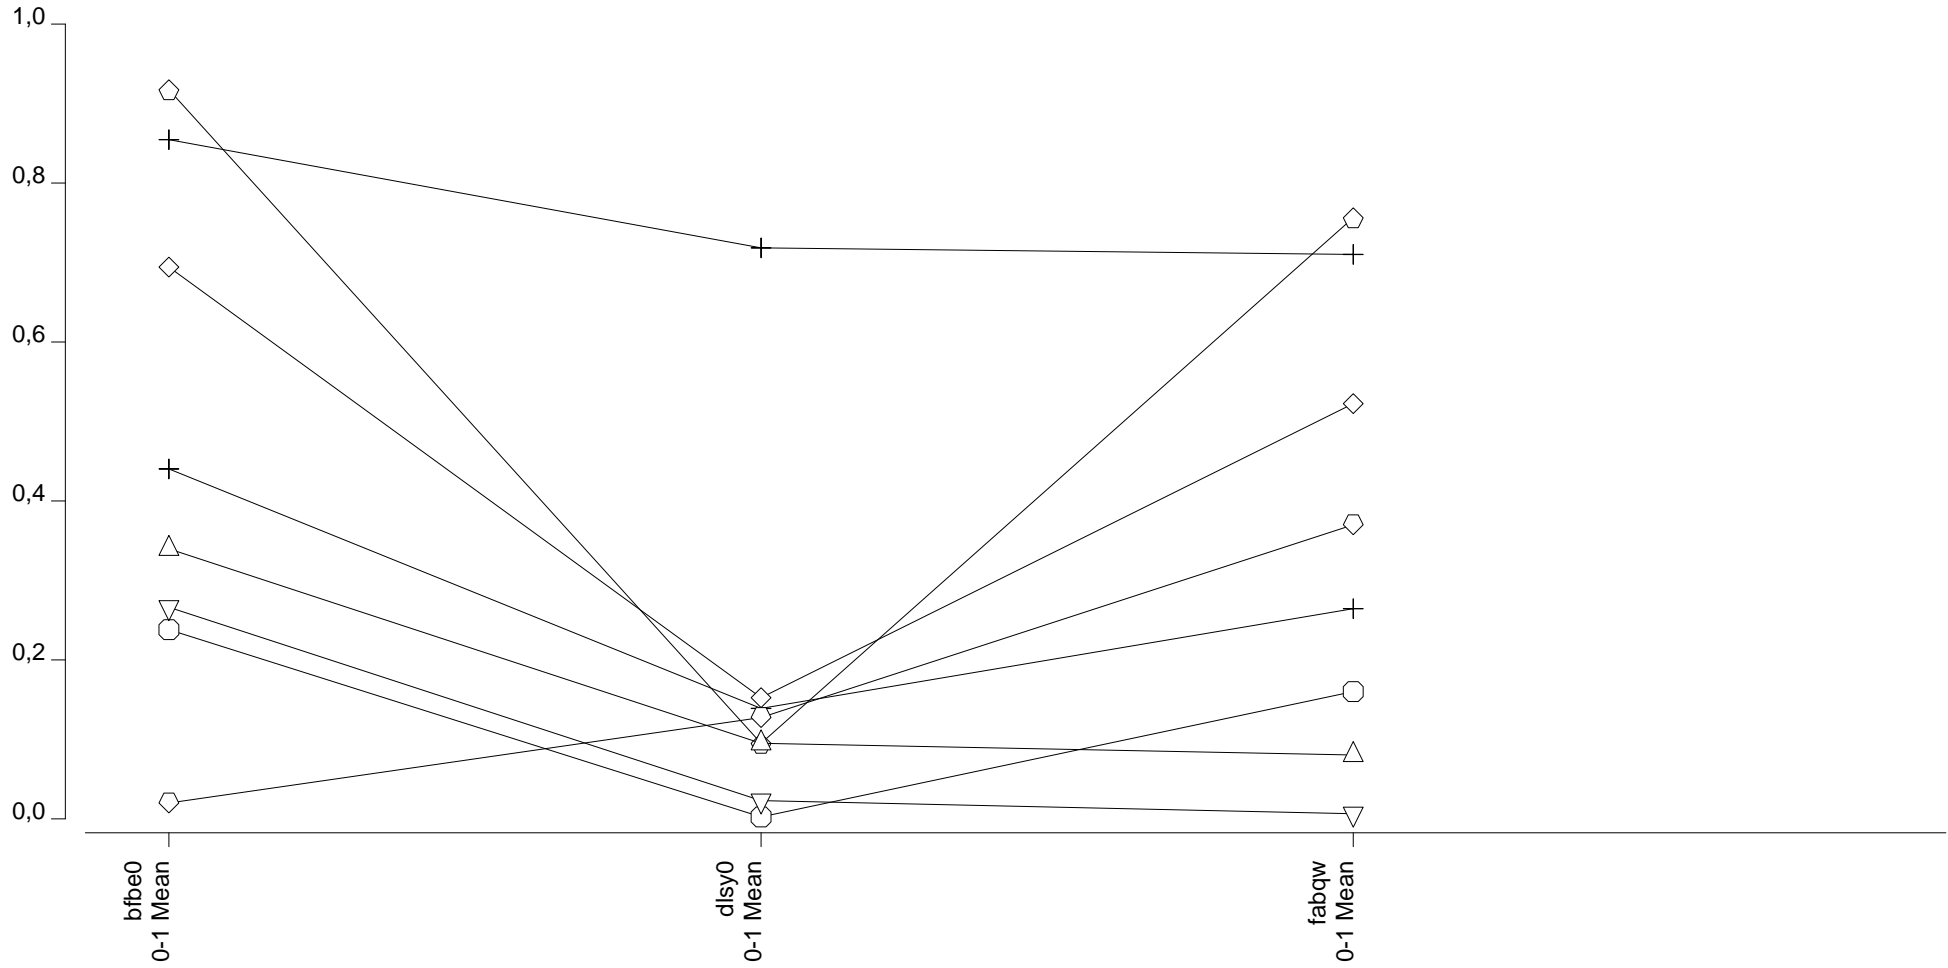

Cluster1 +  
 Cluster2 ◇  
 Cluster3 ○  
 Cluster4 ◇  
 Cluster5 ◇  
 Cluster6 △  
 Cluster7 ▽  
 Cluster8 +    Lowest cluster size = 3,07%



**Profile in numbers – 3-DP**

The first row of numbers shows how large each cluster is. The body of the table contains (marginal) conditional probabilities that show how the clusters are related to the Nominal or Ordinal indicator variables. These probabilities sum to 1 within each cluster (column). For indicators specified as Continuous, the body of the table contains means instead of probabilities. For indicators specified as Ordinal, means are displayed in addition to the conditional probabilities.

| <b>Part.domain, 3-DP<br/>sum.score</b> | <b>Cluster1</b> | <b>s.e.</b> | <b>Cluster2</b> | <b>s.e.</b> | <b>Cluster3</b> | <b>s.e.</b> |
|----------------------------------------|-----------------|-------------|-----------------|-------------|-----------------|-------------|
| Cluster Size                           | 40,69%          | 0,0554      | 32,23%          | 0,0607      | 27,08%          | 0,0341      |
| <b>Indicators</b>                      |                 |             |                 |             |                 |             |
| bfbe0                                  |                 |             |                 |             |                 |             |
| 1                                      | 0,3489          | 0,0309      | 0,2932          | 0,0539      | 0,0027          | 0,002       |
| 2                                      | 0,4516          | 0,0244      | 0,4565          | 0,0245      | 0,0494          | 0,0215      |
| 3                                      | 0,1686          | 0,0194      | 0,205           | 0,0421      | 0,2625          | 0,0392      |
| 4                                      | 0,0309          | 0,0102      | 0,0452          | 0,0267      | 0,6854          | 0,056       |
| Mean                                   | 1,8816          | 0,0543      | 2,0023          | 0,1418      | 3,6307          | 0,0781      |
| dlsy0                                  |                 |             |                 |             |                 |             |
| 0                                      | 0,9049          | 0,024       | 0,7171          | 0,0377      | 0,6636          | 0,0336      |
| 1                                      | 0,0917          | 0,0223      | 0,2512          | 0,0311      | 0,2905          | 0,0277      |
| 2                                      | 0,0033          | 0,002       | 0,0317          | 0,0101      | 0,0458          | 0,0121      |
| Mean                                   | 0,0984          | 0,0258      | 0,3146          | 0,0456      | 0,3822          | 0,0421      |
| fabqw                                  |                 |             |                 |             |                 |             |
| Mean                                   | 5,2362          | 0,4387      | 14,0861         | 1,1816      | 23,5269         | 0,9296      |

| <b>Loadings - 3-DP, sum.score</b> | <b>Clusters</b> | <b>R<sup>2</sup></b> |
|-----------------------------------|-----------------|----------------------|
| <b>Part.domain</b>                |                 |                      |
| bfbe0                             | 0,7078          | 0,501                |
| dlsy0                             | 0,2571          | 0,0661               |
| fabqw                             | 0,8224          | 0,6763               |

**Loadings**

The quantities reported under Clusters are simply correlations, representing the square root of the corresponding 'R<sup>2</sup>' or communality of the associated indicator.

Correlations: These are standardised values for the loadings reported in the Loadings output. They represent correlations between the indicators and factors.

| <b>Profile in numbers – 4-DP</b>                                                                                                                                                                                                                                                                                                                                                                                                                                                             |          |        |          |        |          |        |          |        |
|----------------------------------------------------------------------------------------------------------------------------------------------------------------------------------------------------------------------------------------------------------------------------------------------------------------------------------------------------------------------------------------------------------------------------------------------------------------------------------------------|----------|--------|----------|--------|----------|--------|----------|--------|
| The first row of numbers shows how large each cluster is. The body of the table contains (marginal) conditional probabilities that show how the clusters are related to the Nominal or Ordinal indicator variables. These probabilities sum to 1 within each cluster (column). For indicators specified as Continuous, the body of the table contains means instead of probabilities. For indicators specified as Ordinal, means are displayed in addition to the conditional probabilities. |          |        |          |        |          |        |          |        |
| <b>Part.domain, 4-DP, Sum.score</b>                                                                                                                                                                                                                                                                                                                                                                                                                                                          | Cluster1 | s.e.   | Cluster2 | s.e.   | Cluster3 | s.e.   | Cluster4 | s.e.   |
| Cluster Size                                                                                                                                                                                                                                                                                                                                                                                                                                                                                 | 34,67%   | 0,0806 | 26,87%   | 0,0857 | 23,90%   | 0,0426 | 14,56%   | 0,0487 |
| Indicators                                                                                                                                                                                                                                                                                                                                                                                                                                                                                   |          |        |          |        |          |        |          |        |
| bfbe0                                                                                                                                                                                                                                                                                                                                                                                                                                                                                        |          |        |          |        |          |        |          |        |
| 1                                                                                                                                                                                                                                                                                                                                                                                                                                                                                            | 0,3241   | 0,0365 | 0,3569   | 0,0376 | 0,0021   | 0,0018 | 0,1955   | 0,0837 |
| 2                                                                                                                                                                                                                                                                                                                                                                                                                                                                                            | 0,4455   | 0,0227 | 0,4415   | 0,0241 | 0,0397   | 0,0192 | 0,4231   | 0,0571 |
| 3                                                                                                                                                                                                                                                                                                                                                                                                                                                                                            | 0,1874   | 0,0249 | 0,1672   | 0,0238 | 0,2303   | 0,0439 | 0,2804   | 0,063  |
| 4                                                                                                                                                                                                                                                                                                                                                                                                                                                                                            | 0,0429   | 0,0209 | 0,0344   | 0,0125 | 0,7279   | 0,0592 | 0,1011   | 0,0792 |
| Mean                                                                                                                                                                                                                                                                                                                                                                                                                                                                                         | 1,9491   | 0,0915 | 1,8792   | 0,0698 | 3,6841   | 0,0786 | 2,287    | 0,2961 |
| dlsy0                                                                                                                                                                                                                                                                                                                                                                                                                                                                                        |          |        |          |        |          |        |          |        |
| 0                                                                                                                                                                                                                                                                                                                                                                                                                                                                                            | 0,7983   | 0,0421 | 0,9135   | 0,0288 | 0,6628   | 0,0375 | 0,6763   | 0,0556 |
| 1                                                                                                                                                                                                                                                                                                                                                                                                                                                                                            | 0,1856   | 0,0357 | 0,0836   | 0,0269 | 0,2899   | 0,03   | 0,2803   | 0,0422 |
| 2                                                                                                                                                                                                                                                                                                                                                                                                                                                                                            | 0,0161   | 0,0076 | 0,0029   | 0,0021 | 0,0473   | 0,0133 | 0,0434   | 0,017  |
| Mean                                                                                                                                                                                                                                                                                                                                                                                                                                                                                         | 0,2178   | 0,0489 | 0,0893   | 0,0308 | 0,3845   | 0,0477 | 0,367    | 0,0707 |
| fabqw                                                                                                                                                                                                                                                                                                                                                                                                                                                                                        |          |        |          |        |          |        |          |        |
| Mean                                                                                                                                                                                                                                                                                                                                                                                                                                                                                         | 9,8628   | 1,3748 | 3,7213   | 0,7237 | 24,1428  | 1,2046 | 19,5955  | 1,4739 |

| <b>Loadings - 4DP, part.domain, sum.score</b> | Clusters | R <sup>2</sup> |
|-----------------------------------------------|----------|----------------|
| bfbe0                                         | 0,6881   | 0,4735         |
| dlsy0                                         | 0,2416   | 0,0583         |
| fabqw                                         | 0,878    | 0,7708         |

#### Loadings

The quantities reported under Clusters are simply correlations, representing the square root of the corresponding 'R<sup>2</sup>' or communality of the associated indicator.

Correlations: These are standardised values for the loadings reported in the Loadings output. They represent correlations between the indicators and factors.

| <b>Profile in numbers – 5-DP</b>                                                                                                                                                                                                                                                                                                                                                                                                                                                             |          |        |          |        |          |        |          |        |          |        |
|----------------------------------------------------------------------------------------------------------------------------------------------------------------------------------------------------------------------------------------------------------------------------------------------------------------------------------------------------------------------------------------------------------------------------------------------------------------------------------------------|----------|--------|----------|--------|----------|--------|----------|--------|----------|--------|
| The first row of numbers shows how large each cluster is. The body of the table contains (marginal) conditional probabilities that show how the clusters are related to the Nominal or Ordinal indicator variables. These probabilities sum to 1 within each cluster (column). For indicators specified as Continuous, the body of the table contains means instead of probabilities. For indicators specified as Ordinal, means are displayed in addition to the conditional probabilities. |          |        |          |        |          |        |          |        |          |        |
| <b>Part.domain, 5-DP<br/>Sum.score</b>                                                                                                                                                                                                                                                                                                                                                                                                                                                       | Cluster1 | s.e.   | Cluster2 | s.e.   | Cluster3 | s.e.   | Cluster4 | s.e.   | Cluster5 | s.e.   |
| Cluster Size                                                                                                                                                                                                                                                                                                                                                                                                                                                                                 | 32,55%   | 0,0593 | 23,00%   | 0,0592 | 20,82%   | 0,0358 | 13,28%   | 0,0293 | 10,35%   | 0,0364 |
| Indicators                                                                                                                                                                                                                                                                                                                                                                                                                                                                                   |          |        |          |        |          |        |          |        |          |        |
| bfbe0                                                                                                                                                                                                                                                                                                                                                                                                                                                                                        |          |        |          |        |          |        |          |        |          |        |
| 1                                                                                                                                                                                                                                                                                                                                                                                                                                                                                            | 0,3156   | 0,0424 | 0,1454   | 0,0615 | 0,0283   | 0,0132 | 0,0012   | 0,001  | 0,917    | 0,1389 |
| 2                                                                                                                                                                                                                                                                                                                                                                                                                                                                                            | 0,5171   | 0,0406 | 0,4832   | 0,0351 | 0,2461   | 0,0464 | 0,0383   | 0,0177 | 0,0818   | 0,1346 |
| 3                                                                                                                                                                                                                                                                                                                                                                                                                                                                                            | 0,1393   | 0,0222 | 0,2641   | 0,0456 | 0,3517   | 0,0268 | 0,1982   | 0,0361 | 0,0012   | 0,0042 |
| 4                                                                                                                                                                                                                                                                                                                                                                                                                                                                                            | 0,0279   | 0,0103 | 0,1073   | 0,0387 | 0,3739   | 0,0612 | 0,7623   | 0,0529 | 0        | 0,0001 |
| Mean                                                                                                                                                                                                                                                                                                                                                                                                                                                                                         | 1,8796   | 0,0689 | 2,3332   | 0,1743 | 3,0711   | 0,1258 | 3,7215   | 0,0715 | 1,0842   | 0,1432 |
| dlsy0                                                                                                                                                                                                                                                                                                                                                                                                                                                                                        |          |        |          |        |          |        |          |        |          |        |
| 0                                                                                                                                                                                                                                                                                                                                                                                                                                                                                            | 0,9057   | 0,0233 | 0,7567   | 0,0458 | 0,7029   | 0,0425 | 0,6207   | 0,0547 | 0,7847   | 0,0583 |
| 1                                                                                                                                                                                                                                                                                                                                                                                                                                                                                            | 0,0909   | 0,0216 | 0,2196   | 0,0377 | 0,261    | 0,0334 | 0,3185   | 0,04   | 0,1969   | 0,0484 |
| 2                                                                                                                                                                                                                                                                                                                                                                                                                                                                                            | 0,0034   | 0,0019 | 0,0237   | 0,0101 | 0,0361   | 0,0126 | 0,0608   | 0,0203 | 0,0184   | 0,0109 |
| Mean                                                                                                                                                                                                                                                                                                                                                                                                                                                                                         | 0,0977   | 0,0251 | 0,2671   | 0,0546 | 0,3331   | 0,053  | 0,4401   | 0,0721 | 0,2337   | 0,0684 |
| fabqw                                                                                                                                                                                                                                                                                                                                                                                                                                                                                        |          |        |          |        |          |        |          |        |          |        |
| Mean                                                                                                                                                                                                                                                                                                                                                                                                                                                                                         | 4,1511   | 0,5368 | 10,43    | 0,9475 | 19,899   | 0,6332 | 28,2757  | 1,2886 | 13,4952  | 1,5327 |

| <b>Loadings - 5-DP<br/>Part.domain, sum.score</b> | Clusters | R <sup>2</sup> |
|---------------------------------------------------|----------|----------------|
| bfbe0                                             | 0,7223   | 0,5217         |
| dlsy0                                             | 0,2438   | 0,0594         |
| fabqw                                             | 0,9139   | 0,8352         |

#### Loadings

The quantities reported under Clusters are simply correlations, representing the square root of the corresponding 'R<sup>2</sup>' or communality of the associated indicator.

Correlations: These are standardised values for the loadings reported in the Loadings output. They represent correlations between the indicators and factors.
